# Supplementary material for: Epigenetic transgenerational inheritance of somatic transcriptomes and epigenetic control regions
Source: Genome Biol. 2012 Oct 3;13(10):R91. doi: 10.1186/gb-2012-13-10-r91 (PMC3491419; doi:10.1186/gb-2012-13-10-r91)
Supplement: Additional file 7 — Table S3 - pathway enrichment in tissue modules. [file gb-2012-13-10-r91-S7.pdf]

**Supplemental Table S3. Pathway Enrichment for Male and Female Rat Tissue Modules**

| Pathway name                                           | Sex.Tissue |                       |      |                |     |              |        |         |          |         |       |                  |      |                |        |           |             |        |         |       |         |         |        |           |          |               |       |          |        |                |             |          |              |
|--------------------------------------------------------|------------|-----------------------|------|----------------|-----|--------------|--------|---------|----------|---------|-------|------------------|------|----------------|--------|-----------|-------------|--------|---------|-------|---------|---------|--------|-----------|----------|---------------|-------|----------|--------|----------------|-------------|----------|--------------|
|                                                        |            | 11 Male & Fem.Tissues |      | 6 Male Tissues |     | Male modules |        |         |          |         |       | 5 Female Tissues |      | Female modules |        |           |             |        |         |       |         |         |        |           |          |               |       |          |        |                |             |          |              |
|                                                        |            |                       |      |                |     | M.Turquoise  | M.Blue | M.Brown | M.Yellow | M.Green | M.Red |                  |      | M.Black        | M.Pink | M.Magenta | F.Turquoise | F.Blue | F.Brown | F.Red | F.Green | F.Black | F.Pink | F.Magenta | F.Purple | F.Greenyellow | F.Tan | F.Salmon | F.Cyan | F.Midnightblue | F.Lightcyan | F.Grey60 | F.Lightgreen |
| Number of genes in input list                          |            | 4059                  | 3046 | 957            | 363 | 525          | 426    | 48      | 7        | 24      | 26    | 17               | 1298 | 148            | 137    | 78        | 51          | 33     | 28      | 31    | 30      | 20      | 25     | 17        | 20       | 18            | 21    | 16       | 19     | 13             | 14          | 22       | 10           |
| Total Number of Pathways                               |            | 230                   | 224  | 200            | 65  | 179          | 73     | 17      | 5        | 2       | 12    | 3                | 191  | 48             | 32     | 44        | 61          | 10     | 11      | 7     | 19      | 4       | 8      | 1         | 10       | 2             | 7     | 8        | 7      | 3              | 7           | 2        | 2            |
| Pathways in cancer                                     |            | 45                    | 32   | 14             | 1   | 14           | 1      | 1       |          |         |       |                  | 17   | 2              | 2      |           | 1           |        |         |       | 1       |         | 1      |           | 2        |               |       |          |        |                |             |          |              |
| Protein processing in endoplasmic reticulum            |            | 39                    | 38   | 26             | 2   | 9            | 1      |         |          |         |       |                  | 3    | 1              |        | 1         |             |        |         |       |         |         |        |           |          |               |       |          |        |                |             |          |              |
| HTLV-I infection                                       |            | 39                    | 31   | 17             | 2   | 4            | 1      |         |          |         |       |                  | 10   | 3              |        | 1         | 1           |        |         |       |         |         |        |           |          |               |       |          |        |                |             |          |              |
| RNA transport                                          |            | 39                    | 31   | 15             | 3   | 7            | 2      |         |          |         |       |                  | 11   | 1              | 1      | 2         |             |        |         |       |         |         |        |           |          |               |       |          |        |                | 1           |          |              |
| Transcriptional misregulation in cancers               |            | 31                    | 26   | 7              | 1   | 13           | 3      |         |          |         |       |                  | 12   | 3              | 1      |           | 2           |        |         |       |         |         |        |           |          |               |       |          |        |                |             | 1        |              |
| Herpes simplex infection                               |            | 30                    | 23   | 7              |     | 7            | 2      |         |          |         |       |                  | 9    |                | 1      | 2         | 1           |        |         |       |         |         |        |           |          |               |       |          |        |                |             |          |              |
| Lysosome                                               |            | 29                    | 27   | 11             | 3   | 5            | 2      |         |          |         |       |                  | 5    | 1              |        |           | 3           |        |         |       |         |         |        |           |          |               |       |          |        |                |             |          |              |
| Ribosome                                               |            | 29                    | 27   |                | 2   | 1            | 23     |         |          |         |       |                  | 4    |                | 1      |           |             |        |         |       |         | 2       |        |           |          |               |       | 1        |        |                |             |          |              |
| Endocytosis                                            |            | 29                    | 26   | 11             |     | 9            | 3      | 1       |          |         |       |                  | 5    |                | 1      |           | 2           |        |         |       |         |         |        |           |          |               |       |          |        |                |             |          |              |
| Phagosome                                              |            | 28                    | 27   | 10             |     | 9            | 1      |         |          |         |       |                  | 7    |                |        | 1         | 1           |        |         |       | 1       |         |        |           |          |               |       |          |        |                |             |          |              |
| MAPK signaling pathway                                 |            | 28                    | 21   | 7              |     | 6            | 2      |         |          |         |       |                  | 8    | 1              | 1      |           | 1           |        |         |       |         |         |        |           |          |               |       |          |        |                |             |          |              |
| Spliceosome                                            |            | 27                    | 17   | 3              | 3   | 1            | 5      |         |          |         | 2     | 1                | 12   |                | 4      | 2         | 1           | 1      |         |       |         |         |        |           |          |               |       |          |        |                |             |          |              |
| Regulation of actin cytoskeleton                       |            | 26                    | 24   | 8              |     | 7            | 2      |         |          |         |       |                  | 5    | 1              | 1      | 1         | 1           |        |         |       |         |         |        |           |          |               |       |          |        |                |             |          |              |
| Alzheimer's disease                                    |            | 26                    | 22   | 6              | 3   | 4            | 8      | 1       |          |         |       |                  | 5    |                |        | 1         |             |        |         |       |         |         |        |           |          |               |       |          |        |                |             |          |              |
| Huntington's disease                                   |            | 26                    | 22   | 2              | 5   | 3            | 9      | 1       |          |         |       |                  | 5    | 1              |        | 2         |             | 1      |         |       |         |         |        |           |          |               |       |          |        |                |             |          |              |
| Purine metabolism                                      |            | 26                    | 22   | 5              | 4   | 7            | 4      |         |          |         |       |                  | 7    |                |        | 1         |             |        | 1       |       |         |         |        |           |          |               |       |          |        |                | 1           |          |              |
| Focal adhesion                                         |            | 26                    | 21   | 7              |     | 9            | 2      | 1       |          |         |       |                  | 9    |                | 2      |           | 2           |        |         |       |         | 1       |        | 1         |          |               |       |          |        |                |             |          |              |
| Chemokine signaling pathway                            |            | 24                    | 23   | 12             | 2   | 2            | 3      |         |          |         |       |                  | 4    |                |        |           | 2           |        |         |       |         |         |        |           |          |               |       |          |        |                |             |          |              |
| Pyrimidine metabolism                                  |            | 24                    | 20   | 6              | 4   | 6            | 3      |         |          |         |       |                  | 6    |                |        | 1         |             |        |         |       | 1       |         |        |           |          |               |       |          |        |                | 1           |          |              |
| Tuberculosis                                           |            | 24                    | 20   | 6              |     | 7            |        |         |          |         |       |                  | 9    | 1              |        | 1         | 3           |        |         |       |         |         |        |           |          |               |       |          |        |                |             |          |              |
| Influenza A                                            |            | 23                    | 21   | 8              | 1   | 4            | 2      |         |          |         | 1     |                  | 5    | 1              |        |           | 1           |        |         |       | 1       |         |        |           |          |               |       |          |        |                |             |          |              |
| Oxidative phosphorylation                              |            | 23                    | 20   | 5              | 3   | 3            | 8      | 1       |          |         |       |                  | 5    |                |        | 2         | 1           |        | 1       |       |         |         |        |           |          |               |       |          |        |                |             |          |              |
| Leukocyte transendothelial migration                   |            | 22                    | 18   | 9              | 1   | 7            | 1      |         |          |         |       |                  | 6    | 1              |        |           | 1           |        |         |       |         |         |        |           |          |               |       |          |        |                |             |          |              |
| Cytokine-cytokine receptor interaction                 |            | 21                    | 19   | 6              | 1   | 8            |        |         |          |         |       |                  | 4    | 1              |        |           |             |        |         |       |         | 1       |        |           |          |               |       |          |        |                |             |          |              |
| Osteoclast differentiation                             |            | 21                    | 18   | 8              |     | 6            |        |         |          |         |       |                  | 5    | 1              |        |           | 1           |        |         |       |         |         |        |           |          |               |       |          |        |                |             |          |              |
| Cell adhesion molecules (CAMs)                         |            | 20                    | 14   | 6              |     | 7            | 1      |         |          |         |       |                  | 7    | 2              |        |           | 1           |        |         |       |         |         |        |           |          |               |       |          |        |                |             |          |              |
| Insulin signaling pathway                              |            | 19                    | 13   | 9              | 1   | 2            | 1      |         |          |         |       |                  | 6    |                | 1      |           |             |        | 1       |       |         |         |        |           |          |               |       |          |        |                |             | 1        |              |
| mRNA surveillance pathway                              |            | 19                    | 13   | 6              | 2   | 1            | 2      |         |          |         |       |                  | 8    | 2              | 1      | 2         |             |        |         |       |         |         |        |           |          |               |       |          |        |                | 1           |          |              |
| Ribosome biogenesis in eukaryotes                      |            | 19                    | 13   | 5              | 1   | 3            | 2      |         |          |         |       |                  | 7    | 1              |        |           |             |        |         |       |         |         |        |           |          |               |       |          |        |                | 2           |          |              |
| Wnt signaling pathway                                  |            | 18                    | 14   | 5              |     | 4            | 2      |         |          |         |       |                  | 4    | 2              |        | 1         |             |        |         |       |         |         |        |           |          |               |       |          |        |                |             |          |              |
| Neuroactive ligand-receptor interaction                |            | 18                    | 12   | 3              | 1   | 3            | 1      |         |          |         |       |                  | 7    | 1              |        |           |             |        |         | 2     | 1       |         |        |           |          |               |       | 1        |        |                |             |          |              |
| RNA degradation                                        |            | 18                    | 12   | 4              | 3   | 2            | 1      |         |          |         |       | 1                | 7    |                | 1      | 2         |             |        |         |       |         |         |        |           |          |               |       |          |        |                |             |          |              |
| Tight junction                                         |            | 18                    | 12   | 7              |     | 3            | 2      |         |          |         |       |                  | 9    | 2              | 1      |           | 2           |        |         |       |         |         |        |           |          |               |       |          |        |                |             |          |              |
| Calcium signaling pathway                              |            | 17                    | 16   | 4              | 2   | 1            | 2      |         | 1        |         |       |                  | 4    |                |        |           | 1           |        |         |       | 1       |         |        |           |          |               | 1     |          |        |                |             |          |              |
| Parkinson's disease                                    |            | 17                    | 15   | 2              | 3   | 3            | 7      | 1       |          |         |       |                  | 2    |                |        | 1         |             |        | 1       |       |         |         |        |           |          |               |       |          |        |                |             |          |              |
| Ubiquitin mediated proteolysis                         |            | 17                    | 12   | 11             | 1   |              |        |         |          |         |       |                  | 7    | 2              | 1      | 1         | 1           |        |         |       | 1       |         |        |           |          |               |       |          |        |                |             |          |              |
| Measles                                                |            | 16                    | 16   | 6              | 1   | 4            |        |         |          |         | 1     |                  | 4    | 1              | 1      |           | 1           |        |         |       |         |         |        |           |          |               |       |          |        |                |             |          |              |
| Hepatitis C                                            |            | 16                    | 11   | 7              |     | 2            |        |         |          |         | 1     |                  | 6    |                |        |           | 2           |        | 1       |       |         |         |        |           |          |               |       |          |        |                |             |          |              |
| Cell cycle                                             |            | 16                    | 10   | 10             | 1   | 1            |        |         |          |         |       |                  | 4    | 1              |        | 1         |             | 1      |         | 1     |         |         |        |           |          |               |       |          |        |                |             |          |              |
| Phosphatidylinositol signaling system                  |            | 16                    | 10   | 8              |     | 1            |        |         | 1        |         |       |                  | 5    | 1              |        |           | 1           |        |         | 1     |         |         |        |           |          |               |       |          |        |                |             |          |              |
| Fc gamma R-mediated phagocytosis                       |            | 15                    | 16   | 8              |     | 2            | 1      |         |          |         |       |                  |      |                |        |           |             |        |         |       |         |         |        |           |          |               |       |          |        |                |             |          |              |
| Natural killer cell mediated cytotoxicity              |            | 15                    | 14   | 3              | 1   | 5            | 1      |         |          |         |       |                  | 4    | 1              |        |           | 1           |        |         |       | 1       |         |        |           |          |               |       |          |        |                |             |          |              |
| Systemic lupus erythematosus                           |            | 15                    | 14   | 1              | 1   | 4            | 3      |         |          |         |       |                  | 3    | 1              |        |           |             |        |         |       |         |         |        |           |          |               |       |          |        |                |             |          |              |
| Dopaminergic synapse                                   |            | 15                    | 12   | 7              |     | 3            |        |         |          |         |       |                  | 3    | 1              |        |           |             |        |         |       |         |         |        |           |          |               |       |          |        |                |             |          |              |
| Antigen processing and presentation                    |            | 15                    | 11   | 4              |     | 3            | 1      |         |          |         |       |                  | 4    | 1              |        | 1         |             |        |         |       |         |         |        |           |          |               |       |          |        |                |             |          |              |
| Small cell lung cancer                                 |            | 15                    | 11   | 5              |     | 3            | 1      | 1       |          |         |       |                  | 5    |                |        |           | 1           |        |         |       |         |         |        | 1         |          |               |       |          |        |                |             |          |              |
| Apoptosis                                              |            | 15                    | 10   | 5              |     | 3            |        |         |          |         |       |                  | 8    | 2              |        |           | 1           |        |         |       |         |         |        |           |          |               |       |          |        |                |             |          |              |
| Toxoplasmosis                                          |            | 15                    | 10   | 6              |     | 3            |        | 1       |          |         |       |                  | 6    |                |        |           | 1           |        |         |       |         |         |        | 1         |          |               |       |          |        |                |             |          |              |
| Rheumatoid arthritis                                   |            | 14                    | 12   | 5              |     | 5            |        |         |          |         |       |                  | 5    |                | 1      | 1         | 2           |        |         |       |         |         |        |           |          |               |       |          |        |                |             |          |              |
| Arrhythmogenic right ventricular cardiomyopathy (ARVC) |            | 14                    | 11   | 5              |     | 2            | 1      |         |          |         |       |                  | 3    |                |        |           |             |        |         |       |         |         |        |           |          |               |       |          |        |                |             |          |              |
| Jak-STAT signaling pathway                             |            | 14                    | 11   | 4              |     | 4            |        |         |          |         |       |                  | 3    | 1              | 1      |           |             |        |         |       |         |         |        |           |          |               |       |          |        |                |             |          |              |
| Chagas disease (American trypanosomiasis)              |            | 14                    | 10   | 4              |     | 4            |        |         |          |         |       |                  | 5    |                |        |           | 1           |        |         | 1     |         |         |        |           |          |               |       |          |        |                |             |          |              |
| Inositol phosphate metabolism                          |            | 14                    | 9    | 7              | 1   | 1            |        |         | 1        |         |       |                  | 4    | 1              |        |           | 1           |        |         | 1     |         |         |        |           |          |               |       |          |        |                |             |          |              |



[illegible]
