# Supplementary material for: Epigenetic transgenerational inheritance of somatic transcriptomes and epigenetic control regions
Source: PubMed Central journal article supplement (PMC3491419; doi:10.1186/gb-2012-13-10-r91), 2012-10-03

### Microarray Quality Control

**A**

F3 Vin 11 Tissues Raw

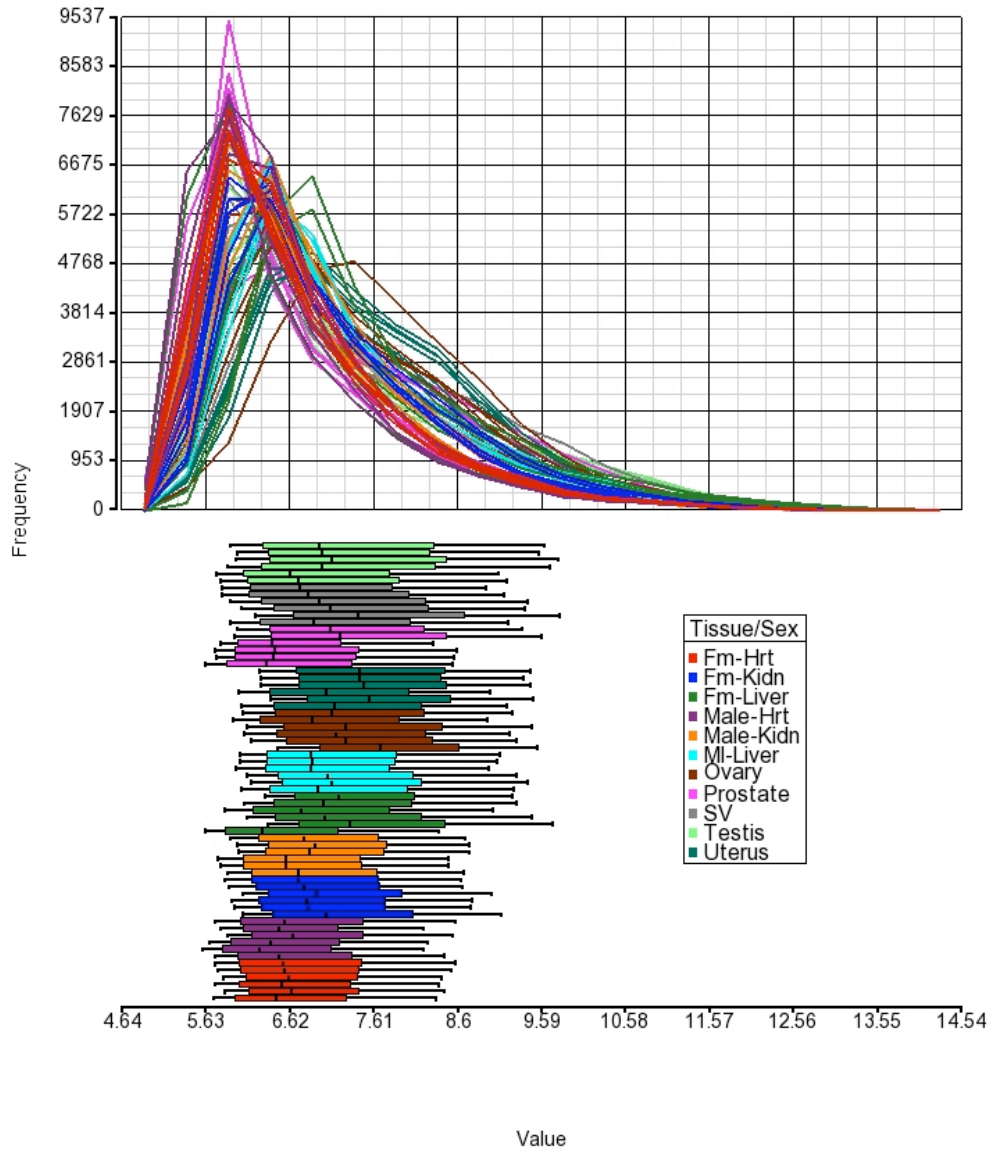

Supplemental Figure S1

Microarray Quality Control

**B** Female Heart

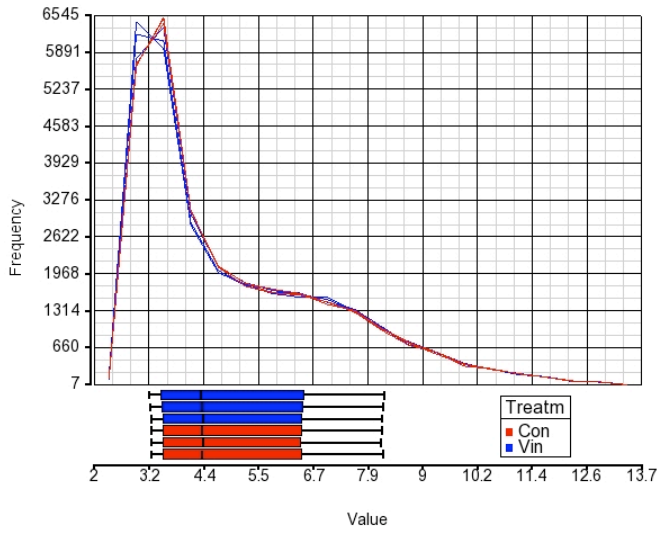

**C** Female Kidney

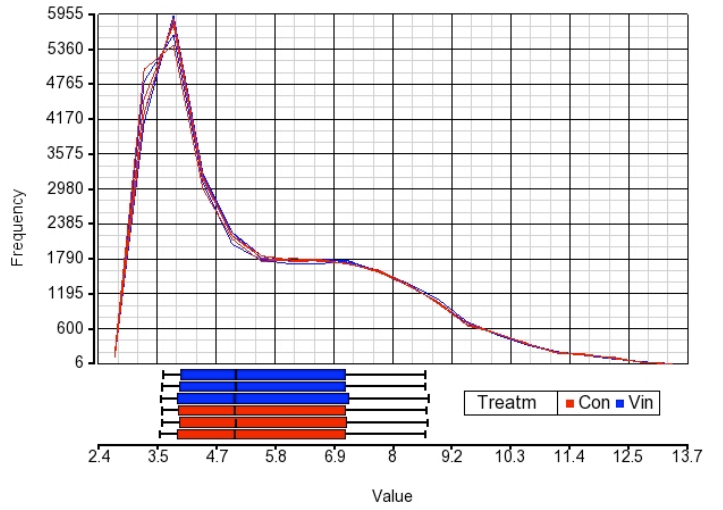

**D** Female Liver

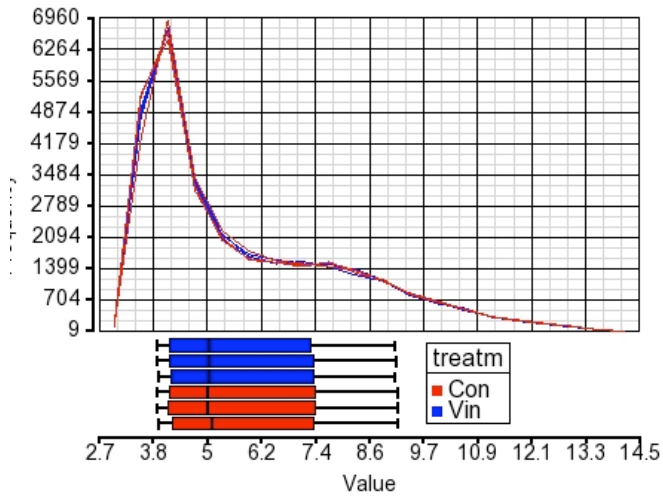

**E** Female Ovary

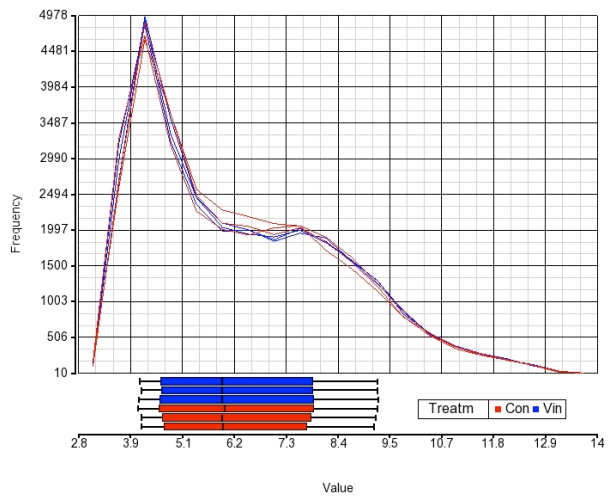

**F** Female Uterus

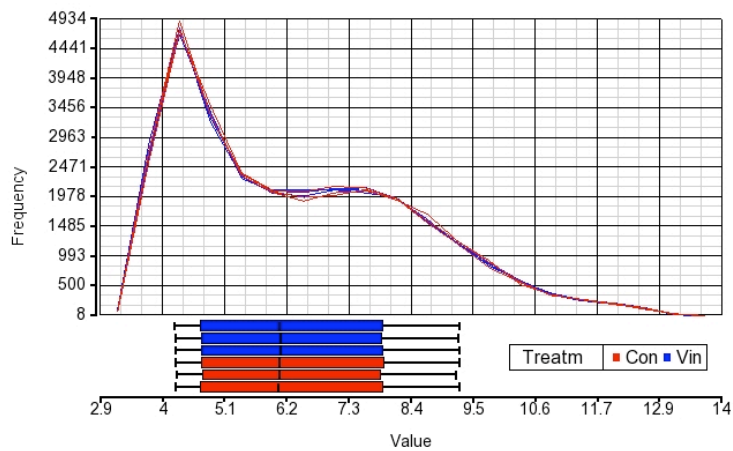

Supplemental Figure S1

**G** Male Heart

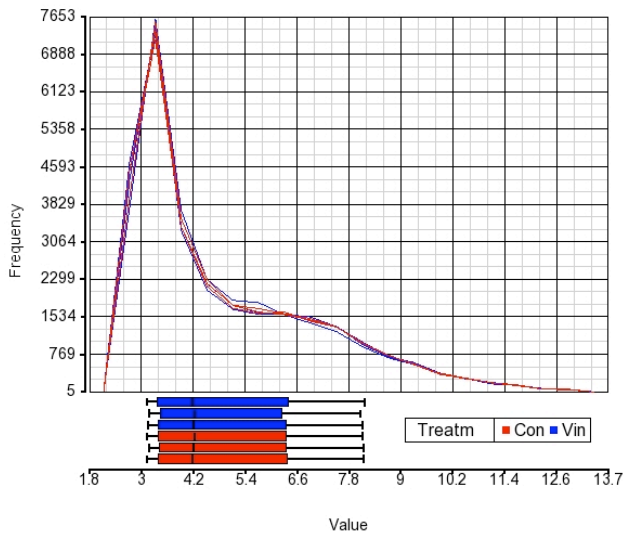

**H** Male Kidney

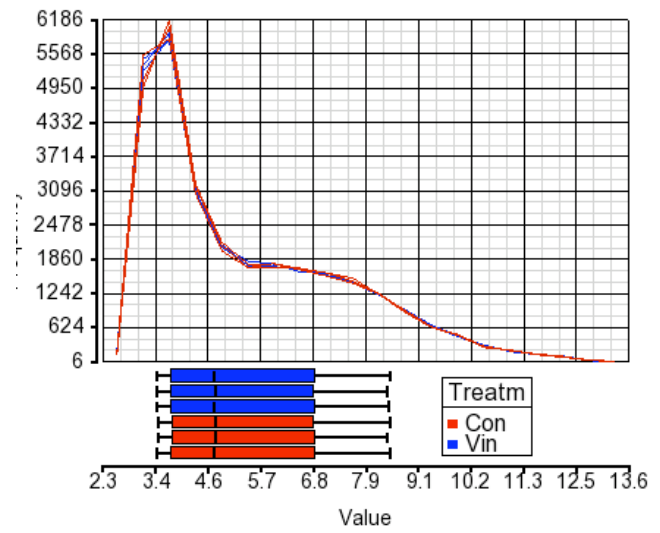

**I** Male Liver

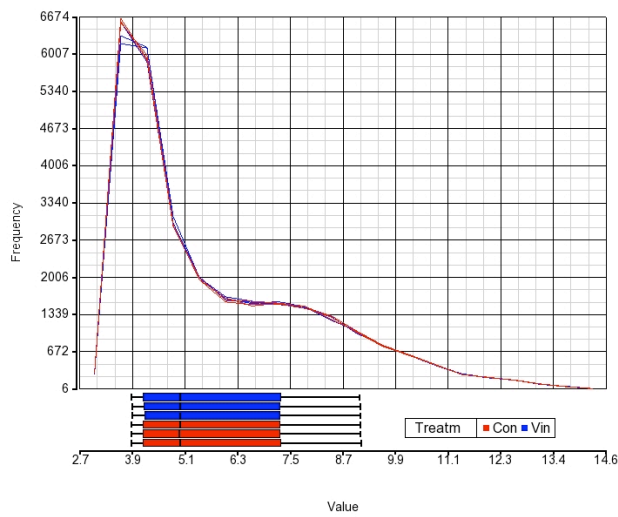

**J** Male Prostate

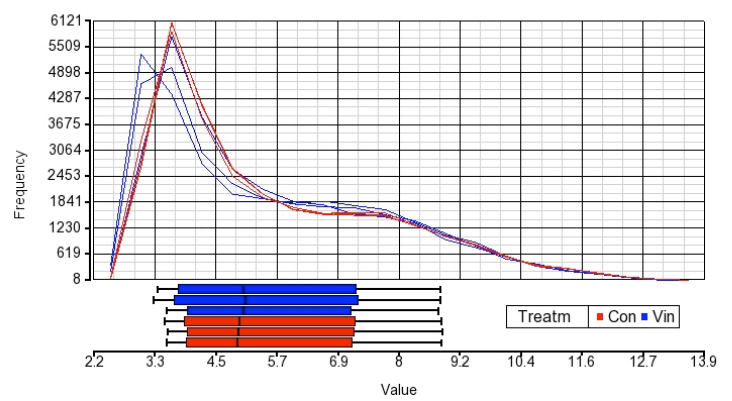

**K** Male SV

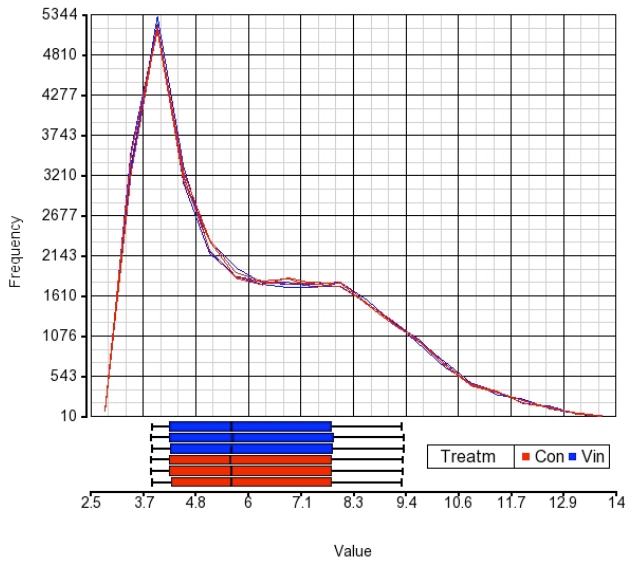

**L** Male Testis

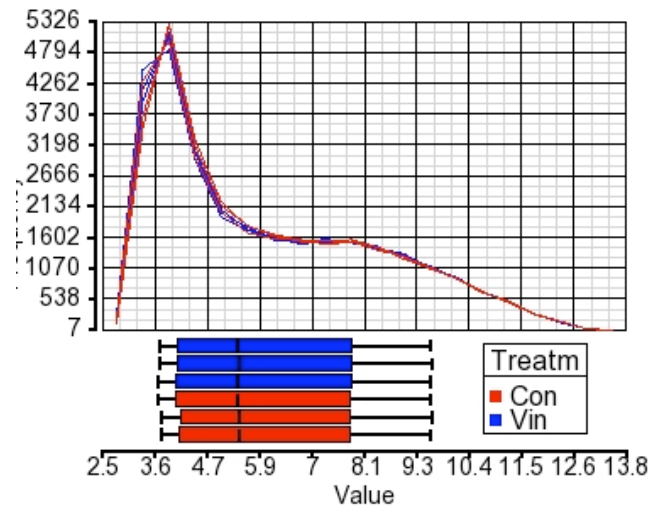

Supplement: gb-2012-13-10-r91-S1.pdf [file gb-2012-13-10-r91-S1.pdf]
