# Supplementary material for: Epigenetic transgenerational inheritance of somatic transcriptomes and epigenetic control regions
Source: PubMed Central journal article supplement (PMC3491419; doi:10.1186/gb-2012-13-10-r91), 2012-10-03

### Module Networks

#### A Female Turquoise

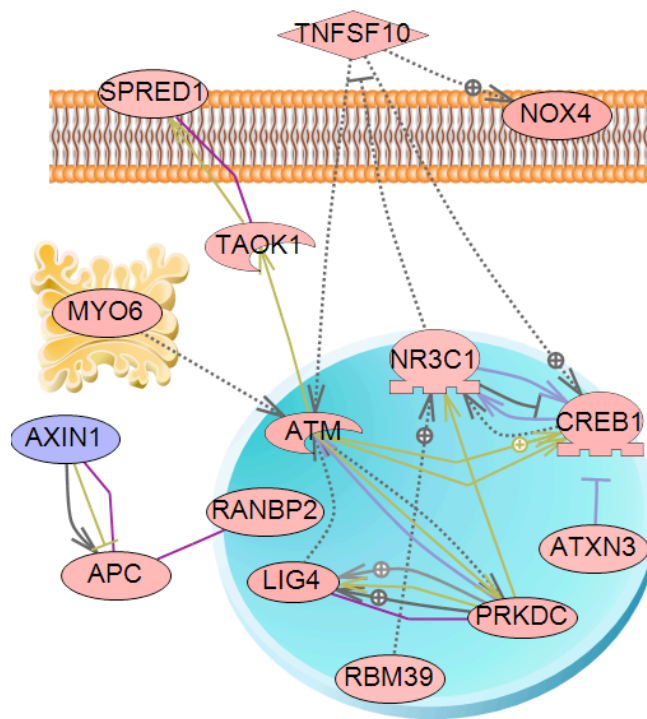

#### B Male Yellow

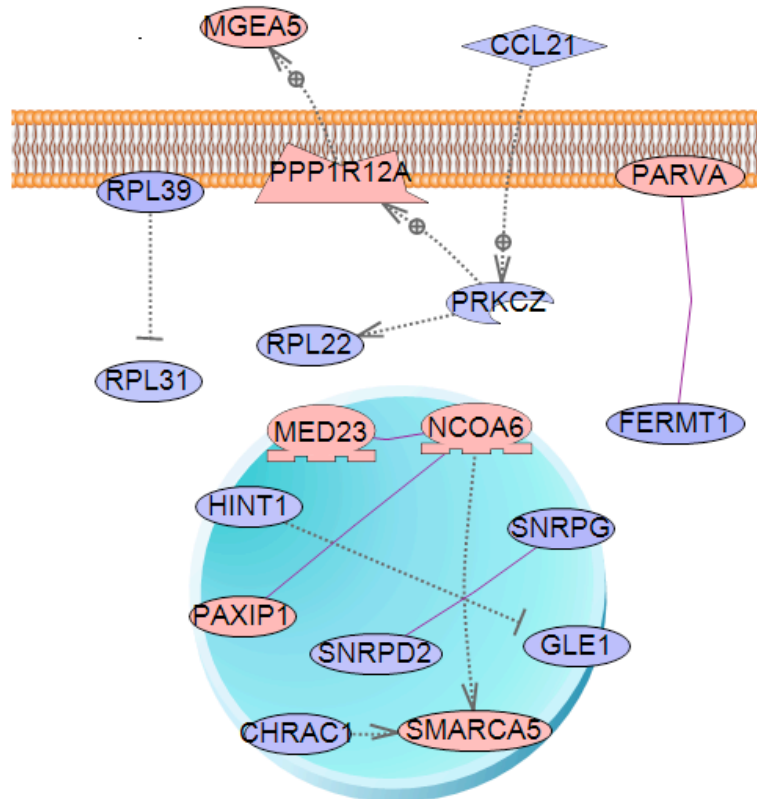

Supplemental Figure S3 cont.

**C Male Brown**

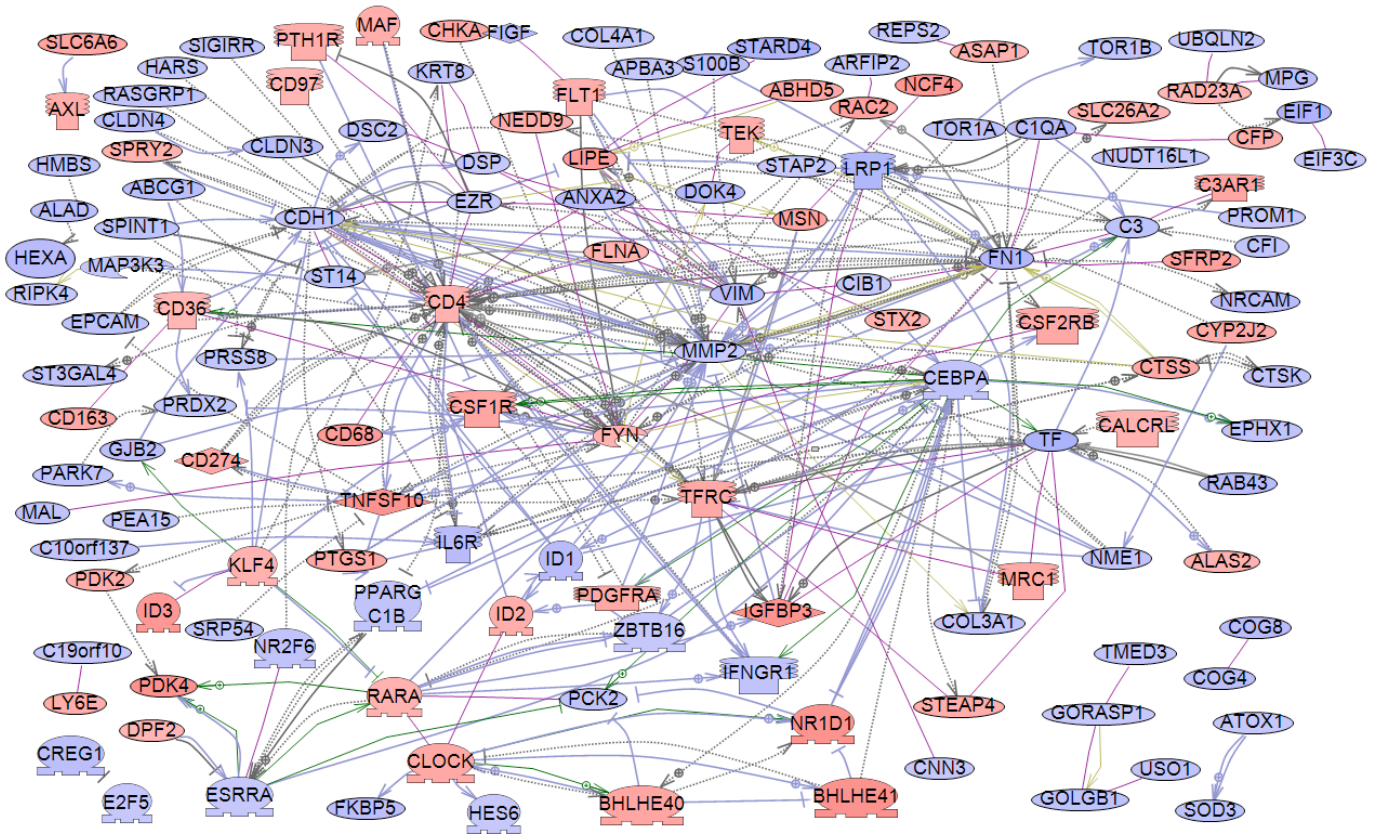

**D Male Turquoise**

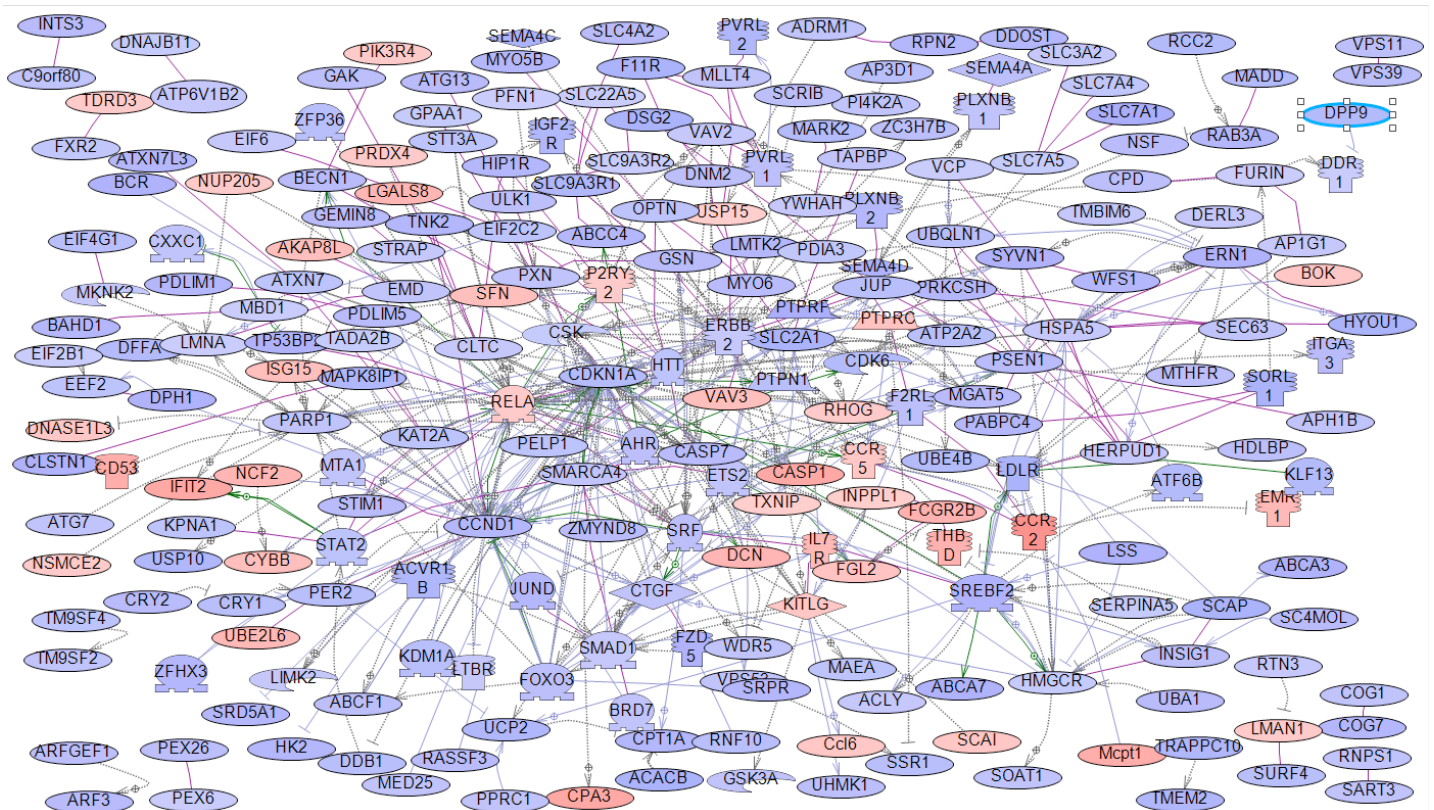

Supplement: gb-2012-13-10-r91-S3.pdf [file gb-2012-13-10-r91-S3.pdf]
