# Supplementary material for: Epigenetic transgenerational inheritance of somatic transcriptomes and epigenetic control regions
Source: PubMed Central journal article supplement (PMC3491419; doi:10.1186/gb-2012-13-10-r91), 2012-10-03

**Tissue Gene Networks**

**A Female Heart**

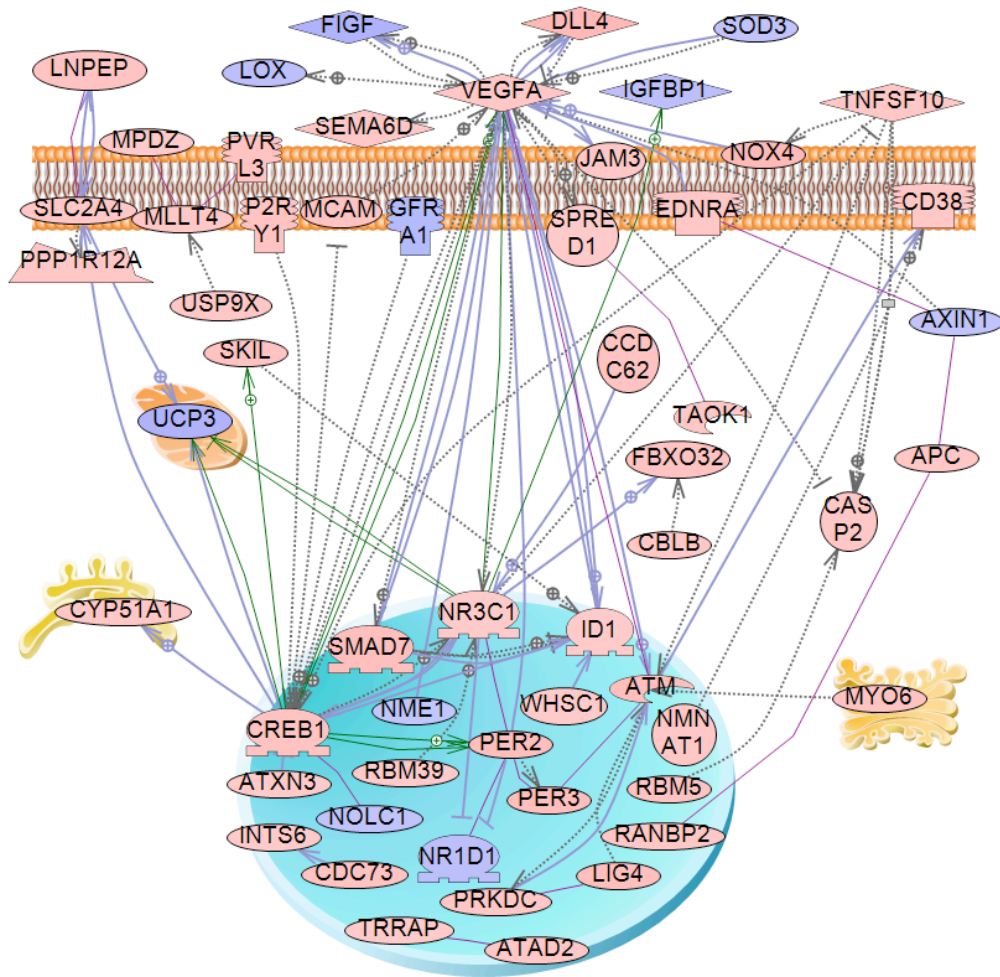

**B Female Kidney**

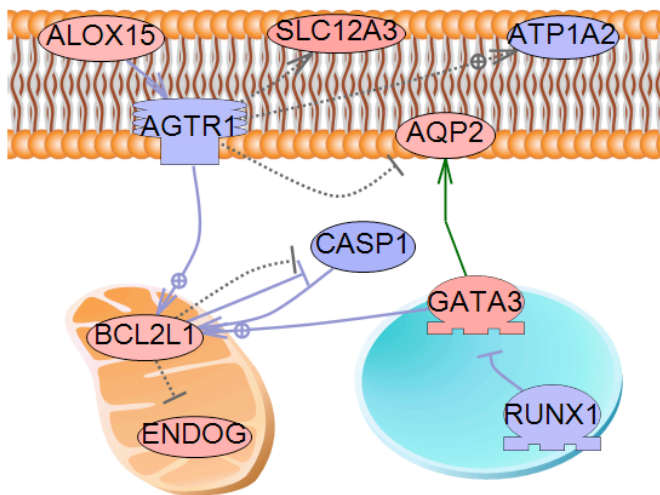

**C Female Ovary**

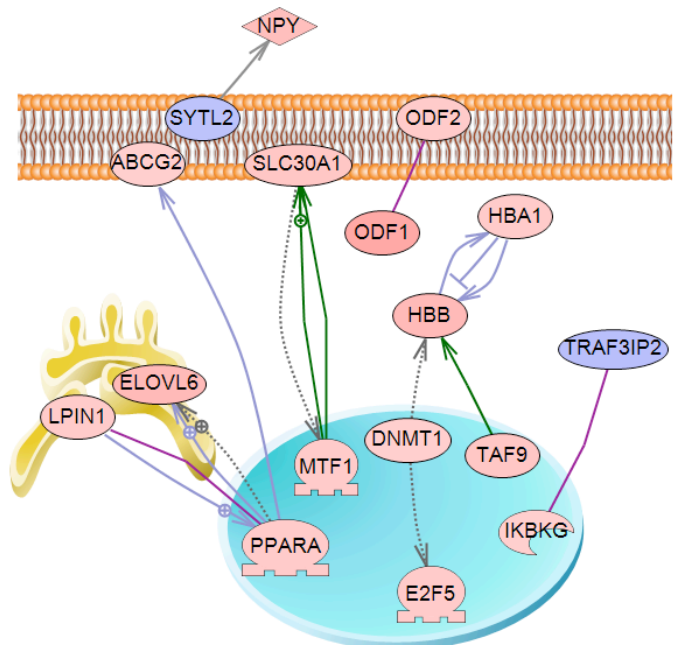

Supplemental Figure S4 cont.

**D** Female Uterus

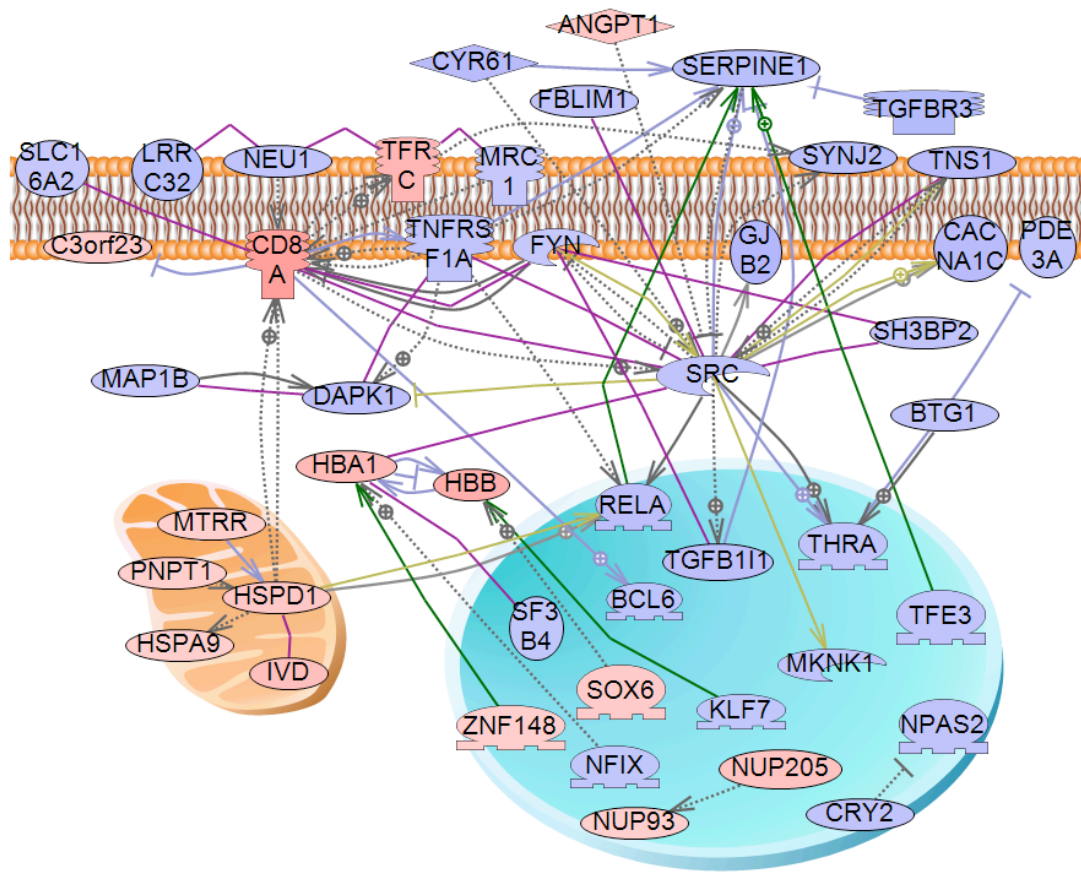

**E** Male Heart

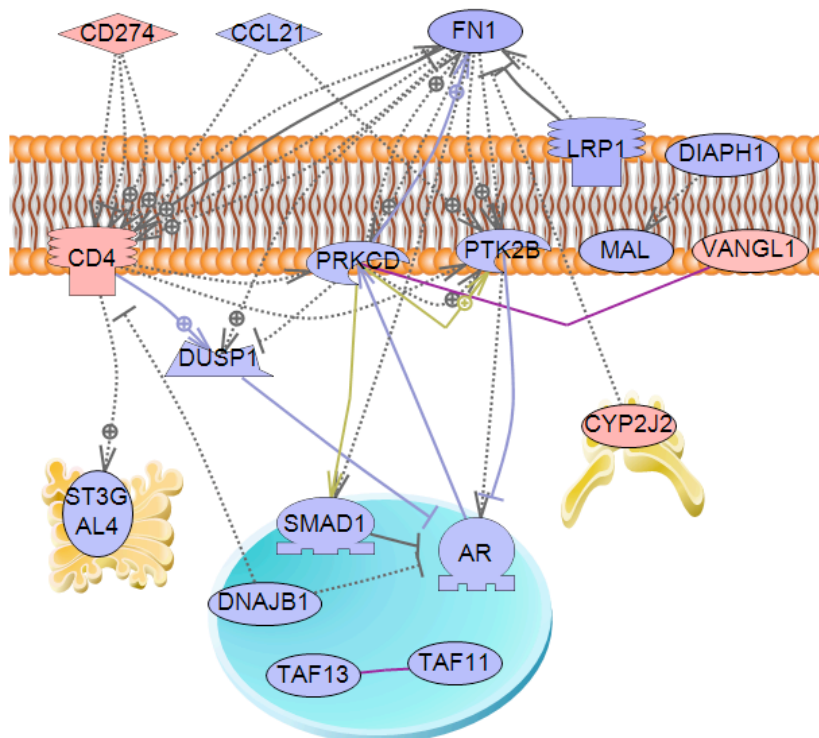

Supplemental Figure S4 cont.

**F** Male Kidney

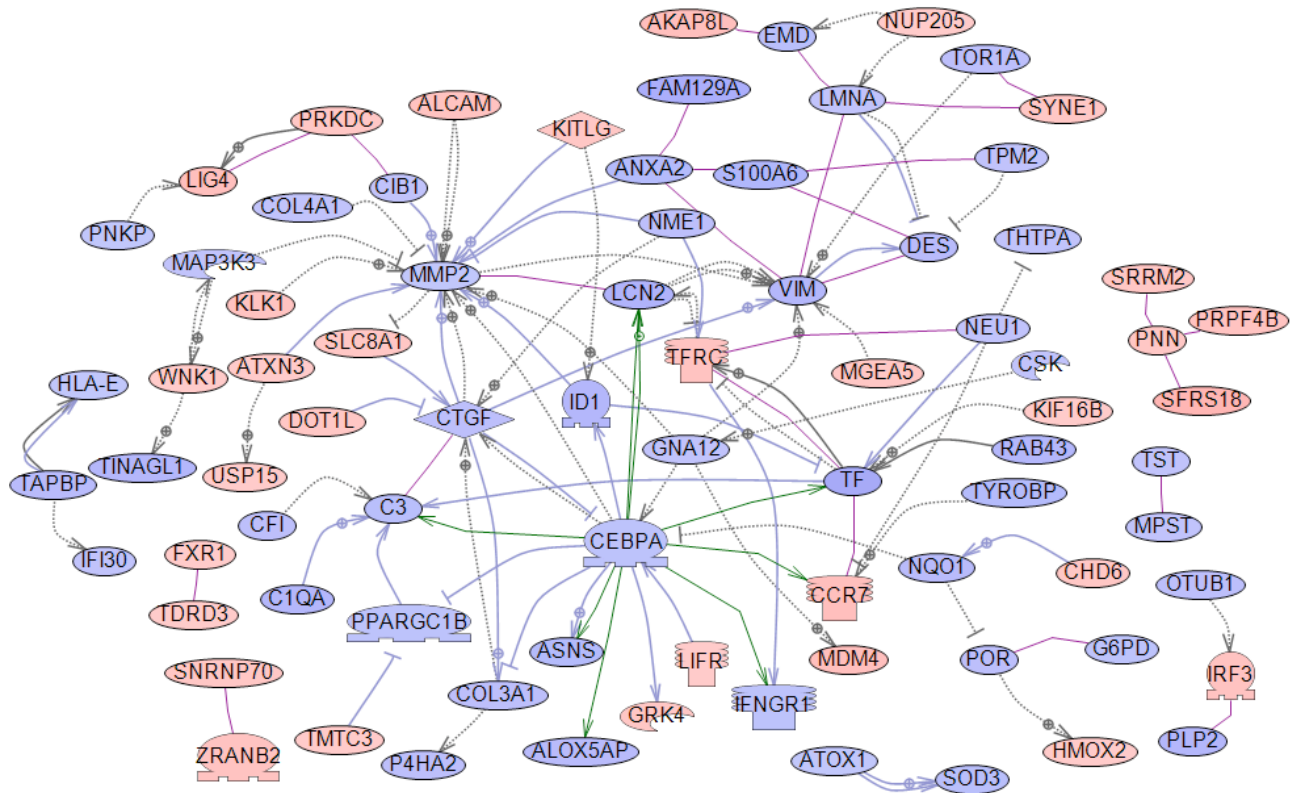

**G** Male Liver

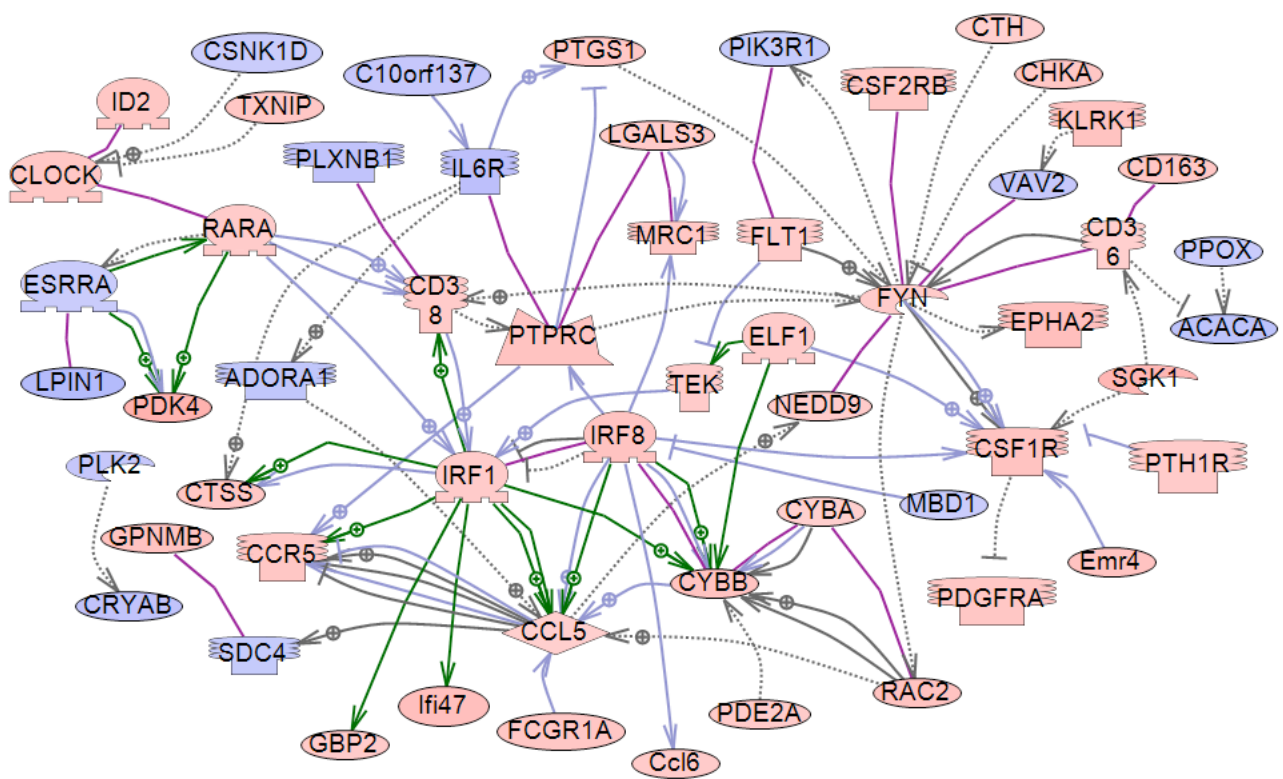

Supplement: gb-2012-13-10-r91-S4.pdf [file gb-2012-13-10-r91-S4.pdf]
