# Supplementary material for: Epigenetic transgenerational inheritance of somatic transcriptomes and epigenetic control regions
Source: PubMed Central journal article supplement (PMC3491419; doi:10.1186/gb-2012-13-10-r91), 2012-10-03
Supplement: gb-2012-13-10-r91-S5.pdf [file gb-2012-13-10-r91-S5.pdf]

Supplemental Table S1. Differentially Expressed Genes in F3 Generation Somatic Tissues

## A. Female Heart

| Gene Symbol               | RefSeq/GenBank/<br>Ensemble Number | Affymetrix<br>Probeset ID | V/C         | Mean<br>Diff. | k.in        | Mod          | Gene Title                                                                                |
|---------------------------|------------------------------------|---------------------------|-------------|---------------|-------------|--------------|-------------------------------------------------------------------------------------------|
| <b>APOPTOSIS</b>          |                                    |                           |             |               |             |              |                                                                                           |
| Casp2                     | NM_022522                          | 10855020                  | 1.24        | 39            | 1.8         | blue         | <b>caspase 2</b>                                                                          |
| Tnfrsf21                  | NM_001108207                       | 10926740                  | 0.78        | -27           | 0.0         | grey         | tumor necrosis factor receptor superfamily, member 21                                     |
| Tnfsf10                   | NM_145681                          | 10814528                  | 1.23        | 51            | 3.9         | turq         | tumor necrosis factor (ligand) superfamily, member 10                                     |
| Tnrc6b                    | NM_138845                          | 10897821                  | 1.22        | 37            | 0.0         | grey         | trinucleotide repeat containing 6B                                                        |
| <b>CELL CYCLE</b>         |                                    |                           |             |               |             |              |                                                                                           |
| Ccn1                      | NM_053662                          | 10823508                  | 1.33        | 93            | 9.9         | blue         | cyclin L1                                                                                 |
| <b>Ccn12</b>              | <b>NM_001013094</b>                | <b>10874708</b>           | <b>1.27</b> | <b>111</b>    | <b>16.8</b> | <b>blue</b>  | <b>cyclin L2</b>                                                                          |
| <b>Ccnt2</b>              | <b>NM_001107171</b>                | <b>10767280</b>           | <b>1.48</b> | <b>146</b>    | <b>14.2</b> | <b>blue</b>  | <b>cyclin T2</b>                                                                          |
| Cdc73                     | NM_001024769                       | 10768305                  | 1.30        | 100           | 6.1         | turq         | cell division cycle 73, Paf1/RNA polymerase II complex component, homolog (S. cerevisiae) |
| <b>CYTOSKELETON-ECM</b>   |                                    |                           |             |               |             |              |                                                                                           |
| Cldn16                    | NM_131905                          | 10755027                  | 0.74        | -10           | 0.0         | grey         | claudin 16                                                                                |
| Eml4                      | NM_001108008                       | 10882543                  | 1.23        | 61            | 5.5         | turq         | echinoderm microtubule associated protein like 4                                          |
| Jam3                      | NM_001004269                       | 10915910                  | 1.23        | 35            | 2.1         | turq         | junctional adhesion molecule 3                                                            |
| Macf1                     | NM_001135758                       | 10879555                  | 1.36        | 132           | 10.2        | turq         | microtubule-actin crosslinking factor 1                                                   |
| <b>Mcam</b>               | <b>NM_023983</b>                   | <b>10909446</b>           | <b>1.35</b> | <b>35</b>     | <b>1.8</b>  | <b>l-grn</b> | <b>melanoma cell adhesion molecule</b>                                                    |
| Myh7b                     | NM_001107794                       | 10841367                  | 1.36        | 11            | 3.3         | blue         | myosin, heavy chain 7B, cardiac muscle, beta                                              |
| Myo6                      | ENSRNOT00000016428                 | 10911882                  | 1.29        | 68            | 3.6         | turq         | myosin VI                                                                                 |
| Myo9a                     | NM_134335                          | 10910577                  | 1.22        | 45            | 12.5        | turq         | myosin IXA                                                                                |
| Pcdh7                     | NM_001004087                       | 10776978                  | 1.50        | 37            | 6.2         | blue         | protocadherin 7                                                                           |
| RGD1564809                | ENSRNOT00000038184                 | 10869125                  | 1.25        | 24            | 3.0         | red          | similar to fibronectin type 3 and SPRY domain-containing protein                          |
| Smchd1                    | ENSRNOT00000019359                 | 10930435                  | 1.24        | 67            | 7.2         | brwn         | structural maintenance of chromosomes flexible hinge domain containing 1                  |
| Ttn                       | ENSRNOT00000032008                 | 10846386                  | 1.48        | 14            | 0.0         | grey         | titin                                                                                     |
| Zfc3h1                    | ENSRNOT00000058444                 | 10895458                  | 1.41        | 97            | 12.3        | turq         | zinc finger, C3H1-type containing                                                         |
| <b>DEVELOPMENT</b>        |                                    |                           |             |               |             |              |                                                                                           |
| Apc                       | NM_012499                          | 10800844                  | 1.23        | 47            | 5.5         | turq         | adenomatous polyposis coli                                                                |
| <b>Atm</b>                | <b>NM_001106821</b>                | <b>10917385</b>           | <b>1.36</b> | <b>46</b>     | <b>21.3</b> | <b>turq</b>  | <b>ataxia telangiectasia mutated homolog (human)</b>                                      |
| Atxn3                     | NM_021702                          | 10891818                  | 1.22        | 32            | 8.0         | turq         | ataxin 3                                                                                  |
| Bbs10                     | NM_001109286                       | 10895394                  | 1.29        | 17            | 6.4         | turq         | Bardet-Biedl syndrome 10                                                                  |
| Diaph2                    | ENSRNOT00000034461                 | 10934829                  | 1.29        | 42            | 2.1         | brwn         | diaphanous homolog 2 (Drosophila)                                                         |
| Dmd                       | NM_012698                          | 10933819                  | 1.26        | 34            | 0.0         | grey         | dystrophin                                                                                |
| <b>Dpy19l4</b>            | <b>ENSRNOT00000037869</b>          | <b>10875464</b>           | <b>1.29</b> | <b>53</b>     | <b>16.8</b> | <b>turq</b>  | <b>dpy-19-like 4 (C. elegans)</b>                                                         |
| Emcn                      | NM_001004228                       | 10819305                  | 1.32        | 106           | 0.0         | grey         | endomucin                                                                                 |
| LOC686314                 | ENSRNOT00000040697                 | 10799893                  | 1.39        | 14            | 0.0         | grey         | similar to dachshund b                                                                    |
| LOC687994                 | ENSRNOT00000030501                 | 10867109                  | 1.20        | 47            | 5.1         | turq         | similar to 82-kD FMRP Interacting Protein (chr5)                                          |
| LOC687994                 | ENSRNOT00000030501                 | 10736070                  | 1.25        | 72            | 9.8         | turq         | similar to 82-kD FMRP Interacting Protein (chr10)                                         |
| Nav3                      | NM_001191782                       | 10902290                  | 1.81        | 18            | 2.4         | turq         | neuron navigator 3                                                                        |
| Ophn1                     | NM_001107848                       | 10938556                  | 1.36        | 39            | 0.0         | grey         | oligophrenin 1                                                                            |
| Pcp4l1                    | NM_001126093                       | 10769812                  | 1.34        | 17            | 2.9         | blue         | Purkinje cell protein 4-like 1                                                            |
| Per2                      | NM_031678                          | 10929842                  | 1.38        | 20            | 1.0         | mgnt         | period circadian protein homolog 2 (Drosophila)                                           |
| Per3                      | NM_023978                          | 10881861                  | 1.40        | 43            | 0.0         | grey         | period circadian protein homolog 3 (Drosophila)                                           |
| Rapgef5                   | NM_001047915                       | 10887774                  | 1.39        | 49            | 0.9         | l-cn         | Rap guanine nucleotide exchange factor (GEF) 5                                            |
| Rttm                      | NM_001170436                       | 10803060                  | 1.28        | 16            | 5.6         | blue         | rotatin                                                                                   |
| Sdccag1                   | NM_001170586                       | 10890274                  | 1.25        | 39            | 11.9        | turq         | serologically defined colon cancer antigen 1 (chr6)                                       |
| <b>Sdccag1</b>            | <b>NM_001170586</b>                | <b>10719956</b>           | <b>1.23</b> | <b>54</b>     | <b>18.0</b> | <b>turq</b>  | <b>serologically defined colon cancer antigen 1 (chr1)</b>                                |
| Sema6d                    | NM_001107768                       | 10839327                  | 1.26        | 15            | 0.0         | grey         | sema domain, transmembrane domain (TM), and cytoplasmic domain, (semaphorin) 6D           |
| Setx                      | ENSRNOT00000017984                 | 10834908                  | 1.24        | 91            | 6.7         | turq         | senataxin                                                                                 |
| Skil                      | ENSRNOT00000013191                 | 10822637                  | 1.35        | 66            | 3.7         | brwn         | SKI-like oncogene                                                                         |
| Spata5                    | NM_001108549                       | 10815032                  | 1.22        | 23            | 6.4         | turq         | spermatogenesis associated 5                                                              |
| Trpm7                     | AF375874                           | 10849556                  | 1.25        | 118           | 14.7        | turq         | transient receptor potential cation channel, subfamily M, member 7                        |
| Whsc1                     | NM_001191552                       | 10704372                  | 1.21        | 22            | 7.8         | turq         | Wolf-Hirschhorn syndrome candidate 1 (human)                                              |
| <b>DNA REPAIR</b>         |                                    |                           |             |               |             |              |                                                                                           |
| Lig4                      | NM_001106095                       | 10789670                  | 1.40        | 81            | 15.7        | turq         | ligase IV, DNA, ATP-dependent                                                             |
| Rev1                      | NM_001108213                       | 10927538                  | 1.21        | 35            | 4.9         | blue         | REV1 homolog (S. cerevisiae)                                                              |
| <b>ELECTRON TRANSPORT</b> |                                    |                           |             |               |             |              |                                                                                           |
| Cyp2d5                    | NM_173304                          | 10905732                  | 0.81        | -11           | 0.0         | grey         | cytochrome P450, family 2, subfamily d, polypeptide 5                                     |
| Cyp51                     | NM_012941                          | 10853471                  | 1.25        | 141           | 1.7         | l-grn        | cytochrome P450, family 51                                                                |
| Tmx4                      | NM_001100529                       | 10850199                  | 1.26        | 138           | 13.8        | turq         | thioredoxin-related transmembrane protein 4                                               |
| Txndc16                   | ENSRNOT00000008372                 | 10782804                  | 1.21        | 25            | 3.2         | turq         | thioredoxin domain containing 16                                                          |
| Ucp3                      | NM_013167                          | 10709083                  | 0.59        | -15           | 0.0         | grey         | uncoupling protein 3 (mitochondrial, proton carrier)                                      |

| EPIGENETICS            |                     |                 |             |           |             |             |                                                                                                                          |
|------------------------|---------------------|-----------------|-------------|-----------|-------------|-------------|--------------------------------------------------------------------------------------------------------------------------|
| Chd6                   | NM_001107797        | 10851407        | 1.26        | 31        | 3.1         | turq        | chromodomain helicase DNA binding protein 6                                                                              |
| Hist1h2ai1             | NM_001013056        | 10798455        | 1.24        | 83        | 6.1         | turq        | histone cluster 1, H2ai-like                                                                                             |
| Jmjd1c                 | NM_001191719        | 10832831        | 1.21        | 49        | 0.0         | grey        | jumonji domain containing 1C                                                                                             |
| Mettl11b               | ENSRNOT00000039581  | 10769436        | 3.00        | 19        | 0.0         | grey        | methyltransferase like 11B                                                                                               |
| <b>Phf201</b>          | <b>NM_001025702</b> | <b>10896862</b> | <b>1.30</b> | <b>83</b> | <b>16.6</b> | <b>turq</b> | <b>PHD finger protein 20-like 1</b>                                                                                      |
| RGD1561065             | NM_001108253        | 10933017        | 1.20        | 17        | 0.0         | grey        | similar to mKIAA1111 protein                                                                                             |
| Syne1                  | AF452647            | 10717620        | 1.37        | 26        | 9.0         | blue        | spectrin repeat containing, nuclear envelope 1                                                                           |
| Tmf1                   | NM_053671           | 10864351        | 1.24        | 43        | 4.3         | brwn        | TATA element modulatory factor 1                                                                                         |
| Tnp1                   | NM_017056           | 10928844        | 2.15        | 18        | 13.2        | ylw         | transition protein 1                                                                                                     |
| GOLGI APPARATUS        |                     |                 |             |           |             |             |                                                                                                                          |
| Ap4e1                  | NM_001191742        | 10839483        | 1.23        | 28        | 8.1         | turq        | adaptor-related protein complex 4, epsilon 1 subunit                                                                     |
| Ogt                    | NM_017107           | 10934445        | 1.23        | 141       | 10.2        | blue        | O-linked N-acetylglucosamine (GlcNAc) transferase (UDP-N-acetylglucosamine:polypeptide-N-acetylglucosaminyl transferase) |
| GROWTH FACTORS         |                     |                 |             |           |             |             |                                                                                                                          |
| Dll4                   | NM_001107760        | 10838813        | 1.44        | 22        | 0.0         | grey        | delta-like 4 (Drosophila)                                                                                                |
| Figf                   | NM_031761           | 10937725        | 0.57        | -60       | 1.2         | gr-yel      | c-fos induced growth factor                                                                                              |
| Kng1                   | NM_012696           | 10751988        | 0.72        | -42       | 0.0         | grey        | kininogen 1                                                                                                              |
| Vegfa                  | NM_031836           | 10921772        | 1.27        | 136       | 3.1         | blue        | vascular endothelial growth factor A                                                                                     |
| IMMUNE RESPONSE        |                     |                 |             |           |             |             |                                                                                                                          |
| <b>Cd38</b>            | <b>NM_013127</b>    | <b>10777232</b> | <b>1.27</b> | <b>19</b> | <b>1.5</b>  | <b>l-cn</b> | <b>CD38 molecule</b>                                                                                                     |
| Cfh                    | BC089845            | 10768236        | 0.78        | -15       | 0.0         | grey        | complement factor H                                                                                                      |
| Clk4                   | NM_001013041        | 10733321        | 1.31        | 92        | 8.0         | blue        | CDC like kinase 4                                                                                                        |
| Fv1                    | NM_001014018        | 10706509        | 1.31        | 40        | 2.9         | blue        | Friend virus susceptibility 1                                                                                            |
| Pibf1                  | ENSRNOT00000036350  | 10781810        | 1.24        | 29        | 8.2         | turq        | progesterone immunomodulatory binding factor 1                                                                           |
| Sigirr                 | NM_001024887        | 10726691        | 1.31        | 25        | 1.6         | l-grn       | single immunoglobulin and toll-interleukin 1 receptor (TIR) domain                                                       |
| Tmpo                   | NM_012887           | 10901823        | 1.29        | 62        | 5.1         | blue        | thymopoietin                                                                                                             |
| Trim65                 | NM_001135714        | 10749124        | 1.21        | 12        | 0.8         | l-grn       | tripartite motif-containing 65                                                                                           |
| METABOLISM & TRANSPORT |                     |                 |             |           |             |             |                                                                                                                          |
| Aasdh                  | ENSRNOT00000002907  | 10772212        | 1.31        | 25        | 7.4         | blue        | aminoadipate-semialdehyde dehydrogenase                                                                                  |
| Arsk                   | NM_001047917        | 10820073        | 1.26        | 48        | 7.4         | turq        | arylsulfatase family, member K                                                                                           |
| Atad2                  | NM_001134879        | 10903864        | 1.25        | 15        | 2.4         | turq        | ATPase family, AAA domain containing 2                                                                                   |
| Atp6ap1l               | NM_001191843        | 10820308        | 0.68        | -14       | 0.0         | grey        | ATPase, H+ transporting, lysosomal accessory protein 1-like                                                              |
| Atp8a1                 | ENSRNOT00000041793  | 10772582        | 1.38        | 55        | 0.0         | grey        | ATPase, aminophospholipid transporter (APLT), class I, type 8A, member 1                                                 |
| Bche                   | NM_022942           | 10823678        | 1.51        | 50        | 7.8         | turq        | butyrylcholinesterase                                                                                                    |
| Cacna2d1               | NM_012919           | 10860374        | 1.32        | 32        | 0.0         | grey        | calcium channel, voltage-dependent, alpha2/delta subunit 1                                                               |
| Ces3                   | NM_133295           | 10931271        | 0.81        | -58       | 0.7         | red         | carboxylesterase 3                                                                                                       |
| Clcn5                  | NM_017106           | 10932584        | 1.25        | 34        | 0.0         | grey        | chloride channel 5                                                                                                       |
| Gba2                   | NM_001013091        | 10876396        | 1.22        | 15        | 4.6         | blue        | glucosidase beta 2                                                                                                       |
| Hlcs                   | ENSRNOT00000002291  | 10753247        | 0.80        | -21       | 0.0         | grey        | holocarboxylase synthetase (biotin-(propionyl-Coenzyme A-carboxylase (ATP-hydrolysing)) ligase)                          |
| Impdh1                 | NM_001108619        | 10861452        | 0.80        | -18       | 0.0         | grey        | IMP (inosine monophosphate) dehydrogenase 1                                                                              |
| Inpp4b                 | ENSRNOT00000024755  | 10810407        | 1.27        | 12        | 0.0         | grey        | inositol polyphosphate-4-phosphatase, type II                                                                            |
| Lox                    | NM_017061           | 10804463        | 0.76        | -19       | 1.5         | l-cn        | lysyl oxidase                                                                                                            |
| Mat2a                  | NM_134351           | 10863221        | 1.25        | 300       | 8.0         | turq        | methionine adenosyltransferase II, alpha (chr4)                                                                          |
| Mat2a                  | NM_134351           | 10767001        | 1.26        | 359       | 7.9         | turq        | methionine adenosyltransferase II, alpha (chr13)                                                                         |
| Mthfd2                 | NM_001109398        | 10863512        | 1.26        | 16        | 2.7         | turq        | methylenetetrahydrofolate dehydrogenase (NADP+ dependent) 2, methenyltetrahydrofolate cyclohydrolase                     |
| Nme1                   | NM_138548           | 10746276        | 0.83        | -33       | 0.0         | grey        | non-metastatic cells 1, protein (NM23A) expressed in                                                                     |
| Nmnat1                 | NM_001037556        | 10881771        | 1.24        | 15        | 0.7         | l-yel       | nicotinamide nucleotide adenyltransferase 1                                                                              |
| Nox4                   | NM_053524           | 10708485        | 1.45        | 28        | 1.8         | turq        | NADPH oxidase 4                                                                                                          |
| Nup1                   | NM_139091           | 10784307        | 1.30        | 43        | 0.0         | grey        | nucleoporin like 1                                                                                                       |
| Ogdhl                  | NM_001106062        | 10786774        | 1.23        | 11        | 0.0         | grey        | oxoglutarate dehydrogenase-like                                                                                          |
| Pigg                   | ENSRNOT00000033973  | 10775063        | 1.27        | 25        | 0.8         | l-cn        | phosphatidylinositol glycan anchor biosynthesis, class G                                                                 |
| Pus3                   | NM_001108134        | 10908990        | 1.27        | 20        | 6.6         | brwn        | pseudouridylate synthase 3                                                                                               |
| Pus1l                  | NM_001108699        | 10882238        | 1.26        | 22        | 0.0         | grey        | pseudouridylate synthase-like 1                                                                                          |
| Rpgr                   | NM_001127601        | 10932343        | 0.78        | -18       | 0.0         | grey        | retinitis pigmentosa GTPase regulator                                                                                    |
| Slc25a36               | ENSRNOT00000018433  | 10810551        | 1.21        | 84        | 6.1         | turq        | solute carrier family 25, member 36                                                                                      |
| Slc28a2                | NM_031664           | 10849275        | 1.28        | 74        | 0.0         | grey        | solute carrier family 28 (sodium-coupled nucleoside transporter), member 2                                               |
| Slc2a4                 | NM_012751           | 10744324        | 1.25        | 16        | 0.0         | grey        | solute carrier family 2 (facilitated glucose transporter), member 4                                                      |
| Slc30a6                | NM_001106708        | 10888565        | 1.24        | 34        | 8.2         | turq        | solute carrier family 30 (zinc transporter), member 6                                                                    |
| Slc36a4                | NM_001108127        | 10908111        | 1.28        | 32        | 5.1         | turq        | solute carrier family 36 (proton/amino acid symporter), member 4                                                         |
| Slc47a1                | NM_001014118        | 10743387        | 1.27        | 14        | 2.6         | turq        | solute carrier family 47, member 1                                                                                       |
| Slc4a7                 | NM_058211           | 10782533        | 1.33        | 40        | 0.0         | grey        | solute carrier family 4, sodium bicarbonate cotransporter, member 7                                                      |
| Slc5a3                 | NM_053715           | 10750282        | 1.36        | 43        | 0.0         | grey        | solute carrier family 5 (inositol transporters), member 3                                                                |
| Slc7a6os               | NM_139328           | 10810811        | 1.20        | 14        | 0.7         | l-yel       | solute carrier family 7, member 6 opposite strand                                                                        |
| Sod3                   | NM_012880           | 10777108        | 0.80        | -122      | 1.8         | turq        | superoxide dismutase 3, extracellular                                                                                    |
| Stard13                | NM_001109060        | 10756289        | 1.28        | 27        | 3.7         | blue        | StAR-related lipid transfer (START) domain containing 13                                                                 |
| Tnpo1                  | ENSRNOT00000020543  | 10820795        | 1.25        | 166       | 11.4        | turq        | transportin 1                                                                                                            |

|                                         |                           |                 |             |           |             |             |                                                                                                                                                        |
|-----------------------------------------|---------------------------|-----------------|-------------|-----------|-------------|-------------|--------------------------------------------------------------------------------------------------------------------------------------------------------|
| Ugt2b34                                 | NM_001191676              | 10771993        | 0.78        | -11       | 0.0         | grey        | UDP glucuronosyltransferase 2 family, polypeptide B34                                                                                                  |
| <b>PROTEOLYSIS</b>                      |                           |                 |             |           |             |             |                                                                                                                                                        |
| Adam19                                  | NM_001160228              | 10732966        | 0.82        | -13       | 0.0         | grey        | a disintegrin and metallopeptidase domain 19 (meltrin beta)                                                                                            |
| Adam4l1                                 | NM_001109277              | 10890962        | 1.31        | 12        | 0.0         | grey        | a disintegrin and metallopeptidase domain 4-like 1                                                                                                     |
| Lnpep                                   | NM_001113403              | 10718324        | 1.32        | 201       | 8.0         | turq        | leucyl/cystinyl aminopeptidase                                                                                                                         |
| <b>LOC360990</b>                        | <b>ENSRNOT00000038258</b> | <b>10774497</b> | <b>1.21</b> | <b>89</b> | <b>21.8</b> | <b>turq</b> | <b>similar to ubiquitin specific protease 34</b>                                                                                                       |
| Mmp11                                   | NM_012980                 | 10829630        | 0.83        | -14       | 0.0         | grey        | matrix metallopeptidase 11                                                                                                                             |
| Pcsk7                                   | NM_019246                 | 10909704        | 1.25        | 24        | 1.5         | l-grn       | proprotein convertase subtilisin/kexin type 7                                                                                                          |
| Prkrp1                                  | NM_001098793              | 10757555        | 1.23        | 21        | 0.0         | grey        | Prkr interacting protein 1 (IL11 inducible)                                                                                                            |
| Prss23                                  | NM_001007691              | 10723576        | 0.82        | -67       | 0.8         | brwn        | protease, serine, 23                                                                                                                                   |
| <b>RGD1306353</b>                       | <b>ENSRNOT00000047731</b> | <b>10784101</b> | <b>1.34</b> | <b>61</b> | <b>17.2</b> | <b>turq</b> | <b>similar to Zinc finger protein 198 (Fused in myeloproliferative disorders protein) (Rearranged in atypical myeloproliferative disorder protein)</b> |
| Rnf139                                  | NM_001127545              | 10896748        | 1.22        | 80        | 6.4         | turq        | ring finger protein 139                                                                                                                                |
| Rnf160                                  | NM_001024235              | 10752865        | 1.24        | 57        | 10.4        | turq        | ring finger protein 160                                                                                                                                |
| Rnf213                                  | ENSRNOT00000004904        | 10739992        | 1.47        | 40        | 0.0         | grey        | ring finger protein 213                                                                                                                                |
| Uba6                                    | NM_001107213              | 10772072        | 1.23        | 108       | 9.3         | turq        | ubiquitin-like modifier activating enzyme 6                                                                                                            |
| Usp9x                                   | NM_001135893              | 10936775        | 1.23        | 251       | 15.0        | turq        | ubiquitin specific peptidase 9, X-linked                                                                                                               |
| Vps13a                                  | NM_001100975              | 10729124        | 1.32        | 118       | 6.3         | turq        | vacuolar protein sorting 13 homolog A (S. cerevisiae)                                                                                                  |
| <b>RECEPTORS &amp; BINDING PROTEINS</b> |                           |                 |             |           |             |             |                                                                                                                                                        |
| <b>Abcg3l2</b>                          | <b>NM_001014133</b>       | <b>10775283</b> | <b>1.23</b> | <b>57</b> | <b>16.6</b> | <b>turq</b> | <b>ATP-binding cassette, sub-family G (WHITE), member 3-like 2</b>                                                                                     |
| Apbb3                                   | NM_053957                 | 10803961        | 1.25        | 18        | 11.4        | blue        | amyloid beta (A4) precursor protein-binding, family B, member 3                                                                                        |
| Ednra                                   | NM_012550                 | 10807022        | 1.27        | 35        | 0.0         | grey        | endothelin receptor type A                                                                                                                             |
| Gfra1                                   | NM_012959                 | 10731075        | 0.68        | -15       | 0.0         | grey        | GDNF family receptor alpha 1                                                                                                                           |
| Igfbp1                                  | NM_013144                 | 10774141        | 0.75        | -19       | 0.0         | grey        | insulin-like growth factor binding protein 1                                                                                                           |
| Osbpl8                                  | BC168899                  | 10895366        | 1.27        | 129       | 2.6         | turq        | oxysterol binding protein-like 8                                                                                                                       |
| Ppfbp2                                  | NM_001100582              | 10709691        | 1.32        | 40        | 0.0         | grey        | PTPRF interacting protein, binding protein 2 (liprin beta 2)                                                                                           |
| Ptbp2                                   | NM_001005555              | 10826418        | 1.26        | 53        | 8.8         | blue        | polypyrimidine tract binding protein 2                                                                                                                 |
| Pvrl3                                   | NM_001105883              | 10750982        | 1.33        | 55        | 6.9         | turq        | poliovirus receptor-related 3                                                                                                                          |
| <b>SIGNALING</b>                        |                           |                 |             |           |             |             |                                                                                                                                                        |
| Akap13                                  | NM_001106271              | 10707953        | 1.35        | 114       | 7.5         | blue        | A kinase (PRKA) anchor protein 13                                                                                                                      |
| Alpk1                                   | ENSRNOT00000030798        | 10826680        | 1.28        | 20        | 1.6         | turq        | alpha-kinase 1                                                                                                                                         |
| Arl6ip1                                 | AB190510                  | 10725172        | 1.39        | 135       | 10.3        | blue        | ADP-ribosylation factor-like 6 interacting protein 1                                                                                                   |
| Arrdc4                                  | NM_001047853              | 10722720        | 0.75        | -45       | 0.0         | grey        | arrestin domain containing 4                                                                                                                           |
| Ascc3                                   | BC169103                  | 10830699        | 1.23        | 74        | 9.1         | turq        | activating signal cointegrator 1 complex subunit 3                                                                                                     |
| Axin1                                   | NM_024405                 | 10732553        | 0.81        | -25       | 2.9         | turq        | axin 1                                                                                                                                                 |
| Creb1                                   | NM_134443                 | 10923929        | 1.30        | 47        | 6.3         | turq        | cAMP responsive element binding protein 1                                                                                                              |
| Dtx4                                    | NM_001047855              | 10729009        | 0.73        | -19       | 0.8         | brwn        | deltex homolog 4 (Drosophila)                                                                                                                          |
| Elmod2                                  | NM_001109506              | 10801518        | 1.26        | 36        | 14.7        | turq        | ELMO/CED-12 domain containing 2 (chr18)                                                                                                                |
| <b>Elmod2</b>                           | <b>NM_001109506</b>       | <b>10806873</b> | <b>1.27</b> | <b>42</b> | <b>18.0</b> | <b>turq</b> | <b>ELMO/CED-12 domain containing 2 (chr19)</b>                                                                                                         |
| G3bp2                                   | NM_001013989              | 10771720        | 1.21        | 170       | 7.1         | brwn        | GTPase activating protein (SH3 domain) binding protein 2                                                                                               |
| Garnl1                                  | NM_020083                 | 10890031        | 1.21        | 80        | 12.4        | turq        | GTPase activating Rap/RanGAP domain-like 1                                                                                                             |
| Gpr89                                   | NM_001139486              | 10825213        | 1.21        | 121       | 0.0         | grey        | G protein-coupled receptor 89                                                                                                                          |
| Grtp1                                   | ENSRNOT000000057740       | 10789486        | 1.76        | 13        | 4.0         | blue        | growth hormone regulated TBC protein 1                                                                                                                 |
| LOC497978                               | BC110049                  | 10746158        | 1.38        | 23        | 0.0         | grey        | similar to diacylglycerol kinase epsilon                                                                                                               |
| Map4k3                                  | NM_133407                 | 10888056        | 1.26        | 45        | 4.7         | blue        | mitogen-activated protein kinase kinase kinase kinase 3                                                                                                |
| Mpdz                                    | NM_019196                 | 10877698        | 1.22        | 38        | 15.2        | turq        | multiple PDZ domain protein                                                                                                                            |
| P2ry1                                   | NM_012800                 | 10815652        | 1.33        | 31        | 0.0         | grey        | purinergic receptor P2Y, G-protein coupled, 1                                                                                                          |
| Pik3c2a                                 | NM_001108500              | 10725114        | 1.45        | 109       | 7.2         | turq        | phosphoinositide-3-kinase, class 2, alpha polypeptide                                                                                                  |
| Pik3ip1                                 | NM_001017453              | 10773695        | 1.36        | 25        | 1.2         | blue        | phosphoinositide-3-kinase interacting protein 1                                                                                                        |
| Ppp1r12a                                | NM_053890                 | 10895310        | 1.23        | 51        | 9.7         | blue        | protein phosphatase 1, regulatory (inhibitor) subunit 12A                                                                                              |
| Ptpn4                                   | NM_001100479              | 10767132        | 1.38        | 96        | 11.3        | turq        | protein tyrosine phosphatase, non-receptor type 4                                                                                                      |
| Ptprd                                   | ENSRNOT00000066046        | 10869616        | 1.41        | 165       | 0.0         | grey        | protein tyrosine phosphatase, receptor type, D                                                                                                         |
| Ranbp2                                  | NM_001191604              | 10833492        | 1.23        | 234       | 15.6        | turq        | RAN binding protein 2                                                                                                                                  |
| Rap2a                                   | NM_053741                 | 10782056        | 1.20        | 11        | 0.5         | l-grn       | RAS related protein 2a                                                                                                                                 |
| Rasal2                                  | NM_001107188              | 10769047        | 1.28        | 26        | 4.4         | brwn        | RAS protein activator like 2                                                                                                                           |
| RGD1562230                              | BC166848                  | 10829933        | 1.28        | 16        | 0.0         | grey        | similar to catenin alpha 3                                                                                                                             |
| Rhoj                                    | NM_001008320              | 10885299        | 0.78        | -62       | 0.9         | gr60        | ras homolog gene family, member J                                                                                                                      |
| Shank3                                  | NM_021676                 | 10898622        | 1.27        | 10        | 0.0         | grey        | SH3 and multiple ankyrin repeat domains 3                                                                                                              |
| Smad7                                   | NM_030858                 | 10802734        | 1.41        | 23        | 0.0         | grey        | SMAD family member 7                                                                                                                                   |
| Smpdl3b                                 | NM_001025737              | 10880339        | 1.35        | 17        | 1.5         | l-grn       | sphingomyelin phosphodiesterase, acid-like 3B                                                                                                          |
| Spred1                                  | NM_001047089              | 10838584        | 1.20        | 45        | 2.5         | turq        | sprouty-related, EVH1 domain containing 1                                                                                                              |
| Taok1                                   | NM_173327                 | 10736420        | 1.23        | 148       | 13.5        | turq        | TAO kinase 1                                                                                                                                           |
| Tnik                                    | NM_001106422              | 10814594        | 1.25        | 12        | 1.3         | l-cn        | TRAF2 and NCK interacting kinase                                                                                                                       |
| <b>TRANSCRIPTION</b>                    |                           |                 |             |           |             |             |                                                                                                                                                        |
| Ankrd26                                 | ENSRNOT00000056301        | 10864979        | 1.30        | 15        | 1.0         | purple      | ankyrin repeat domain 26                                                                                                                               |
| Baz2b                                   | NM_001108260              | 10845470        | 1.21        | 29        | 4.0         | turq        | bromodomain adjacent to zinc finger domain, 2B                                                                                                         |
| Cblb                                    | NM_133601                 | 10753747        | 1.25        | 25        | 4.6         | blue        | Cas-Br-M (murine) ecotropic retroviral transforming sequence b                                                                                         |
| Ccdc12                                  | NM_001108783              | 10913714        | 0.78        | -29       | 1.8         | blue        | coiled-coil domain containing 12                                                                                                                       |
| Ccdc62                                  | NM_001134766              | 10761792        | 1.31        | 11        | 12.3        | blue        | coiled-coil domain containing 62                                                                                                                       |

|                                               |                           |                 |             |            |             |             |                                                                                                |
|-----------------------------------------------|---------------------------|-----------------|-------------|------------|-------------|-------------|------------------------------------------------------------------------------------------------|
| <b>Ddx17</b>                                  | <b>NM_001015018</b>       | <b>10897683</b> | <b>1.34</b> | <b>233</b> | <b>16.1</b> | <b>blue</b> | <b>DEAD (Asp-Glu-Ala-Asp) box polypeptide 17</b>                                               |
| Fam134b                                       | NM_001034912              | 10813934        | 1.20        | 57         | 0.7         | l-cn        | family with sequence similarity 134, member B                                                  |
| Fbxo32                                        | NM_133521                 | 10903896        | 1.33        | 78         | 0.0         | grey        | F-box protein 32                                                                               |
| Foxp2                                         | ENSRNOT00000034078        | 10853783        | 1.71        | 14         | 3.9         | blue        | forkhead box P2                                                                                |
| Id1                                           | NM_012797                 | 10840890        | 1.20        | 15         | 0.0         | grey        | inhibitor of DNA binding 1                                                                     |
| Ier2                                          | NM_001009541              | 10806685        | 0.71        | -15        | 0.0         | grey        | immediate early response 2                                                                     |
| Kank3                                         | NM_001108989              | 10894380        | 1.31        | 11         | 1.9         | turq        | KN motif and ankyrin repeat domains 3                                                          |
| LOC100361581                                  | ENSRNOT00000040584        | 10833564        | 0.67        | -29        | 0.0         | grey        | homeobox protein-like                                                                          |
| Mcc                                           | NM_001170534              | 10804316        | 1.22        | 33         | 0.6         | l-grn       | mutated in colorectal cancers                                                                  |
| Mllt4                                         | NM_013217                 | 10703189        | 1.24        | 47         | 0.0         | grey        | myeloid/lymphoid or mixed-lineage leukemia (trithorax homolog, Drosophila); translocated to, 4 |
| Ncbp1                                         | NM_001014785              | 10868829        | 1.22        | 73         | 5.7         | brwn        | nuclear cap binding protein subunit 1, 80kDa                                                   |
| Nfxl1                                         | NM_001170438              | 10772466        | 1.30        | 26         | 12.0        | blue        | nuclear transcription factor, X-box binding-like 1                                             |
| Nolc1                                         | NM_022869                 | 10715721        | 0.82        | -20        | 0.0         | grey        | nucleolar and coiled-body phosphoprotein 1                                                     |
| Nr1d1                                         | NM_001113422              | 10746955        | 0.77        | -70        | 3.8         | brwn        | nuclear receptor subfamily 1, group D, member 1                                                |
| Nr3c1                                         | NM_012576                 | 10804132        | 1.22        | 139        | 13.3        | turq        | nuclear receptor subfamily 3, group C, member 1                                                |
| Rb1cc1                                        | NM_001107901              | 10875183        | 1.29        | 104        | 11.5        | turq        | RB1-inducible coiled-coil 1                                                                    |
| Rel                                           | ENSRNOT00000065110        | 10778763        | 1.32        | 25         | 0.0         | grey        | v-rel reticuloendotheliosis viral oncogene homolog (avian)                                     |
| RGD1564836                                    | ENSRNOT00000038940        | 10937775        | 0.79        | -29        | 7.3         | turq        | similar to HMGA1b                                                                              |
| RGD1565257                                    | NM_001134550              | 10836650        | 1.29        | 133        | 7.1         | turq        | similar to zinc finger protein 650                                                             |
| Son                                           | NM_001170327              | 10750219        | 1.22        | 147        | 10.8        | turq        | Son DNA binding protein                                                                        |
| Spty2d1                                       | ENSRNOT00000008420        | 10862747        | 1.35        | 27         | 0.0         | grey        | SPT2, Suppressor of Ty, domain containing 1 (S. cerevisiae)                                    |
| Tet2                                          | ENSRNOT00000046775        | 10826902        | 1.20        | 21         | 0.9         | turq        | tet oncogene family member 2                                                                   |
| Trrap                                         | NM_001105907              | 10760210        | 1.20        | 15         | 0.0         | grey        | transformation/transcription domain-associated protein                                         |
| <b>Zcchc7</b>                                 | <b>NM_001106658</b>       | <b>10868662</b> | <b>1.40</b> | <b>141</b> | <b>15.6</b> | <b>blue</b> | <b>zinc finger, CCHC domain containing 7</b>                                                   |
| Zdhhc17                                       | NM_001039340              | 10902294        | 1.29        | 70         | 8.7         | turq        | zinc finger, DHHC-type containing 17                                                           |
| Zfp386                                        | NM_019620                 | 10887669        | 1.33        | 38         | 9.2         | turq        | zinc finger protein 386 (Kruppel-like)                                                         |
| <b>Zmym2</b>                                  | <b>ENSRNOT00000011684</b> | <b>10780737</b> | <b>1.23</b> | <b>107</b> | <b>16.6</b> | <b>turq</b> | <b>zinc finger, MYM-type 2</b>                                                                 |
| Znf23                                         | NM_001107428              | 10807828        | 1.20        | 18         | 5.3         | blue        | zinc finger protein 23 (KOX 16)                                                                |
| Znf292                                        | NM_001008879              | 10875941        | 1.30        | 95         | 12.0        | turq        | zinc finger protein 292                                                                        |
| Zswim6                                        | ENSRNOT00000052233        | 10821218        | 1.26        | 14         | 0.0         | grey        | zinc finger, SWIM-type containing 6                                                            |
| LOC100360593                                  | ENSRNOT00000025586        | 10720126        | 1.67        | 57         | 6.1         | blue        | zinc finger protein 59                                                                         |
| <b>TRANSLATION &amp; PROTEIN MODIFICATION</b> |                           |                 |             |            |             |             |                                                                                                |
| <b>Cpsf6</b>                                  | <b>NM_001106785</b>       | <b>10902552</b> | <b>1.20</b> | <b>42</b>  | <b>15.0</b> | <b>blue</b> | <b>cleavage and polyadenylation specific factor 6</b>                                          |
| Eif1                                          | NM_001105837              | 10738170        | 0.76        | -42        | 1.7         | blue        | eukaryotic translation initiation factor 1                                                     |
| Fusip1                                        | NM_001025738              | 10872929        | 1.23        | 62         | 8.6         | blue        | FUS interacting protein (serine-arginine rich) 1                                               |
| Ints6                                         | ENSRNOT00000050190        | 10784416        | 1.21        | 16         | 3.5         | blue        | integrator complex subunit 6                                                                   |
| Mrps14                                        | NM_001105963              | 10764983        | 0.83        | -41        | 0.0         | grey        | mitochondrial ribosomal protein S14                                                            |
| Mrps17                                        | NM_001105923              | 10758007        | 0.83        | -52        | 0.0         | grey        | mitochondrial ribosomal protein S17                                                            |
| Papolg                                        | NM_001107244              | 10778773        | 1.20        | 28         | 6.1         | turq        | poly(A) polymerase gamma                                                                       |
| Pcf11                                         | ENSRNOT00000013552        | 10723669        | 1.20        | 36         | 4.9         | turq        | PCF11, cleavage and polyadenylation factor subunit, homolog (S. cerevisiae)                    |
| Prpf4b                                        | NM_001011923              | 10798074        | 1.21        | 66         | 11.3        | blue        | PRP4 pre-mRNA processing factor 4 homolog B (yeast)                                            |
| Rbm39                                         | NM_001013207              | 10851173        | 1.22        | 325        | 14.7        | turq        | RNA binding motif protein 39                                                                   |
| Rbm5                                          | NM_001100548              | 10920170        | 1.33        | 93         | 11.3        | blue        | RNA binding motif protein 5                                                                    |
| <b>Rpl7a</b>                                  | <b>NM_001114391</b>       | <b>10753737</b> | <b>1.67</b> | <b>62</b>  | <b>16.1</b> | <b>blue</b> | <b>ribosomal protein L7a (chr11)</b>                                                           |
| <b>Rpl7a</b>                                  | <b>NM_001114391</b>       | <b>10797321</b> | <b>1.56</b> | <b>48</b>  | <b>18.4</b> | <b>blue</b> | <b>ribosomal protein L7a (chr17)</b>                                                           |
| Sf3a2                                         | NM_001011986              | 10900411        | 0.73        | -14        | 0.0         | grey        | splicing factor 3a, subunit 2                                                                  |
| Sfrs18                                        | NM_001025274              | 10867882        | 1.28        | 78         | 12.5        | blue        | splicing factor, arginine/serine-rich 18                                                       |
| <b>Sfrs7</b>                                  | <b>NM_001039035</b>       | <b>10887981</b> | <b>1.31</b> | <b>119</b> | <b>13.9</b> | <b>blue</b> | <b>splicing factor, arginine/serine-rich 7, 35kDa</b>                                          |
| Sh3bp5l                                       | NM_001127581              | 10733829        | 1.21        | 16         | 2.6         | mgnt        | SH3 binding domain protein 5 like                                                              |
| Snrnp48                                       | NM_001106107              | 10797956        | 1.24        | 31         | 5.9         | turq        | small nuclear ribonucleoprotein 48k (U11/U12)                                                  |
| Snrnp70                                       | NM_001108483              | 10721802        | 1.26        | 122        | 4.6         | blue        | small nuclear ribonucleoprotein 70 (U1)                                                        |
| Unc45a                                        | NM_001037647              | 10723039        | 1.35        | 34         | 0.0         | grey        | unc-45 homolog A (C. elegans)                                                                  |
| Ythdc2                                        | ENSRNOT00000060098        | 10801506        | 1.20        | 60         | 8.9         | turq        | YTH domain containing 2                                                                        |
| <b>MISCELLANEOUS &amp; UNKNOWN</b>            |                           |                 |             |            |             |             |                                                                                                |
| Birc6                                         | NM_001170596              | 10888460        | 1.24        | 118        | 15.2        | turq        | baculoviral IAP repeat-containing 6                                                            |
| Brwd3                                         | ENSRNOT00000050336        | 10939018        | 1.30        | 33         | 14.5        | turq        | bromodomain and WD repeat domain containing 3                                                  |
| Fam118b                                       | BC098017                  | 10916052        | 1.24        | 19         | 5.2         | turq        | family with sequence similarity 118, member B                                                  |
| Fam126b                                       | BC097998                  | 10928275        | 1.32        | 76         | 13.2        | turq        | family with sequence similarity 126, member B                                                  |
| Fam135a                                       | NM_001134597              | 10927055        | 1.27        | 76         | 7.0         | turq        | family with sequence similarity 135, member A                                                  |
| LOC314016                                     | ENSRNOT00000006122        | 10884031        | 1.31        | 38         | 0.0         | grey        | similar to mKIAA0230 protein                                                                   |
| LOC367289                                     | ENSRNOT00000067589        | 10928584        | 1.24        | 62         | 3.8         | turq        | similar to CG4699-PA, isoform A                                                                |
| LOC499120                                     | U78125                    | 10705806        | 1.33        | 13         | 2.3         | blue        | hypothetical protein LOC499120                                                                 |
| LOC500625                                     | ENSRNOT00000006877        | 10883443        | 1.42        | 65         | 15.2        | turq        | hypothetical protein LOC500625                                                                 |
| <b>LOC688452</b>                              | <b>FM212919</b>           | <b>10703432</b> | <b>2.02</b> | <b>78</b>  | <b>13.8</b> | <b>blue</b> | <b>hypothetical protein LOC688452</b>                                                          |
| MGC94190                                      | BC090318                  | 10761329        | 0.82        | -50        | 6.1         | turq        | similar to O610007L01Rik protein                                                               |
| MGC94282                                      | NR_027366                 | 10865838        | 0.67        | -11        | 2.2         | blue        | similar to 593041619Rik protein                                                                |
| RGD1308023                                    | ENSRNOT00000015637        | 10850492        | 1.28        | 45         | 1.3         | l-cn        | similar to CG5521-PA                                                                           |
| <b>RGD1308143</b>                             | <b>BC083847</b>           | <b>10925725</b> | <b>1.38</b> | <b>127</b> | <b>18.9</b> | <b>turq</b> | <b>similar to D330021B20 protein</b>                                                           |

|                   |                           |                 |             |            |             |             |                                               |
|-------------------|---------------------------|-----------------|-------------|------------|-------------|-------------|-----------------------------------------------|
| <b>RGD1308297</b> | <b>BC082039</b>           | <b>10785745</b> | <b>1.26</b> | <b>70</b>  | <b>14.8</b> | <b>blue</b> | <b>similar to CG10084-PA</b>                  |
| RGD1308616        | ENSRNOT00000039235        | 10879244        | 1.34        | 30         | 6.8         | blue        | similar to KIAA0467 protein                   |
| RGD1359529        | NM_001014193              | 10872829        | 1.44        | 260        | 7.0         | blue        | similar to chromosome 1 open reading frame 63 |
| RGD1559496        | NM_001106199              | 10808874        | 1.24        | 21         | 1.3         | l-cn        | similar to hypothetical protein               |
| RGD1564317        | XM_579774                 | 10752970        | 0.80        | -16        | 0.0         | grey        | RGD1564317                                    |
| RGD1565690        | ENSRNOT00000039316        | 10862818        | 1.33        | 34         | 0.0         | grey        | similar to mKIAA2027 protein                  |
| Tmem126b          | NM_001106280              | 10723644        | 1.21        | 31         | 5.4         | turq        | transmembrane protein 126B                    |
| Tmem57            | NM_001025699              | 10880564        | 1.32        | 51         | 0.0         | grey        | transmembrane protein 57                      |
| Tnrc6a            | NM_001107549              | 10710695        | 1.21        | 48         | 1.4         | cyan        | trinucleotide repeat containing 6a            |
| <b>Ttc14</b>      | <b>NM_001107666</b>       | <b>10814817</b> | <b>1.33</b> | <b>66</b>  | <b>16.6</b> | <b>turq</b> | <b>tetratricopeptide repeat domain 14</b>     |
| Ttc17             | BC168714                  | 10847668        | 1.21        | 38         | 0.0         | grey        | tetratricopeptide repeat domain 17            |
| <b>EST's</b>      |                           |                 |             |            |             |             |                                               |
| LOC100363003      | ENSRNOT00000066200        | 10794752        | 0.82        | -66        | 0.0         | grey        | cDNA sequence BC034664-like                   |
| LOC100364912      | ENSRNOT0000006697         | 10901039        | 1.30        | 218        | 13.7        | turq        | rCG29233-like                                 |
| LOC100365715      | ENSRNOT0000001232         | 10915310        | 1.21        | 12         | 3.9         | turq        | rCG31761-like                                 |
| LOC100366213      | XR_085848                 | 10879660        | 1.25        | 26         | 3.8         | turq        | hypothetical LOC100366213                     |
| LOC290577         | ENSRNOT00000060770        | 10786995        | 1.29        | 166        | 11.7        | turq        | hypothetical LOC290577                        |
| RGD1307235        | NM_001134546              | 10763237        | 1.29        | 49         | 1.0         | l-cn        | similar to RIKEN cDNA 2310035C23              |
| RGD1307897        | BC091339                  | 10884868        | 1.34        | 15         | 2.5         | turq        | similar to RIKEN cDNA C730036B14 gene         |
| RGD1308923        | NM_001108698              | 10874585        | 0.81        | -15        | 0.0         | grey        | LOC362678                                     |
| RGD1309374        | ENSRNOT00000020492        | 10703327        | 1.25        | 20         | 10.6        | blue        | LOC361485                                     |
| RGD1310507        | NM_001047891              | 10919658        | 1.20        | 22         | 0.0         | grey        | similar to RIKEN cDNA 1300017J02              |
| RGD1560108        | NM_001109161              | 10713518        | 1.38        | 27         | 2.5         | blue        | similar to RIKEN cDNA 2700081O15              |
| Mir7a-1           | NR_031795                 | 10793838        | 1.23        | 17         | 3.5         | blue        | microRNA mir-7a-1                             |
|                   | BC090353                  | 10728028        | 1.89        | 2083       | 11.0        | blue        |                                               |
|                   | ENSRNOT00000000260        | 10746156        | 0.74        | -15        | 0.0         | grey        |                                               |
|                   | ENSRNOT00000001815        | 10760818        | 1.25        | 23         | 8.8         | blue        |                                               |
|                   | ENSRNOT00000002231        | 10753300        | 1.26        | 54         | 6.9         | blue        |                                               |
|                   | <b>ENSRNOT00000006727</b> | <b>10777290</b> | <b>1.27</b> | <b>52</b>  | <b>1.8</b>  | <b>l-cn</b> |                                               |
|                   | ENSRNOT00000012501        | 10911158        | 1.20        | 54         | 3.0         | turq        |                                               |
|                   | ENSRNOT00000012671        | 10733624        | 1.29        | 86         | 7.5         | turq        |                                               |
|                   | ENSRNOT00000015387        | 10815763        | 1.31        | 85         | 0.6         | l-grn       |                                               |
|                   | ENSRNOT00000015827        | 10883321        | 1.22        | 26         | 0.0         | grey        |                                               |
|                   | ENSRNOT00000016227        | 10916791        | 1.26        | 16         | 12.6        | blue        |                                               |
|                   | ENSRNOT00000020883        | 10823254        | 1.34        | 71         | 7.1         | blue        |                                               |
|                   | <b>ENSRNOT00000021181</b> | <b>10821771</b> | <b>1.20</b> | <b>87</b>  | <b>17.5</b> | <b>turq</b> |                                               |
|                   | <b>ENSRNOT00000022344</b> | <b>10814940</b> | <b>1.25</b> | <b>151</b> | <b>16.2</b> | <b>turq</b> |                                               |
|                   | ENSRNOT00000024516        | 10729852        | 0.82        | -44        | 2.2         | gr-yel      |                                               |
|                   | ENSRNOT00000027019        | 10801254        | 1.45        | 18         | 5.5         | blue        |                                               |
|                   | ENSRNOT00000030200        | 10840224        | 1.33        | 11         | 6.2         | blue        |                                               |
|                   | ENSRNOT00000031814        | 10925923        | 0.83        | -10        | 1.1         | brwn        |                                               |
|                   | ENSRNOT00000035247        | 10755897        | 1.28        | 48         | 15.6        | turq        |                                               |
|                   | ENSRNOT00000035876        | 10812834        | 1.51        | 19         | 2.9         | turq        |                                               |
|                   | ENSRNOT00000035991        | 10846346        | 1.52        | 14         | 0.0         | grey        |                                               |
|                   | ENSRNOT00000036063        | 10923727        | 1.43        | 128        | 8.9         | turq        |                                               |
|                   | ENSRNOT00000039392        | 10801071        | 0.80        | -17        | 2.7         | turq        |                                               |
|                   | <b>ENSRNOT00000039420</b> | <b>10911476</b> | <b>1.75</b> | <b>45</b>  | <b>14.6</b> | <b>blue</b> |                                               |
|                   | ENSRNOT00000039879        | 10897891        | 0.83        | -33        | 0.0         | grey        |                                               |
|                   | ENSRNOT00000039948        | 10767044        | 0.75        | -116       | 0.0         | grey        |                                               |
|                   | ENSRNOT00000041674        | 10731416        | 0.81        | -10        | 0.0         | grey        |                                               |
|                   | ENSRNOT00000043970        | 10934560        | 0.75        | -13        | 2.6         | blue        |                                               |
|                   | ENSRNOT00000044552        | 10822904        | 1.22        | 73         | 0.0         | grey        |                                               |
|                   | ENSRNOT00000048364        | 10900112        | 1.38        | 22         | 0.0         | grey        |                                               |
|                   | ENSRNOT00000051851        | 10939758        | 0.78        | -13        | 5.4         | turq        |                                               |
|                   | ENSRNOT00000052461        | 10939899        | 0.82        | -11        | 0.9         | gr-yel      |                                               |
|                   | ENSRNOT00000052487        | 10827448        | 1.23        | 13         | 0.0         | grey        |                                               |
|                   | ENSRNOT00000052610        | 10910770        | 1.28        | 28         | 8.3         | blue        |                                               |
|                   | ENSRNOT00000052659        | 10784223        | 1.46        | 38         | 6.0         | blue        |                                               |
|                   | ENSRNOT00000052722        | 10737647        | 1.20        | 10         | 7.6         | blue        |                                               |
|                   | ENSRNOT00000052997        | 10908106        | 1.41        | 50         | 3.1         | blue        |                                               |
|                   | ENSRNOT00000053086        | 10811999        | 0.75        | -268       | 4.1         | gr-yel      |                                               |
|                   | ENSRNOT00000053371        | 10863267        | 1.22        | 17         | 5.0         | blue        |                                               |
|                   | ENSRNOT00000053846        | 10702161        | 1.47        | 12         | 0.0         | grey        |                                               |
|                   | ENSRNOT00000053919        | 10755129        | 0.77        | -331       | 3.1         | gr-yel      |                                               |
|                   | ENSRNOT00000054058        | 10910768        | 1.25        | 13         | 5.2         | blue        |                                               |
|                   | ENSRNOT00000054087        | 10864356        | 1.36        | 21         | 0.0         | grey        |                                               |
|                   | ENSRNOT00000054304        | 10716148        | 1.37        | 20         | 2.3         | blue        |                                               |
|                   | ENSRNOT00000055921        | 10849643        | 1.33        | 12         | 2.6         | blue        |                                               |
|                   | ENSRNOT00000057090        | 10857382        | 1.20        | 35         | 0.0         | grey        |                                               |

|  |                           |                 |             |            |             |             |
|--|---------------------------|-----------------|-------------|------------|-------------|-------------|
|  | ENSRNOT00000057159        | 10766878        | 2.23        | 72         | 8.4         | blue        |
|  | ENSRNOT00000059520        | 10772514        | 0.77        | -21        | 0.0         | grey        |
|  | ENSRNOT00000059561        | 10831804        | 0.82        | -49        | 0.8         | l-grn       |
|  | ENSRNOT00000060917        | 10932310        | 1.20        | 18         | 2.3         | blue        |
|  | ENSRNOT00000063495        | 10892977        | 1.52        | 32         | 12.8        | blue        |
|  | <b>ENSRNOT00000065961</b> | <b>10801606</b> | <b>1.29</b> | <b>198</b> | <b>20.2</b> | <b>turq</b> |
|  | ENSRNOT00000069287        | 10877567        | 0.74        | -18        | 1.2         | gr-yel      |
|  | ENSRNOT00000069910        | 10892067        | 0.83        | -12        | 1.7         | gr-yel      |
|  | ENSRNOT00000070202        | 10834604        | 0.67        | -43        | 1.0         | l-cn        |
|  | FJ807484                  | 10933538        | 1.23        | 23         | 4.5         | turq        |
|  | FQ222240                  | 10714078        | 1.21        | 12         | 4.6         | turq        |
|  | FQ222682                  | 10722718        | 0.61        | -182       | 0.0         | grey        |
|  | FQ233900                  | 10765040        | 0.69        | -128       | 0.0         | grey        |
|  | GENSCAN00000039416        | 10704655        | 0.80        | -30        | 0.0         | grey        |
|  | ---                       | 10802189        | 1.58        | 61         | 1.7         | black       |
|  | ---                       | 10700479        | 0.81        | -106       | 0.7         | black       |
|  | ---                       | <b>10700930</b> | <b>1.61</b> | <b>268</b> | <b>14.8</b> | <b>blue</b> |
|  | ---                       | 10864272        | 1.66        | 18         | 13.6        | blue        |
|  | ---                       | 10701432        | 2.11        | 51         | 13.6        | blue        |
|  | ---                       | 10815943        | 1.87        | 61         | 12.8        | blue        |
|  | ---                       | 10700873        | 1.90        | 2161       | 11.7        | blue        |
|  | ---                       | 10700829        | 2.02        | 67         | 11.2        | blue        |
|  | ---                       | 10700478        | 3.12        | 130        | 9.8         | blue        |
|  | ---                       | 10700654        | 2.17        | 52         | 9.5         | blue        |
|  | ---                       | 10717953        | 1.32        | 25         | 9.4         | blue        |
|  | ---                       | 10700423        | 1.82        | 79         | 9.3         | blue        |
|  | ---                       | 10701535        | 3.33        | 279        | 9.3         | blue        |
|  | ---                       | 10701243        | 1.84        | 103        | 9.0         | blue        |
|  | ---                       | 10700950        | 2.20        | 61         | 8.5         | blue        |
|  | ---                       | 10700545        | 1.92        | 39         | 8.5         | blue        |
|  | ---                       | 10701137        | 2.63        | 107        | 7.6         | blue        |
|  | ---                       | 10700397        | 2.21        | 83         | 7.4         | blue        |
|  | ---                       | 10700826        | 1.54        | 21         | 7.1         | blue        |
|  | ---                       | 10701418        | 2.22        | 74         | 6.6         | blue        |
|  | ---                       | 10700464        | 2.91        | 95         | 6.4         | blue        |
|  | ---                       | 10700219        | 1.68        | 20         | 6.1         | blue        |
|  | ---                       | 10701140        | 2.59        | 196        | 6.1         | blue        |
|  | ---                       | 10701580        | 1.69        | 25         | 6.0         | blue        |
|  | ---                       | 10862453        | 2.01        | 283        | 5.5         | blue        |
|  | ---                       | 10701393        | 2.22        | 44         | 5.2         | blue        |
|  | ---                       | 10701233        | 2.53        | 60         | 4.7         | blue        |
|  | ---                       | 10700657        | 2.33        | 66         | 4.6         | blue        |
|  | ---                       | 10700535        | 2.15        | 65         | 4.4         | blue        |
|  | ---                       | 10700759        | 2.35        | 65         | 4.3         | blue        |
|  | ---                       | 10700127        | 1.74        | 30         | 3.7         | blue        |
|  | ---                       | 10700727        | 1.60        | 18         | 3.1         | blue        |
|  | ---                       | 10812357        | 1.54        | 16         | 3.1         | blue        |
|  | ---                       | 10700343        | 1.36        | 13         | 2.6         | blue        |
|  | ---                       | 10700898        | 1.43        | 21         | 2.6         | blue        |
|  | ---                       | 10700460        | 1.45        | 20         | 2.4         | blue        |
|  | ---                       | 10799156        | 1.20        | 25         | 1.0         | blue        |
|  | ---                       | 10701059        | 0.58        | -19        | 0.0         | grey        |
|  | ---                       | 10700486        | 0.79        | -14        | 0.0         | grey        |
|  | ---                       | 10701218        | 1.63        | 12         | 0.0         | grey        |
|  | ---                       | 10700556        | 0.75        | -217       | 0.0         | grey        |
|  | ---                       | 10700623        | 0.82        | -101       | 0.0         | grey        |
|  | ---                       | 10700089        | 0.44        | -27        | 0.0         | grey        |
|  | ---                       | 10700908        | 0.68        | -19        | 0.0         | grey        |
|  | ---                       | 10701180        | 0.74        | -15        | 0.0         | grey        |
|  | ---                       | 10700096        | 1.40        | 12         | 0.0         | grey        |
|  | ---                       | 10701443        | 1.51        | 12         | 0.0         | grey        |
|  | ---                       | 10700788        | 1.42        | 16         | 0.0         | grey        |
|  | ---                       | 10701591        | 1.75        | 17         | 0.0         | grey        |
|  | ---                       | 10701399        | 1.57        | 33         | 0.0         | grey        |
|  | ---                       | 10701472        | 1.83        | 56         | 0.0         | grey        |
|  | ---                       | 10701359        | 2.43        | 59         | 0.0         | grey        |
|  | ---                       | 10701461        | 1.92        | 62         | 0.0         | grey        |
|  | ---                       | 10865696        | 1.85        | 180        | 0.0         | grey        |
|  | ---                       | 10700457        | 1.21        | 316        | 0.0         | grey        |

|     |          |      |      |      |      |  |
|-----|----------|------|------|------|------|--|
| --- | 10701136 | 0.63 | -21  | 0.7  | l-cn |  |
| --- | 10921268 | 1.97 | 154  | 12.2 | turq |  |
| --- | 10714204 | 1.73 | 367  | 11.3 | turq |  |
| --- | 10700124 | 1.89 | 511  | 8.3  | turq |  |
| --- | 10701207 | 2.58 | 286  | 8.0  | turq |  |
| --- | 10908810 | 1.20 | 71   | 8.0  | turq |  |
| --- | 10932319 | 2.05 | 89   | 6.4  | turq |  |
| --- | 10700714 | 1.81 | 267  | 6.2  | turq |  |
| --- | 10939699 | 1.91 | 45   | 5.6  | turq |  |
| --- | 10701336 | 1.54 | 525  | 4.4  | turq |  |
| --- | 10701392 | 1.54 | 16   | 3.8  | turq |  |
| --- | 10700674 | 0.68 | -10  | 3.7  | turq |  |
| --- | 10700473 | 1.67 | 139  | 3.6  | turq |  |
| --- | 10701404 | 1.43 | 1454 | 3.4  | turq |  |
| --- | 10701260 | 2.24 | 195  | 2.9  | turq |  |
| --- | 10700703 | 1.36 | 144  | 2.2  | turq |  |
| --- | 10700573 | 1.69 | 87   | 1.3  | turq |  |

## B. Female Kidney

| Gene Symbol                       | RefSeq/GenBank/<br>Ensemble Number | Affymetrix<br>Probset ID | V/C  | Mean<br>Diff. | k.in | Mod   | Gene Title                                                                               |
|-----------------------------------|------------------------------------|--------------------------|------|---------------|------|-------|------------------------------------------------------------------------------------------|
| <b>APOPTOSIS</b>                  |                                    |                          |      |               |      |       |                                                                                          |
| Bcl2l1                            | NM_031535                          | 10850826                 | 1.22 | 16            | 0.0  | grey  | Bcl2-like 1                                                                              |
| Casp1                             | NM_012762                          | 10907815                 | 0.68 | -69           | 2.2  | mgnt  | caspace 1                                                                                |
| Fastk                             | NM_001011967                       | 10852896                 | 1.21 | 55            | 0.9  | mgnt  | Fas-activated serine/threonine kinase                                                    |
| <b>CYTOSKELETON-ECM</b>           |                                    |                          |      |               |      |       |                                                                                          |
| Clecsf6                           | NM_001005899                       | 10858573                 | 0.74 | -20           | 1.6  | mgnt  | C-type (calcium dependent, carbohydrate recognition domain) lectin, superfamily member 6 |
| Col14a1                           | NM_001130548                       | 10896558                 | 0.69 | -50           | 0.0  | grey  | collagen, type XIV, alpha 1                                                              |
| Esco1                             | BC166441                           | 10803194                 | 0.77 | -40           | 0.0  | grey  | establishment of cohesion 1 homolog 1 (S. cerevisiae)                                    |
| Kifc3                             | NM_001103352                       | 10805944                 | 1.21 | 12            | 1.9  | mgnt  | kinesin family member C3                                                                 |
| LOC100361793                      | ENSRNOT00000067139                 | 10832281                 | 1.23 | 18            | 0.0  | grey  | keratin associated protein 12-1-like                                                     |
| Tpm2                              | NM_001024345                       | 10876324                 | 0.83 | -21           | 0.0  | grey  | tropomyosin 2, beta                                                                      |
| <b>DEVELOPMENT</b>                |                                    |                          |      |               |      |       |                                                                                          |
| Acad                              | NM_001037193                       | 10810662                 | 1.28 | 36            | 2.1  | red   | adrenocortical dysplasia homolog (mouse)                                                 |
| Fance                             | NM_001191718                       | 10828723                 | 1.28 | 13            | 0.0  | grey  | Fanconi anemia, complementation group E                                                  |
| Lmbr1l                            | NM_001013950                       | 10907062                 | 1.22 | 16            | 1.2  | cyan  | limb region 1-like homolog (mouse)                                                       |
| Lrrc10                            | NM_001128494                       | 10895585                 | 0.83 | -13           | 0.0  | grey  | leucine-rich repeat-containing 10                                                        |
| Luc7l                             | NM_001024269                       | 10732581                 | 1.21 | 40            | 5.9  | blue  | LUC7-like (S. cerevisiae)                                                                |
| Nov                               | NM_030868                          | 10896541                 | 0.83 | -18           | 0.0  | grey  | nephroblastoma overexpressed gene                                                        |
| Pard3b                            | NM_001191808                       | 10923810                 | 1.23 | 27            | 0.8  | cyan  | par-3 partitioning defective 3 homolog B (C. elegans)                                    |
| Rapgef3                           | NM_021690                          | 10906679                 | 1.27 | 13            | 0.0  | grey  | Rap guanine nucleotide exchange factor (GEF) 3                                           |
| Samd9l                            | ENSRNOT00000013044                 | 10860806                 | 0.75 | -141          | 0.0  | grey  | sterile alpha motif domain containing 9-like                                             |
| Sv2a                              | NM_057210                          | 10817512                 | 1.59 | 16            | 0.0  | grey  | synaptic vesicle glycoprotein 2a                                                         |
| <b>EPIGENETICS</b>                |                                    |                          |      |               |      |       |                                                                                          |
| Dot1l                             | NM_001108733                       | 10900419                 | 1.31 | 16            | 0.7  | mgnt  | DOT1-like, histone H3 methyltransferase (S. cerevisiae)                                  |
| RGD1561065                        | NM_001108253                       | 10933017                 | 1.20 | 17            | 0.0  | grey  | similar to mKIAA1111 protein                                                             |
| Suv420h2                          | NM_001107475                       | 10718873                 | 1.38 | 25            | 0.0  | grey  | suppressor of variegation 4-20 homolog 2 (Drosophila)                                    |
| <b>GROWTH FACTORS</b>             |                                    |                          |      |               |      |       |                                                                                          |
| Angptl1                           | NM_001109383                       | 10764862                 | 0.77 | -21           | 1.9  | mgnt  | angiopoietin-like 1                                                                      |
| <b>IMMUNE RESPONSE</b>            |                                    |                          |      |               |      |       |                                                                                          |
| C1qb                              | NM_019262                          | 10880727                 | 0.77 | -38           | 0.0  | grey  | complement component 1, q subcomponent, B chain                                          |
| Cd36                              | NM_031561                          | 10853240                 | 0.61 | -223          | 0.0  | grey  | CD36 molecule (thrombospondin receptor)                                                  |
| Cd48                              | NM_139103                          | 10765634                 | 0.80 | -307          | 2.6  | mgnt  | Cd48 molecule                                                                            |
| Ifi44                             | NM_001107729                       | 10827349                 | 0.83 | -43           | 0.0  | grey  | interferon-induced protein 44                                                            |
| Ifi47                             | NM_172019                          | 10733056                 | 0.81 | -163          | 2.7  | mgnt  | interferon gamma inducible protein 47                                                    |
| LOC287167                         | NM_001013853                       | 10741765                 | 1.25 | 302           | 1.2  | m-blu | globin, alpha                                                                            |
| RT1-Bb                            | NM_001004084                       | 10831567                 | 0.69 | -76           | 0.0  | grey  | RT1 class II, locus Bb                                                                   |
| Slamf9                            | NM_001105971                       | 10765746                 | 0.72 | -12           | 0.0  | grey  | SLAM family member 9                                                                     |
| <b>METABOLISM &amp; TRANSPORT</b> |                                    |                          |      |               |      |       |                                                                                          |
| Alox15                            | NM_031010                          | 10744425                 | 1.22 | 11            | 0.6  | m-blu | arachidonate 15-lipoxygenase                                                             |
| Aqp2                              | NM_012909                          | 10899145                 | 1.28 | 11            | 0.0  | grey  | aquaporin 2 (collecting duct)                                                            |
| Atp1a2                            | NM_012505                          | 10769998                 | 0.79 | -16           | 0.0  | grey  | ATPase, Na+/K+ transporting, alpha 2 polypeptide                                         |
| Clcnkb                            | NM_173103                          | 10881084                 | 1.38 | 16            | 0.0  | grey  | chloride channel Kb                                                                      |
| Colec12                           | NM_001025721                       | 10800088                 | 0.79 | -47           | 1.2  | mgnt  | collectin sub-family member 12                                                           |
| Endog                             | NM_001034938                       | 10844136                 | 1.31 | 24            | 0.0  | grey  | endonuclease G                                                                           |
| Gypc                              | NM_001013233                       | 10803666                 | 0.80 | -54           | 0.0  | grey  | glycophorin C (Gerbich blood group)                                                      |
| Hexdc                             | NM_001142562                       | 10740221                 | 1.55 | 29            | 0.7  | cyan  | hexosaminidase (glycosyl hydrolase family 20, catalytic domain) containing               |

|                                               |                           |                 |             |             |            |             |                                                                                              |
|-----------------------------------------------|---------------------------|-----------------|-------------|-------------|------------|-------------|----------------------------------------------------------------------------------------------|
| <b>Idua</b>                                   | <b>NM_001172084</b>       | <b>10775001</b> | <b>1.28</b> | <b>68</b>   | <b>2.7</b> | <b>cyan</b> | <b>alpha-L-iduronidase</b>                                                                   |
| Kcnj10                                        | NM_031602                 | 10765740        | 1.26        | 12          | 0.9        | pink        | potassium inwardly-rectifying channel, subfamily J, member 10                                |
| Lcp1                                          | NM_001012044              | 10781496        | 0.81        | -59         | 2.4        | mgnt        | lymphocyte cytosolic protein 1                                                               |
| LOC687381                                     | ENSRNOT00000034261        | 10743622        | 1.30        | 18          | 0.0        | grey        | similar to COX10 homolog, cytochrome c oxidase assembly protein, heme A: farnesyltransferase |
| Naaa                                          | NM_001010967              | 10771690        | 0.73        | -28         | 0.0        | grey        | N-acyl ethanolamine acid amidase                                                             |
| Nat5                                          | NM_001108595              | 10840460        | 0.83        | -38         | 0.0        | grey        | N-acetyltransferase 5                                                                        |
| Sh3bgrl                                       | NM_001173339              | 10934669        | 0.83        | -142        | 2.7        | mgnt        | SH3 domain binding glutamic acid-rich protein like                                           |
| Slc12a3                                       | NM_019345                 | 10809337        | 1.49        | 20          | 0.0        | grey        | solute carrier family 12 (sodium/chloride transporters), member 3                            |
| Slc7a4                                        | NM_001107078              | 10752433        | 1.36        | 17          | 1.9        | mgnt        | solute carrier family 7 (cationic amino acid transporter, y+ system), member 4               |
| Trak1                                         | NM_001134565              | 10914385        | 1.26        | 33          | 0.0        | grey        | trafficking protein, kinesin binding 1                                                       |
| <b>RECEPTORS &amp; BINDING PROTEINS</b>       |                           |                 |             |             |            |             |                                                                                              |
| Agtr1a                                        | NM_030985                 | 10798194        | 0.82        | -34         | 1.4        | mgnt        | angiotensin II receptor, type 1a                                                             |
| Leng8                                         | NM_001037790              | 10719006        | 1.36        | 56          | 8.2        | blue        | leukocyte receptor cluster (LRC) member 8                                                    |
| <b>Lpar6</b>                                  | <b>NM_001045843</b>       | <b>10781441</b> | <b>0.83</b> | <b>-76</b>  | <b>3.0</b> | <b>mgnt</b> | <b>lysophosphatidic acid receptor 6</b>                                                      |
| RGD1562717                                    | ENSRNOT00000049859        | 10753629        | 0.76        | -22         | 1.8        | mgnt        | similar to ABI gene family, member 3 (NESH) binding protein                                  |
| Rtp4                                          | NM_001108321              | 10755088        | 0.77        | -45         | 2.1        | mgnt        | receptor (chemosensory) transporter protein 4                                                |
| <b>SIGNALING</b>                              |                           |                 |             |             |            |             |                                                                                              |
| Arhgap8                                       | NM_001004242              | 10898268        | 1.21        | 16          | 0.0        | grey        | Rho GTPase activating protein 8                                                              |
| LOC686547                                     | ENSRNOT00000012614        | 10785618        | 0.81        | -48         | 0.0        | grey        | similar to TBC1 domain family member 4 (Akt substrate of 160 kDa) (AS160)                    |
| P2ry1                                         | NM_012800                 | 10815652        | 1.51        | 44          | 0.0        | grey        | purinergic receptor P2Y, G-protein coupled, 1                                                |
| Plk2                                          | NM_031821                 | 10812954        | 0.82        | -54         | 0.0        | grey        | polo-like kinase 2 (Drosophila)                                                              |
| Reps1                                         | NM_001106264              | 10701880        | 1.20        | 22          | 1.0        | red         | RALBP1 associated Eps domain containing 1                                                    |
| Rgs18                                         | NM_001047084              | 10768357        | 0.83        | -46         | 2.3        | mgnt        | regulator of G-protein signaling 18                                                          |
| Tbc1d17                                       | NM_001106258              | 10721486        | 1.24        | 47          | 2.6        | salmo       | TBC1 domain family, member 17                                                                |
| <b>TRANSCRIPTION</b>                          |                           |                 |             |             |            |             |                                                                                              |
| Banp                                          | NM_001106191              | 10808461        | 1.26        | 17          | 5.1        | ylw         | Btg3 associated nuclear protein                                                              |
| Cnot7                                         | NM_001107313              | 10787209        | 0.81        | -71         | 0.0        | grey        | CCR4-NOT transcription complex, subunit 7                                                    |
| Gata3                                         | NM_133293                 | 10796220        | 1.47        | 11          | 0.0        | grey        | GATA binding protein 3                                                                       |
| Gmeb1                                         | NM_001109268              | 10880240        | 1.22        | 21          | 0.7        | mgnt        | glucocorticoid modulatory element binding protein 1                                          |
| Ino80d                                        | NM_001191809              | 10928475        | 1.22        | 27          | 0.6        | cyan        | INO80 complex subunit D                                                                      |
| Klhl3                                         | ENSRNOT00000034877        | 10793893        | 1.42        | 11          | 0.5        | cyan        | kelch-like 3 (Drosophila)                                                                    |
| LOC100125368                                  | NM_001139487              | 10900136        | 0.81        | -34         | 1.6        | red         | zinc finger protein LOC100125368                                                             |
| LOC100363361                                  | ENSRNOT00000028553        | 10824904        | 1.27        | 15          | 1.2        | red         | zinc finger protein 687-like                                                                 |
| Nfrkb                                         | NM_001108133              | 10908833        | 1.22        | 23          | 1.5        | cyan        | nuclear factor related to kappa B binding protein                                            |
| Nol6                                          | EF688596                  | 10876076        | 1.23        | 22          | 0.0        | grey        | nucleolar protein family 6 (RNA-associated)                                                  |
| RGD1564400                                    | ENSRNOT00000033258        | 10836556        | 0.78        | -79         | 2.3        | black       | similar to Eukaryotic translation initiation factor 5 (eIF-5)                                |
| Runx1                                         | NM_017325                 | 10753222        | 0.83        | -13         | 0.0        | grey        | runt-related transcription factor 1                                                          |
| <b>Tceb1</b>                                  | <b>NM_022593</b>          | <b>10874923</b> | <b>0.82</b> | <b>-215</b> | <b>2.9</b> | <b>mgnt</b> | <b>transcription elongation factor B (SIII), polypeptide 1</b>                               |
| Tsc2d2                                        | NM_001191960              | 10815534        | 1.27        | 49          | 1.9        | cyan        | TSC2 domain family, member 2                                                                 |
| <b>TRANSLATION &amp; PROTEIN MODIFICATION</b> |                           |                 |             |             |            |             |                                                                                              |
| Mif4gd                                        | NM_001014122              | 10748991        | 1.22        | 21          | 1.2        | mgnt        | MIF4G domain containing                                                                      |
| Parp14                                        | NM_001191659              | 10751469        | 0.82        | -74         | 0.0        | grey        | poly (ADP-ribose) polymerase family, member 14                                               |
| RGD1561453                                    | ENSRNOT00000049732        | 10714411        | 0.78        | -18         | 2.8        | gr-yel      | similar to ribosomal protein S12                                                             |
| Rps27a                                        | NM_031113                 | 10879392        | 0.75        | -531        | 1.8        | gr-yel      | ribosomal protein S27a                                                                       |
| Snrnp70                                       | NM_001108483              | 10721802        | 1.20        | 97          | 4.6        | blue        | small nuclear ribonucleoprotein 70 (U1)                                                      |
| Srrm2                                         | ENSRNOT00000006370        | 10731980        | 1.28        | 155         | 7.3        | blue        | serine/arginine repetitive matrix 2                                                          |
| <b>MISCELLANEOUS &amp; UNKNOWN</b>            |                           |                 |             |             |            |             |                                                                                              |
| LOC100125385                                  | NM_001103364              | 10897239        | 1.26        | 26          | 1.9        | red         | hypothetical protein LOC100125385                                                            |
| RGD1306926                                    | ENSRNOT00000054974        | 10749620        | 1.27        | 11          | 1.0        | cyan        | similar to hypothetical protein FLJ22175                                                     |
| <b>RGD1308616</b>                             | <b>ENSRNOT00000039235</b> | <b>10879242</b> | <b>1.49</b> | <b>36</b>   | <b>2.4</b> | <b>cyan</b> | <b>similar to KIAA0467 protein</b>                                                           |
| RGD1359529                                    | NM_001014193              | 10872829        | 1.27        | 168         | 7.0        | blue        | similar to chromosome 1 open reading frame 63                                                |
| Tc2n                                          | NM_001025152              | 10891765        | 0.74        | -65         | 0.0        | grey        | tandem C2 domains, nuclear                                                                   |
| Tmem229b                                      | NM_001109359              | 10890780        | 0.79        | -12         | 0.0        | grey        | transmembrane protein 229B                                                                   |
| Tmem38a                                       | NM_001100175              | 10790651        | 1.23        | 19          | 1.1        | cyan        | transmembrane protein 38a                                                                    |
| Tmem81                                        | ENSRNOT00000003481        | 10763931        | 0.81        | -71         | 1.5        | mgnt        | transmembrane protein 81                                                                     |
| <b>EST's</b>                                  |                           |                 |             |             |            |             |                                                                                              |
| RGD1309220                                    | BC105865                  | 10927332        | 1.24        | 30          | 1.9        | cyan        | similar to RIKEN cDNA 4632411B12                                                             |
| RGD1310827                                    | NM_001034010              | 10862605        | 0.70        | -23         | 0.0        | grey        | similar to RIKEN cDNA 1200009O22; EST AI316813                                               |
|                                               | ENSRNOT00000001195        | 10911925        | 0.83        | -11         | 2.1        | green       |                                                                                              |
|                                               | ENSRNOT00000001469        | 10760483        | 1.22        | 15          | 0.8        | cyan        |                                                                                              |
|                                               | ENSRNOT00000001814        | 10761917        | 1.23        | 17          | 0.0        | grey        |                                                                                              |
|                                               | ENSRNOT00000002539        | 10755798        | 1.31        | 25          | 0.0        | grey        |                                                                                              |
|                                               | ENSRNOT000000027802       | 10780527        | 1.27        | 30          | 1.4        | cyan        |                                                                                              |
|                                               | ENSRNOT000000030293       | 10718408        | 0.82        | -24         | 2.4        | turq        |                                                                                              |
|                                               | ENSRNOT000000038275       | 10902016        | 0.80        | -12         | 0.0        | grey        |                                                                                              |
|                                               | ENSRNOT000000052689       | 10896964        | 0.82        | -29         | 2.5        | gr-yel      |                                                                                              |
|                                               | ENSRNOT000000052749       | 10779724        | 0.68        | -18         | 3.3        | gr-yel      |                                                                                              |
|                                               | ENSRNOT000000052790       | 10831150        | 0.79        | -14         | 2.9        | gr-yel      |                                                                                              |



|  |                           |                 |             |             |            |               |  |
|--|---------------------------|-----------------|-------------|-------------|------------|---------------|--|
|  | ENSRNOT00000053071        | 10806012        | 0.70        | -11         | 0.9        | gr-yel        |  |
|  | ENSRNOT00000053086        | 10811999        | 0.78        | -239        | 4.1        | gr-yel        |  |
|  | ENSRNOT00000053230        | 10758033        | 0.72        | -86         | 4.4        | gr-yel        |  |
|  | ENSRNOT00000053328        | 10855946        | 0.62        | -162        | 0.0        | grey          |  |
|  | ENSRNOT00000053394        | 10900318        | 2.07        | 33          | 0.0        | grey          |  |
|  | <b>ENSRNOT00000053552</b> | <b>10713608</b> | <b>0.70</b> | <b>-209</b> | <b>5.4</b> | <b>gr-yel</b> |  |
|  | ENSRNOT00000053557        | 10916961        | 0.75        | -13         | 0.0        | grey          |  |
|  | ENSRNOT00000054087        | 10864356        | 1.39        | 23          | 0.0        | grey          |  |
|  | <b>ENSRNOT00000054102</b> | <b>10723896</b> | <b>0.73</b> | <b>-66</b>  | <b>4.9</b> | <b>gr-yel</b> |  |
|  | ENSRNOT00000054649        | 10930226        | 0.72        | -146        | 1.7        | ylw           |  |
|  | ENSRNOT00000061295        | 10803438        | 1.35        | 11          | 7.0        | blue          |  |
|  | FQ217306                  | 10825274        | 0.77        | -30         | 0.0        | grey          |  |
|  | ---                       | 10700809        | 1.28        | 15          | 1.4        | purple        |  |
|  | ---                       | 10701541        | 0.77        | -225        | 0.0        | grey          |  |
|  | ---                       | 10700106        | 0.76        | -51         | 0.0        | grey          |  |
|  | ---                       | 10700884        | 0.75        | -28         | 0.0        | grey          |  |
|  | ---                       | 10701591        | 0.60        | -15         | 0.0        | grey          |  |
|  | ---                       | 10700097        | 1.66        | 11          | 0.5        | cyan          |  |
|  | ---                       | 10700775        | 1.31        | 13          | 0.0        | grey          |  |
|  | ---                       | 10701273        | 1.32        | 13          | 0.0        | grey          |  |
|  | ---                       | 10700968        | 1.36        | 13          | 0.5        | black         |  |
|  | ---                       | 10701062        | 1.37        | 14          | 0.0        | grey          |  |
|  | ---                       | 10701563        | 1.47        | 15          | 0.0        | grey          |  |
|  | ---                       | 10700535        | 1.24        | 18          | 4.4        | blue          |  |
|  | ---                       | 10701555        | 1.93        | 18          | 0.0        | grey          |  |
|  | ---                       | 10700957        | 1.53        | 19          | 0.0        | grey          |  |
|  | ---                       | 10701067        | 1.50        | 21          | 0.0        | grey          |  |
|  | ---                       | 10701532        | 1.26        | 22          | 0.0        | grey          |  |
|  | ---                       | 10701619        | 1.66        | 23          | 0.6        | cyan          |  |
|  | ---                       | 10700923        | 1.82        | 24          | 4.3        | blue          |  |
|  | ---                       | 10700608        | 1.24        | 34          | 0.0        | grey          |  |
|  | ---                       | 10700411        | 1.30        | 47          | 2.6        | blue          |  |
|  | ---                       | 10700365        | 1.28        | 79          | 2.0        | mgnt          |  |
|  | ---                       | 10701121        | 1.43        | 89          | 0.0        | grey          |  |
|  | ---                       | 10700854        | 1.32        | 95          | 0.0        | grey          |  |
|  | ---                       | 10701261        | 1.26        | 126         | 0.0        | grey          |  |
|  | ---                       | 10701605        | 1.37        | 325         | 9.0        | blue          |  |
|  | ---                       | 10820008        | 0.74        | -293        | 1.0        | ylw           |  |
|  | ---                       | 10791602        | 0.76        | -22         | 0.0        | grey          |  |
|  | ---                       | 10833416        | 0.76        | -22         | 0.0        | grey          |  |
|  | ---                       | 10834668        | 1.39        | 11          | 0.0        | grey          |  |
|  | ---                       | 10862453        | 1.34        | 116         | 5.5        | blue          |  |
|  | ---                       | 10811898        | 1.30        | 224         | 0.5        | ylw           |  |

### C. Female Liver

| Gene Symbol             | RefSeq/GenBank/<br>Ensemble Number | Affymetrix<br>Probset ID | V/C  | Mean<br>Diff. | k.in | Mod  | Gene Title                                                  |
|-------------------------|------------------------------------|--------------------------|------|---------------|------|------|-------------------------------------------------------------|
| <b>CELL CYCLE</b>       |                                    |                          |      |               |      |      |                                                             |
| Ccnt2                   | NM_001107171                       | 10767280                 | 0.77 | -96           | 14.2 | blue | cyclin T2                                                   |
| <b>CYTOSKELETON-ECM</b> |                                    |                          |      |               |      |      |                                                             |
| Ccbe1                   | ENSRNOT00000034069                 | 10802338                 | 1.33 | 16            | 0.0  | grey | collagen and calcium binding EGF domains 1                  |
| Coil                    | NM_017360                          | 10737403                 | 0.77 | -16           | 0.0  | grey | coilin                                                      |
| Col4a2                  | XM_001076134                       | 10792997                 | 1.24 | 61            | 0.0  | grey | collagen, type IV, alpha 2                                  |
| Col6a1                  | ENSRNOT00000001679                 | 10829437                 | 1.24 | 84            | 0.0  | grey | collagen, type VI, alpha 1                                  |
| Mfap3l                  | NM_001012049                       | 10791474                 | 0.80 | -62           | 0.0  | grey | microfibrillar-associated protein 3-like                    |
| Pfn2                    | NM_030873                          | 10823303                 | 0.81 | -65           | 0.0  | grey | profilin 2                                                  |
| <b>DEVELOPMENT</b>      |                                    |                          |      |               |      |      |                                                             |
| LOC683626               | NM_001129880                       | 10888608                 | 1.57 | 129           | 0.0  | grey | similar to limb-bud and heart                               |
| Robo1                   | NM_022188                          | 10749892                 | 1.22 | 10            | 0.0  | grey | roundabout homolog 1 (Drosophila)                           |
| Serpinh1                | NM_017173                          | 10723884                 | 1.25 | 209           | 0.0  | grey | serine (or cysteine) peptidase inhibitor, clade H, member 1 |
| Skil                    | ENSRNOT00000013191                 | 10822637                 | 0.73 | -69           | 3.7  | brwn | SKI-like oncogene                                           |
| Wdr37                   | NM_001107362                       | 10795969                 | 0.82 | -39           | 0.0  | grey | WD repeat domain 37                                         |
| <b>EPIGENETICS</b>      |                                    |                          |      |               |      |      |                                                             |
| Pcgf6                   | NM_001013154                       | 10730624                 | 0.77 | -19           | 0.0  | grey | polycomb group ring finger 6                                |
| <b>IMMUNE RESPONSE</b>  |                                    |                          |      |               |      |      |                                                             |
| Klra17                  | NM_001172088                       | 10866098                 | 0.67 | -47           | 0.0  | grey | killer cell lectin-like receptor, subfamily A, member 17    |
| Orm1                    | NM_053288                          | 10869476                 | 0.79 | -21           | 0.0  | grey | orosomuroid 1                                               |

| METABOLISM & TRANSPORT             |                     |          |      |      |     |        |                                                                                                |
|------------------------------------|---------------------|----------|------|------|-----|--------|------------------------------------------------------------------------------------------------|
| Alas2                              | NM_013197           | 10932912 | 1.54 | 60   | 3.0 | m-blu  | aminolevulinatase, delta-, synthase 2                                                          |
| Aof1                               | NM_001107343        | 10797741 | 0.83 | -17  | 0.0 | grey   | amine oxidase (flavin containing) domain 1                                                     |
| Apoa2                              | NM_013112           | 10765530 | 1.22 | 10   | 0.0 | grey   | apolipoprotein A-II                                                                            |
| Cln4-2                             | NM_022198           | 10933259 | 0.81 | -16  | 0.0 | grey   | chloride channel 4-2                                                                           |
| Ctps2                              | NM_001034998        | 10937777 | 0.68 | -159 | 0.6 | mgnt   | CTP synthase II                                                                                |
| Hao1                               | NM_001107780        | 10850190 | 0.78 | -10  | 0.0 | grey   | hydroxyacid oxidase (glycolate oxidase) 1                                                      |
| Inmt                               | NM_001109022        | 10862694 | 1.24 | 15   | 0.0 | grey   | indolethylamine N-methyltransferase                                                            |
| Kynu                               | NM_053902           | 10836019 | 0.80 | -18  | 0.0 | grey   | kynureninase (L-kynurenine hydrolase)                                                          |
| Mblac2                             | NM_001108934        | 10812343 | 0.78 | -28  | 0.0 | grey   | metallo-beta-lactamase domain containing 2                                                     |
| Pigl                               | NM_138901           | 10734306 | 0.69 | -28  | 0.0 | grey   | phosphatidylinositol glycan anchor biosynthesis, class L                                       |
| Pop4                               | NM_001009642        | 10721191 | 0.81 | -38  | 0.0 | grey   | processing of precursor 4, ribonuclease P/MRP subunit (S. cerevisiae)                          |
| Sh3bgrl3                           | NM_001106688        | 10880436 | 1.26 | 58   | 0.0 | grey   | SH3 domain binding glutamic acid-rich protein-like 3                                           |
| Slc25a45                           | ENSRNOT00000051979  | 10713152 | 0.76 | -31  | 0.0 | grey   | solute carrier family 25, member 45                                                            |
| Slc28a2                            | NM_031664           | 10849275 | 0.57 | -173 | 0.0 | grey   | solute carrier family 28 (sodium-coupled nucleoside transporter), member 2                     |
| Slc6a6                             | NM_017206           | 10857314 | 0.70 | -217 | 0.0 | grey   | solute carrier family 6 (neurotransmitter transporter, taurine), member 6                      |
| Sod1                               | NM_017050           | 10753005 | 1.23 | 345  | 0.0 | grey   | superoxide dismutase 1, soluble                                                                |
| Trub1                              | NM_001012173        | 10716320 | 0.83 | -18  | 0.0 | grey   | TruB pseudouridine (psi) synthase homolog 1 (E. coli)                                          |
| PROTEOLYSIS                        |                     |          |      |      |     |        |                                                                                                |
| Dcun1d4                            | NM_001108359        | 10776536 | 0.83 | -58  | 0.0 | grey   | DCN1, defective in cullin neddylation 1, domain containing 4 (S. cerevisiae)                   |
| Pgpep1                             | NM_201988           | 10787507 | 0.83 | -66  | 0.5 | l-cn   | pyroglutamyl-peptidase I                                                                       |
| RECEPTORS & BINDING PROTEINS       |                     |          |      |      |     |        |                                                                                                |
| Cxadr                              | NM_053570           | 10749983 | 0.82 | -56  | 1.4 | l-grn  | coxsackie virus and adenovirus receptor                                                        |
| Fabp2                              | NM_013068           | 10818846 | 0.52 | -12  | 0.0 | grey   | fatty acid binding protein 2, intestinal                                                       |
| SIGNALING                          |                     |          |      |      |     |        |                                                                                                |
| Drg2                               | ENSRNOT00000005101  | 10734069 | 0.83 | -71  | 0.0 | grey   | developmentally regulated GTP binding protein 2                                                |
| Pex3                               | NM_031350           | 10716910 | 0.77 | -81  | 0.0 | grey   | peroxisomal biogenesis factor 3                                                                |
| Rgs16                              | NM_001077589        | 10764773 | 1.40 | 18   | 0.0 | grey   | regulator of G-protein signaling 16                                                            |
| Rragd                              | NM_001106641        | 10868125 | 0.76 | -36  | 0.0 | grey   | Ras-related GTP binding D                                                                      |
| TRANSCRIPTION                      |                     |          |      |      |     |        |                                                                                                |
| Gtf2a2                             | NM_053345           | 10911309 | 0.71 | -52  | 3.6 | turq   | general transcription factor IIA, 2                                                            |
| Gtf3c3                             | NM_001108239        | 10928034 | 0.72 | -80  | 4.3 | turq   | general transcription factor IIIC, polypeptide 3                                               |
| LOC100364077                       | ENSRNOT00000006672  | 10924669 | 0.77 | -14  | 3.9 | brwn   | UTP14, U3 small nucleolar ribonucleoprotein, homolog B-like                                    |
| Morc2                              | NM_001106016        | 10773725 | 1.20 | 21   | 0.0 | grey   | MORC family CW-type zinc finger 2                                                              |
| Rai14                              | NM_001011947        | 10821924 | 0.80 | -23  | 0.0 | grey   | retinoic acid induced 14                                                                       |
| Zfp212                             | ENSRNOT00000009054  | 10855203 | 0.83 | -15  | 2.4 | blue   | Zinc finger protein 212                                                                        |
| Zfp3                               | NM_001109034        | 10735375 | 0.73 | -25  | 0.0 | grey   | zinc finger protein 3                                                                          |
| TRANSLATION & PROTEIN MODIFICATION |                     |          |      |      |     |        |                                                                                                |
| Rps14                              | NM_022672           | 10871997 | 1.26 | 309  | 2.8 | gr-yel | ribosomal protein S14                                                                          |
| Rpsa                               | NM_017138           | 10772950 | 1.21 | 113  | 0.7 | l-cn   | ribosomal protein SA                                                                           |
| MISCELLANEOUS & UNKNOWN            |                     |          |      |      |     |        |                                                                                                |
| Fam175b                            | NM_001106307        | 10711723 | 0.78 | -97  | 0.0 | grey   | family with sequence similarity 175, member B                                                  |
| LOC686092                          | ENSRNOT000000050090 | 10923334 | 1.22 | 109  | 0.8 | gr-yel | similar to UPF0197 protein C11orf10 homolog                                                    |
| Ttc21b                             | NM_001191737        | 10845829 | 0.74 | -42  | 0.0 | grey   | tetratricopeptide repeat domain 21B                                                            |
| EST's                              |                     |          |      |      |     |        |                                                                                                |
| LOC100364132                       | XM_002727520        | 10931172 | 0.81 | -11  | 0.0 | grey   | rCG42947-like                                                                                  |
| RGD1304792                         | NM_001134554        | 10856502 | 0.79 | -12  | 0.0 | grey   | similar to chromosome 2 open reading frame 3; transcription factor 9 (binds GC-rich sequences) |
| RGD1305014                         | BC083846            | 10726244 | 0.71 | -23  | 1.3 | brwn   | similar to RIKEN cDNA 2310057M21                                                               |
|                                    | ENSRNOT000000060617 | 10844248 | 1.32 | 30   | 0.0 | grey   |                                                                                                |
|                                    | ENSRNOT000000058436 | 10788858 | 0.71 | -201 | 0.0 | grey   |                                                                                                |
|                                    | ENSRNOT000000056863 | 10838153 | 1.34 | 22   | 0.0 | grey   |                                                                                                |
|                                    | ENSRNOT000000054530 | 10805787 | 1.56 | 553  | 0.0 | grey   |                                                                                                |
|                                    | ENSRNOT000000054339 | 10851378 | 1.37 | 14   | 2.5 | gr-yel |                                                                                                |
|                                    | ENSRNOT000000053902 | 10827450 | 1.44 | 988  | 0.0 | grey   |                                                                                                |
|                                    | ENSRNOT000000053444 | 10824409 | 0.73 | -16  | 0.0 | grey   |                                                                                                |
|                                    | ENSRNOT000000053325 | 10711125 | 1.59 | 68   | 1.9 | gr-yel |                                                                                                |
|                                    | ENSRNOT000000053318 | 10727082 | 1.25 | 26   | 1.8 | gr-yel |                                                                                                |
|                                    | ENSRNOT000000052628 | 10834602 | 1.90 | 357  | 0.0 | grey   |                                                                                                |
|                                    | ENSRNOT000000045655 | 10794749 | 1.30 | 109  | 0.0 | grey   |                                                                                                |
|                                    | ENSRNOT000000044978 | 10894302 | 0.83 | -14  | 0.0 | grey   |                                                                                                |
|                                    | ENSRNOT000000041882 | 10791650 | 1.37 | 338  | 0.0 | grey   |                                                                                                |
|                                    | ENSRNOT000000037015 | 10846604 | 0.69 | -61  | 0.0 | grey   |                                                                                                |
|                                    | ENSRNOT000000030103 | 10716570 | 0.82 | -10  | 0.0 | grey   |                                                                                                |
|                                    | ENSRNOT000000024645 | 10706363 | 0.79 | -30  | 0.0 | grey   |                                                                                                |
|                                    | ENSRNOT000000011530 | 10891878 | 0.72 | -29  | 0.0 | grey   |                                                                                                |
|                                    | ---                 | 10700280 | 0.47 | -41  | 0.0 | grey   |                                                                                                |
|                                    | ---                 | 10701202 | 1.67 | 15   | 0.0 | grey   |                                                                                                |
|                                    | ---                 | 10701117 | 1.70 | 33   | 0.0 | grey   |                                                                                                |

|     |          |      |      |     |       |  |
|-----|----------|------|------|-----|-------|--|
| --- | 10700358 | 0.73 | -119 | 0.0 | grey  |  |
| --- | 10700911 | 0.54 | -38  | 0.0 | grey  |  |
| --- | 10701026 | 0.67 | -36  | 0.0 | grey  |  |
| --- | 10700351 | 0.65 | -33  | 0.0 | grey  |  |
| --- | 10700508 | 0.61 | -29  | 6.4 | blue  |  |
| --- | 10700964 | 0.71 | -29  | 0.0 | grey  |  |
| --- | 10700072 | 0.57 | -28  | 0.0 | grey  |  |
| --- | 10700282 | 0.56 | -26  | 3.9 | blue  |  |
| --- | 10700402 | 0.71 | -24  | 0.0 | grey  |  |
| --- | 10701484 | 0.74 | -18  | 0.0 | grey  |  |
| --- | 10701191 | 0.66 | -15  | 2.0 | blue  |  |
| --- | 10701192 | 0.79 | -14  | 0.0 | grey  |  |
| --- | 10700826 | 0.77 | -13  | 7.1 | blue  |  |
| --- | 10700483 | 0.72 | -11  | 0.0 | grey  |  |
| --- | 10700117 | 1.25 | 10   | 0.7 | black |  |
| --- | 10700768 | 1.40 | 12   | 0.9 | m-blu |  |
| --- | 10700999 | 1.59 | 18   | 0.0 | grey  |  |
| --- | 10700958 | 1.90 | 20   | 0.0 | grey  |  |
| --- | 10701309 | 1.46 | 418  | 0.0 | grey  |  |
| --- | 10861211 | 0.64 | -14  | 0.0 | grey  |  |
| --- | 10854030 | 2.04 | 14   | 0.0 | grey  |  |
| --- | 10874328 | 1.33 | 34   | 0.0 | grey  |  |
| --- | 10868796 | 1.45 | 38   | 0.0 | grey  |  |

#### D. Ovary

| Gene Symbol             | RefSeq/GenBank/<br>Ensemble Number | Affymetrix<br>Probset ID | V/C  | Mean<br>Diff. | k.in | Mod   | Gene Title                                                                |
|-------------------------|------------------------------------|--------------------------|------|---------------|------|-------|---------------------------------------------------------------------------|
| <b>APOPTOSIS</b>        |                                    |                          |      |               |      |       |                                                                           |
| Traf3ip2                | NM_001044248                       | 10830398                 | 0.74 | -19           | 3.5  | brwn  | Traf3 interacting protein 2                                               |
| <b>CELL CYCLE</b>       |                                    |                          |      |               |      |       |                                                                           |
| Cep350                  | ENSRNOT0000005235                  | 10768874                 | 1.34 | 47            | 8.5  | brwn  | centrosomal protein 350kDa                                                |
| <b>CYTOSKELETON-ECM</b> |                                    |                          |      |               |      |       |                                                                           |
| Cgnl1                   | NM_001108164                       | 10918600                 | 1.31 | 85            | 0.0  | grey  | cingulin-like 1                                                           |
| Csrp2                   | NM_177425                          | 10833152                 | 1.37 | 25            | 0.0  | grey  | cysteine and glycine-rich protein 2                                       |
| Esco1                   | BC166441                           | 10803194                 | 1.30 | 41            | 0.0  | grey  | establishment of cohesion 1 homolog 1 (S. cerevisiae)                     |
| Odf1                    | NM_024126                          | 10896227                 | 2.23 | 24            | 13.6 | ylw   | outer dense fiber of sperm tails 1                                        |
| Odf2                    | NM_017213                          | 10835005                 | 1.29 | 26            | 7.7  | ylw   | outer dense fiber of sperm tails 2                                        |
| RGD1563284              | ENSRNOT00000059800                 | 10787814                 | 1.34 | 12            | 0.0  | grey  | similar to actin                                                          |
| Smc1a                   | NM_031683                          | 10933138                 | 1.21 | 94            | 1.6  | green | structural maintenance of chromosomes 1A                                  |
| Ttl12                   | NM_001135922                       | 10905827                 | 1.24 | 14            | 0.0  | grey  | tubulin tyrosine ligase-like family, member 12                            |
| <b>DEVELOPMENT</b>      |                                    |                          |      |               |      |       |                                                                           |
| Auts2                   | ENSRNOT00000044800                 | 10761299                 | 0.76 | -10           | 1.1  | pink  | autism susceptibility candidate 2                                         |
| Crisp2                  | NM_001011710                       | 10922027                 | 3.67 | 29            | 17.0 | ylw   | cysteine-rich secretory protein 2                                         |
| Emg1                    | NM_001107888                       | 10865452                 | 1.27 | 85            | 1.0  | l-yl  | EMG1 nucleolar protein homolog (S. cerevisiae)                            |
| Far1                    | NM_001011933                       | 10710051                 | 1.24 | 92            | 0.0  | grey  | fatty acyl CoA reductase 1                                                |
| Llgl2                   | NM_001127549                       | 10739642                 | 0.81 | -20           | 0.0  | grey  | lethal giant larvae homolog 2 (Drosophila)                                |
| Lrrc26                  | NM_001014053                       | 10834187                 | 0.67 | -10           | 0.0  | grey  | leucine rich repeat containing 26                                         |
| Lrrc8b                  | NM_001107204                       | 10775278                 | 1.25 | 23            | 0.0  | grey  | leucine rich repeat containing 8 family, member B                         |
| Mkks                    | NM_001008353                       | 10850221                 | 1.27 | 35            | 4.6  | brwn  | McKusick-Kaufman syndrome                                                 |
| Smcp                    | NM_031536                          | 10824742                 | 3.33 | 29            | 14.4 | ylw   | sperm mitochondria-associated cysteine-rich protein                       |
| Syt11                   | NM_031667                          | 10824349                 | 1.39 | 17            | 0.0  | grey  | synaptotagmin XI                                                          |
| Syt12                   | BC168993                           | 10708591                 | 0.79 | -27           | 0.0  | grey  | synaptotagmin-like 2                                                      |
| Tmub1                   | NM_001080153                       | 10852892                 | 1.27 | 21            | 3.2  | black | transmembrane and ubiquitin-like domain containing 1                      |
| Urb2                    | NM_001135708                       | 10808764                 | 1.32 | 18            | 2.5  | ylw   | URB2 ribosome biogenesis 2 homolog (S. cerevisiae)                        |
| <b>EPIGENETICS</b>      |                                    |                          |      |               |      |       |                                                                           |
| Asmtl                   | NM_001105915                       | 10757162                 | 1.22 | 19            | 0.7  | coral | acetylserotonin O-methyltransferase-like                                  |
| Dnmt1                   | NM_053354                          | 10915437                 | 1.22 | 25            | 0.0  | grey  | DNA (cytosine-5-)-methyltransferase 1                                     |
| Icmt                    | NM_133310                          | 10874319                 | 1.23 | 22            | 1.1  | black | isoprenylcysteine carboxyl methyltransferase                              |
| Prm1                    | NM_001002850                       | 10731498                 | 1.33 | 13            | 9.1  | ylw   | protamine 1                                                               |
| Rg9mtd1                 | NM_001008337                       | 10750795                 | 1.45 | 41            | 3.3  | brwn  | RNA (guanine-9-) methyltransferase domain containing 1                    |
| Tnp1                    | NM_017056                          | 10928844                 | 4.07 | 35            | 13.2 | ylw   | transition protein 1                                                      |
| <b>GOLGI APPARATUS</b>  |                                    |                          |      |               |      |       |                                                                           |
| Ap1s1                   | NM_001108331                       | 10761042                 | 1.21 | 36            | 0.6  | coral | adaptor-related protein complex 1, sigma 1 subunit                        |
| Gbf1                    | NM_001191634                       | 10715746                 | 1.20 | 69            | 0.0  | grey  | golgi-specific brefeldin A resistant guanine nucleotide exchange factor 1 |
| <b>GROWTH FACTORS</b>   |                                    |                          |      |               |      |       |                                                                           |
| Bmp6                    | NM_013107                          | 10797949                 | 1.33 | 19            | 0.0  | grey  | bone morphogenetic protein 6                                              |
| Cmtm2a                  | NM_001013142                       | 10805724                 | 1.73 | 12            | 13.5 | ylw   | CKLF-like MARVEL transmembrane domain containing 2A                       |

|                                         |                     |                 |             |             |             |              |                                                                                |
|-----------------------------------------|---------------------|-----------------|-------------|-------------|-------------|--------------|--------------------------------------------------------------------------------|
| Jag1                                    | NM_019147           | 10850228        | 1.66        | 65          | 4.3         | green        | jagged 1                                                                       |
| Npy                                     | NM_012614           | 10855506        | 1.53        | 41          | 0.0         | grey         | neuropeptide Y                                                                 |
| <b>IMMUNE RESPONSE</b>                  |                     |                 |             |             |             |              |                                                                                |
| Cd226                                   | NM_001107370        | 10803110        | 1.48        | 13          | 0.0         | grey         | CD226 molecule                                                                 |
| Ifi44l                                  | XM_227820           | 10834014        | 1.25        | 40          | 0.0         | grey         | interferon-induced protein 44-like                                             |
| Klr1c                                   | NM_001085403        | 10859095        | 1.31        | 11          | 0.0         | grey         | killer cell lectin-like receptor subfamily B member 1C                         |
| Klr1                                    | NM_001012649        | 10866067        | 1.34        | 20          | 0.0         | grey         | killer cell lectin-like receptor family I member 1                             |
| Lage3                                   | NM_001106345        | 10936072        | 1.31        | 58          | 1.0         | brwn         | L antigen family, member 3                                                     |
| <b>METABOLISM &amp; TRANSPORT</b>       |                     |                 |             |             |             |              |                                                                                |
| Abhd2                                   | NM_001106275        | 10708053        | 1.36        | 108         | 0.9         | tan          | abhydrolase domain containing 2                                                |
| Alas2                                   | NM_013197           | 10932912        | 1.55        | 61          | 3.0         | m-blu        | aminolevulinic acid, delta-, synthase 2                                        |
| Aldob                                   | NM_012496           | 10876719        | 1.46        | 75          | 0.0         | grey         | aldolase B, fructose-bisphosphate                                              |
| B4gal5                                  | NM_001108608        | 10851952        | 1.34        | 31          | 0.0         | grey         | UDP-Gal:betaGlcNAc beta 1,4-galactosyltransferase, polypeptide 5               |
| Car14                                   | NM_001109655        | 10825100        | 0.74        | -49         | 2.8         | brwn         | carbonic anhydrase 14                                                          |
| Ces6                                    | NM_144743           | 10808984        | 0.82        | -12         | 0.9         | brwn         | carboxylesterase 6                                                             |
| Elov6                                   | NM_134383           | 10819005        | 1.67        | 51          | 3.1         | green        | ELOVL family member 6, elongation of long chain fatty acids (yeast)            |
| Exosc3                                  | NM_001107936        | 10876520        | 1.24        | 29          | 0.0         | grey         | exosome component 3                                                            |
| Hba-a2                                  | NM_013096           | 10741756        | 1.24        | 1647        | 4.5         | m-blu        | hemoglobin alpha, adult chain 2                                                |
| <b>Hbb</b>                              | <b>NM_033234</b>    | <b>10724315</b> | <b>1.69</b> | <b>1134</b> | <b>4.7</b>  | <b>m-blu</b> | <b>hemoglobin, beta</b>                                                        |
| Hbb-b1                                  | NM_198776           | 10724319        | 1.46        | 759         | 4.5         | m-blu        | hemoglobin, beta adult major chain                                             |
| Lin7c                                   | NM_021851           | 10838346        | 1.20        | 127         | 4.6         | brwn         | lin-7 homolog C (C. elegans)                                                   |
| LOC678704                               | NM_001109369        | 10751769        | 1.23        | 199         | 7.7         | brwn         | hypothetical protein LOC678704                                                 |
| <b>LOC689064</b>                        | <b>NM_00111269</b>  | <b>10724311</b> | <b>1.44</b> | <b>850</b>  | <b>4.9</b>  | <b>m-blu</b> | <b>beta-globin</b>                                                             |
| Mepce                                   | NM_001100678        | 10761020        | 1.30        | 24          | 3.4         | black        | methylphosphate capping enzyme                                                 |
| Ndufb4                                  | NM_001037338        | 10839229        | 0.83        | -135        | 2.5         | black        | NADH dehydrogenase (ubiquinone) 1 beta subcomplex 4                            |
| <b>Oaz3</b>                             | <b>NM_001101018</b> | <b>10824814</b> | <b>2.09</b> | <b>18</b>   | <b>15.4</b> | <b>ylw</b>   | <b>ornithine decarboxylase antizyme 3</b>                                      |
| Pigm                                    | NM_024144           | 10765744        | 1.26        | 69          | 0.0         | grey         | phosphatidylinositol glycan anchor biosynthesis, class M                       |
| Ptges2                                  | NM_001107832        | 10835597        | 1.32        | 41          | 0.0         | grey         | prostaglandin E synthase 2                                                     |
| Pts                                     | NM_017220           | 10917209        | 1.33        | 22          | 0.0         | grey         | 6-pyruvoyl-tetrahydropterin synthase                                           |
| Pus3                                    | NM_001108134        | 10908990        | 1.27        | 20          | 6.6         | brwn         | pseudouridylate synthase 3                                                     |
| Slc30a1                                 | NM_022853           | 10766774        | 1.33        | 68          | 0.4         | tan          | solute carrier family 30 (zinc transporter), member 1                          |
| Slc7a5                                  | NM_017353           | 10811531        | 1.37        | 29          | 0.0         | grey         | solute carrier family 7 (cationic amino acid transporter, y+ system), member 5 |
| Uap1                                    | NM_001191930        | 10769715        | 1.32        | 41          | 1.1         | pink         | UDP-N-acetylglucosamine pyrophosphorylase 1                                    |
| Umps                                    | NM_001025402        | 10751586        | 1.21        | 50          | 0.0         | grey         | uridine monophosphate synthetase                                               |
| <b>PROTEOLYSIS</b>                      |                     |                 |             |             |             |              |                                                                                |
| LOC100360708                            | ENSRNOT00000049610  | 10873723        | 1.54        | 13          | 0.0         | grey         | ubiquitin A-52 residue ribosomal protein fusion product 1                      |
| <b>RECEPTORS &amp; BINDING PROTEINS</b> |                     |                 |             |             |             |              |                                                                                |
| Abcc9                                   | NM_013040           | 10866724        | 1.25        | 42          | 0.0         | grey         | ATP-binding cassette, sub-family C (CFTR/MRP), member 9                        |
| Abcg2                                   | NM_181381           | 10855862        | 1.20        | 17          | 2.9         | brwn         | ATP-binding cassette, sub-family G (WHITE), member 2                           |
| Leprotl1                                | NM_001013188        | 10788553        | 1.21        | 48          | 0.0         | grey         | leptin receptor overlapping transcript-like 1                                  |
| Nab2                                    | NM_001134874        | 10903166        | 1.22        | 12          | 0.0         | grey         | Ngf-A binding protein 2                                                        |
| Rybp                                    | NM_001107879        | 10864441        | 1.21        | 20          | 1.7         | ylw          | RING1 and YY1 binding protein                                                  |
| <b>Trip11</b>                           | <b>NM_001191772</b> | <b>10891795</b> | <b>1.20</b> | <b>46</b>   | <b>9.0</b>  | <b>brwn</b>  | <b>thyroid hormone receptor interactor 11</b>                                  |
| <b>SIGNALING</b>                        |                     |                 |             |             |             |              |                                                                                |
| Camsap1l1                               | NM_001134503        | 10768093        | 1.20        | 49          | 0.6         | tan          | calmodulin regulated spectrin-associated protein 1-like 1                      |
| Elt1                                    | NM_022294           | 10819770        | 1.35        | 90          | 0.0         | grey         | EGF, latrophilin and seven transmembrane domain containing 1                   |
| Enpp6                                   | NM_001107311        | 10791631        | 1.67        | 21          | 0.0         | grey         | ectonucleotide pyrophosphatase/phosphodiesterase 6                             |
| Ensa                                    | NM_001033974        | 10834035        | 1.21        | 29          | 0.0         | grey         | endosulfine alpha                                                              |
| Ern1                                    | NM_001191926        | 10748314        | 1.30        | 27          | 0.0         | grey         | endoplasmic reticulum to nucleus signaling 1                                   |
| Gng11                                   | NM_022396           | 10853554        | 1.29        | 19          | 0.0         | grey         | guanine nucleotide binding protein (G protein), gamma 11                       |
| Gnl3l                                   | NM_001081958        | 10937540        | 1.21        | 74          | 1.1         | l-yl         | guanine nucleotide binding protein-like 3 (nucleolar)-like                     |
| Hpcal1                                  | NM_017356           | 10883801        | 1.23        | 31          | 0.0         | grey         | hippocalcin-like 1                                                             |
| Ikkg                                    | NM_199103           | 10936134        | 1.22        | 31          | 0.0         | grey         | inhibitor of kappaB kinase gamma                                               |
| Ippk                                    | NM_001008556        | 10797681        | 1.28        | 15          | 1.4         | pink         | inositol 1,3,4,5,6-pentakisphosphate 2-kinase                                  |
| Lpin1                                   | NM_001012111        | 10889269        | 1.23        | 37          | 0.0         | grey         | lipin 1                                                                        |
| Ppp1r10                                 | NM_022951           | 10830989        | 1.20        | 26          | 0.0         | grey         | protein phosphatase 1, regulatory subunit 10                                   |
| Ppp1r9b                                 | NM_053474           | 10737587        | 1.25        | 37          | 0.0         | grey         | protein phosphatase 1, regulatory subunit 9B                                   |
| tGap1                                   | NM_001007635        | 10814217        | 1.59        | 10          | 7.6         | ylw          | GTPase activating protein testicular GAP1                                      |
| Traf3ip3                                | NM_001014132        | 10766806        | 1.21        | 11          | 0.0         | grey         | TRAF3 interacting protein 3                                                    |
| Trib1                                   | NM_023985           | 10896793        | 1.28        | 28          | 0.6         | l-cn         | tribbles homolog 1 (Drosophila)                                                |
| <b>TRANSCRIPTION</b>                    |                     |                 |             |             |             |              |                                                                                |
| Ankrd49                                 | NM_001126283        | 10915000        | 1.28        | 44          | 5.4         | brwn         | ankyrin repeat domain 49                                                       |
| Asb2                                    | NM_001011984        | 10891888        | 0.78        | -16         | 0.0         | grey         | ankyrin repeat and SOCS box-containing 2                                       |
| Bmyc                                    | NM_001013163        | 10834360        | 1.22        | 26          | 0.0         | grey         | brain expressed myelocytomatosis oncogene                                      |
| Btg1                                    | NM_017258           | 10895069        | 1.26        | 194         | 0.0         | grey         | B-cell translocation gene 1, anti-proliferative                                |
| Bwk1                                    | NM_198743           | 10842879        | 1.23        | 86          | 2.6         | pink         | Bwk1 leukemia-related gene                                                     |
| Ccdc6                                   | ENSRNOT00000032159  | 10832705        | 1.22        | 20          | 0.0         | grey         | coiled-coil domain containing 6                                                |
| Ccdc7                                   | NM_001011561        | 10812061        | 1.65        | 11          | 8.1         | ylw          | coiled-coil domain containing 7                                                |
| Ddx18                                   | NM_001006996        | 10767189        | 1.30        | 68          | 4.4         | brwn         | DEAD (Asp-Glu-Ala-Asp) box polypeptide 18                                      |

|                                               |                     |                 |             |           |            |             |                                                                                       |
|-----------------------------------------------|---------------------|-----------------|-------------|-----------|------------|-------------|---------------------------------------------------------------------------------------|
| <b>Ddx21</b>                                  | <b>NM_001037201</b> | <b>10937499</b> | <b>1.25</b> | <b>83</b> | <b>2.4</b> | <b>l-yl</b> | <b>DEAD (Asp-Glu-Ala-Asp) box polypeptide 21 (chrX)</b>                               |
| Ddx21                                         | NM_001037201        | 10833198        | 1.25        | 84        | 1.6        | l-yl        | DEAD (Asp-Glu-Ala-Asp) box polypeptide 21 (chr20)                                     |
| E2f5                                          | ENSRNOT00000014361  | 10822258        | 1.23        | 15        | 0.9        | pink        | E2F transcription factor 5                                                            |
| Elf4                                          | NM_001191735        | 10939584        | 1.29        | 15        | 0.0        | grey        | E74-like factor 4 (ets domain transcription factor)                                   |
| Fbxl17                                        | NM_001108235        | 10930210        | 1.27        | 13        | 2.3        | black       | F-box and leucine-rich repeat protein 17                                              |
| Foxp1                                         | NM_001034131        | 10864404        | 0.81        | -39       | 0.0        | grey        | forkhead box P1                                                                       |
| Foxp2                                         | ENSRNOT00000034078  | 10853783        | 0.63        | -12       | 3.9        | blue        | forkhead box P2                                                                       |
| Hivep2                                        | NM_024137           | 10701830        | 1.28        | 18        | 0.0        | grey        | human immunodeficiency virus type I enhancer binding protein 2                        |
| LOC499900                                     | BC079070            | 10840379        | 1.29        | 19        | 0.0        | grey        | similar to Zinc finger protein 133                                                    |
| Med30                                         | NM_001130539        | 10896515        | 1.20        | 46        | 0.0        | grey        | mediator complex subunit 30                                                           |
| Mtf1                                          | NM_001108677        | 10871857        | 1.24        | 21        | 1.7        | ylw         | metal-regulatory transcription factor 1                                               |
| Mtvr2                                         | NM_001015013        | 10727999        | 1.21        | 38        | 1.6        | black       | mammary tumor virus receptor 2                                                        |
| Nip7                                          | NM_138847           | 10807625        | 1.25        | 26        | 0.0        | grey        | nuclear import 7 homolog ( <i>S. cerevisiae</i> )                                     |
| <b>Noc3l</b>                                  | <b>NM_001108523</b> | <b>10729999</b> | <b>1.24</b> | <b>30</b> | <b>8.6</b> | <b>brwn</b> | <b>nucleolar complex associated 3 homolog (<i>S. cerevisiae</i>)</b>                  |
| Nol10                                         | NM_001014076        | 10883763        | 1.25        | 30        | 7.7        | brwn        | nucleolar protein 10                                                                  |
| Ppara                                         | NM_013196           | 10898359        | 1.29        | 35        | 3.0        | black       | peroxisome proliferator activated receptor alpha                                      |
| RGD1562997                                    | ENSRNOT00000037955  | 10800323        | 1.35        | 23        | 2.2        | brwn        | similar to Transcription initiation factor TFIID 105 kDa subunit (TAFII-105)          |
| Set                                           | NM_001012504        | 10749869        | 0.74        | -88       | 3.4        | black       | SET nuclear oncogene                                                                  |
| Tada2b                                        | NM_001170455        | 10773358        | 1.25        | 23        | 2.9        | black       | transcriptional adaptor 2 (ADA2 homolog, yeast)-beta                                  |
| Vhl                                           | NM_052801           | 10857887        | 1.24        | 35        | 0.0        | grey        | von Hippel-Lindau tumor suppressor                                                    |
| Zdhhc13                                       | NM_001039037        | 10707156        | 1.20        | 27        | 0.0        | grey        | zinc finger, DHHC-type containing 13                                                  |
| Zdhhc21                                       | NM_001039009        | 10877772        | 1.23        | 34        | 3.7        | brwn        | zinc finger, DHHC-type containing 21                                                  |
| Zfp35                                         | NM_001013141        | 10800493        | 1.29        | 30        | 5.9        | turq        | zinc finger protein 35                                                                |
| Zufsp                                         | NM_001008308        | 10833265        | 1.30        | 22        | 0.0        | grey        | zinc finger with UFM1-specific peptidase domain                                       |
| <b>TRANSLATION &amp; PROTEIN MODIFICATION</b> |                     |                 |             |           |            |             |                                                                                       |
| Arf2                                          | NM_024150           | 10738716        | 1.24        | 39        | 0.0        | grey        | ADP-ribosylation factor 2                                                             |
| Bms1                                          | NM_001100751        | 10864942        | 1.24        | 34        | 0.0        | grey        | BMS1 homolog, ribosome assembly protein (yeast)                                       |
| Clp1                                          | NM_001009599        | 10846846        | 1.25        | 28        | 1.1        | ylw         | CLP1, cleavage and polyadenylation factor I subunit, homolog ( <i>S. cerevisiae</i> ) |
| Cpsf2                                         | NM_001106753        | 10886414        | 1.23        | 43        | 0.0        | grey        | cleavage and polyadenylation specific factor 2                                        |
| Drap1                                         | NM_001077668        | 10727846        | 1.20        | 53        | 0.0        | grey        | Dr1 associated protein 1 (negative cofactor 2 alpha)                                  |
| Eef1a2                                        | NM_012660           | 10852464        | 0.79        | -17       | 2.6        | ylw         | eukaryotic translation elongation factor 1 alpha 2                                    |
| Gatc                                          | NM_001108339        | 10758982        | 1.21        | 29        | 0.0        | grey        | glutamyl-tRNA(Gln) amidotransferase, subunit C homolog (bacterial)                    |
| <b>Lars</b>                                   | <b>NM_001009637</b> | <b>10804187</b> | <b>1.25</b> | <b>85</b> | <b>8.7</b> | <b>brwn</b> | <b>leucyl-tRNA synthetase</b>                                                         |
| LOC690096                                     | ENSRNOT00000012255  | 10774432        | 0.78        | -25       | 1.9        | ylw         | similar to ribosomal protein L28                                                      |
| Mrpl49                                        | NM_001047883        | 10728115        | 1.26        | 33        | 0.0        | grey        | mitochondrial ribosomal protein L49                                                   |
| Phax                                          | NM_173133           | 10801810        | 1.20        | 25        | 0.0        | grey        | phosphorylated adaptor for RNA export                                                 |
| Prpf31                                        | NM_001106219        | 10718539        | 1.21        | 27        | 1.3        | green       | PRP31 pre-mRNA processing factor 31 homolog ( <i>S. cerevisiae</i> )                  |
| Qtrtd1                                        | ENSRNOT00000000317  | 10751196        | 1.24        | 11        | 1.2        | l-yl        | queine tRNA-ribosyltransferase domain containing 1                                    |
| Rbm42                                         | NM_001014159        | 10720734        | 1.23        | 17        | 2.5        | black       | RNA binding motif protein 42                                                          |
| RGD1559955                                    | ENSRNOT00000046179  | 10925757        | 1.33        | 10        | 1.7        | ylw         | similar to 40S ribosomal protein S17                                                  |
| Rnaseh2b                                      | NM_001007007        | 10780937        | 1.20        | 35        | 0.0        | grey        | ribonuclease H2, subunit B                                                            |
| Rpl7l1                                        | ENSRNOT00000021803  | 10921527        | 1.25        | 108       | 0.0        | grey        | ribosomal protein L7-like 1                                                           |
| Rrp7a                                         | NM_001130568        | 10905785        | 1.20        | 36        | 0.5        | coral       | ribosomal RNA processing 7 homolog A ( <i>S. cerevisiae</i> )                         |
| Rrp8                                          | NM_001008346        | 10724516        | 1.25        | 11        | 3.4        | brwn        | ribosomal RNA processing 8, methyltransferase, homolog (yeast)                        |
| Snrnp25                                       | ENSRNOT00000067079  | 10741793        | 1.22        | 26        | 0.0        | grey        | small nuclear ribonucleoprotein 25 (U11/U12)                                          |
| Taf9                                          | NM_184048           | 10832879        | 1.36        | 125       | 0.0        | grey        | TAF9 RNA polymerase II, TATA box binding protein (TBP)-associated factor              |
| <b>MISCELLANEOUS &amp; UNKNOWN</b>            |                     |                 |             |           |            |             |                                                                                       |
| Bxdc2                                         | NM_001029915        | 10821914        | 1.23        | 75        | 6.1        | brwn        | brix domain containing 2                                                              |
| Ciao1                                         | NM_001008766        | 10849635        | 1.32        | 78        | 4.1        | ylw         | cytosolic iron-sulfur protein assembly 1 homolog ( <i>S. cerevisiae</i> )             |
| Fam126a                                       | NM_001191969        | 10852953        | 0.82        | -62       | 0.0        | grey        | family with sequence similarity 126, member A                                         |
| Fam96b                                        | NM_001144854        | 10805640        | 1.22        | 46        | 0.6        | l-yl        | family with sequence similarity 96, member B                                          |
| LOC100188933                                  | NM_001134695        | 10833598        | 1.75        | 16        | 6.4        | ylw         | hypothetical protein LOC100188933                                                     |
| LOC314016                                     | ENSRNOT00000006122  | 10884031        | 1.26        | 33        | 0.0        | grey        | similar to mKIAA0230 protein                                                          |
| LOC500034                                     | NM_001109221        | 10861117        | 1.23        | 56        | 0.0        | grey        | similar to CG3570-PA                                                                  |
| LOC500251                                     | NM_001025047        | 10857107        | 1.27        | 20        | 0.0        | grey        | hypothetical protein LOC500251                                                        |
| Nacc1                                         | NM_134413           | 10806677        | 1.27        | 30        | 0.0        | grey        | nucleus accumbens associated 1, BEN and BTB (POZ) domain containing                   |
| RGD1304810                                    | NM_001107314        | 10791983        | 1.36        | 15        | 0.0        | grey        | similar to 6430573F11Rik protein                                                      |
| RGD1308430                                    | BC158656            | 10780237        | 1.26        | 66        | 0.0        | grey        | similar to 1700123O20Rik protein                                                      |
| RGD1311899                                    | BC088751            | 10762735        | 1.30        | 18        | 2.6        | ylw         | similar to RIKEN cDNA 2210016L21 gene                                                 |
| RGD1560175                                    | ENSRNOT00000046208  | 10754077        | 1.23        | 34        | 2.0        | green       | similar to hypothetical protein KIAA2018                                              |
| RGD1564257                                    | NM_001163723        | 10882034        | 0.74        | -13       | 0.0        | grey        | similar to hypothetical protein FLJ32825                                              |
| Spetex-2A                                     | NM_001009976        | 10782383        | 1.60        | 22        | 6.3        | tan         | Spetex-2A protein                                                                     |
| <b>Spetex-2B</b>                              | <b>NM_001011697</b> | <b>10779265</b> | <b>1.50</b> | <b>20</b> | <b>6.9</b> | <b>tan</b>  | <b>Spetex-2B protein</b>                                                              |
| Spetex-2C                                     | NM_001011698        | 10779260        | 1.42        | 17        | 6.2        | tan         | Spetex-2C protein                                                                     |
| Spetex-2D                                     | NM_001011701        | 10782409        | 1.37        | 15        | 6.2        | tan         | Spetex-2D protein                                                                     |
| Spetex-2F                                     | NM_001009968        | 10782379        | 1.36        | 13        | 6.3        | tan         | Spetex-2F protein                                                                     |
| <b>Spetex-2G</b>                              | <b>NM_001009971</b> | <b>10782418</b> | <b>1.41</b> | <b>19</b> | <b>6.6</b> | <b>tan</b>  | <b>Spetex-2G protein</b>                                                              |
| Spg11                                         | NM_001191571        | 10849172        | 1.20        | 35        | 0.0        | grey        | spastic paraplegia 11 (autosomal recessive)                                           |
| Tmem57                                        | NM_001025699        | 10880564        | 1.20        | 33        | 0.0        | grey        | transmembrane protein 57                                                              |

|              |                           |                 |             |             |             |              |                                                                                  |
|--------------|---------------------------|-----------------|-------------|-------------|-------------|--------------|----------------------------------------------------------------------------------|
| Utp23        | NM_001126266              | 10896499        | 1.23        | 12          | 0.4         | tan          | UTP23, small subunit (SSU) processome component, homolog (yeast)                 |
| Utp3         | NM_001012036              | 10776064        | 1.27        | 29          | 0.9         | pink         | UTP3, small subunit (SSU) processome component, homolog ( <i>S. cerevisiae</i> ) |
| <b>EST's</b> |                           |                 |             |             |             |              |                                                                                  |
| LOC304131    | NM_001013979              | 10750074        | 1.44        | 17          | 0.0         | grey         | similar to C21ORF7                                                               |
| MGC105649    | NM_001008518              | 10839307        | 1.43        | 31          | 0.0         | grey         | hypothetical LOC302884                                                           |
| RGD1305158   | BC167112                  | 10875932        | 1.25        | 26          | 1.9         | brwn         | similar to RIKEN cDNA 1810030N24                                                 |
| RGD1562502   | NM_001108818              | 10934548        | 1.31        | 44          | 1.6         | pink         | similar to RIKEN cDNA 2610029G23                                                 |
| RGD1564456   | ENSRNOT00000048933        | 10796094        | 1.23        | 30          | 8.4         | brwn         | similar to chromosome 10 open reading frame 18                                   |
| Mir99a       | NR_031856                 | 10749975        | 0.66        | -33         | 0.0         | grey         | microRNA mir-99a                                                                 |
|              | FQ224515                  | 10823595        | 1.49        | 161         | 1.4         | green        |                                                                                  |
|              | FQ221747                  | 10830328        | 1.28        | 32          | 0.0         | grey         |                                                                                  |
|              | ENSRNOT00000070041        | 10772554        | 1.20        | 13          | 2.2         | green        |                                                                                  |
|              | ENSRNOT00000069150        | 10868277        | 0.73        | -11         | 2.3         | black        |                                                                                  |
|              | ENSRNOT00000068804        | 10840100        | 1.43        | 11          | 2.5         | green        |                                                                                  |
|              | ENSRNOT00000063593        | 10907802        | 0.49        | -17         | 0.9         | pink         |                                                                                  |
|              | ENSRNOT00000062069        | 10852719        | 0.66        | -15         | 0.0         | grey         |                                                                                  |
|              | ENSRNOT00000060731        | 10794222        | 0.81        | -12         | 2.2         | ylw          |                                                                                  |
|              | ENSRNOT00000057163        | 10705411        | 0.76        | -160        | 1.8         | pink         |                                                                                  |
|              | ENSRNOT00000056161        | 10913590        | 0.79        | -16         | 0.0         | grey         |                                                                                  |
|              | ENSRNOT00000055921        | 10849643        | 0.77        | -11         | 2.6         | blue         |                                                                                  |
|              | ENSRNOT00000055499        | 10819298        | 0.78        | -13         | 0.0         | grey         |                                                                                  |
|              | ENSRNOT00000054509        | 10795642        | 0.83        | -13         | 2.2         | tan          |                                                                                  |
|              | ENSRNOT00000054096        | 10764538        | 1.64        | 10          | 0.8         | coral        |                                                                                  |
|              | ENSRNOT00000054014        | 10722427        | 1.50        | 16          | 3.0         | pink         |                                                                                  |
|              | ENSRNOT00000053893        | 10722467        | 1.49        | 17          | 2.6         | pink         |                                                                                  |
|              | <b>ENSRNOT00000053882</b> | <b>10722421</b> | <b>1.43</b> | <b>30</b>   | <b>11.6</b> | <b>pink</b>  |                                                                                  |
|              | ENSRNOT00000053529        | 10722449        | 1.57        | 16          | 0.0         | grey         |                                                                                  |
|              | ENSRNOT00000053496        | 10903998        | 0.75        | -17         | 0.0         | grey         |                                                                                  |
|              | ENSRNOT00000053463        | 10802706        | 0.67        | -26         | 0.0         | grey         |                                                                                  |
|              | ENSRNOT00000053290        | 10778375        | 1.22        | 20          | 0.0         | grey         |                                                                                  |
|              | <b>ENSRNOT00000052822</b> | <b>10868241</b> | <b>1.45</b> | <b>12</b>   | <b>4.5</b>  | <b>black</b> |                                                                                  |
|              | ENSRNOT00000052743        | 10935675        | 1.40        | 11          | 2.3         | black        |                                                                                  |
|              | ENSRNOT00000052635        | 10871773        | 1.54        | 11          | 2.0         | black        |                                                                                  |
|              | <b>ENSRNOT00000052564</b> | <b>10722431</b> | <b>1.45</b> | <b>32</b>   | <b>8.9</b>  | <b>pink</b>  |                                                                                  |
|              | ENSRNOT00000052447        | 10844062        | 1.51        | 19          | 0.0         | grey         |                                                                                  |
|              | ENSRNOT00000052215        | 10773706        | 0.75        | -15         | 0.0         | grey         |                                                                                  |
|              | ENSRNOT00000051417        | 10841412        | 0.82        | -103        | 0.0         | grey         |                                                                                  |
|              | ENSRNOT00000050715        | 10772758        | 0.73        | -107        | 2.3         | black        |                                                                                  |
|              | <b>ENSRNOT0000003532</b>  | <b>10925808</b> | <b>0.78</b> | <b>-11</b>  | <b>3.6</b>  | <b>black</b> |                                                                                  |
|              | ENSRNOT00000032824        | 10760514        | 0.82        | -23         | 0.0         | grey         |                                                                                  |
|              | ENSRNOT00000029274        | 10803222        | 0.81        | -15         | 0.0         | grey         |                                                                                  |
|              | ENSRNOT00000029150        | 10751919        | 0.74        | -13         | 0.0         | grey         |                                                                                  |
|              | ENSRNOT00000027484        | 10790462        | 0.76        | -11         | 0.0         | grey         |                                                                                  |
|              | <b>ENSRNOT00000022886</b> | <b>10731009</b> | <b>1.28</b> | <b>60</b>   | <b>10.1</b> | <b>brwn</b>  |                                                                                  |
|              | ENSRNOT00000022577        | 10719442        | 0.81        | -10         | 0.0         | grey         |                                                                                  |
|              | ENSRNOT00000010246        | 10861406        | 1.24        | 20          | 0.0         | grey         |                                                                                  |
|              | ENSRNOT00000009205        | 10890017        | 0.80        | -53         | 0.0         | grey         |                                                                                  |
|              | ENSRNOT00000007237        | 10877569        | 0.74        | -11         | 0.8         | pink         |                                                                                  |
|              | ENSRNOT00000005636        | 10904230        | 0.78        | -22         | 0.0         | grey         |                                                                                  |
|              | ENSRNOT00000001163        | 10828152        | 0.73        | -11         | 0.0         | grey         |                                                                                  |
|              | AY539927                  | 10868302        | 0.53        | -49         | 0.4         | coral        |                                                                                  |
|              | ---                       | 10700209        | 0.62        | -99         | 1.4         | ylw          |                                                                                  |
|              | ---                       | 10700650        | 0.70        | -20         | 0.6         | tan          |                                                                                  |
|              | ---                       | 10701059        | 0.65        | -15         | 0.0         | grey         |                                                                                  |
|              | ---                       | 10700525        | 0.66        | -1135       | 5.3         | turq         |                                                                                  |
|              | ---                       | <b>10700366</b> | <b>0.54</b> | <b>-655</b> | <b>1.5</b>  | <b>coral</b> |                                                                                  |
|              | ---                       | 10700398        | 0.59        | -460        | 6.6         | turq         |                                                                                  |
|              | ---                       | 10701336        | 0.72        | -401        | 4.4         | turq         |                                                                                  |
|              | ---                       | 10700124        | 0.72        | -258        | 8.3         | turq         |                                                                                  |
|              | ---                       | 10700714        | 0.60        | -229        | 6.2         | turq         |                                                                                  |
|              | ---                       | 10700852        | 0.69        | -217        | 0.0         | grey         |                                                                                  |
|              | ---                       | 10701035        | 0.61        | -140        | 4.2         | pink         |                                                                                  |
|              | ---                       | 10701509        | 0.60        | -136        | 2.9         | pink         |                                                                                  |
|              | ---                       | 10700208        | 0.63        | -106        | 2.5         | blue         |                                                                                  |
|              | ---                       | 10700400        | 0.69        | -97         | 0.0         | grey         |                                                                                  |
|              | ---                       | 10701121        | 0.71        | -84         | 0.0         | grey         |                                                                                  |
|              | ---                       | 10700989        | 0.74        | -63         | 0.8         | pink         |                                                                                  |
|              | ---                       | 10701373        | 0.52        | -58         | 0.0         | grey         |                                                                                  |
|              | ---                       | 10700235        | 0.59        | -49         | 0.0         | grey         |                                                                                  |

|     |                 |             |             |            |              |  |
|-----|-----------------|-------------|-------------|------------|--------------|--|
| --- | 10701345        | 0.70        | -43         | 0.0        | grey         |  |
| --- | 10701467        | 0.71        | -42         | 0.9        | green        |  |
| --- | 10700605        | 0.63        | -40         | 0.4        | coral        |  |
| --- | 10700662        | 0.63        | -38         | 0.0        | grey         |  |
| --- | 10701227        | 0.69        | -33         | 0.0        | grey         |  |
| --- | 10701273        | 0.50        | -33         | 0.0        | grey         |  |
| --- | 10700759        | 0.64        | -33         | 4.3        | blue         |  |
| --- | 10700389        | 0.52        | -31         | 0.0        | grey         |  |
| --- | 10700142        | 0.45        | -30         | 0.0        | grey         |  |
| --- | 10700332        | 0.54        | -29         | 0.8        | coral        |  |
| --- | 10701256        | 0.61        | -29         | 5.6        | blue         |  |
| --- | 10701234        | 0.65        | -21         | 0.0        | grey         |  |
| --- | 10701355        | 0.55        | -18         | 0.0        | grey         |  |
| --- | 10700767        | 0.58        | -16         | 0.0        | grey         |  |
| --- | 10701606        | 0.53        | -16         | 0.0        | grey         |  |
| --- | 10700227        | 0.80        | -15         | 0.0        | grey         |  |
| --- | 10701055        | 0.83        | -15         | 0.0        | grey         |  |
| --- | 10701180        | 0.75        | -14         | 0.0        | grey         |  |
| --- | 10701008        | 0.68        | -14         | 0.0        | grey         |  |
| --- | 10701203        | 0.46        | -14         | 0.8        | tan          |  |
| --- | 10700308        | 0.65        | -14         | 0.0        | grey         |  |
| --- | 10700159        | 0.82        | -14         | 0.0        | grey         |  |
| --- | 10701123        | 0.54        | -14         | 0.0        | grey         |  |
| --- | 10700377        | 0.65        | -13         | 0.0        | grey         |  |
| --- | 10700237        | 0.55        | -11         | 0.0        | grey         |  |
| --- | 10700488        | 0.64        | -11         | 0.0        | grey         |  |
| --- | 10701551        | 1.57        | 16          | 0.0        | grey         |  |
| --- | 10700174        | 1.55        | 17          | 1.8        | black        |  |
| --- | 10700981        | 1.42        | 18          | 0.0        | grey         |  |
| --- | 10701486        | 1.39        | 24          | 0.0        | grey         |  |
| --- | 10700441        | 1.80        | 28          | 2.1        | pink         |  |
| --- | 10700190        | 1.23        | 46          | 0.0        | grey         |  |
| --- | 10700861        | 1.24        | 51          | 1.3        | black        |  |
| --- | 10700448        | 1.21        | 58          | 0.0        | grey         |  |
| --- | 10700512        | 1.20        | 65          | 0.0        | grey         |  |
| --- | 10701361        | 1.34        | 78          | 1.0        | ylw          |  |
| --- | 10700854        | 1.32        | 95          | 0.0        | grey         |  |
| --- | 10700568        | 1.21        | 98          | 0.0        | grey         |  |
| --- | 10701272        | 1.69        | 117         | 0.0        | grey         |  |
| --- | 10701020        | 1.21        | 126         | 0.0        | grey         |  |
| --- | 10701261        | 1.30        | 144         | 0.0        | grey         |  |
| --- | 10700920        | 1.21        | 188         | 7.4        | brwn         |  |
| --- | 10701500        | 1.23        | 189         | 0.0        | grey         |  |
| --- | 10700716        | 1.29        | 347         | 0.0        | grey         |  |
| --- | 10700960        | 1.29        | 482         | 2.4        | ylw          |  |
| --- | 10714204        | 0.71        | -233        | 11.3       | turq         |  |
| --- | 10821067        | 0.76        | -160        | 1.8        | pink         |  |
| --- | <b>10813353</b> | <b>0.70</b> | <b>-140</b> | <b>4.6</b> | <b>black</b> |  |
| --- | 10710152        | 0.78        | -35         | 2.0        | black        |  |
| --- | 10722191        | 0.72        | -17         | 0.9        | coral        |  |
| --- | 10913940        | 0.74        | -17         | 0.0        | grey         |  |
| --- | 10725567        | 0.76        | -15         | 2.1        | black        |  |
| --- | 10930405        | 1.32        | 10          | 1.1        | coral        |  |
| --- | 10798220        | 1.39        | 12          | 1.6        | pink         |  |
| --- | 10778675        | 1.38        | 19          | 2.4        | green        |  |
| --- | 10937568        | 1.51        | 22          | 0.0        | grey         |  |
| --- | 10902292        | 1.22        | 36          | 4.5        | turq         |  |
| --- | 10811501        | 1.24        | 38          | 0.0        | grey         |  |
| --- | 10805722        | 1.27        | 51          | 0.0        | grey         |  |
| --- | 10769693        | 1.32        | 72          | 0.0        | grey         |  |

#### E. Uterus

| Gene Symbol      | RefSeq/GenBank/<br>Ensemble Number | Affymetrix<br>Probset ID | V/C  | Mean<br>Diff. | k.in | Mod    | Gene Title                        |
|------------------|------------------------------------|--------------------------|------|---------------|------|--------|-----------------------------------|
| <b>APOPTOSIS</b> |                                    |                          |      |               |      |        |                                   |
| Bag3             | NM_001011936                       | 10711401                 | 0.74 | -65           | 3.2  | salmon | Bcl2-associated athanogene 3      |
| Dapk1            | NM_001107335                       | 10797032                 | 0.71 | -44           | 0.0  | grey   | death associated protein kinase 1 |

|                                   |                            |                 |             |             |            |               |                                                                                                         |
|-----------------------------------|----------------------------|-----------------|-------------|-------------|------------|---------------|---------------------------------------------------------------------------------------------------------|
| Sharpin                           | NM_031153                  | 10904910        | 0.81        | -74         | 3.8        | red           | SHANK-associated RH domain interactor                                                                   |
| Tnfrsf1a                          | NM_013091                  | 10858967        | 0.75        | -79         | 0.0        | grey          | tumor necrosis factor receptor superfamily, member 1a                                                   |
| <b>CELL CYCLE</b>                 |                            |                 |             |             |            |               |                                                                                                         |
| Anapc1                            | NM_001107771               | 10849765        | 1.22        | 48          | 3.1        | brwn          | anaphase promoting complex subunit 1                                                                    |
| <b>Cep350</b>                     | <b>ENSRNOT00000005235</b>  | <b>10768874</b> | <b>1.21</b> | <b>31</b>   | <b>8.5</b> | <b>brwn</b>   | <b>centrosomal protein 350kDa</b>                                                                       |
| Mnd1                              | ENSRNOT000000031179        | 10824010        | 1.44        | 10          | 0.0        | grey          | meiotic nuclear divisions 1 homolog (S. cerevisiae)                                                     |
| Ptms                              | NM_031975                  | 10865607        | 0.81        | -101        | 3.0        | red           | parathymosin                                                                                            |
| <b>CYTOSKELETON-ECM</b>           |                            |                 |             |             |            |               |                                                                                                         |
| Cldn10                            | NM_001106058               | 10782020        | 1.51        | 28          | 4.5        | red           | claudin 10                                                                                              |
| Fblin1                            | NM_001007554               | 10881124        | 0.77        | -16         | 0.0        | grey          | filamin binding LIM protein 1                                                                           |
| Fbln1                             | NM_001127547               | 10898315        | 0.79        | -31         | 0.4        | gr60          | fibulin 1                                                                                               |
| Lamb2                             | NM_012974                  | 10793140        | 0.71        | -126        | 1.2        | salmo         | laminin, beta 2                                                                                         |
| LOC691984                         | ENSRNOT000000050826        | 10781999        | 1.47        | 21          | 0.0        | grey          | similar to Glypican-6 precursor                                                                         |
| Lrrc32                            | NM_001170434               | 10708896        | 0.69        | -11         | 4.2        | green         | leucine rich repeat containing 32                                                                       |
| Map1b                             | NM_019217                  | 10820835        | 0.83        | -15         | 0.0        | grey          | microtubule-associated protein 1B                                                                       |
| <b>Mast4</b>                      | <b>ENSRNOT000000061032</b> | <b>10821072</b> | <b>0.81</b> | <b>-20</b>  | <b>3.3</b> | <b>salmo</b>  | <b>microtubule associated serine/threonine kinase family member 4</b>                                   |
| Smchd1                            | ENSRNOT000000019359        | 10930435        | 1.24        | 67          | 7.2        | brwn          | structural maintenance of chromosomes flexible hinge domain containing 1                                |
| Tspan12                           | NM_001015026               | 10861213        | 1.48        | 409         | 3.1        | salmo         | tetraspanin 12                                                                                          |
| Zyx                               | NM_053761                  | 10855062        | 0.66        | -52         | 3.7        | red           | zyxin                                                                                                   |
| <b>DEVELOPMENT</b>                |                            |                 |             |             |            |               |                                                                                                         |
| Egln2                             | NM_001004083               | 10719958        | 0.81        | -42         | 1.3        | salmo         | EGL nine homolog 2 (C. elegans)                                                                         |
| Fhl3                              | NM_001107979               | 10871806        | 0.67        | -26         | 0.0        | grey          | four and a half LIM domains 3                                                                           |
| Gjb2                              | NM_001004099               | 10784117        | 0.55        | -55         | 0.0        | grey          | gap junction protein, beta 2                                                                            |
| Ihh                               | NM_053384                  | 10929027        | 1.54        | 26          | 0.0        | grey          | Indian hedgehog                                                                                         |
| LOC301748                         | ENSRNOT000000048256        | 10861620        | 1.92        | 31          | 3.7        | purple        | similar to RIKEN cDNA 1700001E04                                                                        |
| <b>LOC501091</b>                  | <b>ENSRNOT000000046852</b> | <b>10921318</b> | <b>1.79</b> | <b>30</b>   | <b>4.6</b> | <b>purple</b> | <b>similar to Discs large homolog 5 (Placenta and prostate DLG) (Discs large protein P-dlg) (chr9)</b>  |
| <b>LOC501091</b>                  | <b>ENSRNOT000000046852</b> | <b>10772815</b> | <b>1.87</b> | <b>27</b>   | <b>3.7</b> | <b>purple</b> | <b>similar to Discs large homolog 5 (Placenta and prostate DLG) (Discs large protein P-dlg) (chr14)</b> |
| Lrpprc                            | NM_001008519               | 10888210        | 1.25        | 153         | 3.6        | brwn          | leucine-rich PPR-motif containing                                                                       |
| Nde1                              | NM_053347                  | 10740309        | 1.23        | 30          | 0.0        | grey          | nudE nuclear distribution gene E homolog 1 (A. nidulans)                                                |
| Neu1                              | NM_031522                  | 10831300        | 0.75        | -56         | 3.7        | red           | sialidase 1 (lysosomal sialidase)                                                                       |
| Neur12                            | NM_001107802               | 10851667        | 0.81        | -12         | 3.6        | red           | neuritized homolog 2 (Drosophila)                                                                       |
| Osgin2                            | ENSRNOT000000012394        | 10875642        | 1.24        | 25          | 0.0        | grey          | oxidative stress induced growth inhibitor family member 2                                               |
| Popdc2                            | NM_199113                  | 10754179        | 0.59        | -64         | 1.4        | m-blu         | popeye domain containing 2                                                                              |
| Porcn                             | NM_001173355               | 10932394        | 0.65        | -20         | 4.3        | brwn          | porcupine homolog (Drosophila)                                                                          |
| Pzp                               | NM_145779                  | 10865868        | 1.23        | 28          | 0.0        | grey          | pregnancy-zone protein                                                                                  |
| RGD1306820                        | NM_001107557               | 10711743        | 1.32        | 26          | 2.0        | purple        | similar to erythroid differentiation-related factor 1                                                   |
| Rsrc2                             | NM_001014128               | 10758354        | 1.21        | 50          | 3.0        | brwn          | arginine/serine-rich coiled-coil 2                                                                      |
| Setx                              | ENSRNOT000000017984        | 10834908        | 1.39        | 140         | 6.7        | turq          | senataxin                                                                                               |
| Sfrp4                             | NM_053544                  | 10798610        | 0.55        | -31         | 0.0        | grey          | secreted frizzled-related protein 4                                                                     |
| Skil                              | ENSRNOT000000013191        | 10822637        | 1.27        | 52          | 3.7        | brwn          | SKI-like oncogene                                                                                       |
| Sox6                              | NM_001024751               | 10725060        | 1.26        | 13          | 0.0        | grey          | SRY (sex determining region Y)-box 6                                                                    |
| Synj2                             | NM_001113371               | 10702829        | 0.69        | -22         | 0.0        | grey          | synaptojanin 2                                                                                          |
| Urg4                              | NM_001077660               | 10778214        | 0.83        | -32         | 2.4        | salmo         | up-regulated gene 4                                                                                     |
| <b>DNA REPAIR</b>                 |                            |                 |             |             |            |               |                                                                                                         |
| Cry2                              | NM_133405                  | 10847525        | 0.78        | -56         | 2.6        | salmo         | cryptochrome 2 (photolyase-like)                                                                        |
| <b>ELECTRON TRANSPORT</b>         |                            |                 |             |             |            |               |                                                                                                         |
| Cyp2d4                            | NM_138515                  | 10905721        | 0.77        | -15         | 2.5        | salmo         | cytochrome P450, family 2, subfamily d, polypeptide 4                                                   |
| Cyp2d5                            | NM_173304                  | 10905732        | 1.23        | 11          | 0.0        | grey          | cytochrome P450, family 2, subfamily d, polypeptide 5                                                   |
| <b>EPIGENETICS</b>                |                            |                 |             |             |            |               |                                                                                                         |
| Mtrr                              | NM_001039003               | 10793369        | 1.20        | 50          | 6.8        | turq          | 5-methyltetrahydrofolate-homocysteine methyltransferase reductase                                       |
| <b>GROWTH FACTORS</b>             |                            |                 |             |             |            |               |                                                                                                         |
| Angpt1                            | NM_053546                  | 10903529        | 1.40        | 58          | 2.3        | red           | angiopoietin 1                                                                                          |
| Gdf10                             | NM_024375                  | 10786905        | 1.75        | 11          | 1.5        | salmo         | growth differentiation factor 10                                                                        |
| Tgfb1i1                           | NM_001191840               | 10711364        | 0.71        | -16         | 0.0        | grey          | transforming growth factor beta 1 induced transcript 1                                                  |
| <b>IMMUNE RESPONSE</b>            |                            |                 |             |             |            |               |                                                                                                         |
| Bat2d1                            | ENSRNOT000000030419        | 10869661        | 1.22        | 68          | 0.0        | grey          | BAT2 domain containing 1                                                                                |
| C1qb                              | NM_019262                  | 10880727        | 0.76        | -40         | 0.0        | grey          | complement component 1, q subcomponent, B chain                                                         |
| Cd8a                              | NM_031538                  | 10856274        | 3.04        | 32          | 0.0        | grey          | CD8a molecule                                                                                           |
| Ifitm3                            | NM_001136124               | 10726682        | 0.80        | -336        | 0.0        | grey          | interferon induced transmembrane protein 3                                                              |
| Lingo4                            | NM_001109189               | 10817222        | 0.71        | -37         | 2.0        | brwn          | leucine rich repeat and Ig domain containing 4                                                          |
| Lyar                              | NM_001011911               | 10777328        | 1.47        | 41          | 0.0        | grey          | Ly1 antibody reactive homolog (mouse)                                                                   |
| Toag1                             | NM_001110838               | 10914442        | 1.30        | 73          | 4.9        | brwn          | tolerance-associated gene 1                                                                             |
| <b>METABOLISM &amp; TRANSPORT</b> |                            |                 |             |             |            |               |                                                                                                         |
| Acs13                             | NM_057107                  | 10924672        | 1.32        | 95          | 1.4        | gr60          | acyl-CoA synthetase long-chain family member 3                                                          |
| Adi1                              | NM_199097                  | 10883982        | 1.21        | 76          | 1.8        | purple        | acireductone dioxygenase 1                                                                              |
| <b>Atp6v0c</b>                    | <b>NM_130823</b>           | <b>10740996</b> | <b>0.73</b> | <b>-459</b> | <b>6.9</b> | <b>red</b>    | <b>ATPase, H+ transporting, lysosomal 16kDa, V0 subunit c</b>                                           |
| Atp6v1a                           | ENSRNOT000000035482        | 10823611        | 1.33        | 12          | 0.4        | brwn          | ATPase, H+ transporting, lysosomal V1 subunit A                                                         |



|                                         |                     |                 |             |             |             |              |                                                                                       |
|-----------------------------------------|---------------------|-----------------|-------------|-------------|-------------|--------------|---------------------------------------------------------------------------------------|
| Cacna1c                                 | NM_012517           | 10865016        | 0.65        | -20         | 0.0         | grey         | calcium channel, voltage-dependent, L type, alpha 1C subunit                          |
| Cdo1                                    | NM_052809           | 10804396        | 4.34        | 992         | 1.8         | red          | cysteine dioxygenase, type I                                                          |
| <b>Cdbl</b>                             | <b>NM_001008770</b> | <b>10814105</b> | <b>1.67</b> | <b>456</b>  | <b>2.2</b>  | <b>gr60</b>  | <b>carboxymethylenebutenolidase homolog (Pseudomonas)</b>                             |
| Cris1                                   | NM_001014258        | 10840131        | 1.21        | 132         | 1.2         | purple       | cardiolipin synthase 1                                                                |
| Elov6                                   | NM_134383           | 10819005        | 2.34        | 86          | 3.1         | green        | ELOVL family member 6, elongation of long chain fatty acids (yeast)                   |
| Gstm1                                   | NM_017014           | 10825925        | 2.52        | 921         | 0.9         | green        | glutathione S-transferase mu 1                                                        |
| Hba-a2                                  | NM_013096           | 10741756        | 1.67        | 3985        | 4.5         | m-blu        | hemoglobin alpha, adult chain 2                                                       |
| Hbb                                     | NM_033234           | 10724315        | 2.04        | 1551        | 4.7         | m-blu        | hemoglobin, beta                                                                      |
| Hbb-b1                                  | NM_198776           | 10724319        | 2.20        | 1599        | 4.5         | m-blu        | hemoglobin, beta adult major chain                                                    |
| Hsd17b12                                | NM_032066           | 10847646        | 1.21        | 95          | 0.0         | grey         | hydroxysteroid (17-beta) dehydrogenase 12                                             |
| Ivd                                     | NM_012592           | 10838704        | 1.55        | 357         | 1.7         | green        | isovaleryl coenzyme A dehydrogenase                                                   |
| Kynu                                    | NM_053902           | 10836019        | 1.37        | 26          | 0.0         | grey         | kynureninase (L-kynurenine hydrolase)                                                 |
| <b>LOC689064</b>                        | <b>NM_001111269</b> | <b>10724311</b> | <b>2.04</b> | <b>1671</b> | <b>4.9</b>  | <b>m-blu</b> | <b>beta-globin</b>                                                                    |
| Mdh1                                    | NM_033235           | 10778661        | 1.23        | 571         | 4.8         | brwn         | malate dehydrogenase 1, NAD (soluble)                                                 |
| Ndufs1                                  | NM_001005550        | 10928486        | 1.24        | 409         | 7.7         | brwn         | NADH dehydrogenase (ubiquinone) Fe-S protein 1                                        |
| Nup205                                  | NM_001108620        | 10854494        | 1.41        | 34          | 0.0         | grey         | nucleoporin 205                                                                       |
| Nup93                                   | NM_001011925        | 10809370        | 1.21        | 22          | 0.0         | grey         | nucleoporin 93                                                                        |
| Pank3                                   | NM_001108272        | 10732789        | 1.25        | 127         | 4.4         | brwn         | pantothenate kinase 3                                                                 |
| Pcca                                    | NM_019330           | 10782166        | 1.24        | 134         | 3.8         | brwn         | propionyl-coenzyme A carboxylase, alpha polypeptide                                   |
| Phgdh                                   | NM_031620           | 10825328        | 1.26        | 15          | 0.0         | grey         | phosphoglycerate dehydrogenase                                                        |
| Pnpt1                                   | NM_001142371        | 10774652        | 1.21        | 73          | 5.0         | brwn         | polyribonucleotide nucleotidyltransferase 1                                           |
| Prr12                                   | ENSRNOT00000038067  | 10721616        | 0.76        | -12         | 1.3         | brwn         | proline rich 12                                                                       |
| Ptgis                                   | NM_031557           | 10851947        | 0.68        | -24         | 0.0         | grey         | prostaglandin I2 (prostacyclin) synthase                                              |
| RGD1564228                              | ENSRNOT00000052157  | 10738261        | 0.73        | -29         | 1.6         | red          | similar to Naglu                                                                      |
| Scamp4                                  | NM_031725           | 10900478        | 0.80        | -48         | 3.7         | red          | secretory carrier membrane protein 4                                                  |
| Slc15a1                                 | NM_057121           | 10785943        | 1.77        | 19          | 0.0         | grey         | solute carrier family 15 (oligopeptide transporter), member 1                         |
| Slc16a2                                 | NM_147216           | 10938830        | 0.81        | -49         | 2.3         | red          | solute carrier family 16, member 2 (monocarboxylic acid transporter 8)                |
| Slc27a1                                 | NM_053580           | 10787313        | 0.81        | -44         | 1.2         | salmon       | solute carrier family 27 (fatty acid transporter), member 1                           |
| Slc44a2                                 | NM_001134715        | 10908369        | 0.81        | -57         | 3.1         | salmon       | solute carrier family 44, member 2                                                    |
| St3gal4                                 | NM_203337           | 10916016        | 0.73        | -61         | 0.0         | grey         | ST3 beta-galactoside alpha-2,3-sialyltransferase 4                                    |
| Timm17a                                 | NM_019351           | 10890170        | 1.23        | 83          | 0.0         | grey         | translocase of inner mitochondrial membrane 17 homolog A (yeast)                      |
| Xpo4                                    | NM_001106042        | 10784140        | 1.28        | 46          | 6.0         | brwn         | exportin 4                                                                            |
| <b>PROTEOLYSIS</b>                      |                     |                 |             |             |             |              |                                                                                       |
| Lonrf2                                  | ENSRNOT00000033964  | 10927588        | 1.50        | 10          | 1.0         | purple       | LON peptidase N-terminal domain and ring finger 2                                     |
| <b>Mgrn1</b>                            | <b>NM_001013964</b> | <b>10740649</b> | <b>0.77</b> | <b>-78</b>  | <b>8.8</b>  | <b>red</b>   | <b>mahogunin, ring finger 1</b>                                                       |
| Mmp16                                   | NM_080776           | 10867761        | 1.36        | 11          | 0.0         | grey         | matrix metalloproteinase 16                                                           |
| Prss12                                  | NM_053504           | 10818880        | 1.32        | 11          | 0.0         | grey         | protease, serine, 12 neurotrypsin (motopsin)                                          |
| Rnf144b                                 | NM_001108881        | 10797728        | 0.71        | -60         | 0.0         | grey         | ring finger protein 144B                                                              |
| Serpine1                                | NM_012620           | 10761047        | 0.69        | -16         | 0.0         | grey         | serine (or cysteine) peptidase inhibitor, clade E, member 1                           |
| Spsb1                                   | NM_001107994        | 10881820        | 0.71        | -25         | 2.2         | brwn         | splA/ryanodine receptor domain and SOCS box containing 1                              |
| Ubc                                     | NM_017314           | 10758134        | 0.73        | -282        | 0.0         | grey         | ubiquitin C                                                                           |
| Usp30                                   | NM_001107153        | 10762857        | 0.77        | -15         | 4.0         | red          | ubiquitin specific peptidase 30                                                       |
| Usp46                                   | NM_001191596        | 10772306        | 1.26        | 51          | 0.6         | gr60         | ubiquitin specific peptidase 46                                                       |
| <b>RECEPTORS &amp; BINDING PROTEINS</b> |                     |                 |             |             |             |              |                                                                                       |
| LOC100363145                            | ENSRNOT00000025394  | 10790023        | 0.72        | -22         | 1.4         | red          | stabilin 1                                                                            |
| Ltbp3                                   | NM_001191561        | 10713123        | 0.83        | -19         | 1.0         | red          | latent transforming growth factor beta binding protein 3                              |
| Ltbp4                                   | NM_001170336        | 10720000        | 0.66        | -107        | 1.9         | gr60         | latent transforming growth factor beta binding protein 4                              |
| Mnt                                     | NM_001105807        | 10735818        | 0.70        | -12         | 0.0         | grey         | max binding protein                                                                   |
| Mrc1                                    | NM_001106123        | 10796476        | 0.82        | -50         | 0.0         | grey         | mannose receptor, C type 1                                                            |
| Stambp                                  | NM_138531           | 10863559        | 0.74        | -48         | 2.1         | red          | Stam binding protein                                                                  |
| Tfrc                                    | NM_022712           | 10754785        | 1.89        | 236         | 0.0         | grey         | transferrin receptor                                                                  |
| <b>Tgfr3</b>                            | <b>NM_017256</b>    | <b>10771070</b> | <b>0.62</b> | <b>-179</b> | <b>2.5</b>  | <b>gr60</b>  | <b>transforming growth factor, beta receptor III</b>                                  |
| Thra                                    | NM_031134           | 10738056        | 0.77        | -21         | 1.0         | gr60         | thyroid hormone receptor alpha                                                        |
| Vom1r1                                  | ENSRNOT00000060021  | 10718152        | 1.23        | 14          | 0.8         | gr60         | vomeroneasal 1 receptor, 1                                                            |
| <b>SIGNALING</b>                        |                     |                 |             |             |             |              |                                                                                       |
| Agfg2                                   | NM_001107131        | 10760994        | 0.74        | -28         | 1.8         | gr60         | ArfGAP with FG repeats 2                                                              |
| Akap2                                   | NM_001011974        | 10869204        | 0.80        | -31         | 1.0         | l-cn         | A kinase (PKA) anchor protein 2                                                       |
| Cyr61                                   | NM_031327           | 10827231        | 0.64        | -61         | 0.0         | grey         | cysteine-rich, angiogenic inducer, 61                                                 |
| Dbi                                     | NM_031853           | 10931154        | 1.43        | 199         | 0.0         | grey         | diazepam binding inhibitor (GABA receptor modulator, acyl-Coenzyme A binding protein) |
| Errfi1                                  | NM_001014071        | 10874193        | 0.82        | -204        | 1.7         | red          | ERBB receptor feedback inhibitor 1                                                    |
| Gpr107                                  | NM_001107828        | 10835303        | 0.83        | -77         | 0.0         | grey         | G protein-coupled receptor 107                                                        |
| Gpr88                                   | NM_031696           | 10826261        | 0.31        | -32         | 0.8         | l-yel        | G-protein coupled receptor 88                                                         |
| <b>Hspa4</b>                            | <b>NM_153629</b>    | <b>10742575</b> | <b>1.23</b> | <b>307</b>  | <b>10.0</b> | <b>brwn</b>  | <b>heat shock protein 4</b>                                                           |
| Hspa4l                                  | NM_001106428        | 10815099        | 1.53        | 63          | 3.0         | brwn         | heat shock protein 4 like                                                             |
| Hspa9                                   | NM_001100658        | 10803851        | 1.20        | 506         | 3.5         | brwn         | heat shock protein 9                                                                  |
| Hspb11                                  | NM_001131002        | 10870661        | 1.28        | 18          | 2.6         | red          | heat shock protein family B (small), member 11                                        |
| Hspd1                                   | NM_022229           | 10928154        | 1.36        | 726         | 0.0         | grey         | heat shock protein 1 (chaperonin)                                                     |
| Mapk1ip1l                               | NM_001108373        | 10779671        | 0.80        | -75         | 1.6         | salmon       | mitogen-activated protein kinase 1 interacting protein 1-like                         |

|                                               |                     |                 |             |             |            |              |                                                                                                       |
|-----------------------------------------------|---------------------|-----------------|-------------|-------------|------------|--------------|-------------------------------------------------------------------------------------------------------|
| <b>Mbrl</b>                                   | <b>NM_001100886</b> | <b>10893961</b> | <b>0.80</b> | <b>-100</b> | <b>7.6</b> | <b>red</b>   | <b>membralin</b>                                                                                      |
| Mknk1                                         | NM_001044267        | 10871133        | 0.78        | -60         | 0.0        | grey         | MAP kinase-interacting serine/threonine kinase 1                                                      |
| Mst4                                          | NM_001191736        | 10935418        | 1.36        | 15          | 0.0        | grey         | serine/threonine protein kinase MST4                                                                  |
| Nmur2                                         | NM_022275           | 10742835        | 0.53        | -18         | 0.8        | purple       | neuromedin U receptor 2                                                                               |
| Pde3a                                         | NM_017337           | 10859494        | 0.75        | -36         | 0.9        | black        | phosphodiesterase 3A, cGMP inhibited                                                                  |
| Pdk3                                          | NM_001106581        | 10938384        | 1.24        | 29          | 1.3        | brwn         | pyruvate dehydrogenase kinase, isozyme 3                                                              |
| Peli2                                         | NM_001107259        | 10779726        | 0.68        | -47         | 3.4        | red          | pellino 2                                                                                             |
| Phlda1                                        | NM_017180           | 10895406        | 1.26        | 29          | 0.0        | grey         | pleckstrin homology-like domain, family A, member 1                                                   |
| Pign                                          | NM_001100584        | 10766926        | 1.25        | 72          | 6.6        | brwn         | phosphatidylinositol glycan, class N                                                                  |
| Plekhm2                                       | NM_001191767        | 10881146        | 0.80        | -28         | 2.1        | salmo        | pleckstrin homology domain containing, family M (with RUN domain) member 2                            |
| Plekho1                                       | NM_001025119        | 10825113        | 0.70        | -97         | 2.9        | red          | pleckstrin homology domain containing, family O member 1                                              |
| Prkaa2                                        | NM_023991           | 10878416        | 0.78        | -107        | 0.0        | grey         | protein kinase, AMP-activated, alpha 2 catalytic subunit                                              |
| Prkar2b                                       | NM_001030020        | 10889590        | 1.61        | 45          | 0.0        | grey         | protein kinase, cAMP dependent regulatory, type II beta                                               |
| Ptpn4                                         | NM_001100479        | 10767132        | 1.23        | 63          | 11.3       | turq         | protein tyrosine phosphatase, non-receptor type 4                                                     |
| Ptprv                                         | NM_033099           | 10764192        | 0.74        | -10         | 0.0        | grey         | protein tyrosine phosphatase, receptor type, V                                                        |
| RGD1564641                                    | ENSRNOT00000002443  | 10754592        | 1.28        | 44          | 0.0        | grey         | similar to Neurogenic locus notch homolog protein 2 precursor (Notch 2) (hN2)                         |
| Ripk4                                         | NM_001107103        | 10753461        | 1.27        | 11          | 0.0        | grey         | receptor-interacting serine-threonine kinase 4                                                        |
| Seli                                          | NM_001134754        | 10889064        | 1.77        | 387         | 4.2        | brwn         | selenoprotein I                                                                                       |
| Tbc1d7                                        | NM_001108411        | 10794576        | 0.80        | -22         | 0.0        | grey         | TBC1 domain family, member 7                                                                          |
| <b>Tns1</b>                                   | <b>NM_001191810</b> | <b>10928855</b> | <b>0.66</b> | <b>-303</b> | <b>3.4</b> | <b>salmo</b> | <b>tensin 1</b>                                                                                       |
| <b>Tom1</b>                                   | <b>NM_001008365</b> | <b>10806106</b> | <b>0.78</b> | <b>-60</b>  | <b>6.6</b> | <b>red</b>   | <b>target of myb1 homolog (chicken)</b>                                                               |
| <b>TRANSCRIPTION</b>                          |                     |                 |             |             |            |              |                                                                                                       |
| Ankrd26                                       | ENSRNOT00000056301  | 10864979        | 1.29        | 15          | 1.0        | purple       | ankyrin repeat domain 26                                                                              |
| Bcl6                                          | NM_001107084        | 10751931        | 0.74        | -11         | 0.4        | m-blu        | B-cell CLL/lymphoma 6                                                                                 |
| <b>Btaf1</b>                                  | <b>NM_001191917</b> | <b>10715025</b> | <b>1.24</b> | <b>64</b>   | <b>9.6</b> | <b>brwn</b>  | <b>BTA1 RNA polymerase II, B-TFIID transcription factor-associated, (Mot1 homolog, S. cerevisiae)</b> |
| Btg1                                          | NM_017258           | 10895069        | 0.76        | -234        | 0.0        | grey         | B-cell translocation gene 1, anti-proliferative                                                       |
| Ccdc124                                       | NM_001106071        | 10787420        | 1.27        | 16          | 3.3        | green        | coiled-coil domain containing 124                                                                     |
| Ccdc85b                                       | ENSRNOT00000027896  | 10727854        | 0.81        | -12         | 0.0        | grey         | coiled-coil domain containing 85B                                                                     |
| Cirbp                                         | NM_031147           | 10900583        | 0.68        | -98         | 0.6        | gr60         | cold inducible RNA binding protein                                                                    |
| Ddx18                                         | NM_001006996        | 10767189        | 1.20        | 48          | 4.4        | brwn         | DEAD (Asp-Glu-Ala-Asp) box polypeptide 18                                                             |
| Dnajc30                                       | NM_001109024        | 10761225        | 0.76        | -19         | 2.6        | red          | DnaJ (Hsp40) homolog, subfamily C, member 30                                                          |
| Fat4                                          | NM_001191705        | 10815057        | 1.27        | 13          | 0.0        | grey         | FAT tumor suppressor homolog 4 (Drosophila)                                                           |
| Fbxl6                                         | NM_001005563        | 10904976        | 0.76        | -26         | 1.2        | salmo        | F-box and leucine-rich repeat protein 6                                                               |
| Fyn                                           | NM_012755           | 10830382        | 0.81        | -39         | 0.0        | grey         | FYN oncogene related to SRC, FGR, YES                                                                 |
| Ino80b                                        | NM_001048233        | 10863496        | 0.81        | -11         | 0.0        | grey         | INO80 complex subunit B                                                                               |
| Ino80e                                        | NM_001013900        | 10725846        | 0.73        | -50         | 5.2        | red          | INO80 complex subunit E                                                                               |
| Kbtbd8                                        | NM_001109250        | 10857423        | 1.37        | 12          | 1.7        | green        | kelch repeat and BTB (POZ) domain containing 8                                                        |
| Klf7                                          | NM_001108800        | 10928524        | 0.79        | -23         | 0.0        | grey         | Kruppel-like factor 7 (ubiquitous)                                                                    |
| Klhdc3                                        | NM_001012203        | 10926441        | 0.80        | -111        | 3.5        | red          | kelch domain containing 3                                                                             |
| Klhl11                                        | NM_001105838        | 10747368        | 1.21        | 52          | 2.0        | purple       | kelch-like 11 (Drosophila)                                                                            |
| Klhl29                                        | NM_001106713        | 10889156        | 0.75        | -12         | 1.8        | purple       | kelch-like 29 (Drosophila)                                                                            |
| Mrv1                                          | NM_001105211        | 10724902        | 0.72        | -31         | 1.2        | gr60         | murine retrovirus integration site 1 homolog                                                          |
| Nasp                                          | NM_001005543        | 10878880        | 1.21        | 19          | 3.6        | brwn         | nuclear autoantigenic sperm protein (histone-binding)                                                 |
| Ndrp1                                         | NM_001011991        | 10904169        | 0.74        | -88         | 0.0        | grey         | N-myc downstream regulated gene 1                                                                     |
| Nfix                                          | NM_030866           | 10806665        | 0.79        | -103        | 2.1        | gr60         | nuclear factor I/X (CCAAT-binding transcription factor)                                               |
| <b>Noc3l</b>                                  | <b>NM_001108523</b> | <b>10729999</b> | <b>1.31</b> | <b>38</b>   | <b>8.6</b> | <b>brwn</b>  | <b>nucleolar complex associated 3 homolog (S. cerevisiae)</b>                                         |
| Npas2                                         | NM_001108214        | 10922745        | 0.76        | -17         | 0.0        | grey         | neuronal PAS domain protein 2                                                                         |
| Nudt5                                         | NM_001007733        | 10799539        | 1.25        | 42          | 0.0        | grey         | nudix (nucleoside diphosphate linked moiety X)-type motif 5                                           |
| Pcif1                                         | NM_001108605        | 10842221        | 0.72        | -45         | 0.0        | grey         | PDX1 C-terminal inhibiting factor 1                                                                   |
| Polr3b                                        | NM_001191878        | 10901328        | 1.24        | 32          | 0.8        | l-yel        | polymerase (RNA) III (DNA directed) polypeptide B                                                     |
| <b>Rela</b>                                   | <b>NM_199267</b>    | <b>10713089</b> | <b>0.71</b> | <b>-87</b>  | <b>7.4</b> | <b>red</b>   | <b>v-rel reticuloendotheliosis viral oncogene homolog A (avian)</b>                                   |
| Serf1                                         | ENSRNOT00000024291  | 10812734        | 1.53        | 50          | 1.2        | gr60         | small EDRK-rich factor 1                                                                              |
| Src                                           | NM_031977           | 10841624        | 0.77        | -16         | 3.6        | red          | v-src sarcoma (Schmidt-Ruppin A-2) viral oncogene homolog (avian)                                     |
| Tcfe3                                         | ENSRNOT00000012829  | 10937048        | 0.76        | -35         | 4.7        | red          | transcription factor E3                                                                               |
| Thoc4                                         | NM_001109602        | 10749681        | 1.36        | 108         | 1.6        | brwn         | THO complex 4                                                                                         |
| Trip4                                         | NM_001134981        | 10918302        | 1.21        | 51          | 8.8        | turq         | thyroid hormone receptor interactor 4                                                                 |
| Tshz1                                         | ENSRNOT00000021750  | 10805511        | 0.82        | -35         | 3.3        | salmo        | teashirt zinc finger homeobox 1                                                                       |
| Zbtb11                                        | NM_001107097        | 10753720        | 1.33        | 51          | 1.2        | purple       | zinc finger and BTB domain containing 11                                                              |
| Zbtb22                                        | NM_001009172        | 10831790        | 0.80        | -18         | 3.1        | red          | zinc finger and BTB domain containing 22                                                              |
| Zbtb4                                         | ENSRNOT00000019687  | 10735015        | 0.80        | -29         | 0.5        | gr60         | zinc finger and BTB domain containing 4                                                               |
| Zfp148                                        | NM_031615           | 10754629        | 1.22        | 37          | 5.0        | brwn         | zinc finger protein 148                                                                               |
| Zfp395                                        | NM_001107271        | 10781100        | 0.76        | -22         | 0.0        | grey         | zinc finger protein 395                                                                               |
| Znf580                                        | ENSRNOT00000021772  | 10718825        | 0.76        | -13         | 0.0        | grey         | zinc finger protein 580                                                                               |
| Znf688                                        | ENSRNOT00000024858  | 10726018        | 0.75        | -27         | 1.1        | red          | zinc finger protein 688                                                                               |
| Zswim4                                        | NM_001107163        | 10806709        | 0.75        | -11         | 0.0        | grey         | zinc finger, SWIM-type containing 4                                                                   |
| <b>TRANSLATION &amp; PROTEIN MODIFICATION</b> |                     |                 |             |             |            |              |                                                                                                       |
| Cct8                                          | NM_001105897        | 10752903        | 1.22        | 313         | 3.8        | brwn         | chaperonin containing Tcp1, subunit 8 (theta)                                                         |
| Eil1                                          | NM_001107304        | 10790978        | 0.75        | -30         | 4.9        | red          | elongation factor RNA polymerase II                                                                   |

|                                    |                           |                 |             |           |             |              |                                                                     |
|------------------------------------|---------------------------|-----------------|-------------|-----------|-------------|--------------|---------------------------------------------------------------------|
| Hnrnpa3                            | NM_001111295              | 10883583        | 1.21        | 378       | 0.0         | grey         | heterogeneous nuclear ribonucleoprotein A3                          |
| Ints2                              | BC128757                  | 10745871        | 1.27        | 19        | 2.8         | brwn         | integrator complex subunit 2                                        |
| <b>Lars</b>                        | <b>NM_001009637</b>       | <b>10804187</b> | <b>1.24</b> | <b>82</b> | <b>8.7</b>  | <b>brwn</b>  | <b>leucyl-tRNA synthetase</b>                                       |
| Polr1b                             | NM_031773                 | 10839751        | 1.23        | 21        | 0.0         | grey         | polymerase (RNA) I polypeptide B                                    |
| Qrs1                               | NM_001014034              | 10833837        | 1.25        | 21        | 1.7         | green        | glutamyl-tRNA synthase (glutamine-hydrolyzing)-like 1               |
| Rbm8a                              | ENSRNOT00000028807        | 10817573        | 1.25        | 55        | 0.0         | grey         | RNA binding motif protein 8A                                        |
| RGD1561067                         | ENSRNOT00000046138        | 10788569        | 0.68        | -161      | 1.4         | salmo        | similar to RNA binding protein gene with multiple splicing          |
| Rnasek                             | NM_001137561              | 10744391        | 0.78        | -655      | 6.5         | red          | ribonuclease, RNase K                                               |
| Sf3a3                              | NM_001025698              | 10871813        | 1.25        | 42        | 0.0         | grey         | splicing factor 3a, subunit 3                                       |
| Sf3b4                              | NM_001011951              | 10817504        | 0.80        | -19       | 4.8         | red          | splicing factor 3b, subunit 4                                       |
| Sh3bp2                             | NM_001100684              | 10777677        | 0.75        | -13       | 3.3         | red          | SH3-domain binding protein 2                                        |
| Snapc2                             | NM_001013121              | 10759531        | 0.69        | -51       | 3.3         | red          | small nuclear RNA activating complex, polypeptide 2                 |
| <b>MISCELLANEOUS &amp; UNKNOWN</b> |                           |                 |             |           |             |              |                                                                     |
| Carkd                              | ENSRNOT00000065043        | 10789574        | 1.23        | 18        | 0.0         | grey         | carbohydrate kinase domain containing                               |
| Dd25                               | NM_199403                 | 10769236        | 1.60        | 194       | 1.8         | purple       | hypothetical protein Dd25                                           |
| Fam100a                            | BC079459                  | 10731734        | 0.70        | -40       | 5.3         | red          | family with sequence similarity 100, member A                       |
| Fam189b                            | ENSRNOT00000027828        | 10816712        | 0.69        | -15       | 0.9         | gr60         | family with sequence similarity 189, member B                       |
| Fam43a                             | NM_001039002              | 10754939        | 0.80        | -23       | 0.0         | grey         | family with sequence similarity 43, member A                        |
| Lin37                              | NM_001106245              | 10720648        | 0.81        | -39       | 2.2         | salmo        | lin-37 homolog (C. elegans)                                         |
| LOC100361389                       | ENSRNOT00000028563        | 10747847        | 0.73        | -10       | 3.8         | brwn         | hypothetical protein LOC100361389                                   |
| LOC689574                          | NM_001195503              | 10854540        | 0.75        | -273      | 5.1         | red          | hypothetical protein LOC689574                                      |
| LOC689826                          | ENSRNOT00000047742        | 10880607        | 0.77        | -11       | 2.8         | green        | hypothetical protein LOC689826                                      |
| Nacc2                              | NM_001100533              | 10843647        | 0.81        | -24       | 2.5         | salmo        | nucleus accumbens associated 2, BEN and BTB (POZ) domain containing |
| Nkd1                               | BC168970                  | 10809678        | 0.78        | -11       | 1.8         | gr60         | naked cuticle homolog 1 (Drosophila)                                |
| Pqlc1                              | NM_001013189              | 10802956        | 0.78        | -44       | 2.5         | red          | PQ loop repeat containing 1                                         |
| RGD1311849                         | ENSRNOT00000058387        | 10869839        | 1.43        | 32        | 0.8         | green        | similar to mKIAA1797 protein                                        |
| RGD1559954                         | XM_002724794              | 10757249        | 1.37        | 22        | 0.0         | grey         | similar to family with sequence similarity 55, member C             |
| RGD1564615                         | ENSRNOT00000018425        | 10855765        | 1.46        | 59        | 4.4         | red          | similar to mKIAA0241 protein                                        |
| Tmem50b                            | NM_001025014              | 10753135        | 1.26        | 136       | 0.0         | grey         | transmembrane protein 50B                                           |
| <b>EST's</b>                       |                           |                 |             |           |             |              |                                                                     |
| LOC100361915                       | ENSRNOT00000028495        | 10728136        | 0.83        | -31       | 2.8         | salmo        | chromosome 11 open reading frame 2-like                             |
| LOC501224                          | BC079060                  | 10930632        | 1.71        | 23        | 2.9         | purple       | similar to RIKEN cDNA 2610042L04 (chrUn)                            |
| LOC501224                          | BC079060                  | 10772821        | 1.71        | 29        | 3.3         | purple       | similar to RIKEN cDNA 2610042L04 (chr14)                            |
| MGC94207                           | BC081992                  | 10905124        | 0.80        | -45       | 4.6         | red          | similar to RIKEN cDNA C030006K11                                    |
| RGD1305158                         | BC167112                  | 10875932        | 1.25        | 26        | 1.9         | brwn         | similar to RIKEN cDNA 1810030N24                                    |
| RGD1306583                         | BC088172                  | 10821134        | 1.22        | 152       | 2.1         | red          | similar to RIKEN cDNA 2410002O22 gene                               |
| RGD1559896                         | NM_001109134              | 10811906        | 0.78        | -55       | 1.2         | gr60         | similar to RIKEN cDNA 2310022B05                                    |
| RGD1565096                         | NM_001134611              | 10725270        | 1.34        | 16        | 0.4         | l-yel        | similar to TSG118.1                                                 |
| Mir143                             | NR_031889                 | 10804712        | 0.64        | -15       | 0.0         | grey         | microRNA mir-143                                                    |
| Mir145                             | NR_031891                 | 10804710        | 0.61        | -21       | 0.0         | grey         | microRNA mir-145                                                    |
| Mir22                              | NR_031824                 | 10735887        | 0.76        | -20       | 1.5         | purple       | microRNA mir-22                                                     |
| Mirlet7a-2                         | NR_031801                 | 10909373        | 0.65        | -11       | 0.0         | grey         | microRNA let-7a-2                                                   |
|                                    | ENSRNOT00000063746        | 10800599        | 0.68        | -12       | 0.9         | purple       |                                                                     |
|                                    | ENSRNOT00000056831        | 10847901        | 0.79        | -20       | 0.0         | grey         |                                                                     |
|                                    | ENSRNOT00000055440        | 10859772        | 1.55        | 12        | 0.0         | grey         |                                                                     |
|                                    | ENSRNOT00000055404        | 10899204        | 1.25        | 129       | 4.9         | brwn         |                                                                     |
|                                    | ENSRNOT00000054583        | 10870010        | 0.79        | -10       | 0.0         | grey         |                                                                     |
|                                    | ENSRNOT00000054033        | 10733721        | 1.38        | 16        | 0.0         | grey         |                                                                     |
|                                    | ENSRNOT00000053807        | 10909360        | 1.55        | 205       | 1.2         | green        |                                                                     |
|                                    | ENSRNOT00000053549        | 10886261        | 1.33        | 14        | 1.0         | gr-yel       |                                                                     |
|                                    | <b>ENSRNOT00000053327</b> | <b>10722377</b> | <b>1.73</b> | <b>16</b> | <b>15.4</b> | <b>green</b> |                                                                     |
|                                    | ENSRNOT00000053268        | 10909356        | 1.35        | 274       | 1.8         | gr-yel       |                                                                     |
|                                    | ENSRNOT00000052939        | 10816564        | 1.46        | 17        | 0.0         | grey         |                                                                     |
|                                    | ENSRNOT00000052253        | 10802934        | 1.30        | 13        | 0.0         | grey         |                                                                     |
|                                    | ENSRNOT00000042358        | 10779954        | 1.22        | 14        | 0.0         | grey         |                                                                     |
|                                    | ENSRNOT00000037885        | 10885903        | 0.71        | -23       | 0.0         | grey         |                                                                     |
|                                    | ENSRNOT00000037100        | 10767987        | 0.80        | -13       | 0.0         | grey         |                                                                     |
|                                    | ENSRNOT00000035247        | 10755897        | 1.25        | 44        | 15.6        | turq         |                                                                     |
|                                    | ENSRNOT00000034355        | 10920991        | 0.68        | -30       | 0.0         | grey         |                                                                     |
|                                    | ENSRNOT00000010988        | 10918706        | 0.77        | -10       | 0.9         | pink         |                                                                     |
|                                    | ENSRNOT00000008321        | 10884080        | 1.21        | 61        | 0.0         | grey         |                                                                     |
|                                    | BC105775                  | 10878999        | 0.82        | -13       | 1.9         | brwn         |                                                                     |
|                                    | ---                       | 10700081        | 0.76        | -21       | 0.0         | grey         |                                                                     |
|                                    | ---                       | 10701567        | 0.55        | -10       | 0.7         | m-blu        |                                                                     |
|                                    | ---                       | 10700878        | 1.77        | 15        | 0.0         | grey         |                                                                     |
|                                    | ---                       | 10700809        | 1.77        | 36        | 1.4         | purple       |                                                                     |
|                                    | ---                       | 10701313        | 0.80        | -129      | 0.0         | grey         |                                                                     |
|                                    | ---                       | 10701106        | 0.81        | -69       | 0.0         | grey         |                                                                     |
|                                    | ---                       | 10701143        | 0.63        | -29       | 0.0         | grey         |                                                                     |

|     |          |      |     |     |       |  |
|-----|----------|------|-----|-----|-------|--|
| --- | 10700642 | 0.53 | -29 | 0.0 | grey  |  |
| --- | 10701577 | 0.57 | -22 | 0.0 | grey  |  |
| --- | 10701197 | 0.70 | -17 | 0.0 | grey  |  |
| --- | 10700899 | 0.62 | -16 | 0.0 | grey  |  |
| --- | 10700724 | 1.91 | 11  | 2.8 | turq  |  |
| --- | 10700198 | 1.38 | 13  | 1.5 | green |  |
| --- | 10701192 | 1.25 | 13  | 0.0 | grey  |  |
| --- | 10700452 | 1.54 | 14  | 0.0 | grey  |  |
| --- | 10700415 | 1.29 | 28  | 5.6 | turq  |  |
| --- | 10700227 | 2.07 | 51  | 0.0 | grey  |  |
| --- | 10700691 | 1.30 | 316 | 2.7 | brwn  |  |
| --- | 10767985 | 0.82 | -32 | 0.0 | grey  |  |
| --- | 10866193 | 0.78 | -12 | 5.0 | red   |  |
| --- | 10898834 | 1.52 | 17  | 0.0 | grey  |  |
| --- | 10710152 | 1.24 | 30  | 2.0 | black |  |
| --- | 10772272 | 1.24 | 43  | 1.8 | red   |  |

#### F. Male Heart

| Gene Symbol                       | RefSeq/GenBank/<br>Ensemble Number | Affymetrix<br>Probset ID | V/C  | Mean<br>Diff. | k.in | Mod   | Gene Title                                                                                    |
|-----------------------------------|------------------------------------|--------------------------|------|---------------|------|-------|-----------------------------------------------------------------------------------------------|
| <b>CELL CYCLE</b>                 |                                    |                          |      |               |      |       |                                                                                               |
| Cdc73                             | NM_001024769                       | 10768305                 | 1.25 | 72            | 0    | grey  | cell division cycle 73, Paf1/RNA polymerase II complex component, homolog (S. cerevisiae)     |
| Cp110                             | NM_001108501                       | 10710179                 | 0.70 | -13           | 6.7  | brwn  | CP110 protein                                                                                 |
| Ddit4                             | NM_080906                          | 10832920                 | 0.52 | -56           | 14.2 | blue  | DNA-damage-inducible transcript 4                                                             |
| Cdon                              | NM_017358                          | 10908968                 | 0.69 | -29           | 18.4 | brwn  | Cdon homolog (mouse)                                                                          |
| Col4a4                            | NM_001008332                       | 10929396                 | 0.76 | -12           | 0    | grey  | collagen, type IV, alpha 4                                                                    |
| Fn1                               | NM_019143                          | 10928761                 | 0.56 | -111          | 10.9 | brwn  | fibronectin 1                                                                                 |
| Kif5b                             | NM_057202                          | 10795548                 | 1.23 | 212           | 0    | grey  | kinesin family member 5B                                                                      |
| Lad1                              | NM_001107942                       | 10764240                 | 1.46 | 24            | 0    | grey  | ladinin 1                                                                                     |
| Ninj1                             | NM_012867                          | 10797705                 | 0.81 | -28           | 0    | grey  | ninjurin 1                                                                                    |
| Tspan4                            | NM_001013070                       | 10712349                 | 0.64 | -109          | 0    | grey  | tetraspanin 4                                                                                 |
| Tspan8                            | NM_133526                          | 10895499                 | 0.70 | -97           | 6.4  | blue  | tetraspanin 8                                                                                 |
| Tuba1c                            | NM_001011995                       | 10899055                 | 0.79 | -164          | 0    | grey  | tubulin, alpha 1C                                                                             |
| <b>DEVELOPMENT</b>                |                                    |                          |      |               |      |       |                                                                                               |
| Homez                             | NM_152849                          | 10783662                 | 0.74 | -37           | 0    | grey  | homeobox and leucine zipper encoding                                                          |
| Mal                               | NM_012798                          | 10849700                 | 0.77 | -22           | 13.0 | brwn  | mal, T-cell differentiation protein                                                           |
| Ophn1                             | NM_001107848                       | 10938550                 | 1.27 | 12            | 0    | grey  | oligophrenin 1                                                                                |
| Per1                              | NM_001034125                       | 10734882                 | 0.58 | -43           | 0    | grey  | period homolog 1 (Drosophila)                                                                 |
| Slit3                             | NM_031321                          | 10732750                 | 0.70 | -19           | 12.4 | brwn  | slit homolog 3 (Drosophila)                                                                   |
| Sntb2                             | NM_001168674                       | 10807601                 | 0.78 | -28           | 0    | grey  | syntrophin, beta 2                                                                            |
| Tor2a                             | NM_001007744                       | 10835618                 | 0.75 | -33           | 18.4 | brwn  | torsin family 2, member A                                                                     |
| Vang1                             | NM_001109584                       | 10825512                 | 1.24 | 14            | 0.3  | ylw   | vang-like 1 (van gogh, Drosophila)                                                            |
| Rapgef4                           | AB031229                           | 10836890                 | 0.74 | -16           | 0    | grey  | Rap guanine nucleotide exchange factor (GEF) 4                                                |
| Ropn1                             | NM_001025628                       | 10754556                 | 0.71 | -14           | 5.43 | green | ropporin, rhophilin associated protein 1                                                      |
| <b>ELECTRON TRANSPORT</b>         |                                    |                          |      |               |      |       |                                                                                               |
| Cox6b2                            | NM_001039085                       | 10703970                 | 0.83 | -14           | 7.10 | green | cytochrome c oxidase subunit VIb polypeptide 2                                                |
| Cyp2j4                            | NM_023025                          | 10878157                 | 1.35 | 30            | 7.2  | brwn  | cytochrome P450, family 2, subfamily j, polypeptide 4                                         |
| <b>EPIGENETICS</b>                |                                    |                          |      |               |      |       |                                                                                               |
| Ar                                | NM_012502                          | 10934118                 | 0.79 | -54           | 0    | grey  | androgen receptor                                                                             |
| Brd1                              | NM_001108103                       | 10906041                 | 0.83 | -40           | 0    | grey  | bromodomain containing 1                                                                      |
| <b>GOLGI APPARATUS</b>            |                                    |                          |      |               |      |       |                                                                                               |
| Hs3st1                            | NM_053391                          | 10773180                 | 0.73 | -17           | 0    | grey  | heparan sulfate (glucosamine) 3-O-sulfotransferase 1                                          |
| <b>GROWTH FACTORS</b>             |                                    |                          |      |               |      |       |                                                                                               |
| Ccl21b                            | NM_001008513                       | 10876208                 | 0.79 | -13           | 5.2  | ylw   | chemokine (C-C motif) ligand 21b                                                              |
| Figf                              | NM_031761                          | 10937725                 | 0.66 | -27           | 10.3 | brwn  | c-fos induced growth factor                                                                   |
| <b>IMMUNE RESPONSE</b>            |                                    |                          |      |               |      |       |                                                                                               |
| Cd274                             | NM_001191954                       | 10714694                 | 1.39 | 12            | 19.2 | brwn  | CD274 molecule                                                                                |
| Cd4                               | NM_012705                          | 10865585                 | 1.24 | 31            | 14.0 | brwn  | Cd4 molecule                                                                                  |
| <b>METABOLISM &amp; TRANSPORT</b> |                                    |                          |      |               |      |       |                                                                                               |
| Agpat4                            | NM_133406                          | 10718001                 | 0.79 | -12           | 0    | grey  | 1-acylglycerol-3-phosphate O-acyltransferase 4 (lysophosphatidic acid acyltransferase, delta) |
| Alg14                             | NM_001014176                       | 10818690                 | 0.75 | -58           | 9.0  | brwn  | asparagine-linked glycosylation 14 homolog (S. cerevisiae)                                    |
| B3gnt5                            | NM_053932                          | 10755544                 | 1.20 | 18            | 7.4  | brwn  | UDP-GlcNAc:betaGal beta-1,3-N-acetylglucosaminyltransferase 5                                 |
| Edem2                             | NM_001004230                       | 10851076                 | 0.77 | -56           | 19.6 | brwn  | ER degradation enhancer, mannosidase alpha-like 2                                             |
| Ephx1                             | NM_001034090                       | 10770342                 | 0.77 | -288          | 5.0  | brwn  | epoxide hydrolase 1, microsomal                                                               |
| Etnk2                             | ENSRNOT00000032489                 | 10764034                 | 0.83 | -12           | 0    | grey  | ethanolamine kinase 2                                                                         |
| Gltp                              | NM_001134413                       | 10759089                 | 0.79 | -25           | 22.3 | blue  | glycolipid transfer protein                                                                   |

|                                               |                    |          |      |      |      |       |                                                                                                      |
|-----------------------------------------------|--------------------|----------|------|------|------|-------|------------------------------------------------------------------------------------------------------|
| Gtdc1                                         | NM_001024274       | 10845060 | 1.26 | 25   | 0    | grey  | glycosyltransferase-like domain containing 1                                                         |
| Hsd17b11                                      | NM_001004209       | 10771224 | 0.81 | -120 | 0    | grey  | hydroxysteroid (17-beta) dehydrogenase 11                                                            |
| LOC681355                                     | ENSRNOT00000059744 | 10932891 | 1.40 | 10   | 2.2  | brwn  | similar to potassium channel tetramerisation domain containing 12b                                   |
| LOC685152                                     | ENSRNOT00000056606 | 10824550 | 0.69 | -16  | 0    | grey  | similar to Probable phospholipid-transporting ATPase ID (ATPase class I type 8B member 2)            |
| Mthfd2                                        | NM_001109398       | 10870316 | 0.81 | -20  | 8.1  | ylw   | methylenetetrahydrofolate dehydrogenase (NADP+ dependent) 2, methenyltetrahydrofolate cyclohydrolase |
| Nme3                                          | NM_053507          | 10732257 | 0.78 | -41  | 11.4 | blue  | non-metastatic cells 3, protein expressed in                                                         |
| Nup37                                         | NM_001106775       | 10894712 | 0.82 | -30  | 0    | grey  | nucleoporin 37                                                                                       |
| Pcbd1                                         | NM_001007601       | 10830003 | 0.81 | -93  | 1.2  | brwn  | pterin-4 alpha-carbinolamine dehydratase/dimerization cofactor of hepatocyte nuclear factor 1 alpha  |
| Pdia5                                         | NM_001014125       | 10751498 | 0.78 | -15  | 0    | grey  | protein disulfide isomerase family A, member 5                                                       |
| Ppic                                          | NM_001004215       | 10804480 | 0.82 | -35  | 0    | grey  | peptidylprolyl isomerase C                                                                           |
| Slc29a3                                       | NM_181639          | 10833005 | 0.83 | -23  | 11.8 | turq  | solute carrier family 29 (nucleoside transporters), member 3                                         |
| St3gal4                                       | NM_203337          | 10916016 | 0.78 | -20  | 8.0  | brwn  | ST3 beta-galactoside alpha-2,3-sialyltransferase 4                                                   |
| Sulf1                                         | NM_134378          | 10874981 | 0.80 | -18  | 6.3  | brwn  | sulfatase 1                                                                                          |
| Ugp2                                          | NM_001024743       | 10778647 | 1.21 | 284  | 0    | grey  | UDP-glucose pyrophosphorylase 2                                                                      |
| <b>PROTEOLYSIS</b>                            |                    |          |      |      |      |       |                                                                                                      |
| Ctsk                                          | NM_031560          | 10817419 | 0.77 | -46  | 7.2  | brwn  | cathepsin K                                                                                          |
| Uba52                                         | NM_031687          | 10787544 | 0.82 | -249 | 0    | grey  | ubiquitin A-52 residue ribosomal protein fusion product 1                                            |
| Ubxn11                                        | NM_138853          | 10872747 | 0.83 | -14  | 0.86 | green | UBX domain protein 11                                                                                |
| <b>RECEPTORS &amp; BINDING PROTEINS</b>       |                    |          |      |      |      |       |                                                                                                      |
| Crebl2                                        | NM_001015027       | 10859249 | 0.82 | -44  | 0    | grey  | cAMP responsive element binding protein-like 2                                                       |
| LOC683722                                     | NM_001101008       | 10718111 | 0.81 | -23  | 0    | grey  | similar to Fgfr1 oncogene partner                                                                    |
| Lpar6                                         | NM_001045843       | 10781441 | 1.49 | 92   | 0    | grey  | lysophosphatidic acid receptor 6                                                                     |
| Lrp1                                          | NM_001130490       | 10903082 | 0.55 | -180 | 11.8 | brwn  | low density lipoprotein-related protein 1 (alpha-2-macroglobulin receptor)                           |
| Ltbp3                                         | NM_001191561       | 10713123 | 0.71 | -18  | 0    | grey  | latent transforming growth factor beta binding protein 3                                             |
| <b>SIGNALING</b>                              |                    |          |      |      |      |       |                                                                                                      |
| Akap17a                                       | NM_001127246       | 10760783 | 0.77 | -22  | 0    | grey  | A kinase (PRKA) anchor protein 17A                                                                   |
| Arap2                                         | NM_001107216       | 10772863 | 1.24 | 29   | 2.4  | ylw   | ArfGAP with RhoGAP domain, ankyrin repeat and PH domain 2                                            |
| Dtx4                                          | NM_001047855       | 10729009 | 1.28 | 11   | 9.8  | brwn  | deltex homolog 4 (Drosophila)                                                                        |
| Dusp1                                         | NM_053769          | 10732652 | 0.81 | -39  | 0    | grey  | dual specificity phosphatase 1                                                                       |
| Gchfr                                         | NM_133595          | 10838772 | 0.76 | -16  | 3.9  | ylw   | GTP cyclohydrolase 1 feedback regulator                                                              |
| Itgbl1                                        | NM_001017505       | 10782187 | 0.80 | -33  | 3.4  | turq  | integrin, beta-like 1                                                                                |
| Prkcd                                         | NM_133307          | 10789929 | 0.78 | -67  | 0    | grey  | protein kinase C, delta                                                                              |
| Ptk2b                                         | NM_017318          | 10784641 | 0.80 | -14  | 3.1  | blue  | PTK2B protein tyrosine kinase 2 beta                                                                 |
| Ptpn4                                         | NM_001100479       | 10767132 | 1.32 | 83   | 0    | grey  | protein tyrosine phosphatase, non-receptor type 4                                                    |
| RGD1565043                                    | ENSRNOT00000016745 | 10792662 | 0.81 | -12  | 0    | grey  | similar to Rho guanine nucleotide exchange factor (GEF) 10                                           |
| Rqcd1                                         | NM_001009357       | 10924326 | 0.82 | -20  | 1.4  | turq  | rcd1 (required for cell differentiation) homolog 1 (S. pombe)                                        |
| Smad1                                         | NM_013130          | 10806981 | 0.77 | -27  | 2.2  | turq  | SMAD family member 1                                                                                 |
| Srp9                                          | NM_001126095       | 10766378 | 0.83 | -88  | 2.5  | ylw   | signal recognition particle 9                                                                        |
| <b>TRANSCRIPTION</b>                          |                    |          |      |      |      |       |                                                                                                      |
| Ankrd50                                       | NM_001191606       | 10822950 | 0.81 | -22  | 0    | grey  | ankyrin repeat domain 50                                                                             |
| Asb13                                         | NM_001108420       | 10799376 | 0.81 | -39  | 0    | grey  | ankyrin repeat and SOCS box-containing 13                                                            |
| Blzf1                                         | NM_001017494       | 10769468 | 1.23 | 35   | 0    | grey  | basic leucine zipper nuclear factor 1                                                                |
| Ccdc126                                       | NM_001109232       | 10855469 | 1.31 | 31   | 0    | grey  | coiled-coil domain containing 126                                                                    |
| Ccdc80                                        | NM_022543          | 10753982 | 0.79 | -91  | 12.9 | brwn  | coiled-coil domain containing 80                                                                     |
| Ccdc92                                        | NM_001083898       | 10758208 | 0.82 | -21  | 0.6  | ylw   | coiled-coil domain containing 92                                                                     |
| Chchd5                                        | NM_001106509       | 10839767 | 0.79 | -53  | 7.9  | blue  | coiled-coil-helix-coiled-coil-helix domain containing 5                                              |
| Dnajb1                                        | NM_001108441       | 10810295 | 0.78 | -93  | 0    | grey  | DnaJ (Hsp40) homolog, subfamily B, member 1                                                          |
| Fam134b                                       | ENSRNOT00000014423 | 10813951 | 1.72 | 50   | 0    | grey  | family with sequence similarity 134, member B                                                        |
| Klhl11                                        | NM_001105838       | 10747368 | 1.24 | 51   | 0    | grey  | kelch-like 11 (Drosophila)                                                                           |
| Lhfp                                          | NM_001109183       | 10815321 | 0.74 | -31  | 0    | grey  | lipoma HMGIC fusion partner                                                                          |
| Mageh1                                        | NM_001013250       | 10937492 | 0.71 | -20  | 0    | grey  | melanoma antigen, family H, 1                                                                        |
| Mrm1                                          | NM_001108832       | 10745751 | 0.72 | -13  | 0    | grey  | mitochondrial rRNA methyltransferase 1 homolog (S. cerevisiae)                                       |
| Nfxl1                                         | NM_001170438       | 10772474 | 0.71 | -54  | 4.1  | blue  | nuclear transcription factor, X-box binding-like 1                                                   |
| Os9                                           | NM_001007265       | 10895826 | 1.37 | 22   | 0    | grey  | osteosarcoma amplified 9                                                                             |
| Tsc22d3                                       | NM_031345          | 10939516 | 0.68 | -68  | 0    | grey  | TSC22 domain family, member 3                                                                        |
| <b>TRANSLATION &amp; PROTEIN MODIFICATION</b> |                    |          |      |      |      |       |                                                                                                      |
| Parp11                                        | ENSRNOT00000027092 | 10859007 | 0.82 | -13  | 2.2  | brwn  | poly (ADP-ribose) polymerase family, member 11                                                       |
| RGD1559951                                    | ENSRNOT00000004303 | 10936841 | 1.54 | 11   | 0    | grey  | similar to 60S ribosomal protein L37a                                                                |
| Rngtt                                         | NM_001107923       | 10868171 | 1.30 | 53   | 5.8  | blue  | RNA guanylyltransferase and 5'-phosphatase                                                           |
| Rps28                                         | NM_001105730       | 10774372 | 0.82 | -136 | 12.2 | blue  | ribosomal protein S28 (chr14)                                                                        |
| Rps28                                         | NM_001105730       | 10901178 | 0.83 | -220 | 17.1 | blue  | ribosomal protein S28 (chr7)                                                                         |
| Taf11                                         | NM_001008350       | 10831892 | 0.73 | -12  | 8.9  | blue  | TAF11 RNA polymerase II, TATA box binding protein (TBP)-associated factor                            |
| Taf13                                         | NM_001107716       | 10818378 | 0.78 | -47  | 4.2  | ylw   | TAF13 RNA polymerase II, TATA box binding protein (TBP)-associated factor                            |
| Thgl1                                         | NM_001013966       | 10742236 | 0.78 | -17  | 2.8  | ylw   | tRNA-histidine guanylyltransferase 1-like (S. cerevisiae)                                            |
| <b>MISCELLANEOUS &amp; UNKNOWN</b>            |                    |          |      |      |      |       |                                                                                                      |
| Camta1                                        | NM_001195560       | 10881917 | 0.82 | -59  | 0    | grey  | similar to KIAA0833 protein                                                                          |

|              |                           |                 |             |            |             |             |                                                                         |
|--------------|---------------------------|-----------------|-------------|------------|-------------|-------------|-------------------------------------------------------------------------|
| Fam129a      | NM_022242                 | 10764661        | 0.80        | -24        | 0           | grey        | family with sequence similarity 129, member A                           |
| Fam175b      | NM_001106307              | 10711723        | 1.21        | 83         | 23.4        | blue        | family with sequence similarity 175, member B                           |
| Fam55c       | NM_001109435              | 10750825        | 1.20        | 14         | 0           | grey        | family with sequence similarity 55, member C                            |
| LOC100233176 | NM_001142941              | 10891864        | 0.78        | -43        | 1.5         | ylw         | hypothetical protein LOC100233176                                       |
| LOC679583    | ENSRNOT00000050921        | 10871487        | 0.71        | -138       | 9.4         | ylw         | similar to UPF0197 protein C11orf10 homolog (chr5)                      |
| LOC686092    | ENSRNOT00000050090        | 10923334        | 0.71        | -157       | 9.9         | ylw         | similar to UPF0197 protein C11orf10 homolog (chr9)                      |
| Otud1        | ENSRNOT00000022734        | 10796673        | 0.80        | -11        | 0           | grey        | OTU domain containing 1                                                 |
| RGD1308059   | BC091300                  | 10869656        | 1.31        | 14         | 6.8         | brwn        | similar to DNA segment, Chr 4, Brigham & Womens Genetics 0951 expressed |
| RGD1310769   | NM_001106749              | 10891297        | 0.79        | -76        | 8.0         | brwn        | similar to HSPC288                                                      |
| Tmem100      | NM_001017479              | 10737426        | 0.75        | -13        | 9.6         | brwn        | transmembrane protein 100                                               |
| Tmem80       | NM_001017455              | 10712270        | 0.80        | -19        | 0           | grey        | transmembrane protein 80                                                |
| Tmem97       | NM_001008334              | 10745266        | 0.77        | -44        | 0           | grey        | transmembrane protein 97                                                |
| Tsku         | NM_001009965              | 10723822        | 0.77        | -25        | 0           | grey        | tskushin                                                                |
| <b>EST's</b> |                           |                 |             |            |             |             |                                                                         |
| LOC361346    | BC082051                  | 10805100        | 0.80        | -12        | 0           | grey        | similar to chromosome 18 open reading frame 54                          |
| RGD1303066   | NM_212498                 | 10827877        | 1.27        | 19         | 10.9        | ylw         | similar to RIKEN cDNA 2610110G12                                        |
|              | GENSCAN00000023940        | 10919226        | 0.68        | -54        | 0           | grey        |                                                                         |
|              | GENSCAN00000023881        | 10780934        | 0.81        | -14        | 0           | grey        |                                                                         |
|              | FQ230857                  | 10769908        | 0.83        | -44        | 0.4         | pink        |                                                                         |
|              | ENSRNOT00000069216        | 10841294        | 0.60        | -21        | 3.0         | blue        |                                                                         |
|              | <b>ENSRNOT00000063429</b> | <b>10917318</b> | <b>0.80</b> | <b>-12</b> | <b>43.0</b> | <b>blue</b> |                                                                         |
|              | ENSRNOT00000061081        | 10860779        | 1.89        | 21         | 0           | grey        |                                                                         |
|              | ENSRNOT00000060584        | 10809882        | 0.72        | -12        | 0           | grey        |                                                                         |
|              | ENSRNOT00000060432        | 10804017        | 0.70        | -65        | 0           | grey        |                                                                         |
|              | ENSRNOT00000060163        | 10894247        | 0.76        | -11        | 1.7         | blue        |                                                                         |
|              | ENSRNOT00000054563        | 10866957        | 0.60        | -438       | 9.3         | brwn        |                                                                         |
|              | ENSRNOT00000053840        | 10864773        | 0.78        | -17        | 4.4         | ylw         | (chr4)                                                                  |
|              | ENSRNOT00000053840        | 10892704        | 0.78        | -17        | 4.4         | ylw         | (chr6)                                                                  |
|              | ENSRNOT00000053549        | 10886261        | 0.72        | -14        | 0           | grey        |                                                                         |
|              | ENSRNOT00000053169        | 10728728        | 1.54        | 12         | 0           | grey        |                                                                         |
|              | <b>ENSRNOT00000052893</b> | <b>10830298</b> | <b>0.81</b> | <b>-10</b> | <b>48.1</b> | <b>blue</b> |                                                                         |
|              | <b>ENSRNOT00000052494</b> | <b>10713604</b> | <b>1.31</b> | <b>42</b>  | <b>1.5</b>  | <b>pink</b> |                                                                         |
|              | ENSRNOT00000046981        | 10932793        | 1.35        | 24         | 0           | grey        |                                                                         |
|              | ENSRNOT00000045325        | 10879690        | 0.82        | -45        | 7.0         | ylw         |                                                                         |
|              | ENSRNOT00000021054        | 10873830        | 1.24        | 11         | 0           | grey        |                                                                         |
|              | ENSRNOT00000011389        | 10855599        | 0.80        | -20        | 0           | grey        |                                                                         |
|              | ENSRNOT00000002991        | 10772330        | 0.77        | -16        | 0.4         | brwn        |                                                                         |
|              | ---                       | <b>10862453</b> | <b>1.67</b> | <b>115</b> | <b>26.9</b> | <b>blue</b> |                                                                         |
|              | ---                       | 10769693        | 0.78        | -38        | 7.5         | brwn        |                                                                         |
|              | ---                       | 10840063        | 1.45        | 26         | 0           | grey        |                                                                         |
|              | ---                       | 10838324        | 0.82        | -26        | 17.1        | ylw         |                                                                         |
|              | ---                       | 10795986        | 0.72        | -28        | 4.2         | ylw         |                                                                         |
|              | ---                       | 10701507        | 1.75        | 47         | 10.4        | blue        |                                                                         |
|              | ---                       | 10700971        | 0.69        | -13        | 6.1         | blue        |                                                                         |
|              | ---                       | 10700537        | 2.29        | 63         | 5.6         | blue        |                                                                         |
|              | ---                       | 10700618        | 1.59        | 13         | 2.1         | blue        |                                                                         |
|              | ---                       | 10701316        | 1.56        | 27         | 1.8         | blue        |                                                                         |
|              | ---                       | 10700630        | 1.73        | 19         | 7.0         | brwn        |                                                                         |
|              | ---                       | 10701411        | 1.23        | 24         | 2.6         | brwn        |                                                                         |
|              | ---                       | 10701142        | 0.66        | -19        | 2.0         | brwn        |                                                                         |
|              | ---                       | 10700106        | 0.70        | -61        | 0           | grey        |                                                                         |
|              | ---                       | 10701412        | 0.52        | -43        | 0           | grey        |                                                                         |
|              | ---                       | 10701604        | 0.56        | -18        | 0           | grey        |                                                                         |
|              | ---                       | 10700766        | 0.66        | -17        | 0           | grey        |                                                                         |
|              | ---                       | 10700436        | 0.46        | -12        | 0           | grey        |                                                                         |
|              | ---                       | 10700543        | 1.84        | 13         | 0           | grey        |                                                                         |
|              | ---                       | 10701097        | 1.89        | 14         | 0           | grey        |                                                                         |
|              | ---                       | 10700470        | 2.14        | 17         | 0           | grey        |                                                                         |
|              | ---                       | 10700282        | 1.77        | 18         | 0           | grey        |                                                                         |
|              | ---                       | 10700911        | 1.69        | 20         | 0           | grey        |                                                                         |
|              | ---                       | 10700098        | 1.79        | 21         | 0           | grey        |                                                                         |
|              | ---                       | 10701596        | 1.94        | 26         | 0           | grey        |                                                                         |
|              | ---                       | 10701472        | 1.53        | 27         | 0           | grey        |                                                                         |
|              | ---                       | 10700362        | 1.88        | 33         | 0           | grey        |                                                                         |
|              | ---                       | 10701227        | 1.86        | 37         | 0           | grey        |                                                                         |
|              | ---                       | 10700217        | 1.64        | 45         | 0           | grey        |                                                                         |
|              | ---                       | 10701194        | 1.42        | 45         | 0           | grey        |                                                                         |
|              | ---                       | 10701051        | 1.37        | 101        | 0           | grey        |                                                                         |
|              | ---                       | 10700662        | 1.75        | 24         | 0.4         | mgnt        |                                                                         |

|  |     |          |      |     |     |      |  |
|--|-----|----------|------|-----|-----|------|--|
|  | --- | 10700461 | 1.55 | 16  | 0.1 | pink |  |
|  | --- | 10700247 | 1.55 | 51  | 3.9 | turq |  |
|  | --- | 10700518 | 0.61 | -78 | 4.0 | ylw  |  |
|  | --- | 10700795 | 0.51 | -23 | 1.4 | ylw  |  |
|  | --- | 10700263 | 0.66 | -79 | 0.7 | ylw  |  |

### G. Male Kidney

| Gene Symbol             | RefSeq/GenBank/<br>Ensemble Number | Affymetrix<br>Probset ID | V/C         | Mean<br>Diff. | k.in        | Mod          | Gene Title                                                       |
|-------------------------|------------------------------------|--------------------------|-------------|---------------|-------------|--------------|------------------------------------------------------------------|
| <b>APOPTOSIS</b>        |                                    |                          |             |               |             |              |                                                                  |
| Dapk3                   | NM_022546                          | 10900296                 | 0.77        | -64           | 16.6        | brwn         | death-associated protein kinase 3                                |
| Gsdmd                   | NM_001130553                       | 10897096                 | 0.77        | -13           | 0           | grey         | gasdermin D                                                      |
| Lsp1                    | NM_001025420                       | 10712477                 | 0.72        | -46           | 5.7         | brwn         | lymphocyte-specific protein 1                                    |
| Prelid1                 | NM_001009636                       | 10797292                 | 0.76        | -131          | 16.8        | turq         | PRELI domain containing 1                                        |
| Snn                     | NM_001034083                       | 10740408                 | 0.74        | -12           | 0           | grey         | stannin                                                          |
| Tnfrsf12a               | NM_181086                          | 10740869                 | 0.74        | -14           | 0           | grey         | tumor necrosis factor receptor superfamily, member 12a           |
| <b>CELL CYCLE</b>       |                                    |                          |             |               |             |              |                                                                  |
| Bop1                    | NM_001024250                       | 10904930                 | 0.83        | -20           | 24.2        | turq         | block of proliferation 1                                         |
| Ccnl2                   | NM_001013094                       | 10874708                 | 1.47        | 113           | 6.1         | blue         | cyclin L2                                                        |
| Cdkl3                   | NM_001174131                       | 10733401                 | 1.50        | 47            | 0           | grey         | cyclin-dependent kinase-like 3                                   |
| Cdkn2aipnl              | NM_001008278                       | 10733397                 | 0.83        | -72           | 0.6         | ylw          | CDKN2A interacting protein N-terminal like                       |
| Cspp1                   | NM_001191864                       | 10875089                 | 1.72        | 83            | 17.4        | blue         | centrosome and spindle pole associated protein 1                 |
| Ddit4                   | NM_080906                          | 10832920                 | 0.68        | -32           | 14.2        | blue         | DNA-damage-inducible transcript 4                                |
| G2e3                    | NM_001106726                       | 10884489                 | 1.39        | 58            | 0           | grey         | G2/M-phase specific E3 ubiquitin ligase                          |
| Mcm2                    | NM_001107873                       | 10863950                 | 0.63        | -34           | 10.9        | blue         | minichromosome maintenance complex component 2                   |
| Orc2l                   | NM_001012003                       | 10928254                 | 1.25        | 42            | 0           | grey         | origin recognition complex, subunit 2-like (yeast)               |
| <b>CYTOSKELETON-ECM</b> |                                    |                          |             |               |             |              |                                                                  |
| Actr1b                  | NM_001039028                       | 10927413                 | 0.77        | -46           | 24.3        | turq         | ARP1 actin-related protein 1 homolog B (yeast)                   |
| Arpc1b                  | NM_019289                          | 10760196                 | 0.76        | -128          | 17.3        | ylw          | actin related protein 2/3 complex, subunit 1B                    |
| Capg                    | NM_001013086                       | 10856415                 | 0.70        | -33           | 0           | grey         | capping protein (actin filament), gelsolin-like                  |
| <b>Ceacam6</b>          | <b>NM_001103358</b>                | <b>10705037</b>          | <b>1.32</b> | <b>11</b>     | <b>9.29</b> | <b>green</b> | <b>carcinoembryonic antigen-related cell adhesion molecule 6</b> |
| Col3a1                  | NM_032085                          | 10923052                 | 0.77        | -64           | 13.9        | brwn         | collagen, type III, alpha 1                                      |
| Col4a1                  | NM_001135009                       | 10789594                 | 0.82        | -14           | 16.0        | brwn         | collagen, type IV, alpha 1                                       |
| Coro1a                  | NM_130411                          | 10725806                 | 0.73        | -28           | 0           | grey         | coronin, actin binding protein 1A                                |
| Des                     | NM_022531                          | 10924507                 | 0.70        | -57           | 0           | grey         | desmin                                                           |
| Emd                     | NM_012948                          | 10940413                 | 0.74        | -32           | 11.2        | turq         | emerin                                                           |
| Eml5                    | ENSRNOT00000057601                 | 10891548                 | 1.45        | 15            | 0           | grey         | echinoderm microtubule associated protein like 5                 |
| Esco1                   | BC166441                           | 10767013                 | 1.33        | 107           | 0           | grey         | establishment of cohesion 1 homolog 1 (S. cerevisiae)            |
| Fxc1                    | NM_053371                          | 10833834                 | 0.54        | -16           | 0           | grey         | fractured callus expressed transcript 1                          |
| Kif16b                  | NM_001107783                       | 10850321                 | 1.21        | 52            | 0           | grey         | kinesin family member 16B                                        |
| Krt40                   | ENSRNOT00000045189                 | 10747139                 | 1.38        | 25            | 4.0         | blue         | keratin 40                                                       |
| Lmna                    | NM_001002016                       | 10824322                 | 0.82        | -30           | 21.7        | turq         | lamin A                                                          |
| LOC494539               | AY856054                           | 10722165                 | 1.55        | 11            | 2.2         | blue         | spectrin beta-like                                               |
| Mcoln1                  | NM_001105903                       | 10759698                 | 0.83        | -33           | 20.6        | blue         | mucolipin 1                                                      |
| Mynn                    | NM_001012178                       | 10822697                 | 1.20        | 21            | 0           | grey         | myoneurin                                                        |
| Nid67                   | NM_173126                          | 10804562                 | 0.80        | -19           | 19.5        | blue         | putative small membrane protein NID67                            |
| Ninj1                   | NM_012867                          | 10797705                 | 0.74        | -38           | 0           | grey         | ninjurin 1                                                       |
| Ninl                    | ENSRNOT00000068689                 | 10850688                 | 1.52        | 12            | 5.8         | blue         | ninein-like                                                      |
| Pfn1                    | NM_022511                          | 10744494                 | 0.82        | -161          | 20.1        | turq         | profilin 1                                                       |
| <b>Plp2</b>             | <b>NM_207601</b>                   | <b>10932534</b>          | <b>0.66</b> | <b>-147</b>   | <b>38.4</b> | <b>turq</b>  | <b>proteolipid protein 2 (colonic epithelium-enriched)</b>       |
| Shroom2                 | NM_001047893                       | 10937601                 | 1.23        | 22            | 0           | grey         | shroom family member 2                                           |
| Sorbs2                  | NM_053770                          | 10791750                 | 1.23        | 39            | 0.76        | green        | sorbin and SH3 domain containing 2                               |
| Tpbp                    | NM_031807                          | 10912003                 | 0.72        | -20           | 0           | grey         | trophoblast glycoprotein                                         |
| Tpm2                    | NM_001024345                       | 10876324                 | 0.81        | -15           | 0           | grey         | tropomyosin 2, beta                                              |
| Tspan4                  | NM_001013070                       | 10712349                 | 0.73        | -76           | 0           | grey         | tetraspanin 4                                                    |
| Tspan6                  | NM_001100672                       | 10939233                 | 1.32        | 180           | 11.1        | turq         | tetraspanin 6                                                    |
| Tubb5                   | NM_173102                          | 10827906                 | 0.78        | -96           | 8.9         | brwn         | tubulin, beta 5                                                  |
| <b>Vim</b>              | <b>NM_031140</b>                   | <b>10796445</b>          | <b>0.66</b> | <b>-372</b>   | <b>22.9</b> | <b>brwn</b>  | <b>vimentin</b>                                                  |
| Zfc3h1                  | ENSRNOT00000058444                 | 10895458                 | 1.39        | 87            | 8.0         | blue         | zinc finger, C3H1-type containing                                |
| <b>DEVELOPMENT</b>      |                                    |                          |             |               |             |              |                                                                  |
| Aamp                    | NM_001106920                       | 10928890                 | 0.80        | -83           | 18.4        | turq         | angio-associated, migratory cell protein                         |
| Ahi1                    | NM_001002277                       | 10702025                 | 1.22        | 25            | 20.9        | brwn         | Abelson helper integration site 1                                |
| Atxn3                   | NM_021702                          | 10891818                 | 1.25        | 46            | 8.7         | blue         | ataxin 3                                                         |
| Bbs4                    | NM_001106826                       | 10917954                 | 1.29        | 45            | 0           | grey         | Bardet-Biedl syndrome 4                                          |
| Bloc1s3                 | ENSRNOT00000023457                 | 10719466                 | 0.75        | -23           | 16.0        | blue         | biogenesis of lysosomal organelles complex-1, subunit 3          |
| Ccm2                    | NM_001126275                       | 10774104                 | 0.78        | -45           | 14.9        | blue         | cerebral cavernous malformation 2                                |
| Cwh43                   | NM_001191677                       | 10776547                 | 1.36        | 21            | 2.2         | brwn         | cell wall biogenesis 43 C-terminal homolog (S. cerevisiae)       |
| Diaph2                  | ENSRNOT00000034461                 | 10934829                 | 1.26        | 30            | 0           | grey         | diaphanous homolog 2 (Drosophila)                                |

|                           |                           |                 |             |             |             |             |                                                                                       |
|---------------------------|---------------------------|-----------------|-------------|-------------|-------------|-------------|---------------------------------------------------------------------------------------|
| Dpy19l4                   | ENSRNOT00000037869        | 10875464        | 1.23        | 42          | 0           | grey        | dpy-19-like 4 (C. elegans)                                                            |
| <b>Dyt1</b>               | <b>NM_153303</b>          | <b>10844229</b> | <b>0.76</b> | <b>-25</b>  | <b>21.5</b> | <b>brwn</b> | <b>dystonia 1</b>                                                                     |
| Far1                      | NM_001011933              | 10710051        | 1.23        | 147         | 0           | grey        | fatty acyl CoA reductase 1                                                            |
| Fxr1                      | NM_001012179              | 10814833        | 1.23        | 345         | 0           | grey        | fragile X mental retardation, autosomal homolog 1                                     |
| LOC687994                 | ENSRNOT00000030501        | 10867109        | 1.27        | 51          | 0.6         | pink        | similar to 82-kD FMRP Interacting Protein                                             |
| Neu1                      | NM_031522                 | 10831300        | 0.80        | -42         | 0           | grey        | sialidase 1 (lysosomal sialidase)                                                     |
| Oaf                       | NM_001014090              | 10916659        | 0.82        | -32         | 12.6        | brwn        | OAF homolog (Drosophila)                                                              |
| Ophn1                     | NM_001107848              | 10938550        | 1.27        | 12          | 0           | grey        | oligophrenin 1                                                                        |
| Osgin2                    | ENSRNOT00000012394        | 10875642        | 1.28        | 15          | 0.1         | black       | oxidative stress induced growth inhibitor family member 2                             |
| Per1                      | NM_001034125              | 10734882        | 0.58        | -43         | 0           | grey        | period homolog 1 (Drosophila)                                                         |
| Pkhd1                     | ENSRNOT00000060760        | 10926851        | 1.34        | 14          | 0           | grey        | polycystic kidney and hepatic disease 1                                               |
| RGD1359378                | NM_001007658              | 10897045        | 0.76        | -21         | 0           | grey        | mesenchymal stem cell protein DSCD75                                                  |
| Sectm1b                   | NM_199082                 | 10749762        | 0.73        | -19         | 12.6        | blue        | secreted and transmembrane 1B                                                         |
| Sfrp2                     | NM_001100700              | 10816144        | 1.48        | 24          | 3.4         | brwn        | secreted frizzled-related protein 2                                                   |
| Spata5                    | NM_001108549              | 10815032        | 1.42        | 46          | 0           | grey        | spermatogenesis associated 5                                                          |
| Ssb                       | NM_031119                 | 10858083        | 1.25        | 161         | 7.6         | blue        | Sjogren syndrome antigen B                                                            |
| Tex264                    | NM_001007665              | 10919960        | 0.82        | -75         | 4.4         | blue        | testis expressed 264                                                                  |
| Trpm7                     | AF375874                  | 10849556        | 1.32        | 117         | 0           | grey        | transient receptor potential cation channel, subfamily M, member 7                    |
| Wbscr27                   | NM_001109499              | 10761247        | 0.76        | -30         | 22.6        | blue        | Williams Beuren syndrome chromosome region 27 (chr12)                                 |
| Wbscr27                   | NM_001109499              | 10768112        | 0.72        | -42         | 16.6        | blue        | Williams Beuren syndrome chromosome region 27 (chr13)                                 |
| <b>Yif1</b>               | <b>NM_172017</b>          | <b>10712999</b> | <b>0.82</b> | <b>-87</b>  | <b>33.7</b> | <b>brwn</b> | <b>Yip1 interacting factor homolog (S. cerevisiae)</b>                                |
| Zfp280d                   | NM_001108165              | 10911395        | 1.34        | 59          | 7.6         | turq        | zinc finger protein 280D                                                              |
| <b>DNA REPAIR</b>         |                           |                 |             |             |             |             |                                                                                       |
| Lig4                      | NM_001106095              | 10789670        | 1.44        | 74          | 0.7         | pink        | ligase IV, DNA, ATP-dependent                                                         |
| Pnkp                      | NM_001004259              | 10706650        | 0.83        | -17         | 0           | grey        | polynucleotide kinase 3'-phosphatase                                                  |
| <b>ELECTRON TRANSPORT</b> |                           |                 |             |             |             |             |                                                                                       |
| Cox8a                     | NM_134345                 | 10728383        | 0.80        | -462        | 5.7         | blue        | cytochrome c oxidase subunit VIIIa                                                    |
| Gpx7                      | NM_001106673              | 10878635        | 0.83        | -23         | 4.1         | turq        | glutathione peroxidase 7                                                              |
| <b>Prdx2</b>              | <b>NM_017169</b>          | <b>10810018</b> | <b>0.80</b> | <b>-182</b> | <b>28.4</b> | <b>brwn</b> | <b>peroxiredoxin 2</b>                                                                |
| <b>EPIGENETICS</b>        |                           |                 |             |             |             |             |                                                                                       |
| Akap8l                    | NM_001013946              | 10900988        | 1.46        | 67          | 1.4         | turq        | A kinase (PRKA) anchor protein 8-like                                                 |
| Asmtl                     | NM_001105915              | 10757162        | 0.78        | -19         | 24.1        | blue        | acetylserotonin O-methyltransferase-like                                              |
| Atrx                      | D64059                    | 10938897        | 1.24        | 55          | 3.8         | blue        | alpha thalassemia/mental retardation syndrome X-linked (RAD54 homolog, S. cerevisiae) |
| Chd6                      | NM_001107797              | 10851407        | 1.28        | 28          | 0           | grey        | chromodomain helicase DNA binding protein 6                                           |
| Ddx5                      | NM_001007613              | 10748347        | 1.21        | 386         | 0           | grey        | DEAD (Asp-Glu-Ala-Asp) box polypeptide 5                                              |
| Dot1l                     | NM_001108733              | 10900419        | 1.27        | 13          | 5.6         | blue        | DOT1-like, histone H3 methyltransferase (S. cerevisiae)                               |
| Erc4                      | ENSRNOT00000004563        | 10731331        | 1.28        | 24          | 0           | grey        | excision repair cross-complementing rodent repair deficiency, complementation group 4 |
| Erc5                      | NM_001106910              | 10923012        | 1.24        | 28          | 0           | grey        | excision repair cross-complementing rodent repair deficiency, complementation group 5 |
| Gadd45gip1                | NM_001100504              | 10810059        | 0.77        | -26         | 16.4        | brwn        | growth arrest and DNA-damage-inducible, gamma interacting protein 1                   |
| Hist1h1b                  | NM_001109417              | 10795291        | 0.80        | -17         | 0           | grey        | histone cluster 1, H1b                                                                |
| Hist1h2ail                | NM_001013056              | 10798455        | 0.78        | -71         | 10.6        | ylw         | histone cluster 1, H2ai-like                                                          |
| Hist2h3c2                 | NM_001107698              | 10817535        | 0.79        | -26         | 0           | grey        | histone cluster 2, H3c2                                                               |
| Kdm3a                     | NM_175764                 | 10863125        | 1.32        | 78          | 0           | grey        | lysine (K)-specific demethylase 3A                                                    |
| Kdm4a                     | NM_001107966              | 10879110        | 1.22        | 27          | 7.7         | turq        | lysine (K)-specific demethylase 4A                                                    |
| Mbd3                      | NM_001108735              | 10893852        | 0.73        | -76         | 0           | grey        | methyl-CpG binding domain protein 3                                                   |
| Mgea5                     | NM_131904                 | 10730452        | 1.29        | 155         | 5.8         | ylw         | meningioma expressed antigen 5 (hyaluronidase)                                        |
| Phf20l1                   | NM_001025702              | 10896862        | 1.30        | 70          | 20.0        | blue        | PHD finger protein 20-like 1                                                          |
| Setdb1                    | ENSRNOT00000028709        | 10825003        | 1.24        | 50          | 0           | grey        | SET domain, bifurcated 1                                                              |
| Suv420h2                  | NM_001107475              | 10718873        | 1.34        | 17          | 0           | grey        | suppressor of variegation 4-20 homolog 2 (Drosophila)                                 |
| Syne1                     | AF452647                  | 10717620        | 1.32        | 10          | 6.0         | ylw         | spectrin repeat containing, nuclear envelope 1                                        |
| Tbpl1                     | NM_001127201              | 10702309        | 1.27        | 154         | 0           | grey        | TATA box binding protein-like 1                                                       |
| <b>GOLGI APPARATUS</b>    |                           |                 |             |             |             |             |                                                                                       |
| B4galt6                   | NM_031740                 | 10803394        | 0.82        | -23         | 0           | grey        | UDP-Gal:betaGlcNAc beta 1,4-galactosyltransferase, polypeptide 6                      |
| Ap1s1                     | BC168682                  | 10932646        | 1.23        | 223         | 0           | grey        | adaptor-related protein complex 1, sigma 1 subunit                                    |
| Ap1s3                     | NM_001172150              | 10929267        | 1.27        | 35          | 0           | grey        | adaptor-related protein complex 1, sigma 3 subunit                                    |
| <b>LOC685079</b>          | <b>ENSRNOT00000030054</b> | <b>10842117</b> | <b>0.71</b> | <b>-122</b> | <b>24.9</b> | <b>brwn</b> | <b>similar to Protein SYS1 homolog</b>                                                |
| Manbal                    | NM_001173380              | 10841619        | 0.79        | -56         | 10.3        | brwn        | mannosidase, beta A, lysosomal-like                                                   |
| Plbd2                     | NM_139255                 | 10758830        | 0.77        | -86         | 17.5        | turq        | phospholipase B domain containing 2                                                   |
| <b>GROWTH FACTORS</b>     |                           |                 |             |             |             |             |                                                                                       |
| Ccr7                      | NM_199489                 | 10747024        | 1.45        | 10          | 0           | grey        | chemokine (C-C motif) receptor 7                                                      |
| Cxcl11                    | NM_182952                 | 10771649        | 0.73        | -13         | 3.8         | blue        | chemokine (C-X-C motif) ligand 11                                                     |
| Hdgfl1                    | NM_133549                 | 10795072        | 1.43        | 16          | 1.7         | red         | hepatoma derived growth factor-like 1                                                 |
| Kitlg                     | NM_021843                 | 10895152        | 1.30        | 68          | 6.4         | turq        | KIT ligand                                                                            |
| Ogfr                      | NM_053340                 | 10842839        | 0.81        | -44         | 13.4        | brwn        | opioid growth factor receptor                                                         |
| <b>IMMUNE RESPONSE</b>    |                           |                 |             |             |             |             |                                                                                       |
| C1qa                      | NM_001008515              | 10880734        | 0.65        | -80         | 7.0         | brwn        | complement component 1, q subcomponent, A chain                                       |



|                                   |                     |                 |             |             |             |             |                                                                                                               |
|-----------------------------------|---------------------|-----------------|-------------|-------------|-------------|-------------|---------------------------------------------------------------------------------------------------------------|
| C3                                | NM_016994           | 10931717        | 0.74        | -27         | 1.2         | brwn        | complement component 3                                                                                        |
| Cfi                               | NM_024157           | 10819013        | 0.77        | -10         | 9.7         | brwn        | complement factor I                                                                                           |
| Ctgf                              | NM_022266           | 10717233        | 0.75        | -17         | 7.1         | turq        | connective tissue growth factor                                                                               |
| F8a1                              | NM_001109323        | 10935873        | 0.75        | -33         | 14.3        | turq        | coagulation factor VIII-associated (intronic transcript) 1                                                    |
| Ica1                              | NM_030844           | 10861005        | 1.36        | 44          | 0           | grey        | islet cell autoantigen 1                                                                                      |
| Irf3                              | NM_001006969        | 10706696        | 1.35        | 44          | 0.6         | pink        | interferon regulatory factor 3                                                                                |
| Kira17                            | NM_001172088        | 10866098        | 0.68        | -21         | 1.5         | ylw         | killer cell lectin-like receptor, subfamily A, member 17                                                      |
| RT1-DMa                           | NM_198741           | 10831628        | 0.81        | -34         | 1.6         | brwn        | RT1 class II, locus DMA                                                                                       |
| RT1-S3                            | NM_001008886        | 10827809        | 0.83        | -26         | 0           | grey        | RT1 class Ib, locus S3                                                                                        |
| Unc93b1                           | NM_001108513        | 10712720        | 0.64        | -28         | 10.2        | brwn        | unc-93 homolog B1 (C. elegans)                                                                                |
| Vsig1                             | NM_001037784        | 10935234        | 1.43        | 28          | 0           | grey        | V-set and immunoglobulin domain containing 1                                                                  |
| <b>METABOLISM &amp; TRANSPORT</b> |                     |                 |             |             |             |             |                                                                                                               |
| Agpat4                            | NM_133406           | 10718001        | 0.77        | -13         | 0           | grey        | 1-acylglycerol-3-phosphate O-acyltransferase 4 (lysophosphatidic acid acyltransferase, delta)                 |
| Akr1c19                           | NM_001100576        | 10796050        | 1.47        | 24          | 10.1        | brwn        | aldo-keto reductase family 1, member C19                                                                      |
| Alad                              | NM_012899           | 10877433        | 0.70        | -39         | 15.5        | brwn        | aminolevulinate, delta-, dehydratase (chr5)                                                                   |
| Alad                              | NM_012899           | 10884914        | 0.78        | -49         | 26.1        | turq        | aminolevulinate, delta-, dehydratase (chr6)                                                                   |
| Aldh16a1                          | NM_001033706        | 10721649        | 0.78        | -19         | 5.9         | brwn        | aldehyde dehydrogenase 16 family, member A1                                                                   |
| Asns                              | NM_013079           | 10860951        | 0.68        | -58         | 0           | grey        | asparagine synthetase                                                                                         |
| Atox1                             | NM_053359           | 10742813        | 0.83        | -39         | 12.7        | brwn        | ATX1 antioxidant protein 1 homolog (yeast)                                                                    |
| <b>Atp5e</b>                      | <b>BC058133</b>     | <b>10773636</b> | <b>0.83</b> | <b>-194</b> | <b>58.2</b> | <b>ylw</b>  | <b>ATP synthase, H+ transporting, mitochondrial F1 complex, epsilon subunit</b>                               |
| B3gnt1                            | NM_001106324        | 10712975        | 0.78        | -16         | 9.1         | blue        | UDP-GlcNAc:betaGal beta-1,3-N-acetylglucosaminyltransferase 1                                                 |
| Cacla1d                           | NM_017298           | 10789869        | 1.36        | 10          | 0           | grey        | calcium channel, voltage-dependent, L type, alpha 1D subunit                                                  |
| Car8                              | NM_001009662        | 10875375        | 1.37        | 34          | 16.0        | turq        | carbonic anhydrase 8                                                                                          |
| Cox11                             | NM_001109575        | 10737438        | 1.25        | 21          | 0           | grey        | COX11 homolog, cytochrome c oxidase assembly protein (yeast)                                                  |
| Cpox                              | NM_001037095        | 10753574        | 1.29        | 54          | 3.7         | turq        | coproporphyrinogen oxidase                                                                                    |
| Dpagt1                            | NM_199388           | 10909470        | 0.80        | -72         | 24.8        | turq        | dolichyl-phosphate (UDP-N-acetylglucosamine) N-acetylglucosaminophosphotransferase 1 (GlcNAc-1-P transferase) |
| Endog                             | NM_001034938        | 10844136        | 1.28        | 25          | 6.6         | brwn        | endonuclease G                                                                                                |
| Ero1b                             | NM_001191893        | 10799038        | 1.27        | 70          | 0           | grey        | ERO1-like beta (S. cerevisiae)                                                                                |
| Esyt1                             | NM_017249           | 10899793        | 0.74        | -73         | 7.5         | brwn        | extended synaptotagmin-like protein 1                                                                         |
| Exosc4                            | NM_001134860        | 10897169        | 0.83        | -12         | 15.4        | blue        | exosome component 4                                                                                           |
| G6pd                              | NM_017006           | 10936048        | 0.78        | -46         | 0           | grey        | glucose-6-phosphate dehydrogenase                                                                             |
| Gltp                              | NM_001134413        | 10759089        | 0.72        | -35         | 22.3        | blue        | glycolipid transfer protein                                                                                   |
| Gpam                              | NM_017274           | 10730898        | 1.28        | 126         | 0           | grey        | glycerol-3-phosphate acyltransferase, mitochondrial                                                           |
| <b>Gusb</b>                       | <b>NM_017015</b>    | <b>10757986</b> | <b>0.76</b> | <b>-18</b>  | <b>33.3</b> | <b>blue</b> | <b>glucuronidase, beta</b>                                                                                    |
| Hexdc                             | NM_001142562        | 10740221        | 1.37        | 12          | 0.8         | pink        | hexosaminidase (glycosyl hydrolase family 20, catalytic domain) containing                                    |
| Hmox2                             | NM_024387           | 10740681        | 1.20        | 20          | 0           | grey        | heme oxygenase (decycling) 2                                                                                  |
| Impdh2                            | NM_199099           | 10913186        | 0.81        | -86         | 0           | grey        | IMP (inosine monophosphate) dehydrogenase 2                                                                   |
| Kik1l                             | NM_012593           | 10706488        | 1.36        | 15          | 0           | grey        | kallikrein 1-like peptidase                                                                                   |
| LOC303140                         | DQ119106            | 10742657        | 1.30        | 18          | 0           | grey        | up-regulator of carnitine transporter, OCTN2                                                                  |
| <b>LOC691431</b>                  | <b>BC167066</b>     | <b>10881812</b> | <b>0.71</b> | <b>-43</b>  | <b>22.2</b> | <b>brwn</b> | <b>similar to mitochondrial carrier protein MGC4399</b>                                                       |
| Lrba                              | NM_001108555        | 10816204        | 1.21        | 56          | 4.4         | turq        | LPS-responsive vesicle trafficking, beach and anchor containing                                               |
| Mblac1                            | NM_001024996        | 10757247        | 0.73        | -16         | 10.4        | ylw         | metallo-beta-lactamase domain containing 1                                                                    |
| Mfsd3                             | NM_001024908        | 10897372        | 0.76        | -19         | 12.4        | turq        | major facilitator superfamily domain containing 3                                                             |
| Mpst                              | NM_138843           | 10897446        | 0.80        | -23         | 7.7         | turq        | mercaptopyruvate sulfurtransferase                                                                            |
| Mri1                              | NM_001010947        | 10806698        | 0.81        | -18         | 15.9        | brwn        | methylthioribose-1-phosphate isomerase homolog (S. cerevisiae)                                                |
| Naaa                              | NM_001010967        | 10771690        | 0.73        | -24         | 16.2        | brwn        | N-acyl ethanolamine acid amidase                                                                              |
| Ndufa11                           | NM_212517           | 10931382        | 0.82        | -136        | 11.8        | blue        | NADH dehydrogenase (ubiquinone) 1 alpha subcomplex 11                                                         |
| Nme1                              | NM_138548           | 10746276        | 0.76        | -41         | 13.3        | brwn        | non-metastatic cells 1, protein (NM23A) expressed in                                                          |
| Nqo1                              | NM_017000           | 10810867        | 0.72        | -16         | 0           | grey        | NAD(P)H dehydrogenase, quinone 1                                                                              |
| Nrd1                              | NM_012993           | 10870856        | 1.36        | 280         | 15.9        | blue        | nardilysin 1 (N-arginine dibasic convertase)                                                                  |
| Nup205                            | NM_001108620        | 10854494        | 1.25        | 18          | 6.6         | turq        | nucleoporin 205                                                                                               |
| P4ha2                             | NM_001108275        | 10733564        | 0.77        | -27         | 2.5         | turq        | prolyl 4-hydroxylase, alpha polypeptide II                                                                    |
| Pafah1b3                          | NM_053654           | 10719817        | 0.77        | -24         | 4.8         | brwn        | platelet-activating factor acetylhydrolase, isoform 1b, subunit 3                                             |
| Pcmtd2                            | NM_001107810        | 10843125        | 1.22        | 132         | 2.2         | brwn        | protein-L-isoaspartate (D-aspartate) O-methyltransferase domain containing 2                                  |
| Pea15a                            | NM_001013231        | 10769954        | 0.81        | -54         | 12.1        | brwn        | phosphoprotein enriched in astrocytes 15A                                                                     |
| Plcd4                             | NM_080688           | 10924335        | 1.32        | 10          | 1.4         | red         | phospholipase C, delta 4                                                                                      |
| Por                               | NM_031576           | 10761162        | 0.76        | -78         | 0           | grey        | P450 (cytochrome) oxidoreductase                                                                              |
| Ptges2                            | NM_001107832        | 10835597        | 0.74        | -32         | 21.1        | turq        | prostaglandin E synthase 2                                                                                    |
| RGD1562373                        | NM_001040019        | 10920820        | 0.79        | -33         | 0           | grey        | similar to 3-ketoacyl-CoA thiolase B, peroxisomal precursor (Beta-ketothiolase B)                             |
| RGD1565002                        | ENSRNOT00000007645  | 10890537        | 0.82        | -46         | 7.5         | brwn        | short-chain dehydrogenase/reductase 4)                                                                        |
| <b>Rhbdd2</b>                     | <b>NM_001191827</b> | <b>10761180</b> | <b>0.78</b> | <b>-38</b>  | <b>46.4</b> | <b>turq</b> | <b>rhomboid domain containing 2</b>                                                                           |
| Sat1                              | NM_001007667        | 10933716        | 1.31        | 122         | 4.8         | ylw         | spermidine/spermine N1-acetyl transferase 1                                                                   |
| Selm                              | NM_001115013        | 10773716        | 0.62        | -12         | 0           | grey        | selenoprotein M                                                                                               |
| Shmt2                             | NM_001008322        | 10903061        | 0.83        | -47         | 7.0         | turq        | serine hydroxymethyltransferase 2 (mitochondrial)                                                             |
| <b>Slc16a7</b>                    | <b>NM_017302</b>    | <b>10902868</b> | <b>1.34</b> | <b>179</b>  | <b>21.5</b> | <b>brwn</b> | <b>solute carrier family 16, member 7 (monocarboxylic acid transporter 2)</b>                                 |
| Slc17a3                           | NM_153622           | 10795218        | 1.20        | 11          | 0           | grey        | solute carrier family 17 (sodium phosphate), member 3                                                         |

|                                         |                     |                 |             |            |             |             |                                                                                        |
|-----------------------------------------|---------------------|-----------------|-------------|------------|-------------|-------------|----------------------------------------------------------------------------------------|
| Slc20a2                                 | NM_017223           | 10792441        | 0.82        | -35        | 5.6         | ylw         | solute carrier family 20 (phosphate transporter), member 2                             |
| Slc22a1                                 | NM_012697           | 10703045        | 0.78        | -17        | 2.2         | blue        | solute carrier family 22 (organic cation transporter), member 1                        |
| Slc25a10                                | NM_133418           | 10740159        | 0.74        | -61        | 7.5         | brwn        | solute carrier family 25 (mitochondrial carrier; dicarboxylate transporter), member 10 |
| Slc25a2                                 | NM_001106152        | 10804013        | 1.41        | 25         | 0           | grey        | solute carrier family 25 (mitochondrial carrier, ornithine transporter) member 2       |
| Slc26a4                                 | NM_019214           | 10889541        | 1.45        | 15         | 5.0         | brwn        | solute carrier family 26, member 4                                                     |
| Slc30a2                                 | NM_001083122        | 10872780        | 0.82        | -17        | 0           | grey        | solute carrier family 30 (zinc transporter), member 2                                  |
| <b>Slc30a3</b>                          | <b>NM_001013243</b> | <b>10883162</b> | <b>1.40</b> | <b>15</b>  | <b>2.5</b>  | <b>red</b>  | <b>solute carrier family 30 (zinc transporter), member 3</b>                           |
| Slc38a10                                | ENSRNOT00000006136  | 10749594        | 0.80        | -36        | 16.6        | turq        | solute carrier family 38, member 10                                                    |
| Slc8a1                                  | NM_019268           | 10888110        | 1.62        | 52         | 5.7         | ylw         | solute carrier family 8 (sodium/calcium exchanger), member 1                           |
| Sod3                                    | NM_012880           | 10777108        | 0.74        | -110       | 16.7        | brwn        | superoxide dismutase 3, extracellular                                                  |
| Thtpa                                   | NM_001007682        | 10780278        | 0.80        | -29        | 22.7        | blue        | thiamine triphosphatase                                                                |
| Timm13                                  | NM_145781           | 10893680        | 0.77        | -41        | 19.2        | brwn        | translocase of inner mitochondrial membrane 13 homolog (yeast)                         |
| Tomm6                                   | ENSRNOT00000018959  | 10921444        | 0.80        | -59        | 15.4        | ylw         | translocase of outer mitochondrial membrane 6 homolog (yeast)                          |
| Trappc6a                                | NM_001109410        | 10704849        | 0.75        | -30        | 22.0        | ylw         | trafficking protein particle complex 6A                                                |
| Tst                                     | NM_012808           | 10905284        | 0.80        | -141       | 0           | grey        | thiosulfate sulfurtransferase                                                          |
| Uck2                                    | NM_001102408        | 10769621        | 0.80        | -36        | 0           | grey        | uridine-cytidine kinase 2                                                              |
| Vat1                                    | NM_001033683        | 10747633        | 0.70        | -98        | 4.0         | turq        | vesicle amine transport protein 1 homolog (T californica)                              |
| <b>PROTEOLYSIS</b>                      |                     |                 |             |            |             |             |                                                                                        |
| Adam1a                                  | NM_020078           | 10758697        | 1.49        | 20         | 4.85        | green       | a disintegrin and metallopeptidase domain 1a                                           |
| Adam4l1                                 | NM_001109277        | 10890962        | 1.74        | 58         | 6.81        | green       | a disintegrin and metallopeptidase domain 4-like 1                                     |
| Mcp2                                    | ENSRNOT00000027988  | 10780561        | 1.31        | 12         | 17.4        | turq        | mast cell protease 2                                                                   |
| <b>Mmp2</b>                             | <b>NM_031054</b>    | <b>10809540</b> | <b>0.83</b> | <b>-33</b> | <b>22.0</b> | <b>brwn</b> | <b>matrix metallopeptidase 2</b>                                                       |
| Npepo                                   | NM_001012346        | 10796991        | 1.37        | 17         | 0           | grey        | aminopeptidase O                                                                       |
| Osgpl1                                  | NM_001024787        | 10927792        | 1.20        | 11         | 0           | grey        | O-sialoglycoprotein endopeptidase-like 1                                               |
| Otub1                                   | NM_001106332        | 10728377        | 0.77        | -59        | 16.5        | blue        | OTU domain, ubiquitin aldehyde binding 1                                               |
| Psmc4                                   | NM_057122           | 10720135        | 0.83        | -89        | 11.9        | blue        | proteasome (prosome, macropain) 26S subunit, ATPase, 4                                 |
| Psmc4                                   | NM_001025140        | 10774830        | 1.28        | 351        | 0           | grey        | proteasome (prosome, macropain) activator subunit 4                                    |
| RGD1564425                              | ENSRNOT00000058238  | 10850081        | 0.78        | -12        | 1.2         | blue        | similar to Proteasome subunit beta type 3 (Proteasome theta chain)                     |
| Senp7                                   | NM_001105888        | 10753694        | 1.25        | 31         | 0           | grey        | SUMO1/sentrin specific peptidase 7                                                     |
| Spsb1                                   | NM_001107994        | 10881820        | 0.73        | -15        | 8.1         | brwn        | spla/ryanodine receptor domain and SOCS box containing 1                               |
| Tmprss2                                 | NM_130424           | 10753444        | 1.47        | 28         | 0           | grey        | transmembrane protease, serine 2                                                       |
| Usp15                                   | NM_145184           | 10902843        | 1.21        | 145        | 8.4         | turq        | ubiquitin specific peptidase 15                                                        |
| Usp33                                   | NM_001191094        | 10819790        | 1.25        | 86         | 0           | grey        | ubiquitin specific peptidase 33                                                        |
| Usp40                                   | NM_001134885        | 10929676        | 1.25        | 44         | 1.3         | ylw         | ubiquitin specific peptidase 40                                                        |
| Usp45                                   | NM_001107918        | 10867862        | 1.25        | 19         | 10.5        | brwn        | ubiquitin specific peptidase 45                                                        |
| Wnk1                                    | NM_053794           | 10865129        | 1.25        | 203        | 23.6        | ylw         | WNK lysine deficient protein kinase 1                                                  |
| Yme1l1                                  | NM_053682           | 10796800        | 1.20        | 336        | 5.9         | blue        | YME1-like 1 (S. cerevisiae)                                                            |
| <b>RECEPTORS &amp; BINDING PROTEINS</b> |                     |                 |             |            |             |             |                                                                                        |
| Abcg1                                   | NM_053502           | 10829082        | 0.68        | -24        | 20.0        | brwn        | ATP-binding cassette, sub-family G (WHITE), member 1                                   |
| Apbb3                                   | NM_053957           | 10803961        | 1.32        | 19         | 0           | grey        | amyloid beta (A4) precursor protein-binding, family B, member 3                        |
| Calb1                                   | NM_031984           | 10867731        | 1.43        | 11         | 0           | grey        | calbindin 1                                                                            |
| Fnbp4                                   | NM_001013159        | 10837688        | 1.49        | 39         | 1.2         | pink        | formin binding protein 4                                                               |
| Fzd6                                    | NM_001130536        | 10896256        | 1.30        | 26         | 5.0         | brwn        | frizzled homolog 6 (Drosophila)                                                        |
| Irfi30                                  | NM_001030026        | 10787491        | 0.81        | -61        | 0           | grey        | interferon gamma inducible protein 30                                                  |
| Irfngr1                                 | NM_053783           | 10701924        | 0.78        | -87        | 5.8         | brwn        | interferon gamma receptor 1                                                            |
| Lbp                                     | NM_017208           | 10841693        | 0.67        | -29        | 0           | grey        | lipopolysaccharide binding protein                                                     |
| Leng8                                   | NM_001037790        | 10719002        | 1.41        | 14         | 17.7        | ylw         | leukocyte receptor cluster (LRC) member 8                                              |
| Lifr                                    | NM_031048           | 10821741        | 1.23        | 11         | 0           | grey        | leukemia inhibitory factor receptor alpha                                              |
| Osbpl8                                  | BC168899            | 10895366        | 1.26        | 101        | 9.4         | blue        | oxysterol binding protein-like 8                                                       |
| Paqr7                                   | NM_001034081        | 10872808        | 0.72        | -91        | 25.5        | turq        | progesterin and adipoQ receptor family member VII                                      |
| Rtp4                                    | NM_001108321        | 10755088        | 0.70        | -22        | 0           | grey        | receptor (chemosensory) transporter protein 4                                          |
| <b>S100a6</b>                           | <b>NM_053485</b>    | <b>10817065</b> | <b>0.60</b> | <b>-54</b> | <b>44.8</b> | <b>ylw</b>  | <b>S100 calcium binding protein A6</b>                                                 |
| Tapbp                                   | NM_033098           | 10831762        | 0.71        | -61        | 17.1        | turq        | TAP binding protein                                                                    |
| Tax1bp3                                 | NM_001025419        | 10735662        | 0.82        | -60        | 0           | grey        | Tax1 (human T-cell leukemia virus type 1) binding protein 3                            |
| Tf                                      | NM_001013110        | 10919637        | 0.43        | -509       | 10.8        | brwn        | transferrin                                                                            |
| Tfrc                                    | NM_022712           | 10754785        | 1.39        | 126        | 11.7        | brwn        | transferrin receptor                                                                   |
| Tyrobp                                  | NM_212525           | 10705874        | 0.68        | -22        | 0           | grey        | Tyro protein tyrosine kinase binding protein                                           |
| Wbp4                                    | NM_053766           | 10785468        | 0.56        | -35        | 0           | grey        | WW domain binding protein 4 (formin binding protein 21)                                |
| <b>SIGNALING</b>                        |                     |                 |             |            |             |             |                                                                                        |
| Agbl3                                   | ENSRNOT00000032077  | 10854463        | 1.34        | 13         | 0           | grey        | ATP/GTP binding protein-like 3                                                         |
| Alcam                                   | NM_031753           | 10750878        | 1.38        | 113        | 0           | grey        | activated leukocyte cell adhesion molecule                                             |
| Alox5ap                                 | NM_017260           | 10759999        | 0.70        | -22        | 0           | grey        | arachidonate 5-lipoxygenase activating protein                                         |
| Alpk2                                   | ENSRNOT00000042352  | 10804935        | 0.75        | -10        | 0           | grey        | alpha-kinase 2                                                                         |
| Anxa2                                   | NM_019905           | 10911287        | 0.67        | -153       | 13.0        | brwn        | annexin A2                                                                             |
| Avpi1                                   | NM_134373           | 10715452        | 0.82        | -21        | 18.0        | brwn        | arginine vasopressin-induced 1                                                         |
| Cib1                                    | NM_031145           | 10723032        | 0.82        | -49        | 8.6         | brwn        | calcium and integrin binding 1 (calmyrin)                                              |
| Csk                                     | NM_001030039        | 10917795        | 0.81        | -23        | 8.6         | turq        | c-src tyrosine kinase                                                                  |
| Defb1                                   | NM_031810           | 10792530        | 1.25        | 18         | 0           | grey        | defensin beta 1                                                                        |

|                      |                     |                 |             |            |             |             |                                                             |
|----------------------|---------------------|-----------------|-------------|------------|-------------|-------------|-------------------------------------------------------------|
| Dennd4b              | ENSRNOT00000049810  | 10816980        | 1.29        | 14         | 20.2        | ylw         | DENN/MADD domain containing 4B                              |
| Ehd2                 | NM_001024897        | 10719204        | 0.69        | -33        | 14.0        | brwn        | EH-domain containing 2                                      |
| Eid2                 | ENSRNOT00000026114  | 10705507        | 0.64        | -33        | 5.1         | brwn        | EP300 interacting inhibitor of differentiation 2            |
| FrmD8                | NM_001008348        | 10728030        | 0.81        | -16        | 18.0        | turq        | FERM domain containing 8                                    |
| Garnl1               | NM_020083           | 10890031        | 1.30        | 97         | 0           | grey        | GTPase activating Rap/RanGAP domain-like 1                  |
| Gchfr                | NM_133595           | 10838772        | 0.79        | -14        | 3.9         | ylw         | GTP cyclohydrolase I feedback regulator                     |
| Gna12                | NM_031034           | 10756899        | 0.82        | -70        | 0           | grey        | guanine nucleotide binding protein, alpha 12                |
| <b>Gpr146</b>        | <b>NM_001109062</b> | <b>10760663</b> | <b>0.82</b> | <b>-35</b> | <b>25.5</b> | <b>brwn</b> | <b>G protein-coupled receptor 146</b>                       |
| Gpr160               | NM_001025147        | 10822663        | 1.38        | 52         | 0           | grey        | G protein-coupled receptor 160                              |
| Gpr21                | NM_001109554        | 10835940        | 1.54        | 13         | 0           | grey        | G protein-coupled receptor 21                               |
| Grk4                 | NM_022928           | 10777639        | 1.31        | 16         | 4.0         | ylw         | G protein-coupled receptor kinase 4                         |
| Insig1               | NM_022392           | 10861986        | 0.71        | -278       | 18.9        | turq        | insulin induced gene 1                                      |
| Lcn2                 | NM_130741           | 10844331        | 0.58        | -50        | 0           | grey        | lipocalin 2                                                 |
| Map3k3               | NM_001107058        | 10739099        | 0.82        | -20        | 5.3         | brwn        | mitogen activated protein kinase kinase kinase 3            |
| Map4k4               | NM_001106904        | 10922783        | 0.81        | -26        | 0           | grey        | mitogen-activated protein kinase kinase kinase kinase 4     |
| Mknk2                | NM_001011985        | 10893744        | 0.78        | -114       | 13.8        | turq        | MAP kinase-interacting serine/threonine kinase 2            |
| Nek6                 | NM_182953           | 10835964        | 0.77        | -16        | 5.3         | brwn        | NIMA (never in mitosis gene a)-related kinase 6             |
| Pdp1                 | NM_0019372          | 10875532        | 1.21        | 29         | 14.1        | turq        | pyruvate dehydrogenase phosphatase catalytic subunit 1      |
| Plekha5              | AF468695            | 10859438        | 1.24        | 26         | 0           | grey        | pleckstrin homology domain containing, family A member 5    |
| Plekho2              | ENSRNOT00000042633  | 10918288        | 0.81        | -17        | 8.8         | brwn        | pleckstrin homology domain containing, family O member 2    |
| Prkx                 | NM_001033963        | 10938101        | 0.83        | -21        | 16.0        | turq        | protein kinase, X-linked                                    |
| Pskh1                | NM_001108897        | 10807430        | 0.76        | -17        | 15.0        | turq        | protein serine kinase H1                                    |
| Rab23                | NM_001109005        | 10922279        | 1.24        | 29         | 3.2         | brwn        | RAB23, member RAS oncogene family                           |
| Rab32                | NM_001108902        | 10716785        | 0.81        | -10        | 14.2        | brwn        | RAB32, member RAS oncogene family                           |
| Rab43                | NM_001024331        | 10863851        | 0.63        | -22        | 14.9        | brwn        | RAB43, member RAS oncogene family                           |
| <b>RabggtA</b>       | <b>NM_031654</b>    | <b>10783898</b> | <b>0.83</b> | <b>-19</b> | <b>47.0</b> | <b>turq</b> | <b>Rab geranylgeranyltransferase, alpha subunit</b>         |
| RabggtB              | NM_138708           | 10827438        | 1.21        | 61         | 0.5         | pink        | Rab geranylgeranyltransferase, beta subunit                 |
| Snx14                | NM_001108174        | 10919187        | 1.32        | 94         | 0           | grey        | sorting nexin 14                                            |
| Stk36                | NM_001173986        | 10924363        | 1.33        | 13         | 15.0        | blue        | serine/threonine kinase 36 (fused homolog, Drosophila)      |
| Tinagl1              | NM_053582           | 10880074        | 0.65        | -40        | 4.2         | brwn        | tubulointerstitial nephritis antigen-like 1                 |
| <b>TRANSCRIPTION</b> |                     |                 |             |            |             |             |                                                             |
| Asb1                 | NM_001108232        | 10925443        | 1.36        | 26         | 0           | grey        | ankyrin repeat and SOCS box-containing 1                    |
| Bcl6                 | NM_001107084        | 10751931        | 0.52        | -44        | 0           | grey        | B-cell CLL/lymphoma 6                                       |
| Bcl7c                | NM_001106298        | 10726045        | 0.79        | -34        | 0           | grey        | B-cell CLL/lymphoma 7C                                      |
| Bclaf1               | NM_001047852        | 10701990        | 1.26        | 18         | 5.1         | blue        | BCL2-associated transcription factor 1                      |
| Bhlhb9               | NM_207611           | 10935025        | 1.38        | 22         | 0           | grey        | basic helix-loop-helix domain containing, class B, 9        |
| Bmyc                 | NM_001013163        | 10834360        | 0.76        | -28        | 16.3        | turq        | brain expressed myelocytomatosis oncogene                   |
| Casc5                | ENSRNOT00000067081  | 10838743        | 0.75        | -16        | 10.5        | blue        | cancer susceptibility candidate 5                           |
| Ccdc17               | NM_001014067        | 10871262        | 1.31        | 11         | 0.4         | pink        | coiled-coil domain containing 17                            |
| Ccdc62               | NM_001134766        | 10761792        | 1.25        | 13         | 0           | grey        | coiled-coil domain containing 62                            |
| Cebpa                | NM_012524           | 10706131        | 0.78        | -14        | 7.6         | brwn        | CCAAT/enhancer binding protein (C/EBP), alpha               |
| <b>Ddx17</b>         | <b>NM_001015018</b> | <b>10897683</b> | <b>1.40</b> | <b>225</b> | <b>1.4</b>  | <b>pink</b> | <b>DEAD (Asp-Glu-Ala-Asp) box polypeptide 17</b>            |
| <b>Dnajc16</b>       | <b>NM_001014194</b> | <b>10881178</b> | <b>0.83</b> | <b>-25</b> | <b>45.7</b> | <b>turq</b> | <b>DnaJ (Hsp40) homolog, subfamily C, member 16</b>         |
| Dnajc30              | NM_001109024        | 10761225        | 0.65        | -49        | 5.9         | turq        | DnaJ (Hsp40) homolog, subfamily C, member 30                |
| Eid3                 | NM_001044304        | 10901436        | 1.46        | 25         | 0           | grey        | EP300 interacting inhibitor of differentiation 3            |
| Fbxo15               | NM_001108436        | 10803025        | 1.36        | 12         | 16.3        | turq        | F-box protein 15                                            |
| Fbxo6                | NM_138917           | 10881583        | 0.79        | -75        | 16.4        | blue        | F-box protein 6                                             |
| <b>Hes6</b>          | <b>NM_001013179</b> | <b>10929835</b> | <b>0.81</b> | <b>-19</b> | <b>22.3</b> | <b>brwn</b> | <b>hairy and enhancer of split 6 (Drosophila)</b>           |
| Id1                  | NM_012797           | 10840890        | 0.66        | -19        | 3.1         | brwn        | inhibitor of DNA binding 1                                  |
| Ino80                | ENSRNOT00000068584  | 10848539        | 1.23        | 34         | 4.5         | brwn        | INO80 homolog (S. cerevisiae)                               |
| Ino80b               | NM_001048233        | 10863496        | 0.82        | -11        | 0           | grey        | INO80 complex subunit B                                     |
| Klhl18               | ENSRNOT00000056141  | 10920449        | 0.75        | -17        | 0           | grey        | kelch-like 18 (Drosophila)                                  |
| LOC679823            | ENSRNOT00000004434  | 10731732        | 0.83        | -40        | 20.6        | brwn        | similar to 60S ribosomal protein L37a                       |
| LOC681004            | ENSRNOT00000002800  | 10753109        | 1.48        | 77         | 10.1        | blue        | similar to GC-rich sequence DNA-binding factor homolog      |
| Lxn                  | NM_031655           | 10823548        | 0.73        | -18        | 3.29        | green       | latexin                                                     |
| Lztr1                | NM_001108326        | 10755705        | 0.81        | -35        | 11.1        | brwn        | leucine-zipper-like transcription regulator 1               |
| <b>Mcrs1</b>         | <b>NM_001013106</b> | <b>10907092</b> | <b>0.78</b> | <b>-22</b> | <b>24.7</b> | <b>brwn</b> | <b>microspherule protein 1</b>                              |
| <b>Mdm4</b>          | <b>NM_001012026</b> | <b>10767663</b> | <b>1.49</b> | <b>145</b> | <b>25.1</b> | <b>blue</b> | <b>Mdm4 p53 binding protein homolog (mouse)</b>             |
| Med20                | NM_001013178        | 10926323        | 1.28        | 26         | 0           | grey        | mediator complex subunit 20                                 |
| Morc3                | NM_001107109        | 10750373        | 1.25        | 50         | 27.2        | turq        | MORC family CW-type zinc finger 3                           |
| Mtvr2                | NM_001015013        | 10727999        | 0.76        | -45        | 17.1        | brwn        | mammary tumor virus receptor 2                              |
| Nbl1                 | NM_031609           | 10882391        | 0.74        | -22        | 4.6         | brwn        | neuroblastoma, suppression of tumorigenicity 1              |
| Nfxl1                | NM_001170438        | 10772476        | 1.23        | 42         | 10.4        | blue        | nuclear transcription factor, X-box binding-like 1          |
| Nudt3                | NM_001024243        | 10831868        | 0.81        | -59        | 0           | grey        | nudix (nucleoside diphosphate linked moiety X)-type motif 3 |
| Nudt4                | NM_053598           | 10902003        | 1.21        | 220        | 0           | grey        | nudix (nucleoside diphosphate linked moiety X)-type motif 4 |
| Nxf1                 | NM_021579           | 10713626        | 1.42        | 193        | 20.6        | ylw         | nuclear RNA export factor 1                                 |
| Poli                 | NM_001106137        | 10805111        | 1.29        | 20         | 11.0        | brwn        | polymerase (DNA directed), iota                             |
| Polr2h               | NM_001134789        | 10755309        | 1.26        | 43         | 0           | grey        | polymerase (RNA) II (DNA directed) polypeptide H            |
| Polr2i               | NM_001106244        | 10720605        | 0.77        | -35        | 2.3         | blue        | polymerase (RNA) II (DNA directed) polypeptide I            |

|                                               |                     |                 |             |             |             |             |                                                                       |
|-----------------------------------------------|---------------------|-----------------|-------------|-------------|-------------|-------------|-----------------------------------------------------------------------|
| Ppargc1b                                      | NM_176075           | 10804678        | 0.79        | -18         | 4.9         | brwn        | peroxisome proliferator-activated receptor gamma, coactivator 1 beta  |
| Preb                                          | NM_001170708        | 10883200        | 0.81        | -62         | 17.0        | brwn        | prolactin regulatory element binding                                  |
| Rb1cc1                                        | NM_001107901        | 10875183        | 1.32        | 165         | 0           | grey        | RB1-inducible coiled-coil 1                                           |
| RGD1306520                                    | NM_001127485        | 10818230        | 1.36        | 58          | 10.9        | turq        | similar to receptor-interacting factor 1                              |
| Rictor                                        | ENSRNOT00000029565  | 10813407        | 1.35        | 54          | 0           | grey        | RPTOR independent companion of MTOR, complex 2                        |
| Rras                                          | NM_001108481        | 10706705        | 0.79        | -52         | 0           | grey        | Harvey rat sarcoma virus oncogene, subgroup R                         |
| <b>Scand1</b>                                 | <b>NM_001108599</b> | <b>10851192</b> | <b>0.81</b> | <b>-130</b> | <b>43.9</b> | <b>blue</b> | <b>SCAN domain-containing 1</b>                                       |
| Son                                           | NM_001170327        | 10750219        | 1.24        | 147         | 9.0         | blue        | Son DNA binding protein (chr11)                                       |
| Son                                           | NM_001170327        | 10875322        | 1.25        | 166         | 15.6        | blue        | Son DNA binding protein (chr5)                                        |
| Stx16                                         | NM_001108610        | 10842635        | 1.30        | 38          | 14.5        | turq        | syntaxin 16                                                           |
| Tada2b                                        | NM_001170455        | 10773358        | 0.81        | -30         | 28.4        | turq        | transcriptional adaptor 2 (ADA2 homolog, yeast)-beta                  |
| Thoc1                                         | NM_001047850        | 10800098        | 1.26        | 56          | 4.2         | turq        | THO complex 1                                                         |
| Tsc22d3                                       | NM_031345           | 10939516        | 0.65        | -75         | 0           | grey        | TSC22 domain family, member 3                                         |
| Zbed4                                         | NM_001134800        | 10898454        | 0.80        | -20         | 0           | grey        | zinc finger, BED-type containing 4                                    |
| Zcchc2                                        | BC100090            | 10763284        | 1.25        | 45          | 0           | grey        | zinc finger, CCHC domain containing 2                                 |
| Zfp187                                        | ENSRNOT00000024693  | 10795319        | 1.39        | 40          | 2.6         | blue        | zinc finger protein 187                                               |
| Zfp317                                        | NM_001134634        | 10908182        | 1.29        | 29          | 0           | grey        | zinc finger protein 317                                               |
| Zfp36                                         | NM_133290           | 10720215        | 0.63        | -63         | 10.7        | turq        | zinc finger protein 36                                                |
| Zfp385d                                       | NM_001013992        | 10782437        | 1.24        | 13          | 8.7         | brwn        | zinc finger protein 385D                                              |
| Zfp451                                        | NM_001033705        | 10927233        | 1.27        | 33          | 0           | grey        | zinc finger protein 451                                               |
| Zmym4                                         | NM_001107982        | 10879879        | 1.26        | 43          | 19.8        | ylw         | zinc finger, MYM-type 4                                               |
| Zmym6                                         | NM_001108681        | 10872114        | 1.29        | 32          | 0.6         | ylw         | zinc finger, MYM-type 6                                               |
| Znf292                                        | NM_001008879        | 10875941        | 1.33        | 75          | 1.5         | blue        | zinc finger protein 292                                               |
| Zranb2                                        | NM_031616           | 10819890        | 1.34        | 121         | 1.3         | pink        | zinc finger, RAN-binding domain containing 2                          |
| Zswim5                                        | NM_001107963        | 10871339        | 0.82        | -18         | 0           | grey        | zinc finger, SWIM domain containing 5                                 |
| <b>TRANSLATION &amp; PROTEIN MODIFICATION</b> |                     |                 |             |             |             |             |                                                                       |
| Cpsf7                                         | NM_001014245        | 10713894        | 1.29        | 19          | 0           | grey        | cleavage and polyadenylation specific factor 7, 59kDa                 |
| Eef1g                                         | NM_001004223        | 10713789        | 0.78        | -228        | 19.2        | blue        | eukaryotic translation elongation factor 1 gamma                      |
| Eif1ad                                        | NM_001008305        | 10713033        | 0.82        | -19         | 5.9         | brwn        | eukaryotic translation initiation factor 1A domain containing         |
| Eif3g                                         | NM_001013095        | 10915427        | 0.81        | -81         | 16.7        | brwn        | eukaryotic translation initiation factor 3, subunit G                 |
| Eif3h                                         | NM_198751           | 10903684        | 0.77        | -71         | 10.9        | blue        | eukaryotic translation initiation factor 3, subunit H                 |
| Eif6                                          | NM_001037352        | 10778386        | 0.80        | -45         | 8.5         | turq        | eukaryotic translation initiation factor 6                            |
| Hnrph1                                        | NM_080896           | 10733243        | 1.28        | 271         | 0.8         | pink        | heterogeneous nuclear ribonucleoprotein H1                            |
| Lsm7                                          | NM_001108732        | 10893684        | 0.82        | -10         | 2.9         | blue        | LSM7 homolog, U6 small nuclear RNA associated (S. cerevisiae)         |
| Luc7l2                                        | NM_001107853        | 10854626        | 1.25        | 151         | 3.0         | blue        | LUC7-like 2 (S. cerevisiae)                                           |
| Mrpl23                                        | NM_022529           | 10712501        | 0.79        | -97         | 10.8        | blue        | mitochondrial ribosomal protein L23                                   |
| Mrpl34                                        | NM_001006965        | 10787281        | 0.83        | -21         | 16.4        | blue        | mitochondrial ribosomal protein L34                                   |
| Mrpl38                                        | NM_001009369        | 10749132        | 0.73        | -41         | 0           | grey        | mitochondrial ribosomal protein L38                                   |
| Mrt04                                         | NM_001106697        | 10880913        | 0.79        | -29         | 15.9        | brwn        | mRNA turnover 4 homolog (S. cerevisiae)                               |
| Parp3                                         | NM_001008328        | 10919928        | 0.81        | -25         | 0           | grey        | poly (ADP-ribose) polymerase family, member 3                         |
| Pcbp3                                         | NM_001011945        | 10829418        | 1.32        | 28          | 6.0         | ylw         | poly(rC) binding protein 3                                            |
| Pnn                                           | NM_001109023        | 10884740        | 1.27        | 103         | 17.3        | blue        | pinin, desmosome associated protein                                   |
| Polr1b                                        | NM_031773           | 10839751        | 0.83        | -16         | 6.0         | turq        | polymerase (RNA) I polypeptide B                                      |
| Polr1c                                        | NM_001008330        | 10921741        | 0.83        | -13         | 16.6        | blue        | polymerase (RNA) I polypeptide C                                      |
| Pop7                                          | NM_001105918        | 10760952        | 0.77        | -28         | 20.6        | brwn        | processing of precursor 7, ribonuclease P/MRP subunit (S. cerevisiae) |
| Prpf4b                                        | NM_001011923        | 10798074        | 1.41        | 84          | 1.2         | pink        | PRP4 pre-mRNA processing factor 4 homolog B (yeast)                   |
| Rbm25                                         | NM_001108984        | 10731611        | 1.28        | 170         | 10.6        | blue        | RNA binding motif protein 25                                          |
| <b>Rbm39</b>                                  | <b>NM_001013207</b> | <b>10851173</b> | <b>1.27</b> | <b>330</b>  | <b>1.4</b>  | <b>pink</b> | <b>RNA binding motif protein 39</b>                                   |
| RGD1561841                                    | ENSRNOT00000042248  | 10823044        | 1.46        | 10          | 0           | grey        | similar to ribosomal protein L31                                      |
| Rnh1                                          | NM_139105           | 10726726        | 0.82        | -39         | 20.6        | blue        | ribonuclease/angiogenin inhibitor 1                                   |
| Rnmt                                          | NM_001008299        | 10805052        | 1.21        | 43          | 3.7         | brwn        | RNA (guanine-7-) methyltransferase                                    |
| Rpl13                                         | NM_031101           | 10733688        | 0.82        | -166        | 39.7        | ylw         | ribosomal protein L13 (chr10)                                         |
| Rpl13                                         | NM_031101           | 10777032        | 0.81        | -236        | 38.0        | ylw         | ribosomal protein L13 (chr14)                                         |
| Rpl13                                         | NM_031101           | 10808595        | 0.79        | -243        | 38.6        | ylw         | ribosomal protein L13 (chr19)                                         |
| Rpl13                                         | NM_031101           | 10914849        | 0.82        | -179        | 37.7        | ylw         | ribosomal protein L13 (chr8)                                          |
| Rpl13                                         | ENSRNOT00000020635  | 10883459        | 0.82        | -265        | 32.9        | ylw         | ribosomal protein L13 (chr6)                                          |
| <b>Rpl7a</b>                                  | <b>NM_001114391</b> | <b>10753737</b> | <b>1.78</b> | <b>53</b>   | <b>28.9</b> | <b>blue</b> | <b>ribosomal protein L7a (chr11)</b>                                  |
| <b>Rpl7a</b>                                  | <b>NM_001114391</b> | <b>10797321</b> | <b>1.63</b> | <b>43</b>   | <b>32.1</b> | <b>blue</b> | <b>ribosomal protein L7a (chr17)</b>                                  |
| Rps12                                         | NM_031709           | 10702286        | 0.82        | -92         | 22.7        | ylw         | ribosomal protein S12 (chr1)                                          |
| Rps12                                         | NM_031709           | 10807514        | 0.80        | -158        | 19.1        | ylw         | ribosomal protein S12 (chr19)                                         |
| Rps12                                         | NM_031709           | 10839876        | 0.79        | -209        | 16.7        | ylw         | ribosomal protein S12 (chr3)                                          |
| Rps15                                         | NM_017151           | 10900533        | 0.77        | -142        | 37.5        | ylw         | ribosomal protein S15                                                 |
| <b>Rps21</b>                                  | <b>NM_031111</b>    | <b>10842805</b> | <b>0.83</b> | <b>-231</b> | <b>55.9</b> | <b>ylw</b>  | <b>ribosomal protein S21 (chr3)</b>                                   |
| <b>Rps21</b>                                  | <b>NM_031111</b>    | <b>10938962</b> | <b>0.82</b> | <b>-194</b> | <b>49.4</b> | <b>ylw</b>  | <b>ribosomal protein S21 (chrX)</b>                                   |
| Sf3b5                                         | NM_001126092        | 10701797        | 0.81        | -30         | 11.9        | ylw         | splicing factor 3b, subunit 5                                         |
| Sfrs18                                        | NM_001025274        | 10867882        | 1.63        | 109         | 18.7        | blue        | splicing factor, arginine/serine-rich 18                              |
| Sfrs5                                         | NM_001195505        | 10885672        | 1.56        | 445         | 1.2         | pink        | splicing factor, arginine/serine-rich 5                               |
| Sfrs6                                         | NM_001014185        | 10841912        | 1.26        | 86          | 0           | grey        | splicing factor, arginine/serine-rich 6                               |
| Snrnp70                                       | NM_001108483        | 10721802        | 1.26        | 99          | 1.1         | pink        | small nuclear ribonucleoprotein 70 (U1)                               |

|                                    |                           |                 |             |             |             |             |                                                                         |
|------------------------------------|---------------------------|-----------------|-------------|-------------|-------------|-------------|-------------------------------------------------------------------------|
| Srrm2                              | ENSRNOT00000006370        | 10731980        | 1.32        | 131         | 6.4         | ylw         | serine/arginine repetitive matrix 2                                     |
| Yars                               | NM_001025696              | 10872291        | 0.79        | -75         | 21.3        | turq        | tyrosyl-tRNA synthetase                                                 |
| <b>MISCELLANEOUS &amp; UNKNOWN</b> |                           |                 |             |             |             |             |                                                                         |
| Cuedc2                             | NM_001079886              | 10730559        | 0.82        | -12         | 3.4         | brwn        | CUE domain containing 2                                                 |
| Fam108a1                           | NM_001006983              | 10893768        | 0.76        | -38         | 11.2        | blue        | family with sequence similarity 108, member A1                          |
| Fam129a                            | NM_022242                 | 10764661        | 0.50        | -80         | 0           | grey        | family with sequence similarity 129, member A                           |
| Fam164c                            | NM_001014079              | 10886023        | 0.79        | -16         | 0           | grey        | family with sequence similarity 164, member C                           |
| Fam175b                            | NM_001106307              | 10711723        | 1.21        | 86          | 23.4        | blue        | family with sequence similarity 175, member B                           |
| Fam46a                             | NM_001106844              | 10919041        | 0.77        | -39         | 11.2        | blue        | family with sequence similarity 46, member A                            |
| Fam48a                             | NM_001014170              | 10815393        | 1.43        | 124         | 21.0        | blue        | family with sequence similarity 48, member A                            |
| LOC100359595                       | ENSRNOT00000001051        | 10833422        | 1.28        | 25          | 5.1         | turq        | hypothetical protein LOC100359595                                       |
| LOC100360120                       | ENSRNOT00000055732        | 10859203        | 0.77        | -82         | 0           | grey        | hypothetical protein LOC100360120                                       |
| LOC100360664                       | ENSRNOT00000024010        | 10926433        | 0.78        | -22         | 14.2        | blue        | rCG43434-like                                                           |
| LOC100362431                       | ENSRNOT00000013565        | 10846299        | 0.83        | -12         | 3.3         | blue        | tetratricopeptide repeat domain 30B                                     |
| LOC100364734                       | ENSRNOT00000017292        | 10747177        | 1.24        | 15          | 0           | grey        | hypothetical protein LOC100364734                                       |
| LOC290577                          | ENSRNOT00000060770        | 10786995        | 1.22        | 136         | 14.0        | blue        | hypothetical LOC290577                                                  |
| LOC310721                          | BC083570                  | 10825403        | 1.44        | 125         | 3.4         | blue        | similar to 4930431B09Rik protein                                        |
| LOC366763                          | ENSRNOT00000063789        | 10892616        | 0.64        | -13         | 9.2         | blue        | rCG63169-like                                                           |
| LOC500300                          | NM_001024334              | 10858160        | 0.71        | -18         | 0           | grey        | similar to hypothetical protein MGC6835                                 |
| LOC500392                          | NM_001024340              | 10875102        | 1.32        | 12          | 0           | grey        | similar to hypothetical protein FLJ25692                                |
| LOC685634                          | ENSRNOT00000019224        | 10872155        | 0.72        | -39         | 11.6        | brwn        | hypothetical protein LOC685634                                          |
| <b>LOC688452</b>                   | <b>FM212919</b>           | <b>10703432</b> | <b>1.74</b> | <b>39</b>   | <b>21.0</b> | <b>brwn</b> | <b>hypothetical protein LOC688452</b>                                   |
| LOC688786                          | NM_001195245              | 10759636        | 0.79        | -61         | 6.0         | ylw         | similar to CG14483-PA                                                   |
| <b>MGC93975</b>                    | <b>BC079041</b>           | <b>10721350</b> | <b>0.74</b> | <b>-121</b> | <b>42.4</b> | <b>turq</b> | <b>similar to 2310044H10Rik protein</b>                                 |
| Oxr1                               | NM_001197907              | 10896353        | 1.23        | 185         | 0           | grey        | oxidation resistance 1                                                  |
| RGD1304728                         | ENSRNOT00000018808        | 10744663        | 1.25        | 17          | 0           | grey        | similar to 4933427D14Rik protein                                        |
| RGD1305689                         | NM_001008297              | 10789740        | 0.79        | -84         | 0           | grey        | similar to DNA segment, Chr 14, ERATO Doi 449, expressed                |
| RGD1307067                         | BC161971                  | 10893974        | 0.81        | -34         | 19.4        | turq        | LOC362840                                                               |
| RGD1308059                         | BC091300                  | 10869656        | 0.72        | -18         | 6.8         | brwn        | similar to DNA segment, Chr 4, Brigham & Womens Genetics 0951 expressed |
| RGD1308297                         | BC082039                  | 10785745        | 1.31        | 80          | 0           | grey        | similar to CG10084-PA                                                   |
| RGD1311899                         | BC088751                  | 10762735        | 0.82        | -12         | 0           | grey        | similar to RIKEN cDNA 2210016L21 gene                                   |
| RGD1560909                         | BC158750                  | 10922771        | 0.78        | -41         | 23.9        | turq        | similar to DNA segment, Chr 1, Brigham & Womens Genetics 0212 expressed |
| RGD1561878                         | ENSRNOT00000045241        | 10841033        | 1.25        | 28          | 5.6         | blue        | similar to mKIAA0978 protein                                            |
| RGD1562079                         | NM_001177687              | 10720557        | 0.76        | -26         | 7.9         | blue        | RGD1562079                                                              |
| RGD1565059                         | NM_001127562              | 10823456        | 1.31        | 16          | 0           | grey        | similar to hypothetical protein E130311K13                              |
| RGD1565192                         | NM_001134639              | 10777034        | 0.74        | -13         | 16.3        | blue        | similar to 1810013D10Rik protein                                        |
| Sdccag1                            | NM_001170586              | 10719956        | 1.39        | 80          | 2.9         | blue        | serologically defined colon cancer antigen 1                            |
| Tdrd3                              | NM_001012043              | 10781752        | 1.25        | 54          | 18.0        | turq        | tudor domain containing 3                                               |
| <b>Tmem134</b>                     | <b>NM_001078647</b>       | <b>10712816</b> | <b>0.79</b> | <b>-152</b> | <b>29.7</b> | <b>blue</b> | <b>transmembrane protein 134</b>                                        |
| <b>Tmem147</b>                     | <b>NM_001038494</b>       | <b>10720767</b> | <b>0.77</b> | <b>-48</b>  | <b>28.1</b> | <b>brwn</b> | <b>transmembrane protein 147</b>                                        |
| Tmem160                            | NM_001106227              | 10704482        | 0.83        | -40         | 19.0        | blue        | transmembrane protein 160                                               |
| Tmem161b                           | ENSRNOT00000050072        | 10820232        | 1.26        | 132         | 5.4         | brwn        | transmembrane protein 161B                                              |
| Tmem176a                           | NM_001039008              | 10855416        | 0.69        | -100        | 2.7         | brwn        | transmembrane protein 176A                                              |
| Tmem20                             | NM_001191635              | 10715149        | 1.22        | 12          | 0           | grey        | transmembrane protein 20                                                |
| Tmem223                            | NM_001191104              | 10713648        | 0.81        | -53         | 26.6        | ylw         | transmembrane protein 223                                               |
| Tmem38b                            | NM_001014191              | 10869151        | 0.78        | -66         | 4.6         | blue        | transmembrane protein 38B                                               |
| Tmem86b                            | NM_001109604              | 10704014        | 1.46        | 44          | 5.52        | green       | transmembrane protein 86B                                               |
| Tmem88                             | NM_001128155              | 10743961        | 0.75        | -14         | 4.1         | brwn        | transmembrane protein 88                                                |
| Tmtc3                              | NM_001135858              | 10902024        | 1.24        | 70          | 13.9        | blue        | transmembrane and tetratricopeptide repeat containing 3                 |
| <b>EST's</b>                       |                           |                 |             |             |             |             |                                                                         |
| LOC691286                          | NM_001109634              | 10742913        | 1.33        | 13          | 4.84        | green       | similar to RIKEN cDNA 4930504O13                                        |
| MGC72612                           | NM_001009538              | 10787710        | 1.21        | 28          | 10.1        | turq        | similar to expressed sequence AI449175                                  |
| Mir218-1                           | NR_031931                 | 10777176        | 2.46        | 14          | 0           | grey        | microRNA mir-218-1                                                      |
| Mir339                             | NR_031784                 | 10757098        | 1.47        | 22          | 2.4         | blue        | microRNA mir-339                                                        |
| Mir341                             | rno-mir-341               | 10886842        | 1.47        | 18          | 0           | grey        | rno-mir-341                                                             |
| Mir346                             | NR_031790                 | 10787029        | 1.30        | 20          | 9.5         | blue        | microRNA mir-346                                                        |
| Mir598                             | NR_032286                 | 10781012        | 1.34        | 33          | 0           | grey        | microRNA mir-598                                                        |
| Mir667                             | NR_032764                 | 10887072        | 1.25        | 18          | 0           | grey        | microRNA mir-667                                                        |
| RGD1304587                         | NM_001100551              | 10733958        | 0.81        | -34         | 1.9         | blue        | similar to RIKEN cDNA 2310033P09                                        |
| RGD1305587                         | BC158618                  | 10833144        | 0.78        | -75         | 16.8        | brwn        | similar to RIKEN cDNA 2010107G23                                        |
| RGD1306058                         | NM_001134572              | 10794353        | 0.80        | -18         | 4.4         | ylw         | similar to RIKEN cDNA 1110007C09                                        |
| RGD1307934                         | ENSRNOT00000031133        | 10730287        | 1.33        | 34          | 14.7        | brwn        | similar to DNA segment, Chr 19, ERATO Doi 386, expressed                |
| RGD1310553                         | NM_001008517              | 10922951        | 1.44        | 33          | 0           | grey        | similar to expressed sequence AI597479                                  |
| RGD1311078                         | BC168942                  | 10739781        | 0.78        | -20         | 3.7         | brwn        | LOC360664                                                               |
| <b>RGD1311660</b>                  | <b>NM_001163320</b>       | <b>10760677</b> | <b>0.78</b> | <b>-77</b>  | <b>39.0</b> | <b>brwn</b> | <b>similar to RIKEN cDNA 1110007L15</b>                                 |
| <b>RGD1359127</b>                  | <b>ENSRNOT00000021939</b> | <b>10893896</b> | <b>0.81</b> | <b>-11</b>  | <b>31.3</b> | <b>brwn</b> | <b>similar to RIKEN cDNA 2310011J03</b>                                 |
| RGD1560258                         | NM_001134570              | 10761380        | 1.35        | 48          | 2.68        | green       | similar to RIKEN cDNA 4930579G22                                        |
| RGD1561557                         | NM_001108929              | 10829351        | 1.29        | 14          | 24.4        | blue        | similar to chromosome 21 open reading frame 29                          |
| RGD1564067                         | NM_001166303              | 10830906        | 1.33        | 16          | 0           | grey        | similar to RIKEN cDNA 1700022C21                                        |

|            |                           |                 |             |             |             |             |            |
|------------|---------------------------|-----------------|-------------|-------------|-------------|-------------|------------|
| RGD1565616 | NM_001109206              | 10849967        | 1.27        | 54          | 17.3        | brwn        | RGD1565616 |
|            | Y09171                    | 10780173        | 0.74        | -118        | 7.1         | ylw         |            |
|            | U15425                    | 10701862        | 0.69        | -23         | 0           | grey        |            |
|            | NC_001665                 | 10930560        | 1.36        | 549         | 13.8        | turq        |            |
|            | J05014                    | 10876313        | 0.76        | -546        | 18.2        | ylw         |            |
|            | GENSCAN00000039363        | 10727226        | 1.34        | 20          | 0           | grey        |            |
|            | GENSCAN00000037350        | 10701986        | 1.61        | 16          | 0           | grey        |            |
|            | GENSCAN00000035572        | 10859857        | 1.69        | 29          | 11.9        | blue        |            |
|            | GENSCAN00000021698        | 10830199        | 1.55        | 11          | 0           | grey        |            |
|            | GENSCAN00000021509        | 10878967        | 0.72        | -31         | 18.8        | ylw         |            |
|            | GENSCAN00000006482        | 10934827        | 1.95        | 16          | 24.5        | blue        |            |
|            | <b>FQ231323</b>           | <b>10931346</b> | <b>0.80</b> | <b>-66</b>  | <b>37.2</b> | <b>brwn</b> |            |
|            | FQ231232                  | 10881468        | 1.38        | 114         | 0           | grey        |            |
|            | FQ230857                  | 10769908        | 0.69        | -89         | 0.4         | pink        |            |
|            | FQ230643                  | 10930984        | 1.22        | 18          | 0           | grey        |            |
|            | <b>FQ229993</b>           | <b>10737194</b> | <b>0.69</b> | <b>-170</b> | <b>44.9</b> | <b>ylw</b>  |            |
|            | <b>FQ228798</b>           | <b>10931010</b> | <b>0.81</b> | <b>-114</b> | <b>23.9</b> | <b>brwn</b> |            |
|            | FQ227960                  | 10890297        | 1.46        | 10          | 0           | grey        |            |
|            | FQ224565                  | 10931577        | 1.28        | 68          | 0           | grey        |            |
|            | FQ223177                  | 10926091        | 1.32        | 144         | 0           | grey        |            |
|            | FQ218314                  | 10892515        | 0.72        | -11         | 10.9        | blue        |            |
|            | FQ213782                  | 10866535        | 0.76        | -12         | 0           | grey        |            |
|            | FQ211569                  | 10787706        | 1.35        | 87          | 10.5        | blue        |            |
|            | ENSRNOT00000070527        | 10771730        | 1.47        | 12          | 0           | grey        |            |
|            | ENSRNOT00000070494        | 10852413        | 0.71        | -10         | 18.4        | blue        |            |
|            | <b>ENSRNOT00000070461</b> | <b>10837686</b> | <b>0.72</b> | <b>-10</b>  | <b>52.5</b> | <b>blue</b> |            |
|            | ENSRNOT00000070202        | 10834604        | 0.58        | -36         | 18.4        | ylw         |            |
|            | <b>ENSRNOT00000070005</b> | <b>10855976</b> | <b>0.70</b> | <b>-12</b>  | <b>45.4</b> | <b>blue</b> |            |
|            | ENSRNOT00000069930        | 10714632        | 1.98        | 10          | 0           | grey        |            |
|            | ENSRNOT00000069734        | 10911811        | 0.61        | -23         | 4.0         | ylw         |            |
|            | <b>ENSRNOT00000069375</b> | <b>10750874</b> | <b>0.69</b> | <b>-19</b>  | <b>50.4</b> | <b>blue</b> |            |
|            | ENSRNOT00000069295        | 10739864        | 0.71        | -13         | 22.9        | ylw         |            |
|            | <b>ENSRNOT00000068983</b> | <b>10855978</b> | <b>0.74</b> | <b>-13</b>  | <b>47.7</b> | <b>blue</b> |            |
|            | ENSRNOT00000067869        | 10850407        | 1.28        | 11          | 2.6         | ylw         |            |
|            | ENSRNOT00000067296        | 10805514        | 1.25        | 27          | 0           | grey        |            |
|            | ENSRNOT00000065149        | 10804301        | 1.24        | 37          | 5.5         | brwn        |            |
|            | ENSRNOT00000064284        | 10748861        | 0.72        | -19         | 12.9        | turq        |            |
|            | ENSRNOT00000063746        | 10800599        | 0.53        | -16         | 6.4         | blue        |            |
|            | ENSRNOT00000062069        | 10852719        | 1.73        | 13          | 0.8         | blue        |            |
|            | ENSRNOT00000060862        | 10782898        | 1.69        | 118         | 12.6        | blue        |            |
|            | ENSRNOT00000060466        | 10801260        | 1.69        | 13          | 17.0        | blue        |            |
|            | ENSRNOT00000060259        | 10876463        | 1.38        | 15          | 2.6         | blue        |            |
|            | ENSRNOT00000060124        | 10932701        | 0.74        | -48         | 2.7         | blue        |            |
|            | <b>ENSRNOT00000058123</b> | <b>10902762</b> | <b>0.74</b> | <b>-18</b>  | <b>28.9</b> | <b>blue</b> |            |
|            | ENSRNOT00000057159        | 10766878        | 1.65        | 28          | 2.4         | blue        |            |
|            | ENSRNOT00000056869        | 10778718        | 0.80        | -44         | 10.0        | ylw         |            |
|            | ENSRNOT00000055639        | 10866603        | 0.70        | -11         | 16.8        | blue        |            |
|            | ENSRNOT00000054649        | 10930226        | 0.67        | -188        | 6.7         | ylw         |            |
|            | ENSRNOT00000054624        | 10905605        | 0.80        | -46         | 2.8         | ylw         |            |
|            | <b>ENSRNOT00000054574</b> | <b>10873878</b> | <b>0.73</b> | <b>-11</b>  | <b>51.9</b> | <b>blue</b> |            |
|            | ENSRNOT00000054438        | 10745134        | 0.76        | -15         | 8.7         | ylw         |            |
|            | <b>ENSRNOT00000054288</b> | <b>10717396</b> | <b>0.73</b> | <b>-13</b>  | <b>43.1</b> | <b>blue</b> |            |
|            | ENSRNOT00000054178        | 10914316        | 0.73        | -22         | 30.2        | ylw         |            |
|            | ENSRNOT00000054058        | 10910768        | 1.44        | 11          | 0           | grey        |            |
|            | ENSRNOT00000054050        | 10827238        | 0.53        | -18         | 16.4        | blue        |            |
|            | ENSRNOT00000054014        | 10722427        | 0.76        | -12         | 2.5         | black       |            |
|            | ENSRNOT00000053957        | 10829357        | 0.63        | -27         | 14.1        | blue        |            |
|            | ENSRNOT00000053950        | 10749818        | 1.46        | 33          | 0           | grey        |            |
|            | <b>ENSRNOT00000053512</b> | <b>10859302</b> | <b>0.72</b> | <b>-12</b>  | <b>26.3</b> | <b>blue</b> |            |
|            | ENSRNOT00000053504        | 10717139        | 1.66        | 18          | 0           | grey        |            |
|            | ENSRNOT00000053479        | 10851380        | 0.80        | -12         | 39.9        | ylw         |            |
|            | ENSRNOT00000053447        | 10765495        | 0.67        | -29         | 42.8        | ylw         |            |
|            | ENSRNOT00000053432        | 10856795        | 1.49        | 11          | 1.3         | blue        |            |
|            | <b>ENSRNOT00000053366</b> | <b>10752096</b> | <b>0.79</b> | <b>-11</b>  | <b>55.0</b> | <b>blue</b> |            |
|            | ENSRNOT00000053274        | 10754642        | 1.45        | 20          | 10.5        | blue        |            |
|            | ENSRNOT00000053196        | 10829163        | 1.32        | 12          | 0.5         | pink        |            |
|            | ENSRNOT00000053174        | 10851382        | 0.73        | -31         | 43.1        | ylw         |            |
|            | ENSRNOT00000053169        | 10728728        | 1.60        | 13          | 0           | grey        |            |
|            | <b>ENSRNOT00000052993</b> | <b>10722475</b> | <b>0.73</b> | <b>-11</b>  | <b>41.9</b> | <b>blue</b> |            |

|  |                           |                 |             |            |             |             |  |
|--|---------------------------|-----------------|-------------|------------|-------------|-------------|--|
|  | <b>ENSRNOT00000052947</b> | <b>10826602</b> | <b>0.70</b> | <b>-71</b> | <b>56.8</b> | <b>ylw</b>  |  |
|  | <b>ENSRNOT00000052862</b> | <b>10801341</b> | <b>0.65</b> | <b>-12</b> | <b>29.1</b> | <b>blue</b> |  |
|  | ENSRNOT00000052679        | 10903965        | 0.71        | -20        | 3.5         | blue        |  |
|  | ENSRNOT00000052678        | 10731193        | 1.90        | 56         | 0           | grey        |  |
|  | ENSRNOT00000052610        | 10910770        | 1.57        | 27         | 4.0         | blue        |  |
|  | <b>ENSRNOT00000052494</b> | <b>10713604</b> | <b>1.79</b> | <b>90</b>  | <b>1.5</b>  | <b>pink</b> |  |
|  | <b>ENSRNOT00000052431</b> | <b>10750458</b> | <b>0.69</b> | <b>-12</b> | <b>60.4</b> | <b>blue</b> |  |
|  | ENSRNOT00000051903        | 10891010        | 0.65        | -16        | 22.5        | blue        |  |
|  | ENSRNOT00000051851        | 10939758        | 0.75        | -11        | 6.0         | blue        |  |
|  | ENSRNOT00000051223        | 10791274        | 1.50        | 18         | 1.8         | blue        |  |
|  | ENSRNOT00000050121        | 10940063        | 1.39        | 10         | 4.1         | blue        |  |
|  | ENSRNOT00000049673        | 10821820        | 0.76        | -11        | 9.5         | ylw         |  |
|  | ENSRNOT00000048840        | 10747153        | 1.41        | 19         | 20.6        | blue        |  |
|  | ENSRNOT00000047997        | 10855525        | 0.73        | -11        | 35.5        | ylw         |  |
|  | ENSRNOT00000046525        | 10793427        | 1.30        | 18         | 0           | grey        |  |
|  | ENSRNOT00000046248        | 10860184        | 1.50        | 18         | 0           | grey        |  |
|  | ENSRNOT00000046129        | 10798473        | 1.43        | 12         | 0           | grey        |  |
|  | ENSRNOT00000045189        | 10747141        | 1.38        | 25         | 4.0         | blue        |  |
|  | ENSRNOT00000044597        | 10797009        | 1.31        | 236        | 0           | grey        |  |
|  | ENSRNOT00000043970        | 10934560        | 0.68        | -13        | 17.2        | blue        |  |
|  | ENSRNOT00000043059        | 10793600        | 1.33        | 232        | 0           | grey        |  |
|  | ENSRNOT00000042358        | 10779954        | 1.36        | 17         | 0           | grey        |  |
|  | ENSRNOT00000042123        | 10873790        | 0.78        | -103       | 0           | grey        |  |
|  | ENSRNOT00000041305        | 10744937        | 0.68        | -43        | 6.9         | blue        |  |
|  | ENSRNOT00000041132        | 10890648        | 1.22        | 16         | 0           | grey        |  |
|  | ENSRNOT00000039420        | 10911476        | 1.74        | 28         | 16.8        | blue        |  |
|  | ENSRNOT00000039410        | 10844916        | 1.32        | 38         | 2.6         | turq        |  |
|  | ENSRNOT00000038922        | 10751923        | 1.63        | 16         | 5.7         | blue        |  |
|  | ENSRNOT00000038531        | 10774930        | 0.79        | -86        | 31.7        | ylw         |  |
|  | <b>ENSRNOT00000036634</b> | <b>10810836</b> | <b>0.82</b> | <b>-23</b> | <b>23.0</b> | <b>brwn</b> |  |
|  | ENSRNOT00000036104        | 10805524        | 1.85        | 23         | 0.7         | pink        |  |
|  | ENSRNOT00000035374        | 10850519        | 0.79        | -17        | 0           | grey        |  |
|  | ENSRNOT00000035247        | 10755897        | 1.28        | 38         | 0           | grey        |  |
|  | ENSRNOT00000034446        | 10787698        | 1.25        | 16         | 0           | grey        |  |
|  | ENSRNOT00000033610        | 10790346        | 0.79        | -25        | 9.3         | ylw         |  |
|  | ENSRNOT00000030293        | 10718408        | 1.24        | 24         | 9.0         | ylw         |  |
|  | ENSRNOT00000030148        | 10840394        | 0.83        | -20        | 0           | grey        |  |
|  | ENSRNOT00000029150        | 10751919        | 1.63        | 13         | 0           | grey        |  |
|  | ENSRNOT00000028670        | 10728193        | 0.77        | -47        | 7.7         | turq        |  |
|  | ENSRNOT00000025383        | 10920986        | 1.49        | 13         | 3.9         | blue        |  |
|  | ENSRNOT00000020883        | 10823252        | 1.39        | 73         | 0           | grey        |  |
|  | ENSRNOT00000017653        | 10835777        | 0.79        | -15        | 8.8         | ylw         |  |
|  | ENSRNOT00000017383        | 10782229        | 1.20        | 26         | 0           | grey        |  |
|  | ENSRNOT00000010681        | 10869772        | 1.20        | 78         | 3.4         | blue        |  |
|  | ENSRNOT00000008623        | 10895391        | 1.43        | 67         | 4.4         | turq        |  |
|  | ENSRNOT00000005478        | 10732657        | 0.76        | -11        | 1.9         | brwn        |  |
|  | ENSRNOT00000003373        | 10733067        | 1.27        | 40         | 8.4         | brwn        |  |
|  | ENSRNOT00000003180        | 10737422        | 0.81        | -13        | 3.0         | ylw         |  |
|  | ENSRNOT00000003115        | 10731326        | 1.49        | 13         | 2.7         | ylw         |  |
|  | BC090353                  | 10728028        | 1.60        | 960        | 11.2        | blue        |  |
|  | ---                       | <b>10818987</b> | <b>0.68</b> | <b>-15</b> | <b>63.1</b> | <b>blue</b> |  |
|  | ---                       | <b>10930405</b> | <b>0.73</b> | <b>-10</b> | <b>53.5</b> | <b>blue</b> |  |
|  | ---                       | <b>10817191</b> | <b>0.66</b> | <b>-14</b> | <b>42.0</b> | <b>blue</b> |  |
|  | ---                       | <b>10862453</b> | <b>1.90</b> | <b>144</b> | <b>26.9</b> | <b>blue</b> |  |
|  | ---                       | 10851019        | 1.80        | 25         | 20.9        | blue        |  |
|  | ---                       | 10902623        | 1.54        | 74         | 18.6        | blue        |  |
|  | ---                       | 10937568        | 0.60        | -22        | 18.2        | blue        |  |
|  | ---                       | 10869724        | 0.69        | -11        | 16.4        | blue        |  |
|  | ---                       | 10792331        | 1.43        | 36         | 8.6         | blue        |  |
|  | ---                       | 10918865        | 1.43        | 36         | 8.6         | blue        |  |
|  | ---                       | 10749886        | 1.62        | 10         | 8.5         | blue        |  |
|  | ---                       | 10865163        | 2.43        | 45         | 7.2         | blue        |  |
|  | ---                       | 10708587        | 1.59        | 25         | 5.0         | blue        |  |
|  | ---                       | 10714204        | 1.47        | 270        | 4.2         | blue        |  |
|  | ---                       | 10807793        | 1.33        | 177        | 4.1         | blue        |  |
|  | ---                       | 10911847        | 1.33        | 20         | 2.3         | blue        |  |
|  | ---                       | 10921268        | 1.41        | 72         | 2.1         | blue        |  |
|  | ---                       | 10921095        | 0.77        | -23        | 18.5        | brwn        |  |
|  | ---                       | 10800214        | 1.79        | 15         | 0           | grey        |  |

|     |                 |             |             |             |             |
|-----|-----------------|-------------|-------------|-------------|-------------|
| --- | 10922266        | 2.04        | 15          | 0           | grey        |
| --- | 10933576        | 1.32        | 18          | 0           | grey        |
| --- | 10916853        | 1.44        | 10          | 0.8         | pink        |
| --- | 10811898        | 1.36        | 198         | 14.7        | turq        |
| --- | 10750452        | 1.23        | 15          | 1.9         | ylw         |
| --- | <b>10700903</b> | <b>0.77</b> | <b>-272</b> | <b>35.2</b> | <b>blue</b> |
| --- | <b>10700749</b> | <b>1.64</b> | <b>69</b>   | <b>34.1</b> | <b>blue</b> |
| --- | <b>10700398</b> | <b>1.70</b> | <b>313</b>  | <b>33.8</b> | <b>blue</b> |
| --- | 10700714        | 1.70        | 186         | 23.6        | blue        |
| --- | 10700889        | 0.57        | -117        | 20.2        | blue        |
| --- | 10700208        | 2.38        | 109         | 19.9        | blue        |
| --- | 10701605        | 1.63        | 414         | 18.4        | blue        |
| --- | 10700525        | 1.32        | 632         | 17.1        | blue        |
| --- | 10700873        | 1.45        | 1046        | 16.2        | blue        |
| --- | 10700831        | 2.26        | 91          | 15.2        | blue        |
| --- | 10700124        | 1.34        | 197         | 14.3        | blue        |
| --- | 10701140        | 2.34        | 103         | 13.2        | blue        |
| --- | 10701572        | 1.78        | 40          | 11.9        | blue        |
| --- | 10700423        | 1.43        | 31          | 11.1        | blue        |
| --- | 10700968        | 0.52        | -24         | 9.9         | blue        |
| --- | 10700473        | 2.15        | 146         | 8.5         | blue        |
| --- | 10700943        | 0.71        | -32         | 7.8         | blue        |
| --- | 10700172        | 2.04        | 15          | 7.0         | blue        |
| --- | 10701595        | 1.90        | 24          | 6.7         | blue        |
| --- | 10700817        | 0.69        | -12         | 6.2         | blue        |
| --- | 10700464        | 1.98        | 40          | 6.0         | blue        |
| --- | 10700366        | 1.35        | 247         | 6.0         | blue        |
| --- | 10701302        | 1.97        | 68          | 5.8         | blue        |
| --- | 10701243        | 1.77        | 45          | 5.8         | blue        |
| --- | 10700735        | 1.62        | 67          | 5.7         | blue        |
| --- | 10700537        | 1.79        | 43          | 5.6         | blue        |
| --- | 10701029        | 1.50        | 47          | 5.3         | blue        |
| --- | 10700654        | 3.70        | 48          | 5.1         | blue        |
| --- | 10700826        | 2.77        | 36          | 5.0         | blue        |
| --- | 10700112        | 2.12        | 35          | 3.9         | blue        |
| --- | 10701252        | 1.39        | 19          | 3.6         | blue        |
| --- | 10700080        | 2.12        | 25          | 3.0         | blue        |
| --- | 10700725        | 1.58        | 10          | 2.6         | blue        |
| --- | 10700343        | 2.32        | 26          | 1.9         | blue        |
| --- | 10700855        | 2.01        | 32          | 1.9         | blue        |
| --- | 10701300        | 0.55        | -16         | 1.7         | blue        |
| --- | 10700666        | 2.03        | 11          | 1.6         | blue        |
| --- | 10700535        | 1.88        | 30          | 1.3         | blue        |
| --- | 10700726        | 0.65        | -13         | 1.1         | blue        |
| --- | <b>10700861</b> | <b>0.64</b> | <b>-100</b> | <b>24.8</b> | <b>brwn</b> |
| --- | 10701094        | 0.74        | -122        | 14.8        | brwn        |
| --- | 10700571        | 0.80        | -932        | 13.0        | brwn        |
| --- | 10700462        | 0.83        | -321        | 11.6        | brwn        |
| --- | 10700372        | 0.72        | -92         | 10.4        | brwn        |
| --- | 10701413        | 1.31        | 190         | 9.1         | brwn        |
| --- | 10701033        | 1.51        | 17          | 2.8         | brwn        |
| --- | 10701333        | 1.25        | 508         | 1.8         | brwn        |
| --- | 10701440        | 0.82        | -14         | 1.3         | brwn        |
| --- | 10701517        | 0.76        | -165        | 0           | grey        |
| --- | 10701505        | 0.68        | -44         | 0           | grey        |
| --- | 10700614        | 0.72        | -13         | 0           | grey        |
| --- | 10700835        | 0.78        | -11         | 0           | grey        |
| --- | 10700763        | 0.70        | -10         | 0           | grey        |
| --- | 10701237        | 0.66        | -10         | 0           | grey        |
| --- | 10700587        | 1.30        | 12          | 0           | grey        |
| --- | 10701117        | 1.32        | 12          | 0           | grey        |
| --- | 10701236        | 1.73        | 13          | 0           | grey        |
| --- | 10700638        | 1.39        | 13          | 0           | grey        |
| --- | 10700353        | 1.52        | 14          | 0           | grey        |
| --- | 10700098        | 1.46        | 14          | 0           | grey        |
| --- | 10700363        | 1.83        | 14          | 0           | grey        |
| --- | 10700650        | 1.54        | 14          | 0           | grey        |
| --- | 10700551        | 1.68        | 15          | 0           | grey        |
| --- | 10700489        | 1.77        | 18          | 0           | grey        |



|     |          |      |     |      |      |  |
|-----|----------|------|-----|------|------|--|
| --- | 10700282 | 1.89 | 20  | 0    | grey |  |
| --- | 10701045 | 1.74 | 20  | 0    | grey |  |
| --- | 10701169 | 2.10 | 20  | 0    | grey |  |
| --- | 10701268 | 1.82 | 21  | 0    | grey |  |
| --- | 10700221 | 1.58 | 22  | 0    | grey |  |
| --- | 10700543 | 2.84 | 23  | 0    | grey |  |
| --- | 10700715 | 1.72 | 23  | 0    | grey |  |
| --- | 10700424 | 1.42 | 24  | 0    | grey |  |
| --- | 10701478 | 1.72 | 25  | 0    | grey |  |
| --- | 10700541 | 1.54 | 26  | 0    | grey |  |
| --- | 10701619 | 2.29 | 27  | 0    | grey |  |
| --- | 10700893 | 1.30 | 27  | 0    | grey |  |
| --- | 10701489 | 1.84 | 27  | 0    | grey |  |
| --- | 10700508 | 2.10 | 29  | 0    | grey |  |
| --- | 10701432 | 2.03 | 31  | 0    | grey |  |
| --- | 10701156 | 2.14 | 34  | 0    | grey |  |
| --- | 10701161 | 2.12 | 36  | 0    | grey |  |
| --- | 10700766 | 2.41 | 37  | 0    | grey |  |
| --- | 10700657 | 1.89 | 37  | 0    | grey |  |
| --- | 10701291 | 2.27 | 37  | 0    | grey |  |
| --- | 10700189 | 1.60 | 38  | 0    | grey |  |
| --- | 10701030 | 1.48 | 42  | 0    | grey |  |
| --- | 10700984 | 1.76 | 44  | 0    | grey |  |
| --- | 10700213 | 2.63 | 45  | 0    | grey |  |
| --- | 10700400 | 1.34 | 47  | 0    | grey |  |
| --- | 10700228 | 1.84 | 57  | 0    | grey |  |
| --- | 10701506 | 2.19 | 59  | 0    | grey |  |
| --- | 10701121 | 1.69 | 75  | 0    | grey |  |
| --- | 10700847 | 2.96 | 78  | 0    | grey |  |
| --- | 10700290 | 1.87 | 93  | 0    | grey |  |
| --- | 10701051 | 1.44 | 115 | 0    | grey |  |
| --- | 10701541 | 1.32 | 216 | 0    | grey |  |
| --- | 10701009 | 1.51 | 70  | 0.4  | pink |  |
| --- | 10701359 | 2.11 | 31  | 0.4  | pink |  |
| --- | 10701568 | 0.56 | -70 | 22.0 | turq |  |
| --- | 10700815 | 0.70 | -57 | 17.8 | turq |  |
| --- | 10700451 | 0.68 | -74 | 13.8 | turq |  |
| --- | 10701022 | 1.88 | 11  | 7.2  | turq |  |
| --- | 10700637 | 0.64 | -79 | 5.9  | turq |  |
| --- | 10700950 | 1.98 | 37  | 2.4  | turq |  |
| --- | 10701516 | 2.65 | 71  | 2.2  | turq |  |
| --- | 10700925 | 1.89 | 54  | 1.4  | turq |  |
| --- | 10701067 | 1.70 | 23  | 3.8  | ylw  |  |
| --- | 10701113 | 1.32 | 12  | 3.6  | ylw  |  |
| --- | 10701279 | 1.28 | 129 | 1.3  | ylw  |  |
| --- | 10700770 | 1.96 | 23  | 0.5  | ylw  |  |

#### H. Male Liver

| Gene Symbol             | RefSeq/GenBank/<br>Ensemble Number | Affymetrix<br>Probset ID | V/C  | Mean<br>Diff. | k.in | Mod  | Gene Title                                  |
|-------------------------|------------------------------------|--------------------------|------|---------------|------|------|---------------------------------------------|
| <b>APOPTOSIS</b>        |                                    |                          |      |               |      |      |                                             |
| Lsp1                    | NM_001025420                       | 10712477                 | 1.23 | 29            | 5.7  | brwn | lymphocyte-specific protein 1               |
| <b>CELL CYCLE</b>       |                                    |                          |      |               |      |      |                                             |
| Bop1                    | NM_001024250                       | 10904930                 | 0.82 | -21           | 24.2 | turq | block of proliferation 1                    |
| Clock                   | NM_021856                          | 10772249                 | 1.36 | 91            | 2.4  | brwn | clock homolog (mouse)                       |
| Osgin1                  | NM_138504                          | 10808302                 | 1.64 | 45            | 0    | grey | oxidative stress induced growth inhibitor 1 |
| <b>CYTOSKELETON-ECM</b> |                                    |                          |      |               |      |      |                                             |
| Clec4a1                 | NM_001005890                       | 10858553                 | 1.45 | 56            | 12.1 | turq | C-type lectin domain family 4, member a1    |
| Enc1                    | NM_001003401                       | 10812689                 | 0.50 | -77           | 0    | grey | ectodermal-neural cortex 1                  |
| Fgl2                    | NM_053455                          | 10860231                 | 1.40 | 68            | 6.1  | turq | fibrinogen-like 2                           |
| Flna                    | NM_001134599                       | 10936086                 | 1.27 | 60            | 4.5  | brwn | filamin A, alpha                            |
| GpnmB                   | NM_133298                          | 10855449                 | 1.42 | 22            | 7.0  | turq | glycoprotein (transmembrane) nmb            |
| Jam3                    | NM_001004269                       | 10915910                 | 0.79 | -28           | 1.0  | ylw  | junctional adhesion molecule 3              |
| Lgals3                  | NM_031832                          | 10779673                 | 1.31 | 40            | 0    | grey | lectin, galactoside-binding, soluble, 3     |
| Lmnb1                   | NM_053905                          | 10801821                 | 1.22 | 13            | 0    | grey | lamin B1                                    |
| Msn                     | NM_030863                          | 10934056                 | 1.41 | 104           | 9.1  | brwn | moesin                                      |
| Nrcam                   | NM_013150                          | 10884430                 | 0.66 | -13           | 13.0 | brwn | neuronal cell adhesion molecule             |
| Pkp2                    | NM_001100499                       | 10752576                 | 0.82 | -31           | 0    | grey | plakophilin 2                               |

|                           |                    |          |      |      |      |      |                                                                                   |
|---------------------------|--------------------|----------|------|------|------|------|-----------------------------------------------------------------------------------|
| Sdc4                      | NM_012649          | 10851599 | 0.80 | -170 | 0    | grey | syndecan 4                                                                        |
| Stom                      | NM_001011965       | 10844666 | 1.38 | 90   | 0    | grey | stomatin                                                                          |
| Tagln2                    | NM_001013127       | 10765772 | 1.43 | 93   | 0    | grey | transgelin 2                                                                      |
| Tspan13                   | NM_001013244       | 10889675 | 1.26 | 126  | 6.4  | turq | tetraspanin 13                                                                    |
| Tspan18                   | NM_001107750       | 10847562 | 1.37 | 32   | 13.3 | brwn | tetraspanin 18                                                                    |
| <b>DEVELOPMENT</b>        |                    |          |      |      |      |      |                                                                                   |
| Atxn7l1                   | ENSRNOT00000014054 | 10884189 | 1.33 | 31   | 12.1 | brwn | ataxin 7-like 1                                                                   |
| Bank1                     | NM_001047918       | 10826969 | 1.42 | 12   | 1.1  | turq | B-cell scaffold protein with ankyrin repeats 1                                    |
| Bxdc1                     | NM_001106391       | 10833643 | 0.76 | -59  | 0    | grey | brix domain containing 1                                                          |
| Cryab                     | NM_012935          | 10909892 | 0.70 | -55  | 0    | grey | crystallin, alpha B                                                               |
| Dem1                      | NM_001107973       | 10879446 | 1.37 | 26   | 2.1  | ylw  | defects in morphology 1 homolog (S. cerevisiae)                                   |
| Dpt                       | NM_001105965       | 10765280 | 0.68 | -423 | 0    | grey | dermatopontin                                                                     |
| Epm2a                     | ENSRNOT00000061930 | 10701792 | 0.73 | -17  | 0    | grey | epilepsy, progressive myoclonus type 2A                                           |
| Gcom1                     | NM_001014211       | 10918586 | 1.25 | 31   | 0    | grey | GRINL1A complex locus                                                             |
| Homez                     | NM_152849          | 10783662 | 1.26 | 28   | 0    | grey | homeobox and leucine zipper encoding                                              |
| LOC691658                 | ENSRNOT00000057704 | 10918364 | 0.73 | -52  | 0    | grey | similar to anterior pharynx defective 1b homolog                                  |
| Lpin1                     | NM_001012111       | 10889269 | 0.51 | -218 | 3.0  | ylw  | lipin 1                                                                           |
| Lrrc10                    | NM_001128494       | 10895585 | 0.53 | -110 | 0    | grey | leucine-rich repeat-containing 10                                                 |
| Midn                      | NM_001191577       | 10900592 | 1.32 | 27   | 1.4  | brwn | midnolin                                                                          |
| Mpzl2                     | NM_001106818       | 10909590 | 1.31 | 34   | 0    | grey | myelin protein zero-like 2                                                        |
| Nedd9                     | NM_001011922       | 10794599 | 1.29 | 38   | 10.6 | brwn | neural precursor cell expressed, developmentally down-regulated 9                 |
| Per1                      | NM_001034125       | 10734882 | 0.43 | -68  | 0    | grey | period homolog 1 (Drosophila)                                                     |
| RGD1306820                | NM_001107557       | 10711743 | 0.79 | -32  | 6.3  | brwn | similar to erythroid differentiation-related factor 1                             |
| Sh3pxd2a                  | NM_001107606       | 10730661 | 1.37 | 12   | 9.2  | brwn | SH3 and PX domains 2A                                                             |
| Zpbp2                     | NM_001007011       | 10738015 | 0.82 | -13  | 0    | grey | zona pellucida binding protein 2                                                  |
| <b>DNA REPAIR</b>         |                    |          |      |      |      |      |                                                                                   |
| Rad51l1                   | ENSRNOT0000006043  | 10885589 | 0.75 | -15  | 0    | grey | RAD51-like 1 (S. cerevisiae)                                                      |
| Rad54l2                   | NM_001134520       | 10919967 | 1.24 | 42   | 11.8 | turq | Rad54 like 2 (S. cerevisiae)                                                      |
| Tp53inp1                  | NM_181084          | 10867609 | 0.67 | -93  | 0    | grey | tumor protein p53 inducible nuclear protein 1                                     |
| <b>ELECTRON TRANSPORT</b> |                    |          |      |      |      |      |                                                                                   |
| Cyba                      | NM_024160          | 10811571 | 1.23 | 13   | 0    | grey | cytochrome b-245, alpha polypeptide                                               |
| Cybb                      | NM_023965          | 10936899 | 1.51 | 139  | 16.2 | turq | cytochrome b-245, beta polypeptide                                                |
| Txnip                     | NM_001008767       | 10817552 | 1.36 | 608  | 3.0  | turq | thioredoxin interacting protein                                                   |
| <b>EPIGENETICS</b>        |                    |          |      |      |      |      |                                                                                   |
| Hbxip                     | NM_001106462       | 10818257 | 1.22 | 61   | 14.7 | blue | hepatitis B virus x interacting protein                                           |
| Id2                       | NM_013060          | 10889379 | 1.33 | 67   | 3.1  | brwn | inhibitor of DNA binding 2                                                        |
| Jmjd1c                    | NM_001191719       | 10832829 | 1.44 | 107  | 15.6 | brwn | jumonji domain containing 1C                                                      |
| LOC100365770              | XM_002727530       | 10936923 | 0.80 | -11  | 0    | grey | histone variant H2a2-like                                                         |
| Mbd1                      | NM_001011924       | 10802621 | 0.83 | -17  | 3.6  | turq | methyl-CpG binding domain protein 1                                               |
| Pcgf5                     | NM_001129882       | 10714963 | 0.81 | -40  | 0    | grey | polycomb group ring finger 5                                                      |
| Phf15                     | NM_001106998       | 10742533 | 1.37 | 21   | 0    | grey | PHD finger protein 15                                                             |
| Smyd3                     | NM_001025762       | 10770241 | 0.81 | -14  | 0.8  | turq | SET and MYND domain containing 3                                                  |
| <b>GROWTH FACTORS</b>     |                    |          |      |      |      |      |                                                                                   |
| Ccl5                      | NM_031116          | 10745631 | 1.24 | 18   | 0    | grey | chemokine (C-C motif) ligand 5                                                    |
| Ccl6                      | NM_001004202       | 10745670 | 1.30 | 43   | 13.9 | turq | chemokine (C-C motif) ligand 6                                                    |
| Ccr5                      | NM_053960          | 10914618 | 1.36 | 18   | 19.1 | turq | chemokine (C-C motif) receptor 5                                                  |
| Ccr1l                     | ENSRNOT00000015265 | 10919712 | 1.46 | 37   | 8.5  | turq | chemokine (C-C motif) receptor-like 1                                             |
| Creg1                     | NM_001105966       | 10765335 | 0.70 | -71  | 10.4 | brwn | cellular repressor of E1A-stimulated genes 1                                      |
| Csf1r                     | NM_001029901       | 10802065 | 1.43 | 80   | 19.4 | brwn | colony stimulating factor 1 receptor                                              |
| Csf2rb                    | NM_133555          | 10897428 | 1.38 | 13   | 16.8 | brwn | colony stimulating factor 2 receptor, beta, low-affinity (granulocyte-macrophage) |
| Pdgfra                    | NM_012802          | 10776459 | 1.34 | 68   | 13.7 | brwn | platelet derived growth factor receptor, alpha polypeptide                        |
| Tbrg4                     | NM_001012154       | 10778361 | 0.81 | -37  | 0.5  | mgnt | transforming growth factor beta regulator 4                                       |
| <b>IMMUNE RESPONSE</b>    |                    |          |      |      |      |      |                                                                                   |
| C1qc                      | NM_001008524       | 10880731 | 1.31 | 112  | 22.7 | brwn | complement component 1, q subcomponent, C chain                                   |
| CD163                     | NM_001107887       | 10858626 | 1.37 | 42   | 21.7 | brwn | CD163 molecule                                                                    |
| Cd36                      | NM_031561          | 10853240 | 1.22 | 45   | 11.5 | brwn | CD36 molecule (thrombospondin receptor)                                           |
| Cd38                      | NM_013127          | 10777232 | 1.27 | 18   | 0    | grey | CD38 molecule                                                                     |
| Cd4                       | NM_012705          | 10865585 | 1.37 | 47   | 14.0 | brwn | Cd4 molecule                                                                      |
| Cd5l                      | NM_001025685       | 10816270 | 1.65 | 12   | 0    | grey | Cd5 molecule-like                                                                 |
| Cd97                      | NM_001012164       | 10806806 | 1.23 | 16   | 17.4 | brwn | CD97 molecule                                                                     |
| Cfp                       | NM_001106757       | 10936510 | 1.32 | 24   | 12.4 | brwn | complement factor properdin                                                       |
| Fcgr1g                    | NM_001131001       | 10769825 | 1.40 | 110  | 22.9 | brwn | Fc fragment of IgE, high affinity I, receptor for; gamma polypeptide              |
| Fcgr1a                    | NM_001100836       | 10825153 | 1.37 | 23   | 0    | grey | Fc fragment of IgG, high affinity Ia, receptor (CD64)                             |
| Ifi47                     | NM_172019          | 10733056 | 1.53 | 107  | 15.7 | brwn | interferon gamma inducible protein 47                                             |
| Irf1                      | NM_012591          | 10733553 | 1.30 | 11   | 0    | grey | interferon regulatory factor 1                                                    |
| Irf8                      | NM_001008722       | 10808431 | 1.45 | 18   | 0    | grey | interferon regulatory factor 8                                                    |
| Klrc3                     | NM_001029908       | 10866052 | 1.70 | 15   | 0    | grey | killer cell lectin-like receptor subfamily C, member 3                            |
| Klri1                     | NM_001012649       | 10866067 | 1.39 | 13   | 1.2  | ylw  | killer cell lectin-like receptor family I member 1                                |

|                                         |                     |                 |             |            |             |             |                                                                                     |
|-----------------------------------------|---------------------|-----------------|-------------|------------|-------------|-------------|-------------------------------------------------------------------------------------|
| Ly6c                                    | NM_020103           | 10904578        | 1.65        | 71         | 0           | grey        | Ly6-C antigen                                                                       |
| <b>Ly6e</b>                             | <b>NM_001017467</b> | <b>10897054</b> | <b>1.32</b> | <b>89</b>  | <b>23.3</b> | <b>brwn</b> | <b>lymphocyte antigen 6 complex, locus E</b>                                        |
| Ly86                                    | NM_001106128        | 10798027        | 1.41        | 61         | 17.5        | turq        | lymphocyte antigen 86                                                               |
| Mpa2l                                   | ENSRNOT00000040985  | 10771171        | 1.50        | 16         | 0           | grey        | macrophage activation 2 like                                                        |
| RGD1561778                              | NM_001168284        | 10748857        | 1.21        | 11         | 0           | grey        | similar to dendritic cell-derived immunoglobulin(Ig)-like receptor 1, DlgR1 - mouse |
| Siglec5                                 | NM_001106249        | 10706297        | 1.34        | 10         | 16.1        | brwn        | sialic acid binding Ig-like lectin 5                                                |
| <b>METABOLISM &amp; TRANSPORT</b>       |                     |                 |             |            |             |             |                                                                                     |
| Acaca                                   | NM_022193           | 10736957        | 0.68        | -63        | 6.4         | blue        | acetyl-coenzyme A carboxylase alpha                                                 |
| AcsM3                                   | NM_033231           | 10710295        | 1.31        | 23         | 0           | grey        | acyl-CoA synthetase medium-chain family member 3                                    |
| Alas2                                   | NM_013197           | 10932912        | 1.28        | 31         | 1.7         | brwn        | aminolevulinic acid, delta-, synthase 2                                             |
| Aox3                                    | NM_001008527        | 10923432        | 0.74        | -81        | 5.4         | brwn        | aldehyde oxidase 3                                                                  |
| Aspa                                    | NM_024399           | 10744766        | 1.29        | 42         | 2.7         | turq        | aspartoacylase                                                                      |
| Atp1b1                                  | NM_013113           | 10769476        | 1.31        | 335        | 0           | grey        | ATPase, Na <sup>+</sup> /K <sup>+</sup> transporting, beta 1 polypeptide            |
| Cds2                                    | NM_053643           | 10840085        | 1.23        | 99         | 18.5        | turq        | CDP-diacylglycerol synthase (phosphatidate cytidylyltransferase) 2                  |
| Cth                                     | NM_017074           | 10827517        | 1.23        | 52         | 0           | grey        | cystathionase (cystathionine gamma-lyase)                                           |
| Dnase1l3                                | NM_053907           | 10779496        | 1.30        | 19         | 3.8         | turq        | deoxyribonuclease 1-like 3                                                          |
| Elovl6                                  | NM_134383           | 10819005        | 0.39        | -59        | 0           | grey        | ELOVL family member 6, elongation of long chain fatty acids (yeast)                 |
| Hbb                                     | NM_033234           | 10724315        | 1.39        | 434        | 0           | grey        | hemoglobin, beta                                                                    |
| Hebp1                                   | NM_001108651        | 10866417        | 1.22        | 12         | 1.4         | blue        | heme binding protein 1                                                              |
| Lcp1                                    | NM_001012044        | 10781496        | 1.34        | 112        | 0           | grey        | lymphocyte cytosolic protein 1                                                      |
| Npl                                     | NM_001013984        | 10768726        | 1.38        | 37         | 0           | grey        | N-acetylneuraminic acid pyruvate lyase                                              |
| Oscp1                                   | NM_001029923        | 10871984        | 0.79        | -30        | 0           | grey        | organic solute carrier partner 1                                                    |
| Pdhh                                    | NM_001007620        | 10779485        | 0.83        | -239       | 3.2         | turq        | pyruvate dehydrogenase (lipoamide) beta                                             |
| Plscr2                                  | NM_001014094        | 10912229        | 1.22        | 16         | 0           | grey        | phospholipid scramblase 2                                                           |
| Ppox                                    | NM_001105968        | 10769840        | 0.82        | -17        | 2.4         | brwn        | protoporphyrinogen oxidase                                                          |
| Ptgs1                                   | NM_017043           | 10835817        | 1.39        | 11         | 2.3         | brwn        | prostaglandin-endoperoxide synthase 1                                               |
| Qpctl                                   | NM_001106230        | 10719386        | 0.80        | -15        | 6.8         | brwn        | glutamyl-peptide cyclotransferase-like                                              |
| Qsox2                                   | NM_001109434        | 10843664        | 0.81        | -24        | 8.6         | turq        | quiescins Q6 sulfhydryl oxidase 2                                                   |
| Scd                                     | NM_031841           | 10715546        | 1.30        | 111        | 6.7         | turq        | stearoyl-CoA desaturase (delta-9-desaturase)                                        |
| Slc16a1                                 | NM_012716           | 10818090        | 1.40        | 133        | 12.0        | brwn        | solute carrier family 16, member 1 (monocarboxylic acid transporter 1)              |
| Slc25a32                                | NM_001173334        | 10903482        | 0.78        | -43        | 0           | grey        | solute carrier family 25, member 32                                                 |
| Slc44a2                                 | NM_001134715        | 10908369        | 1.33        | 49         | 0           | grey        | solute carrier family 44, member 2                                                  |
| Slc8a1                                  | NM_019268           | 10888110        | 1.27        | 26         | 5.7         | ylw         | solute carrier family 8 (sodium/calcium exchanger), member 1                        |
| <b>St3gal2</b>                          | <b>NM_031695</b>    | <b>10808034</b> | <b>1.27</b> | <b>23</b>  | <b>25.4</b> | <b>brwn</b> | <b>ST3 beta-galactoside alpha-2,3-sialyltransferase 2</b>                           |
| Upp2                                    | NM_001106481        | 10836312        | 0.62        | -14        | 0.7         | brwn        | uridine phosphorylase 2                                                             |
| <b>PROTEOLYSIS</b>                      |                     |                 |             |            |             |             |                                                                                     |
| Ctla2a                                  | NM_001109115        | 10793675        | 1.38        | 34         | 0           | grey        | cytotoxic T lymphocyte-associated protein 2 alpha                                   |
| Ctss                                    | NM_017320           | 10817429        | 1.38        | 124        | 12.4        | brwn        | cathepsin S                                                                         |
| Dcun1d3                                 | NM_001024886        | 10718643        | 0.83        | -35        | 0           | grey        | DCN1, defective in cullin neddylation 1, domain containing 3 (S. cerevisiae)        |
| Laptm5                                  | NM_053538           | 10872489        | 1.24        | 23         | 11.5        | brwn        | lysosomal protein transmembrane 5                                                   |
| Napsa                                   | NM_031670           | 10706586        | 1.33        | 13         | 0.4         | ylw         | napsin A aspartic peptidase                                                         |
| <b>PsmD5</b>                            | <b>NM_001106569</b> | <b>10844587</b> | <b>0.82</b> | <b>-53</b> | <b>27.5</b> | <b>brwn</b> | <b>proteasome (prosome, macropain) 26S subunit, non-ATPase, 5</b>                   |
| Rnf125                                  | NM_001108424        | 10800434        | 1.59        | 47         | 12.8        | brwn        | ring finger protein 125                                                             |
| Ubx2b                                   | NM_001107905        | 10867505        | 0.81        | -13        | 0           | grey        | UBX domain protein 2B                                                               |
| <b>RECEPTORS &amp; BINDING PROTEINS</b> |                     |                 |             |            |             |             |                                                                                     |
| Adora1                                  | NM_017155           | 10767771        | 0.74        | -14        | 1.0         | ylw         | adenosine A1 receptor                                                               |
| <b>Axl</b>                              | <b>NM_031794</b>    | <b>10719900</b> | <b>1.30</b> | <b>54</b>  | <b>25.1</b> | <b>brwn</b> | <b>Axl receptor tyrosine kinase</b>                                                 |
| Calcr1                                  | NM_012717           | 10846762        | 1.25        | 30         | 8.8         | brwn        | calcitonin receptor-like                                                            |
| Epha2                                   | NM_001108977        | 10873706        | 1.56        | 14         | 0           | grey        | Eph receptor A2                                                                     |
| Esrra                                   | NM_001008511        | 10728247        | 0.82        | -10        | 8.2         | brwn        | estrogen related receptor, alpha                                                    |
| Flt1                                    | NM_019306           | 10756418        | 1.29        | 16         | 4.4         | brwn        | fms-related tyrosine kinase 1                                                       |
| Il6ra                                   | NM_017020           | 10824530        | 0.66        | -54        | 8.8         | brwn        | interleukin 6 receptor, alpha                                                       |
| LOC684994                               | ENSRNOT00000033048  | 10782469        | 1.40        | 27         | 2.0         | brwn        | similar to retinoic acid receptor, beta                                             |
| <b>Mrc1</b>                             | <b>NM_001106123</b> | <b>10796476</b> | <b>1.39</b> | <b>73</b>  | <b>20.9</b> | <b>brwn</b> | <b>mannose receptor, C type 1</b>                                                   |
| Ms4a11                                  | ENSRNOT00000033795  | 10714020        | 1.28        | 18         | 14.9        | turq        | membrane-spanning 4-domains, subfamily A, member 11                                 |
| Obfc2a                                  | NM_001014216        | 10923270        | 0.68        | -158       | 16.4        | blue        | oligonucleotide/oligosaccharide-binding fold containing 2A                          |
| Plxdc2                                  | NM_001108422        | 10796564        | 1.28        | 24         | 14.9        | brwn        | plexin domain containing 2                                                          |
| Pth1r                                   | NM_020073           | 10920524        | 1.29        | 21         | 12.5        | brwn        | parathyroid hormone 1 receptor                                                      |
| S100a10                                 | NM_031114           | 10817186        | 1.24        | 194        | 0           | grey        | S100 calcium binding protein A10                                                    |
| Sort1                                   | NM_031767           | 10818326        | 1.25        | 86         | 0           | grey        | sortilin 1                                                                          |
| Stbd1                                   | NM_001013988        | 10775794        | 0.78        | -12        | 0           | grey        | starch binding domain 1                                                             |
| <b>SIGNALING</b>                        |                     |                 |             |            |             |             |                                                                                     |
| Anxa3                                   | NM_012823           | 10775628        | 1.25        | 23         | 0           | grey        | annexin A3                                                                          |
| Arap2                                   | NM_001107216        | 10772863        | 0.82        | -27        | 2.4         | ylw         | ArfGAP with RhoGAP domain, ankyrin repeat and PH domain 2                           |
| C2cd2l                                  | NM_001011996        | 10916734        | 0.77        | -25        | 16.8        | turq        | C2 calcium-dependent domain containing 2-like                                       |
| Camk2g                                  | NM_133605           | 10779031        | 1.20        | 16         | 0           | grey        | calcium/calmodulin-dependent protein kinase II gamma                                |
| <b>Cdgap</b>                            | <b>NM_001105879</b> | <b>10751255</b> | <b>1.24</b> | <b>13</b>  | <b>22.0</b> | <b>brwn</b> | <b>Cdc42 GTPase-activating protein</b>                                              |
| Chka                                    | NM_017127           | 10712706        | 1.38        | 50         | 7.6         | brwn        | choline kinase alpha                                                                |

|                                               |                    |          |      |      |      |       |                                                                                         |
|-----------------------------------------------|--------------------|----------|------|------|------|-------|-----------------------------------------------------------------------------------------|
| Csnk1d                                        | NM_139060          | 10749742 | 0.81 | -63  | 0    | grey  | casein kinase 1, delta                                                                  |
| Emr1                                          | NM_001007557       | 10931222 | 1.62 | 37   | 13.6 | turq  | EGF-like module containing, mucin-like, hormone receptor-like 1                         |
| Emr4                                          | NM_001007558       | 10930717 | 1.46 | 11   | 8.9  | turq  | EGF-like module containing, mucin-like, hormone receptor-like sequence 4                |
| Ficd                                          | NM_001010946       | 10762893 | 0.73 | -20  | 16.4 | brwn  | FIC domain containing                                                                   |
| Frm4b                                         | ENSRNOT00000010717 | 10864371 | 0.77 | -19  | 0    | grey  | FERM domain containing 4B                                                               |
| Gbp2                                          | NM_133624          | 10819523 | 1.31 | 23   | 6.8  | brwn  | guanylate binding protein 2                                                             |
| Gnl3                                          | NM_175580          | 10790002 | 0.80 | -32  | 0    | grey  | guanine nucleotide binding protein-like 3 (nucleolar)                                   |
| Gucy1a3                                       | NM_017090          | 10823920 | 1.21 | 21   | 5.1  | brwn  | guanylate cyclase 1, soluble, alpha 3                                                   |
| Insig2                                        | NM_178091          | 10767175 | 1.60 | 188  | 0.2  | mgnt  | insulin induced gene 2                                                                  |
| Ip6k2                                         | NM_021660          | 10913242 | 0.67 | -43  | 4.2  | brwn  | inositol hexakisphosphate kinase 2                                                      |
| Nek7                                          | NM_001108346       | 10768177 | 1.26 | 113  | 0    | grey  | NIMA (never in mitosis gene a)-related kinase 7                                         |
| Pde2a                                         | NM_031079          | 10709200 | 1.31 | 12   | 4.2  | brwn  | phosphodiesterase 2A, cGMP-stimulated                                                   |
| Pdk4                                          | NM_053551          | 10860900 | 2.10 | 79   | 4.5  | brwn  | pyruvate dehydrogenase kinase, isozyme 4                                                |
| Phospho2                                      | NM_001007642       | 10836633 | 0.77 | -66  | 3.03 | green | phosphatase, orphan 2                                                                   |
| Pik3r1                                        | NM_013005          | 10821050 | 0.80 | -88  | 0    | grey  | phosphoinositide-3-kinase, regulatory subunit 1 (alpha)                                 |
| Pip4k2a                                       | NM_053926          | 10799909 | 1.23 | 18   | 15.9 | brwn  | phosphatidylinositol-5-phosphate 4-kinase, type II, alpha                               |
| Plk2                                          | NM_031821          | 10812954 | 0.78 | -44  | 0    | grey  | polo-like kinase 2 (Drosophila)                                                         |
| Prkci                                         | NM_032059          | 10822644 | 1.22 | 78   | 0    | grey  | protein kinase C, iota                                                                  |
| Ptprc                                         | NM_138507          | 10768138 | 1.42 | 48   | 17.6 | turq  | protein tyrosine phosphatase, receptor type, C                                          |
| Rab3il1                                       | NM_134411          | 10713833 | 1.28 | 24   | 0    | grey  | RAB3A interacting protein (rabin3)-like 1                                               |
| Rac2                                          | NM_001008384       | 10905316 | 1.47 | 24   | 2.5  | brwn  | ras-related C3 botulinum toxin substrate 2 (rho family, small GTP binding protein Rac2) |
| Rara                                          | NM_031528          | 10738130 | 1.26 | 21   | 18.3 | brwn  | retinoic acid receptor, alpha                                                           |
| Rarb                                          | AJ002942           | 10786108 | 1.42 | 26   | 5.0  | brwn  | retinoic acid receptor, beta                                                            |
| RGD1562101                                    | ENSRNOT00000039652 | 10820145 | 0.72 | -24  | 0    | grey  | similar to very large G-protein coupled receptor 1                                      |
| Rgl1                                          | NM_001105957       | 10768588 | 1.32 | 44   | 28.0 | brwn  | ral guanine nucleotide dissociation stimulator,-like 1                                  |
| Ror1                                          | NM_001108671       | 10870190 | 1.24 | 14   | 0    | grey  | receptor tyrosine kinase-like orphan receptor 1                                         |
| Sgk1                                          | NM_019232          | 10717331 | 1.79 | 241  | 0    | grey  | serum/glucocorticoid regulated kinase 1                                                 |
| Sh3g3                                         | NM_031238          | 10708338 | 0.81 | -22  | 5.28 | green | SH3-domain GRB2-like 3                                                                  |
| Tek                                           | NM_001105737       | 10869946 | 1.29 | 37   | 13.4 | brwn  | TEK tyrosine kinase, endothelial                                                        |
| Vav2                                          | NM_001106563       | 10843959 | 0.77 | -18  | 12.9 | turq  | vav 2 guanine nucleotide exchange factor                                                |
| <b>TRANSCRIPTION</b>                          |                    |          |      |      |      |       |                                                                                         |
| Ankrd12                                       | NM_001108238       | 10930268 | 0.83 | -37  | 0    | grey  | ankyrin repeat domain 12                                                                |
| Ankrd50                                       | NM_001191606       | 10822950 | 1.21 | 20   | 0    | grey  | ankyrin repeat domain 50                                                                |
| Elf1                                          | NM_053520          | 10781690 | 1.27 | 72   | 0    | grey  | E74-like factor 1                                                                       |
| Elk3                                          | NM_001108743       | 10901904 | 1.28 | 21   | 9.8  | brwn  | ELK3, member of ETS oncogene family                                                     |
| Fam134b                                       | ENSRNOT00000014052 | 10813947 | 0.83 | -45  | 0    | grey  | family with sequence similarity 134, member B                                           |
| Fyn                                           | NM_012755          | 10830382 | 1.28 | 27   | 21.6 | brwn  | FYN oncogene related to SRC, FGR, YES                                                   |
| Id3                                           | NM_013058          | 10872972 | 1.65 | 57   | 7.6  | brwn  | inhibitor of DNA binding 3                                                              |
| Klrk1                                         | NM_133512          | 10866041 | 1.52 | 11   | 0    | grey  | killer cell lectin-like receptor subfamily K, member 1                                  |
| LOC100360929                                  | ENSRNOT00000030597 | 10809086 | 0.79 | -60  | 4.2  | turq  | Ab1-108-like                                                                            |
| LOC690012                                     | ENSRNOT00000033110 | 10825094 | 1.47 | 28   | 0    | grey  | similar to High mobility group protein 2 (HMG-2)                                        |
| Myg1                                          | NM_001005545       | 10899537 | 0.76 | -36  | 5.3  | blue  | melanocyte proliferating gene 1                                                         |
| Pspc1                                         | NM_001025672       | 10784091 | 0.81 | -57  | 0    | grey  | paraspeckle component 1                                                                 |
| Sall1                                         | NM_001107415       | 10806314 | 0.46 | -21  | 0    | grey  | sal-like 1 (Drosophila)                                                                 |
| Steap4                                        | NM_001044265       | 10860597 | 1.30 | 45   | 16.3 | brwn  | STEAP family member 4                                                                   |
| Stx2                                          | NM_012748          | 10758050 | 1.24 | 27   | 26.1 | brwn  | syntaxin 2                                                                              |
| Tspyl4                                        | NM_001012075       | 10830285 | 1.47 | 53   | 0    | grey  | TSPY-like 4                                                                             |
| Zfp354a                                       | NM_052798          | 10733310 | 0.15 | -128 | 0    | grey  | zinc finger protein 354A                                                                |
| Zfyve9                                        | NM_001107952       | 10878653 | 0.79 | -34  | 0    | grey  | zinc finger, FYVE domain containing 9                                                   |
| <b>TRANSLATION &amp; PROTEIN MODIFICATION</b> |                    |          |      |      |      |       |                                                                                         |
| Arl4d                                         | NM_001107052       | 10738477 | 1.25 | 23   | 8.7  | brwn  | ADP-ribosylation factor-like 4D                                                         |
| Ell                                           | NM_001107304       | 10790978 | 1.26 | 27   | 8.8  | brwn  | elongation factor RNA polymerase II                                                     |
| LOC100362277                                  | XM_002728612       | 10808893 | 1.33 | 17   | 0    | grey  | 60S ribosomal protein L29-like                                                          |
| Prpf3                                         | NM_001108559       | 10825074 | 0.79 | -18  | 0    | grey  | PRP3 pre-mRNA processing factor 3 homolog (S. cerevisiae)                               |
| Slfn2                                         | NM_001107031       | 10736795 | 1.37 | 34   | 0    | grey  | schlafen 2                                                                              |
| Slfn3                                         | NM_053687          | 10736802 | 1.56 | 11   | 0    | grey  | schlafen 3                                                                              |
| Slfn8                                         | NM_001013970       | 10745595 | 1.48 | 14   | 13.8 | brwn  | schlafen 8                                                                              |
| Taf8                                          | NM_001108197       | 10921447 | 0.76 | -77  | 0    | grey  | TAF8 RNA polymerase II, TATA box binding protein (TBP)-associated factor                |
| <b>MISCELLANEOUS &amp; UNKNOWN</b>            |                    |          |      |      |      |       |                                                                                         |
| Depdc5                                        | NM_001107229       | 10777832 | 0.79 | -26  | 8.0  | ylw   | DEP domain containing 5                                                                 |
| Fam105a                                       | BC107649           | 10822107 | 1.28 | 18   | 11.4 | turq  | family with sequence similarity 105, member A                                           |
| Fam118b                                       | BC098017           | 10916052 | 0.73 | -33  | 3.6  | brwn  | family with sequence similarity 118, member B                                           |
| Fam50a                                        | NM_001170573       | 10940358 | 0.75 | -36  | 0    | grey  | family with sequence similarity 50, member A                                            |
| Fam82b                                        | NM_001031663       | 10867799 | 0.78 | -38  | 0    | grey  | family with sequence similarity 82, member B                                            |
| LOC100359529                                  | ENSRNOT00000041624 | 10884408 | 0.83 | -13  | 0    | grey  | rCG61688-like                                                                           |
| LOC100362431                                  | ENSRNOT00000013565 | 10846299 | 1.36 | 19   | 3.3  | blue  | tetratricopeptide repeat domain 30B                                                     |
| LOC500300                                     | NM_001024334       | 10858160 | 0.47 | -41  | 0    | grey  | similar to hypothetical protein MGC6835                                                 |
| R3hdm1                                        | NM_001134867       | 10763654 | 0.79 | -41  | 1.4  | ylw   | R3H domain containing 1                                                                 |

|                 |                     |                 |             |            |             |             |                                                                      |
|-----------------|---------------------|-----------------|-------------|------------|-------------|-------------|----------------------------------------------------------------------|
| RGD1311422      | ENSRNOT00000004718  | 10808094        | 1.38        | 22         | 9.6         | blue        | similar to CG8841-PA                                                 |
| Sgtb            | NM_181629           | 10812798        | 0.71        | -15        | 0           | grey        | small glutamine-rich tetratricopeptide repeat (TPR)-containing, beta |
| Tmem109         | NM_001007736        | 10728812        | 1.23        | 16         | 0           | grey        | transmembrane protein 109                                            |
| Tmem43          | NM_001007745        | 10857296        | 1.20        | 27         | 12.8        | brwn        | transmembrane protein 43                                             |
| <b>Tmtc4</b>    | <b>NM_001134414</b> | <b>10786042</b> | <b>0.83</b> | <b>-21</b> | <b>24.9</b> | <b>brwn</b> | <b>transmembrane and tetratricopeptide repeat containing 4</b>       |
| <b>Traf3ip3</b> | <b>NM_001014132</b> | <b>10766806</b> | <b>0.80</b> | <b>-16</b> | <b>23.8</b> | <b>brwn</b> | <b>TRAF3 interacting protein 3</b>                                   |
| EST's           |                     |                 |             |            |             |             |                                                                      |
| RGD1304827      | ENSRNOT00000037460  | 10914409        | 0.81        | -55        | 11.9        | ylw         | hypothetical LOC316091                                               |
| RGD1310185      | ENSRNOT00000032301  | 10785361        | 1.39        | 17         | 2.1         | turq        | similar to RIKEN cDNA 9030625A04                                     |
| RGD1565616      | NM_001109206        | 10849967        | 1.26        | 52         | 17.3        | brwn        | RGD1565616                                                           |
|                 | <b>NC_001665</b>    | <b>10930555</b> | <b>2.24</b> | <b>220</b> | <b>4.8</b>  | <b>mgnt</b> |                                                                      |
|                 | FQ213782            | 10866535        | 1.25        | 10         | 0           | grey        |                                                                      |
|                 | FQ212254            | 10838352        | 0.77        | -56        | 3.7         | brwn        |                                                                      |
|                 | FQ210125            | 10840653        | 0.70        | -60        | 8.3         | blue        |                                                                      |
|                 | ENSRNOT00000060917  | 10932310        | 0.79        | -12        | 0           | grey        |                                                                      |
|                 | ENSRNOT00000052679  | 10903965        | 1.22        | 12         | 3.5         | blue        |                                                                      |
|                 | ENSRNOT00000050793  | 10936475        | 0.81        | -102       | 2.9         | blue        |                                                                      |
|                 | ENSRNOT00000046708  | 10719104        | 0.77        | -10        | 3.8         | turq        |                                                                      |
|                 | ENSRNOT00000043345  | 10913501        | 0.71        | -12        | 8.8         | turq        |                                                                      |
|                 | ENSRNOT00000034355  | 10920991        | 0.81        | -12        | 0           | grey        |                                                                      |
|                 | ENSRNOT00000024963  | 10714973        | 0.80        | -21        | 0.8         | turq        |                                                                      |
|                 | ENSRNOT00000024698  | 10710166        | 0.82        | -28        | 0.9         | ylw         |                                                                      |
|                 | ENSRNOT00000017688  | 10716679        | 1.32        | 40         | 17.7        | brwn        |                                                                      |
|                 | ENSRNOT00000002991  | 10772330        | 1.21        | 12         | 0.4         | brwn        |                                                                      |
|                 | ---                 | 10864838        | 0.79        | -20        | 0           | grey        |                                                                      |
|                 | ---                 | 10821585        | 1.39        | 25         | 0           | grey        |                                                                      |
|                 | ---                 | 10701507        | 0.65        | -35        | 10.4        | blue        |                                                                      |
|                 | ---                 | 10701445        | 0.58        | -49        | 3.0         | brwn        |                                                                      |
|                 | ---                 | 10701618        | 0.83        | -63        | 0           | grey        |                                                                      |
|                 | ---                 | 10700196        | 0.61        | -43        | 0           | grey        |                                                                      |
|                 | ---                 | 10700919        | 0.69        | -30        | 0           | grey        |                                                                      |
|                 | ---                 | 10700282        | 0.45        | -25        | 0           | grey        |                                                                      |
|                 | ---                 | 10700614        | 0.70        | -15        | 0           | grey        |                                                                      |
|                 | ---                 | 10701347        | 0.48        | -14        | 0           | grey        |                                                                      |
|                 | ---                 | 10700194        | 1.38        | 10         | 0           | grey        |                                                                      |
|                 | ---                 | 10701494        | 1.58        | 11         | 0           | grey        |                                                                      |
|                 | ---                 | 10700779        | 1.51        | 16         | 0           | grey        |                                                                      |
|                 | ---                 | 10700257        | 1.62        | 17         | 0           | grey        |                                                                      |
|                 | ---                 | 10701137        | 1.32        | 17         | 0           | grey        |                                                                      |
|                 | ---                 | 10701596        | 1.62        | 19         | 0           | grey        |                                                                      |
|                 | ---                 | 10701532        | 1.44        | 27         | 0           | grey        |                                                                      |
|                 | ---                 | 10700103        | 2.40        | 39         | 0           | grey        |                                                                      |
|                 | ---                 | 10700445        | 1.24        | 44         | 0           | grey        |                                                                      |
|                 | ---                 | 10700356        | 1.23        | 14         | 0.2         | mgnt        |                                                                      |
|                 | ---                 | 10701313        | 0.79        | -147       | 27.8        | turq        |                                                                      |
|                 | ---                 | 10701568        | 0.75        | -35        | 22.0        | turq        |                                                                      |
|                 | ---                 | 10700101        | 0.66        | -77        | 13.4        | turq        |                                                                      |
|                 | ---                 | 10701269        | 1.22        | 77         | 2.7         | turq        |                                                                      |
|                 | ---                 | 10701017        | 0.59        | -50        | 2.6         | turq        |                                                                      |
|                 | ---                 | 10700573        | 1.76        | 64         | 1.0         | turq        |                                                                      |
|                 | ---                 | 10700858        | 1.59        | 82         | 6.9         | ylw         |                                                                      |
|                 | ---                 | 10701057        | 0.65        | -10        | 1.1         | ylw         |                                                                      |
|                 | ---                 | 10701185        | 0.63        | -15        | 0.7         | ylw         |                                                                      |

#### I. Prostate

| Gene Symbol      | RefSeq/GenBank/<br>Ensemble Number | Affymetrix<br>Probset ID | V/C  | Mean<br>Diff. | k.in | Mod  | Gene Title                                                |
|------------------|------------------------------------|--------------------------|------|---------------|------|------|-----------------------------------------------------------|
| <b>APOPTOSIS</b> |                                    |                          |      |               |      |      |                                                           |
| Atg7             | NM_001012097                       | 10857950                 | 0.71 | -45           | 31.6 | turq | ATG7 autophagy related 7 homolog (S. cerevisiae)          |
| Bmf              | NM_139258                          | 10848444                 | 0.49 | -33           | 4.7  | brwn | Bcl2 modifying factor                                     |
| Bok              | NM_017312                          | 10925636                 | 1.30 | 15            | 1.1  | turq | BCL2-related ovarian killer                               |
| Casp1            | NM_012762                          | 10907815                 | 2.19 | 96            | 22.9 | turq | caspase 1                                                 |
| Casp7            | NM_022260                          | 10716226                 | 0.61 | -41           | 23.8 | turq | caspase 7                                                 |
| Dffa             | NM_053679                          | 10874070                 | 0.55 | -30           | 12.1 | turq | DNA fragmentation factor, alpha subunit                   |
| Lsp1             | NM_001025420                       | 10712477                 | 2.31 | 120           | 5.7  | brwn | lymphocyte-specific protein 1                             |
| Pdcd6ip          | NM_001029910                       | 10920632                 | 0.61 | -421          | 6.9  | turq | programmed cell death 6 interacting protein (chr8)        |
| Pdcd6ip          | NM_001029910                       | 10921190                 | 0.71 | -36           | 12.6 | turq | programmed cell death 6 interacting protein (chr8_random) |
| Syvn1            | NM_001100739                       | 10713160                 | 0.41 | -135          | 16.8 | turq | synovial apoptosis inhibitor 1, synoviolin                |

|                         |                    |                 |             |             |             |             |                                                                                          |
|-------------------------|--------------------|-----------------|-------------|-------------|-------------|-------------|------------------------------------------------------------------------------------------|
| Tfg                     | NM_001012144       | 10750781        | 0.65        | -325        | 24.8        | turq        | Trk-fused gene                                                                           |
| <b>Tmbim6</b>           | <b>NM_019381</b>   | <b>10899125</b> | <b>0.78</b> | <b>-491</b> | <b>40.1</b> | <b>turq</b> | <b>transmembrane BAX inhibitor motif containing 6</b>                                    |
| Tnfsf10                 | NM_145681          | 10814528        | 2.32        | 101         | 4.8         | brwn        | tumor necrosis factor (ligand) superfamily, member 10                                    |
| <b>CELL CYCLE</b>       |                    |                 |             |             |             |             |                                                                                          |
| Anapc7                  | NM_001107142       | 10762009        | 0.69        | -66         | 19.7        | turq        | anaphase promoting complex subunit 7                                                     |
| Bop1                    | NM_001024250       | 10904930        | 0.52        | -71         | 24.2        | turq        | block of proliferation 1                                                                 |
| Cables2                 | ENSRNOT00000008279 | 10852351        | 0.55        | -26         | 21.2        | turq        | Cdk5 and Abl enzyme substrate 2                                                          |
| Ccnd1                   | NM_171992          | 10727260        | 0.53        | -221        | 8.8         | turq        | cyclin D1                                                                                |
| Ccnj                    | NM_001106369       | 10715301        | 0.61        | -25         | 0           | grey        | cyclin J                                                                                 |
| Ccnl1                   | NM_053662          | 10823508        | 1.62        | 147         | 22.3        | blue        | cyclin L1                                                                                |
| Cdc26                   | NM_001013240       | 10877411        | 1.60        | 139         | 26.0        | turq        | cell division cycle 26                                                                   |
| Cdk6                    | NM_001191861       | 10860765        | 0.55        | -135        | 18.8        | turq        | cyclin-dependent kinase 6                                                                |
| Cdkn1a                  | NM_080782          | 10828827        | 0.54        | -68         | 29.4        | turq        | cyclin-dependent kinase inhibitor 1A                                                     |
| Cnm2                    | NM_001011942       | 10715889        | 0.38        | -106        | 16.4        | turq        | cyclin M2                                                                                |
| Cnm4                    | ENSRNOT00000021434 | 10922553        | 0.68        | -40         | 13.6        | turq        | cyclin M4                                                                                |
| Ddit3                   | NM_001109986       | 10895861        | 1.58        | 46          | 0           | grey        | DNA-damage inducible transcript 3                                                        |
| Ddit4                   | NM_080906          | 10832920        | 0.45        | -69         | 14.2        | blue        | DNA-damage-inducible transcript 4                                                        |
| Gak                     | NM_031030          | 10770948        | 0.66        | -88         | 11.8        | turq        | cyclin G associated kinase                                                               |
| Gas2l1                  | NM_001108365       | 10778146        | 0.70        | -23         | 32.4        | turq        | growth arrest-specific 2 like 1                                                          |
| Orc5l                   | NM_001014186       | 10853004        | 1.47        | 113         | 13.9        | turq        | origin recognition complex, subunit 5-like (yeast)                                       |
| <b>CYTOSKELETON-ECM</b> |                    |                 |             |             |             |             |                                                                                          |
| Adrm1                   | NM_031708          | 10842795        | 0.73        | -85         | 20.1        | turq        | adhesion regulating molecule 1                                                           |
| Cap1                    | NM_022383          | 10879502        | 0.83        | -174        | 0           | grey        | CAP, adenylate cyclase-associated protein 1 (yeast)                                      |
| Ckap4                   | NM_001108740       | 10894549        | 0.56        | -24         | 0           | grey        | cytoskeleton-associated protein 4                                                        |
| Clec4a3                 | NM_001005891       | 10858559        | 1.71        | 74          | 19.8        | turq        | C-type lectin domain family 4, member a3                                                 |
| Clecsf6                 | NM_001005899       | 10858573        | 1.75        | 22          | 11.8        | turq        | C-type (calcium dependent, carbohydrate recognition domain) lectin, superfamily member 6 |
| Cltc                    | NM_019299          | 10745940        | 0.80        | -390        | 3.9         | turq        | clathrin, heavy chain (Hc)                                                               |
| Copz1                   | NM_001108117       | 10899633        | 0.79        | -136        | 10.9        | turq        | coatamer protein complex, subunit zeta 1                                                 |
| Dcn                     | NM_024129          | 10895075        | 1.73        | 555         | 10.2        | turq        | decorin                                                                                  |
| Dnm2                    | NM_013199          | 10908427        | 0.67        | -99         | 33.7        | turq        | dynamin 2                                                                                |
| Dsg2                    | ENSRNOT00000022270 | 10800410        | 0.35        | -111        | 20.1        | turq        | desmoglein 2                                                                             |
| Dync1li1                | NM_145772          | 10913995        | 0.70        | -129        | 16.8        | turq        | dynein cytoplasmic 1 light intermediate chain 1                                          |
| Eml4                    | NM_001108008       | 10882543        | 0.69        | -102        | 6.0         | turq        | echinoderm microtubule associated protein like 4                                         |
| Epn3                    | NM_001024791       | 10746387        | 0.28        | -49         | 17.3        | turq        | epsin 3                                                                                  |
| F11r                    | NM_053796          | 10765600        | 0.36        | -311        | 15.3        | turq        | F11 receptor                                                                             |
| Fxc1                    | NM_053371          | 10833834        | 0.56        | -15         | 0           | grey        | fractured callus expressed transcript 1                                                  |
| Gjb2                    | NM_001004099       | 10784117        | 0.71        | -11         | 5.7         | brwn        | gap junction protein, beta 2                                                             |
| Gsn                     | ENSRNOT00000025919 | 10835775        | 0.59        | -19         | 11.2        | turq        | gelsolin                                                                                 |
| Inadl2                  | ENSRNOT00000010211 | 10870046        | 0.48        | -72         | 17.6        | turq        | InaD-like 2 (Drosophila)                                                                 |
| <b>Jup</b>              | <b>NM_031047</b>   | <b>10747330</b> | <b>0.62</b> | <b>-133</b> | <b>53.4</b> | <b>turq</b> | <b>junction plakoglobin</b>                                                              |
| Kif1b                   | NM_057200          | 10881685        | 0.67        | -145        | 31.1        | turq        | kinesin family member 1B                                                                 |
| Krtap9-1                | ENSRNOT00000044342 | 10738152        | 1.31        | 11          | 11.9        | blue        | keratin associated protein 9-1                                                           |
| Lad1                    | NM_001107942       | 10764240        | 0.31        | -80         | 0           | grey        | ladinin 1                                                                                |
| Lama5                   | NM_001191609       | 10852270        | 0.40        | -32         | 12.9        | turq        | laminin, alpha 5                                                                         |
| Lamc2                   | NM_001100640       | 10768642        | 0.20        | -44         | 2.41        | green       | laminin, gamma 2                                                                         |
| Lenep                   | NM_053614          | 10824502        | 0.68        | -28         | 19.8        | turq        | lens epithelial protein                                                                  |
| Lgals8                  | NM_053862          | 10795724        | 1.75        | 198         | 9.4         | turq        | lectin, galactoside-binding, soluble, 8                                                  |
| Map1lc3a                | NM_199500          | 10841333        | 0.79        | -25         | 6.5         | turq        | microtubule-associated protein 1 light chain 3 alpha                                     |
| Mapt                    | NM_017212          | 10738744        | 1.31        | 17          | 4.6         | ylw         | microtubule-associated protein tau                                                       |
| Mtm1                    | NM_001013047       | 10892884        | 0.81        | -85         | 3.6         | turq        | myotubularin 1                                                                           |
| Mtmr15                  | NM_001191633       | 10722552        | 0.70        | -11         | 14.5        | turq        | myotubularin related protein 15                                                          |
| Myh14                   | NM_001100690       | 10721433        | 0.44        | -40         | 21.3        | turq        | myosin, heavy chain 14                                                                   |
| Myo1d                   | NM_012983          | 10745509        | 0.48        | -243        | 6.8         | turq        | myosin ID                                                                                |
| Myo5b                   | NM_017083          | 10802650        | 0.48        | -90         | 10.5        | turq        | myosin Vb                                                                                |
| Myo6                    | ENSRNOT00000016428 | 10911882        | 0.58        | -130        | 4.9         | turq        | myosin VI                                                                                |
| Ociad1                  | NM_001013874       | 10776566        | 0.78        | -352        | 26.8        | turq        | OClA domain containing 1                                                                 |
| Pcdh10                  | ENSRNOT00000067470 | 10815200        | 0.05        | -100        | 0           | grey        | protocadherin 10                                                                         |
| Pdlim5                  | NM_053326          | 10827079        | 0.58        | -174        | 14.3        | turq        | PDZ and LIM domain 5                                                                     |
| Pfn3                    | NM_001109487       | 10797256        | 0.80        | -11         | 0           | grey        | profilin 3                                                                               |
| Plec                    | NM_001164304       | 10904812        | 0.74        | -47         | 24.7        | turq        | plectin                                                                                  |
| <b>Plp2</b>             | <b>NM_207601</b>   | <b>10932534</b> | <b>0.52</b> | <b>-233</b> | <b>38.4</b> | <b>turq</b> | <b>proteolipid protein 2 (colonic epithelium-enriched)</b>                               |
| Pxn                     | NM_001012147       | 10762665        | 0.73        | -70         | 11.3        | turq        | paxillin                                                                                 |
| Scin                    | NM_198748          | 10889731        | 0.57        | -31         | 0           | grey        | scinderin                                                                                |
| Spire1                  | NM_001107381       | 10804993        | 0.54        | -86         | 8.3         | turq        | spire homolog 1 (Drosophila)                                                             |
| Tecr                    | NM_138549          | 10806855        | 0.59        | -1124       | 37.2        | turq        | trans-2,3-enoyl-CoA reductase                                                            |
| Till12                  | NM_001135922       | 10905827        | 0.50        | -42         | 13.3        | turq        | tubulin tyrosine ligase-like family, member 12                                           |
| Unc84a                  | NM_001007147       | 10760687        | 0.82        | -51         | 20.2        | turq        | unc-84 homolog A (C. elegans)                                                            |
| Zfc3h1                  | ENSRNOT00000058444 | 10895458        | 1.52        | 113         | 8.0         | blue        | zinc finger, C3H1-type containing                                                        |

| DEVELOPMENT   |                           |                 |             |             |             |             |                                                                                                                  |
|---------------|---------------------------|-----------------|-------------|-------------|-------------|-------------|------------------------------------------------------------------------------------------------------------------|
| Aamp          | NM_001106920              | 10928890        | 0.70        | -137        | 18.4        | turq        | angio-associated, migratory cell protein                                                                         |
| Adnp2         | NM_001127373              | 10805382        | 0.74        | -32         | 5.7         | turq        | ADNP homeobox 2                                                                                                  |
| Aim1          | ENSRNOT00000037448        | 10833849        | 0.51        | -47         | 21.6        | turq        | absent in melanoma 1                                                                                             |
| Aph1b         | NM_001047090              | 10918368        | 0.71        | -52         | 8.2         | turq        | anterior pharynx defective 1 homolog B (C. elegans)                                                              |
| Atxn7         | ENSRNOT00000010103        | 10782564        | 0.69        | -57         | 16.3        | turq        | ataxin 7                                                                                                         |
| Cdc42se2      | NM_001126089              | 10742674        | 0.65        | -162        | 4.90        | green       | CDC42 small effector 2                                                                                           |
| <b>Clptm1</b> | <b>NM_001106232</b>       | <b>10719501</b> | <b>0.53</b> | <b>-746</b> | <b>42.6</b> | <b>turq</b> | <b>cleft lip and palate associated transmembrane protein 1</b>                                                   |
| Cops6         | NM_001107129              | 10757211        | 0.82        | -101        | 7.2         | turq        | COP9 constitutive photomorphogenic homolog subunit 6 (Arabidopsis)                                               |
| Cops7b        | NM_001108807              | 10924924        | 0.74        | -12         | 2.2         | turq        | COP9 constitutive photomorphogenic homolog subunit 7B (Arabidopsis)                                              |
| Dach2         | ENSRNOT00000006907        | 10934737        | 0.32        | -43         | 8.9         | brwn        | dachshund homolog 2 (Drosophila)                                                                                 |
| Dcbl1         | ENSRNOT00000000462        | 10830135        | 0.57        | -35         | 4.9         | turq        | discoidin, CUB and LCCL domain containing 1                                                                      |
| <b>Ddb1</b>   | <b>ENSRNOT00000028188</b> | <b>10713915</b> | <b>0.63</b> | <b>-454</b> | <b>47.3</b> | <b>turq</b> | <b>damage-specific DNA binding protein 1</b>                                                                     |
| Dip2b         | ENSRNOT00000026289        | 10899209        | 0.54        | -76         | 28.4        | turq        | DIP2 disco-interacting protein 2 homolog B (Drosophila)                                                          |
| Dnajb12       | NM_001013907              | 10829944        | 0.64        | -102        | 33.5        | turq        | DnaJ (Hsp40) homolog, subfamily B, member 12 (chr20)                                                             |
| Dnajb12       | NM_001013907              | 10931089        | 0.64        | -102        | 33.5        | turq        | DnaJ (Hsp40) homolog, subfamily B, member 12 (chrUn)                                                             |
| Dopey2        | NM_001191660              | 10750333        | 0.48        | -55         | 27.5        | turq        | dopey family member 2                                                                                            |
| Dpy19l3       | NM_001135835              | 10721126        | 0.50        | -94         | 14.3        | turq        | dpy-19-like 3 (C. elegans)                                                                                       |
| Efr3a         | NM_001130564              | 10896836        | 0.81        | -182        | 0           | grey        | EFR3 homolog A (S. cerevisiae)                                                                                   |
| Etl4          | ENSRNOT00000057655        | 10796683        | 0.52        | -69         | 34.8        | turq        | enhancer trap locus 4                                                                                            |
| Fkrp          | NM_001025678              | 10719291        | 0.67        | -11         | 13.2        | turq        | fukutin related protein                                                                                          |
| Fln           | NM_199390                 | 10743171        | 0.66        | -77         | 12.7        | turq        | folliculin                                                                                                       |
| Fxr2          | NM_001100647              | 10734994        | 0.76        | -88         | 26.1        | turq        | fragile X mental retardation, autosomal homolog 2                                                                |
| Gmfg          | NM_181091                 | 10705539        | 1.41        | 74          | 8.0         | turq        | glia maturation factor, gamma                                                                                    |
| Harbi1l       | ENSRNOT00000023237        | 10847410        | 0.61        | -245        | 36.9        | turq        | harbinger transposase derived 1-like                                                                             |
| Hbs1l         | NM_001011934              | 10702049        | 0.75        | -255        | 18.6        | turq        | Hbs1-like (S. cerevisiae)                                                                                        |
| Hps1          | NM_040669                 | 10715377        | 0.53        | -43         | 17.5        | turq        | Hermansky-Pudlak syndrome 1 homolog (human)                                                                      |
| Hps3          | NM_001107664              | 10822463        | 1.40        | 34          | 5.9         | turq        | Hermansky-Pudlak syndrome 3 homolog (human)                                                                      |
| Hps6          | NM_181432                 | 10715704        | 0.60        | -14         | 7.1         | turq        | Hermansky-Pudlak syndrome 6                                                                                      |
| Htt           | NM_024357                 | 10777571        | 0.69        | -42         | 11.3        | turq        | huntingtin                                                                                                       |
| Irx2          | NM_001039505              | 10796845        | 0.53        | -23         | 8.0         | turq        | iroquois homeobox 2                                                                                              |
| Irx5          | NM_001030044              | 10809563        | 0.64        | -17         | 24.6        | turq        | iroquois homeobox 5                                                                                              |
| Lmtk2         | NM_001137641              | 10760307        | 0.49        | -239        | 34.9        | turq        | lemur tyrosine kinase 2                                                                                          |
| LOC100365604  | ENSRNOT00000009779        | 10883651        | 0.70        | -62         | 8.3         | turq        | neuroblastoma-amplified protein-like                                                                             |
| LOC680155     | ENSRNOT00000020271        | 10786359        | 1.31        | 129         | 24.9        | turq        | hypothetical protein LOC680155                                                                                   |
| LOC687620     | ENSRNOT00000012282        | 10884701        | 1.58        | 42          | 2.0         | turq        | similar to mirror-image polydactyly 1                                                                            |
| Lpin3         | NM_001014184              | 10841888        | 0.58        | -49         | 16.9        | turq        | lipin 3                                                                                                          |
| Lrrc41        | NM_001009710              | 10878822        | 0.67        | -131        | 20.6        | turq        | leucine rich repeat containing 41                                                                                |
| Lrrc47        | NM_001135666              | 10874450        | 0.50        | -68         | 30.0        | turq        | leucine rich repeat containing 47                                                                                |
| Lrrc59        | NM_001008280              | 10737518        | 0.80        | -103        | 30.6        | turq        | leucine rich repeat containing 59                                                                                |
| Lrrn2         | NM_001177368              | 10763933        | 0.20        | -37         | 5.1         | turq        | leucine rich repeat neuronal 2                                                                                   |
| Mmachc        | NM_001107962              | 10878905        | 0.62        | -178        | 30.9        | turq        | methylmalonic aciduria (cobalamin deficiency) cb1C type, with homocystinuria                                     |
| Napa          | NM_080585                 | 10704413        | 0.60        | -290        | 37.6        | turq        | N-ethylmaleimide-sensitive factor attachment protein, alpha                                                      |
| Nbn           | NM_138873                 | 10867743        | 1.20        | 44          | 0           | grey        | nibrin                                                                                                           |
| Ncf2          | NM_001100984              | 10764722        | 1.80        | 12          | 2.0         | turq        | neutrophil cytosolic factor 2                                                                                    |
| Ncf4          | NM_001127304              | 10897419        | 1.68        | 15          | 8.6         | brwn        | neutrophil cytosolic factor 4                                                                                    |
| Neu1          | NM_031522                 | 10831300        | 0.71        | -65         | 0           | grey        | sialidase 1 (lysosomal sialidase)                                                                                |
| Neu3          | NM_054010                 | 10723922        | 0.41        | -25         | 17.2        | turq        | sialidase 3 (membrane sialidase)                                                                                 |
| Nipal2        | NM_001130559              | 10903234        | 0.38        | -133        | 28.6        | turq        | NIPA-like domain containing 2                                                                                    |
| Nipal3        | ENSRNOT00000068004        | 10880617        | 0.56        | -29         | 20.2        | turq        | NIPA-like domain containing 3                                                                                    |
| <b>Nomo1</b>  | <b>NM_001108484</b>       | <b>10707019</b> | <b>0.37</b> | <b>-302</b> | <b>46.7</b> | <b>turq</b> | <b>nodal modulator 1</b>                                                                                         |
| Nsf           | NM_021748                 | 10748118        | 0.59        | -71         | 20.6        | turq        | N-ethylmaleimide-sensitive factor                                                                                |
| Optn          | NM_145081                 | 10796326        | 0.70        | -87         | 10.2        | turq        | optineurin                                                                                                       |
| Park7         | NM_057143                 | 10881850        | 0.78        | -404        | 14.2        | brwn        | Parkinson disease (autosomal recessive, early onset) 7                                                           |
| Per2          | NM_031678                 | 10929842        | 0.63        | -23         | 1.6         | turq        | period homolog 2 (Drosophila)                                                                                    |
| Pnkd          | NM_001134750              | 10924260        | 0.67        | -43         | 28.2        | turq        | paroxysmal nonkinesinogenic dyskinesia                                                                           |
| Popdc2        | NM_199113                 | 10754179        | 0.55        | -39         | 1.49        | green       | popeye domain containing 2                                                                                       |
| <b>Ptov1</b>  | <b>NM_001008304</b>       | <b>10721504</b> | <b>0.54</b> | <b>-67</b>  | <b>40.6</b> | <b>turq</b> | <b>prostate tumor overexpressed 1</b>                                                                            |
| RGD1303130    | NM_001004226              | 10816500        | 0.49        | -246        | 30.3        | turq        | kidney predominant protein NCU-G1                                                                                |
| <b>Scrib</b>  | <b>NM_001191879</b>       | <b>10904714</b> | <b>0.65</b> | <b>-42</b>  | <b>38.8</b> | <b>turq</b> | <b>scribbled homolog (Drosophila)</b>                                                                            |
| Sema4a        | NM_001012078              | 10824305        | 0.65        | -52         | 5.4         | turq        | sema domain, immunoglobulin domain (Ig), transmembrane domain (TM) and short cytoplasmic domain, (semaphorin) 4A |
| Sema4c        | NM_001106902              | 10927379        | 0.36        | -34         | 12.9        | turq        | sema domain, immunoglobulin domain (Ig), transmembrane domain (TM) and short cytoplasmic domain, (semaphorin) 4C |
| Sema4d        | NM_001170563              | 10794242        | 0.37        | -69         | 26.4        | turq        | sema domain, immunoglobulin domain (Ig), transmembrane domain (TM) and short cytoplasmic domain, (semaphorin) 4D |
| Sipa1l3       | ENSRNOT00000038929        | 10720510        | 0.44        | -38         | 10.6        | turq        | signal-induced proliferation-associated 1 like 3                                                                 |
| Spata13       | NM_001191686              | 10780873        | 0.67        | -15         | 4.1         | turq        | spermatogenesis associated 13                                                                                    |
| Surf4         | NM_001033868              | 10843893        | 0.63        | -367        | 20.6        | turq        | surfeit 4                                                                                                        |

|                           |                           |                 |             |             |             |             |                                                                                                   |
|---------------------------|---------------------------|-----------------|-------------|-------------|-------------|-------------|---------------------------------------------------------------------------------------------------|
| Surf6                     | NM_001015014              | 10742324        | 0.66        | -35         | 0           | grey        | surfeit 6                                                                                         |
| Syn1                      | NM_019133                 | 10932107        | 0.45        | -12         | 0           | grey        | synapsin I                                                                                        |
| Tor1aip2                  | NM_199100                 | 10764827        | 0.82        | -58         | 10.2        | turq        | torsin A interacting protein 2                                                                    |
| Trmt2a                    | NM_001011895              | 10755604        | 0.65        | -35         | 0           | grey        | TRM2 tRNA methyltransferase 2 homolog A ( <i>S. cerevisiae</i> )                                  |
| <b>Trpc4ap</b>            | <b>NM_001100748</b>       | <b>10851056</b> | <b>0.68</b> | <b>-222</b> | <b>55.6</b> | <b>turq</b> | <b>transient receptor potential cation channel, subfamily C, member 4 associated protein</b>      |
| Trpm4                     | NM_001136229              | 10721739        | 0.50        | -30         | 35.6        | turq        | transient receptor potential cation channel, subfamily M, member 4                                |
| Uhmk1                     | NM_017293                 | 10798469        | 0.67        | -291        | 24.4        | turq        | U2AF homology motif (UHM) kinase 1                                                                |
| Ulk1                      | NM_001108341              | 10759248        | 0.65        | -40         | 24.6        | turq        | Unc-51 like kinase 1 ( <i>C. elegans</i> )                                                        |
| Ulk3                      | ENSRNOT00000025885        | 10910360        | 0.71        | -10         | 0           | grey        | unc-51-like kinase 3 ( <i>C. elegans</i> )                                                        |
| Wfs1                      | NM_031823                 | 10773290        | 0.50        | -70         | 18.9        | turq        | Wolfram syndrome 1 homolog (human)                                                                |
| Yif1b                     | NM_198734                 | 10705739        | 0.77        | -30         | 5.4         | brwn        | Yip1 interacting factor homolog B ( <i>S. cerevisiae</i> )                                        |
| <b>DNA REPAIR</b>         |                           |                 |             |             |             |             |                                                                                                   |
| Atmin                     | NM_001191786              | 10808218        | 0.69        | -25         | 14.4        | turq        | ATM interactor (chr19)                                                                            |
| Atmin                     | NM_001191786              | 10903264        | 0.63        | -35         | 18.0        | turq        | ATM interactor (chr7)                                                                             |
| Bcr                       | ENSRNOT00000001766        | 10832602        | 0.42        | -77         | 31.6        | turq        | breakpoint cluster region                                                                         |
| Cry1                      | NM_198750                 | 10894525        | 0.64        | -20         | 10.3        | turq        | cryptochrome 1 (photolyase-like)                                                                  |
| Cry2                      | NM_133405                 | 10847525        | 0.58        | -144        | 14.4        | turq        | cryptochrome 2 (photolyase-like)                                                                  |
| Dcaf10                    | NM_001107935              | 10868718        | 0.66        | -58         | 9.6         | turq        | DDB1 and CUL4 associated factor 10                                                                |
| Dclre1b                   | NM_001025687              | 10825602        | 0.70        | -34         | 4.5         | turq        | DNA cross-link repair 1B, PSO2 homolog ( <i>S. cerevisiae</i> )                                   |
| Rad54l2                   | NM_001134520              | 10919967        | 0.45        | -157        | 11.8        | turq        | Rad54 like 2 ( <i>S. cerevisiae</i> )                                                             |
| Tp53bp2                   | ENSRNOT00000004330        | 10766382        | 0.43        | -68         | 15.0        | turq        | tumor protein p53 binding protein, 2                                                              |
| <b>ELECTRON TRANSPORT</b> |                           |                 |             |             |             |             |                                                                                                   |
| Cyb5r1                    | NM_001013126              | 10764104        | 0.59        | -99         | 27.7        | turq        | cytochrome b5 reductase 1                                                                         |
| Prdx4                     | NM_053512                 | 10933699        | 1.22        | 31          | 7.4         | turq        | peroxiredoxin 4                                                                                   |
| Txndc11                   | NM_001127532              | 10731484        | 0.45        | -150        | 12.9        | turq        | thioredoxin domain containing 11                                                                  |
| Txndc12                   | NM_001100840              | 10870837        | 1.37        | 212         | 13.4        | turq        | thioredoxin domain containing 12 (endoplasmic reticulum)                                          |
| <b>Ucp2</b>               | <b>NM_019354</b>          | <b>10709093</b> | <b>0.45</b> | <b>-347</b> | <b>48.3</b> | <b>turq</b> | <b>uncoupling protein 2 (mitochondrial, proton carrier)</b>                                       |
| <b>EPIGENETICS</b>        |                           |                 |             |             |             |             |                                                                                                   |
| <b>Bahd1</b>              | <b>ENSRNOT00000013878</b> | <b>10838718</b> | <b>0.53</b> | <b>-35</b>  | <b>38.3</b> | <b>turq</b> | <b>bromo adjacent homology domain containing 1</b>                                                |
| Brd7                      | NM_001108440              | 10806323        | 0.75        | -88         | 4.4         | turq        | bromodomain containing 7                                                                          |
| Brwd2                     | ENSRNOT00000027704        | 10711463        | 0.77        | -68         | 8.6         | turq        | bromodomain and WD repeat domain containing 2                                                     |
| Cbx4                      | XM_576815                 | 10931644        | 0.48        | -34         | 15.1        | turq        | chromobox homolog 4 ( <i>Pc</i> class homolog, <i>Drosophila</i> )                                |
| Cxxc1                     | NM_001079698              | 10802603        | 0.73        | -37         | 13.7        | turq        | CXXC finger 1 (PHD domain)                                                                        |
| Erc1                      | NM_001106228              | 10704808        | 0.70        | -56         | 10.7        | turq        | excision repair cross-complementing rodent repair deficiency, complementation group 1             |
| Hist1h2bc                 | NM_001109400              | 10798475        | 0.50        | -22         | 0           | grey        | histone cluster 1, H2bc                                                                           |
| Jmjd5                     | NM_001037196              | 10710773        | 0.64        | -43         | 0           | grey        | jumonji domain containing 5                                                                       |
| Jmjd8                     | NM_001014116              | 10732511        | 0.75        | -152        | 26.2        | turq        | jumonji domain containing 8                                                                       |
| Mpg                       | NM_012601                 | 10741786        | 0.72        | -11         | 6.4         | brwn        | N-methylpurine-DNA glycosylase                                                                    |
| Phf1                      | NM_212538                 | 10828459        | 0.76        | -41         | 18.4        | turq        | PHD finger protein 1                                                                              |
| Phf20l1                   | NM_001025702              | 10896862        | 1.27        | 64          | 20.0        | blue        | PHD finger protein 20-like 1                                                                      |
| Pygo2                     | NM_001106447              | 10816805        | 0.65        | -14         | 0           | grey        | pygopus 2                                                                                         |
| Rcc2                      | ENSRNOT00000008940        | 10873567        | 0.54        | -121        | 31.9        | turq        | regulator of chromosome condensation 2                                                            |
| Setd8                     | ENSRNOT00000001407        | 10761727        | 0.64        | -204        | 8.7         | turq        | SET domain containing (lysine methyltransferase) 8                                                |
| Smarca4                   | NM_134368                 | 10908482        | 0.72        | -66         | 28.1        | turq        | SWI/SNF related, matrix associated, actin dependent regulator of chromatin, subfamily a, member 4 |
| Smarcal1                  | NM_001108222              | 10924199        | 0.77        | -29         | 10.5        | turq        | Swi/SNF related matrix associated, actin dependent regulator of chromatin, subfamily a-like 1     |
| Thap7                     | NM_001105863              | 10752451        | 0.62        | -18         | 12.2        | brwn        | THAP domain containing 7                                                                          |
| <b>Wdr5</b>               | <b>NM_001039034</b>       | <b>10834704</b> | <b>0.73</b> | <b>-62</b>  | <b>37.7</b> | <b>turq</b> | <b>WD repeat domain 5</b>                                                                         |
| <b>GOLGI APPARATUS</b>    |                           |                 |             |             |             |             |                                                                                                   |
| <b>Ergic1</b>             | <b>ENSRNOT00000005273</b> | <b>10741851</b> | <b>0.46</b> | <b>-345</b> | <b>51.2</b> | <b>turq</b> | <b>endoplasmic reticulum-golgi intermediate compartment (ERGIC) 1</b>                             |
| Ergic3                    | NM_001106533              | 10841452        | 0.67        | -296        | 9.1         | turq        | ERGIC and golgi 3                                                                                 |
| Ap1g1                     | NM_134460                 | 10807768        | 0.80        | -134        | 8.0         | turq        | adaptor-related protein complex 1, gamma 1 subunit                                                |
| Cog1                      | NM_001107062              | 10739371        | 0.75        | -43         | 31.0        | turq        | component of oligomeric golgi complex 1                                                           |
| <b>Cog7</b>               | <b>NM_001033889</b>       | <b>10725427</b> | <b>0.49</b> | <b>-56</b>  | <b>43.7</b> | <b>turq</b> | <b>component of oligomeric golgi complex 7</b>                                                    |
| Cog8                      | NM_001106182              | 10810839        | 0.66        | -52         | 15.6        | brwn        | component of oligomeric golgi complex 8                                                           |
| Copg                      | NM_001031822              | 10857080        | 0.54        | -259        | 32.2        | turq        | coatomer protein complex, subunit gamma                                                           |
| Golga3                    | NM_001107847              | 10763091        | 0.76        | -51         | 7.3         | turq        | golgi autoantigen, golgin subfamily a, 3 (chr12)                                                  |
| Golga3                    | NM_001107847              | 10860783        | 0.75        | -62         | 8.0         | turq        | golgi autoantigen, golgin subfamily a, 3 (chr4)                                                   |
| Golgb1                    | NM_138885                 | 10754311        | 0.74        | -37         | 1.8         | brwn        | golgi autoantigen, golgin subfamily b, macrogolgin 1                                              |
| Golph3                    | NM_023977                 | 10813771        | 0.81        | -266        | 11.2        | turq        | golgi phosphoprotein 3 (coat-protein)                                                             |
| <b>Goras2</b>             | <b>NM_001007720</b>       | <b>10836755</b> | <b>0.66</b> | <b>-394</b> | <b>45.5</b> | <b>turq</b> | <b>golgi reassembly stacking protein 2</b>                                                        |
| <b>LOC100360302</b>       | <b>ENSRNOT00000026111</b> | <b>10843761</b> | <b>0.54</b> | <b>-127</b> | <b>50.3</b> | <b>turq</b> | <b>SEC16 homolog A-like</b>                                                                       |
| Manba                     | NM_001031655              | 10819245        | 0.55        | -131        | 5.6         | turq        | mannosidase, beta A, lysosomal                                                                    |
| Mgat4a                    | NM_001160155              | 10927472        | 0.53        | -76         | 0           | grey        | mannosyl (alpha-1,3-)-glycoprotein beta-1,4-N-acetylglucosaminyltransferase, isozyme A            |



|                                   |                     |                 |             |              |             |             |                                                                                                  |
|-----------------------------------|---------------------|-----------------|-------------|--------------|-------------|-------------|--------------------------------------------------------------------------------------------------|
| Mgat4b                            | NM_001127533        | 10733225        | 0.53        | -83          | 36.7        | turq        | mannosyl (alpha-1,3-)-glycoprotein beta-1,4-N-acetylglucosaminyltransferase, isozyme B           |
| Mgat5                             | NM_023095           | 10763611        | 0.57        | -61          | 3.1         | turq        | mannosyl (alpha-1,6-)-glycoprotein beta-1,6-N-acetyl-glucosaminyltransferase                     |
| Pigs                              | <b>NM_001006602</b> | <b>10745081</b> | <b>0.45</b> | <b>-110</b>  | <b>56.6</b> | <b>turq</b> | <b>phosphatidylinositol glycan anchor biosynthesis, class S</b>                                  |
| Rpn2                              | <b>NM_031698</b>    | <b>10841602</b> | <b>0.50</b> | <b>-1306</b> | <b>77.4</b> | <b>turq</b> | <b>ribophorin II</b>                                                                             |
| Sec23ip                           | NM_001134859        | 10711433        | 0.74        | -119         | 15.3        | turq        | SEC23 interacting protein                                                                        |
| <b>GROWTH FACTORS</b>             |                     |                 |             |              |             |             |                                                                                                  |
| Sept7                             | NM_022616           | 10908674        | 1.39        | 111          | 15.6        | turq        | septin 7                                                                                         |
| Ccr2                              | NM_021866           | 10914614        | 3.70        | 107          | 13.3        | turq        | chemokine (C-C motif) receptor 2                                                                 |
| Ccr5                              | NM_053960           | 10914618        | 1.84        | 37           | 19.1        | turq        | chemokine (C-C motif) receptor 5                                                                 |
| Cetn3                             | NM_001191842        | 10812346        | 1.44        | 146          | 14.6        | turq        | centrin, EF-hand protein, 3 (CDC31 homolog, yeast)                                               |
| Ghitm                             | NM_001005908        | 10790585        | 1.45        | 917          | 0           | grey        | growth hormone inducible transmembrane protein                                                   |
| Igf2r                             | <b>NM_012756</b>    | <b>10702996</b> | <b>0.45</b> | <b>-307</b>  | <b>46.4</b> | <b>turq</b> | <b>insulin-like growth factor 2 receptor</b>                                                     |
| Jag2                              | ENSRNOT00000019213  | 10892352        | 0.67        | -12          | 1.8         | brwn        | jagged 2                                                                                         |
| RGD1305464                        | BC089935            | 10917748        | 0.59        | -19          | 2.9         | turq        | similar to human chromosome 15 open reading frame 39                                             |
| Tbrg1                             | NM_001009344        | 10830133        | 0.66        | -129         | 17.2        | turq        | transforming growth factor beta regulator 1 (chr20)                                              |
| Tbrg1                             | NM_001009344        | 10916237        | 0.67        | -149         | 15.6        | turq        | transforming growth factor beta regulator 1 (chr8)                                               |
| <b>IMMUNE RESPONSE</b>            |                     |                 |             |              |             |             |                                                                                                  |
| Cd37                              | NM_017124           | 10721728        | 1.51        | 15           | 2.2         | brwn        | CD37 molecule                                                                                    |
| Cd38                              | NM_013127           | 10777232        | 0.44        | -63          | 0           | grey        | CD38 molecule                                                                                    |
| Cd53                              | NM_012523           | 10825809        | 2.04        | 110          | 12.6        | turq        | Cd53 molecule                                                                                    |
| Cd84                              | NM_001192006        | 10765650        | 1.25        | 12           | 5.8         | turq        | CD84 molecule                                                                                    |
| Fcgr1a                            | NM_001100836        | 10825153        | 1.71        | 38           | 0           | grey        | Fc fragment of IgG, high affinity Ia, receptor (CD64)                                            |
| Fcgr2b                            | NM_175756           | 10769771        | 1.92        | 36           | 11.1        | turq        | Fc fragment of IgG, low affinity IIb, receptor (CD32)                                            |
| Ifi44l                            | XM_227820           | 10834014        | 1.89        | 46           | 11.7        | turq        | interferon-induced protein 44-like                                                               |
| Ifit2                             | NM_001024753        | 10714900        | 2.27        | 58           | 13.8        | turq        | interferon-induced protein with tetratricopeptide repeats 2                                      |
| IgG-2a                            | BC088423            | 10892499        | 0.08        | -77          | 0           | grey        | gamma-2a immunoglobulin heavy chain                                                              |
| Ighg                              | BC095846            | 10892536        | 0.59        | -11          | 0           | grey        | Immunoglobulin heavy chain (gamma polypeptide)                                                   |
| IgSF3                             | NM_001106455        | 10817868        | 0.63        | -14          | 5.3         | turq        | immunoglobulin superfamily, member 3                                                             |
| Irf7                              | NM_001033691        | 10726758        | 2.53        | 60           | 0           | grey        | interferon regulatory factor 7                                                                   |
| Ly49si2                           | NM_001009498        | 10866109        | 2.22        | 59           | 25.0        | turq        | immunoreceptor Ly49si2                                                                           |
| Ly6c                              | NM_020103           | 10904578        | 4.43        | 228          | 0           | grey        | Ly6-C antigen                                                                                    |
| Ly86                              | NM_001106128        | 10798027        | 2.57        | 173          | 17.5        | turq        | lymphocyte antigen 86                                                                            |
| Mpa2l                             | ENSRNOT00000040985  | 10771171        | 1.84        | 23           | 0           | grey        | macrophage activation 2 like                                                                     |
| Mx2                               | NM_134350           | 10750524        | 2.56        | 169          | 0           | grey        | myxovirus (influenza virus) resistance 2                                                         |
| Prp211                            | ENSRNOT00000043156  | 10748077        | 0.80        | -43          | 7.2         | turq        | proline rich protein 2-like 1                                                                    |
| RGD1561778                        | NM_001168284        | 10748857        | 1.84        | 37           | 0           | grey        | similar to dendritic cell-derived immunoglobulin(Ig)-like receptor 1, DlgR1 - mouse              |
| RGD1564284                        | ENSRNOT00000044584  | 10892509        | 0.12        | -68          | 0           | grey        | similar to immunoglobulin 4G6 heavy chain variable region                                        |
| RT1-T24-4                         | NM_001008826        | 10827820        | 1.74        | 56           | 4.5         | turq        | RT1 class I, locus T24, gene 4                                                                   |
| Thbd                              | NM_031771           | 10850525        | 1.95        | 19           | 6.3         | turq        | thrombomodulin                                                                                   |
| Tollip                            | NM_001109668        | 10726916        | 0.61        | -135         | 13.0        | brwn        | toll interacting protein                                                                         |
| <b>METABOLISM &amp; TRANSPORT</b> |                     |                 |             |              |             |             |                                                                                                  |
| A2ld1                             | NM_001025634        | 10786036        | 0.64        | -66          | 0           | grey        | AIG2-like domain 1                                                                               |
| Abhd11                            | BC088239            | 10761238        | 0.59        | -23          | 19.7        | turq        | abhydrolase domain containing 11                                                                 |
| Acacb                             | NM_053922           | 10762792        | 0.34        | -87          | 32.1        | turq        | acetyl-Coenzyme A carboxylase beta                                                               |
| Acp1                              | NM_021262           | 10890338        | 1.25        | 94           | 12.6        | turq        | acid phosphatase 1, soluble                                                                      |
| Acp6                              | NM_001031645        | 10817675        | 0.74        | -56          | 7.0         | turq        | acid phosphatase 6, lysophosphatidic                                                             |
| Afg3l1                            | NM_001108456        | 10808723        | 0.72        | -81          | 16.0        | turq        | AFG3(ATPase family gene 3)-like 1 (S. cerevisiae)                                                |
| Ahcy12                            | NM_001173510        | 10854221        | 0.66        | -91          | 6.2         | turq        | adenosylhomocysteinase-like 2                                                                    |
| Akr1c13                           | NM_001014240        | 10799337        | 0.66        | -18          | 0           | grey        | aldo-keto reductase family 1, member C13                                                         |
| Akr1c11                           | NM_001109900        | 10799357        | 1.39        | 17           | 0           | grey        | aldo-keto reductase family 1, member C-like 1                                                    |
| Aldh1l2                           | NM_001191778        | 10894582        | 0.50        | -31          | 8.0         | brwn        | aldehyde dehydrogenase 1 family, member L2                                                       |
| Alg3                              | <b>NM_001142363</b> | <b>10752137</b> | <b>0.54</b> | <b>-204</b>  | <b>44.9</b> | <b>turq</b> | <b>asparagine-linked glycosylation 3, alpha-1,3- mannosyltransferase homolog (S. cerevisiae)</b> |
| Alg8                              | NM_001034127        | 10708760        | 0.73        | -36          | 6.2         | turq        | asparagine-linked glycosylation 8, alpha-1,3-glucosyltransferase homolog (S. cerevisiae)         |
| Alkbh5                            | ENSRNOT00000034006  | <b>10734148</b> | <b>0.67</b> | <b>-234</b>  | <b>39.3</b> | <b>turq</b> | <b>alkB, alkylation repair homolog 5 (E. coli)</b>                                               |
| Arv1                              | NM_001106197        | 10808836        | 0.71        | -37          | 5.2         | turq        | ARV1 homolog (S. cerevisiae)                                                                     |
| Atp13a1                           | <b>NM_001106079</b> | <b>10791166</b> | <b>0.43</b> | <b>-97</b>   | <b>45.0</b> | <b>turq</b> | <b>ATPase type 13A1</b>                                                                          |
| Atp13a2                           | NM_001173432        | 10873606        | 0.43        | -31          | 24.1        | turq        | ATPase type 13A2                                                                                 |
| Atp2a2                            | NR_027839           | 10758555        | 0.64        | -609         | 12.6        | turq        | ATPase, Ca++ transporting, cardiac muscle, slow twitch 2                                         |
| Atp6v0a1                          | NM_031604           | 10738237        | 0.61        | -118         | 29.6        | turq        | ATPase, H+ transporting, lysosomal V0 subunit A1                                                 |
| Atp6v0a2                          | <b>NM_053775</b>    | <b>10761639</b> | <b>0.59</b> | <b>-25</b>   | <b>41.3</b> | <b>turq</b> | <b>ATPase, H+ transporting, lysosomal V0 subunit A2</b>                                          |
| Atp6v0c                           | <b>NM_130823</b>    | <b>10740996</b> | <b>0.61</b> | <b>-640</b>  | <b>68.6</b> | <b>turq</b> | <b>ATPase, H+ transporting, lysosomal 16kDa, V0 subunit c</b>                                    |
| Atp6v1a                           | NM_001108318        | 10751161        | 0.64        | -213         | 0           | grey        | ATPase, H+ transporting, lysosomal V1 subunit A (chr11)                                          |
| Atp6v1a                           | NM_001108318        | 10823609        | 0.63        | -351         | 13.8        | turq        | ATPase, H+ transporting, lysosomal V1 subunit A (chr2)                                           |
| Atp6v1b2                          | NM_057213           | 10791233        | 0.77        | -264         | 6.3         | turq        | ATPase, H transporting, lysosomal V1 subunit B2                                                  |

|               |                     |                 |             |             |             |             |                                                                                                               |
|---------------|---------------------|-----------------|-------------|-------------|-------------|-------------|---------------------------------------------------------------------------------------------------------------|
| C1galt1       | NM_022950           | 10853691        | 1.70        | 269         | 28.0        | turq        | core 1 synthase, glycoprotein-N-acetylgalactosamine 3-beta-galactosyltransferase, 1                           |
| Cant1         | NM_144754           | 10749502        | 0.70        | -29         | 8.6         | blue        | calcium activated nucleotidase 1                                                                              |
| Cds2          | NM_053643           | 10840085        | 0.60        | -248        | 18.5        | turq        | CDP-diacylglycerol synthase (phosphatidate cytidyltransferase) 2                                              |
| Clstn1        | ENSRNOT00000022100  | 10874095        | 0.39        | -126        | 32.7        | turq        | calsyntenin 1                                                                                                 |
| Cmpk2         | NM_001108017        | 10883960        | 2.25        | 36          | 8.2         | turq        | cytidine monophosphate (UMP-CMP) kinase 2, mitochondrial                                                      |
| Cpt1a         | NM_031559           | 10712657        | 0.51        | -304        | 35.0        | turq        | carnitine palmitoyltransferase 1a, liver                                                                      |
| <b>Ddost</b>  | <b>NM_001012104</b> | <b>10873303</b> | <b>0.52</b> | <b>-947</b> | <b>56.0</b> | <b>turq</b> | <b>dolichyl-diphosphooligosaccharide-protein glycosyltransferase</b>                                          |
| Dhcr24        | NM_001080148        | 10870567        | 0.30        | -189        | 11.8        | turq        | 24-dehydrocholesterol reductase                                                                               |
| Dhcr7         | NM_022389           | 10712560        | 0.37        | -130        | 25.3        | turq        | 7-dehydrocholesterol reductase                                                                                |
| Dolpp1        | NM_001106567        | 10835233        | 0.53        | -48         | 19.1        | turq        | dolichyl pyrophosphate phosphatase 1                                                                          |
| Dpagt1        | NM_199388           | 10909470        | 0.67        | -134        | 24.8        | turq        | dolichyl-phosphate (UDP-N-acetylglucosamine) N-acetylglucosaminephosphotransferase 1 (GlcNAc-1-P transferase) |
| Eri2          | NM_001191114        | 10725331        | 1.34        | 48          | 21.3        | turq        | exoribonuclease 2                                                                                             |
| Exoc8         | NM_139043           | 10811947        | 0.51        | -70         | 21.9        | turq        | exocyst complex component 8                                                                                   |
| Exosc6        | ENSRNOT00000025179  | 10808063        | 0.61        | -10         | 21.2        | blue        | exosome component 6                                                                                           |
| <b>Ganab</b>  | <b>NM_001106334</b> | <b>10713706</b> | <b>0.52</b> | <b>-354</b> | <b>69.2</b> | <b>turq</b> | <b>glucosidase, alpha; neutral AB</b>                                                                         |
| Gfpt1         | NM_001005879        | 10857036        | 0.65        | -305        | 0           | grey        | glutamine fructose-6-phosphate transaminase 1                                                                 |
| Glb1l2        | NM_001192018        | 10915843        | 0.27        | -104        | 22.2        | turq        | galactosidase, beta 1-like 2                                                                                  |
| Gsk3a         | NM_017344           | 10719798        | 0.72        | -71         | 20.0        | turq        | glycogen synthase kinase 3 alpha                                                                              |
| Gstm1         | NM_017014           | 10825925        | 0.55        | -865        | 6.7         | turq        | glutathione S-transferase mu 1                                                                                |
| Gstt1         | NM_053293           | 10832555        | 0.58        | -96         | 4.1         | turq        | glutathione S-transferase theta 1                                                                             |
| Guf1          | NM_001107215        | 10776646        | 1.24        | 104         | 17.6        | turq        | GUF1 GTPase homolog (S. cerevisiae)                                                                           |
| Hdlbp         | NM_172039           | 10930015        | 0.68        | -508        | 33.0        | turq        | high density lipoprotein binding protein                                                                      |
| Herc2         | NM_001107520        | 10707455        | 0.76        | -51         | 24.2        | turq        | hect domain and RLD 2                                                                                         |
| Hexa          | NM_001004443        | 10910490        | 0.65        | -206        | 8.6         | brwn        | hexosaminidase A                                                                                              |
| Hk2           | NM_012735           | 10863430        | 0.52        | -78         | 35.9        | turq        | hexokinase 2                                                                                                  |
| Hsd1l         | NM_001024896        | 10811415        | 0.72        | -20         | 3.7         | turq        | hydroxysteroid dehydrogenase like 1                                                                           |
| Kat2a         | NM_001107050        | 10747439        | 0.70        | -14         | 7.2         | turq        | K(lysine) acetyltransferase 2A                                                                                |
| Kctd1         | ENSRNOT00000061504  | 10803294        | 0.45        | -49         | 9.4         | turq        | potassium channel tetramerisation domain containing 1                                                         |
| Kctd3         | NM_001107199        | 10770613        | 0.55        | -68         | 29.9        | turq        | potassium channel tetramerisation domain containing 3                                                         |
| Kdm1          | NM_001130098        | 10880691        | 0.62        | -105        | 28.9        | turq        | lysine (K)-specific demethylase 1                                                                             |
| Kpna1         | NM_198726           | 10754410        | 0.70        | -205        | 3.7         | turq        | karyopherin alpha 1                                                                                           |
| LOC100362008  | ENSRNOT00000007042  | 10731803        | 0.50        | -43         | 9.0         | turq        | adenylate cyclase 9                                                                                           |
| Lrat          | NM_022280           | 10823949        | 1.50        | 23          | 13.2        | turq        | lecithin-retinol acyltransferase (phosphatidylcholine-retinol-O-acyltransferase)                              |
| Lss           | NM_031049           | 10832378        | 0.41        | -189        | 12.9        | turq        | lanosterol synthase (2,3-oxidosqualene-lanosterol cyclase)                                                    |
| Magi1         | NM_001030045        | 10864243        | 0.60        | -67         | 9.1         | turq        | membrane associated guanylate kinase, WW and PDZ domain containing 1                                          |
| Mfsd4         | NM_001109069        | 10767565        | 0.20        | -70         | 6.1         | turq        | major facilitator superfamily domain containing 4                                                             |
| Mocs4         | NM_001108425        | 10800546        | 0.62        | -19         | 3.51        | green       | molybdenum cofactor sulfuryase                                                                                |
| Mocs3         | NM_001107804        | 10842493        | 0.45        | -34         | 0           | grey        | molybdenum cofactor synthesis 3                                                                               |
| Mthfr         | ENSRNOT00000011384  | 10873903        | 0.65        | -22         | 6.9         | turq        | 5,10-methylenetetrahydrofolate reductase (NADPH)                                                              |
| Mvd           | NM_031062           | 10811560        | 0.41        | -49         | 8.8         | turq        | mevalonate (diphospho) decarboxylase                                                                          |
| Naga          | NM_001012120        | 10905705        | 0.47        | -130        | 16.0        | blue        | N-acetyl galactosaminidase, alpha                                                                             |
| Nags          | NM_001107053        | 10738522        | 0.57        | -15         | 0           | grey        | N-acetylglutamate synthase                                                                                    |
| Ndst1         | NM_024361           | 10804582        | 0.57        | -58         | 14.4        | turq        | N-deacetylase/N-sulfotransferase (heparan glucosaminyl) 1                                                     |
| Necap2        | NM_199096           | 10881047        | 0.73        | -28         | 12.6        | turq        | NECAP endocytosis associated 2                                                                                |
| Nmt1          | NM_148891           | 10738643        | 0.75        | -131        | 12.5        | turq        | N-myristoyltransferase 1                                                                                      |
| Pcyox1l       | NM_001134542        | 10804714        | 0.32        | -58         | 19.2        | turq        | prenylcysteine oxidase 1 like                                                                                 |
| Pigb          | NM_001108166        | 10918657        | 0.62        | -15         | 5.7         | turq        | phosphatidylinositol glycan anchor biosynthesis, class B                                                      |
| Pigo          | ENSRNOT00000013213  | 10876259        | 0.62        | -48         | 27.7        | turq        | phosphatidylinositol glycan anchor biosynthesis, class O                                                      |
| Pitpna        | NM_017231           | 10735974        | 0.73        | -365        | 9.3         | turq        | phosphatidylinositol transfer protein, alpha                                                                  |
| Pitpnm2       | NM_001107139        | 10758302        | 0.61        | -28         | 29.9        | turq        | phosphatidylinositol transfer protein, membrane-associated 2                                                  |
| Plch1         | NM_001191707        | 10823432        | 0.50        | -14         | 8.6         | brwn        | phospholipase C, eta 1                                                                                        |
| <b>Pld3</b>   | <b>NM_001012167</b> | <b>10720097</b> | <b>0.46</b> | <b>-120</b> | <b>41.0</b> | <b>turq</b> | <b>phospholipase D family, member 3</b>                                                                       |
| Pln           | NM_022707           | 10830174        | 1.67        | 44          | 3.1         | ylw         | phospholamban                                                                                                 |
| Ppapdc3       | NM_001012349        | 10835498        | 0.70        | -12         | 0           | grey        | phosphatidic acid phosphatase type 2 domain containing 3                                                      |
| Ptar1         | NM_001105760        | 10714422        | 0.79        | -33         | 0           | grey        | protein prenyltransferase alpha subunit repeat containing 1                                                   |
| Ptges2        | NM_001107832        | 10835597        | 0.54        | -68         | 21.1        | turq        | prostaglandin E synthase 2                                                                                    |
| Pus10         | NM_001025278        | 10774577        | 1.40        | 35          | 0           | grey        | pseudouridylyl synthase 10                                                                                    |
| RGD1309808    | NM_001134801        | 10897411        | 0.61        | -11         | 0           | grey        | similar to apolipoprotein L2; apolipoprotein L-II                                                             |
| <b>Rhbdd2</b> | <b>NM_001191827</b> | <b>10761180</b> | <b>0.49</b> | <b>-115</b> | <b>46.4</b> | <b>turq</b> | <b>rhomboid domain containing 2</b>                                                                           |
| Rtn3          | NM_080909           | 10728425        | 0.78        | -277        | 26.5        | turq        | reticulon 3                                                                                                   |
| Sc4mol        | NM_080886           | 10787841        | 0.60        | -374        | 11.2        | turq        | sterol-C4-methyl oxidase-like                                                                                 |
| Scamp1        | NM_001100636        | 10820511        | 0.60        | -280        | 13.2        | turq        | secretory carrier membrane protein 1                                                                          |
| Scamp4        | NM_031725           | 10900478        | 0.50        | -155        | 36.3        | turq        | secretory carrier membrane protein 4                                                                          |
| Scamp5        | NM_031726           | 10917761        | 0.68        | -18         | 0           | grey        | secretory carrier membrane protein 5                                                                          |
| Scnn1g        | NM_017046           | 10710580        | 0.22        | -58         | 0           | grey        | sodium channel, nonvoltage-gated 1, gamma                                                                     |
| Sec24a        | NM_001105780        | 10742509        | 0.64        | -261        | 18.9        | turq        | SEC24 family, member A (S. cerevisiae)                                                                        |
| Sec63         | NM_001107637        | 10830583        | 0.72        | -210        | 6.7         | turq        | SEC63 homolog (S. cerevisiae)                                                                                 |

|                    |                     |                 |             |             |             |             |                                                                                                      |
|--------------------|---------------------|-----------------|-------------|-------------|-------------|-------------|------------------------------------------------------------------------------------------------------|
| Shpk               | NM_001033682        | 10735669        | 0.59        | -26         | 0           | grey        | sedoheptulokinase                                                                                    |
| Slc11a1            | NM_001031658        | 10924286        | 1.58        | 10          | 0           | grey        | solute carrier family 11 (proton-coupled divalent metal ion transporters), member 1                  |
| Slc15a4            | NM_144758           | 10758094        | 0.75        | -27         | 20.9        | turq        | solute carrier family 15, member 4                                                                   |
| Slc16a10           | NM_138831           | 10833635        | 0.43        | -150        | 32.2        | turq        | solute carrier family 16 (monocarboxylic acid transporters), member 10                               |
| Slc25a29           | NM_001010958        | 10892147        | 0.24        | -28         | 20.7        | turq        | solute carrier family 25, member 29                                                                  |
| Slc25a44           | NM_001108947        | 10824300        | 0.50        | -98         | 21.6        | turq        | solute carrier family 25, member 44                                                                  |
| Slc26a6            | NM_001143817        | 10913311        | 0.52        | -21         | 19.4        | turq        | solute carrier family 26, member 6                                                                   |
| Slc28a2            | NM_031664           | 10849275        | 3.01        | 146         | 2.2         | turq        | solute carrier family 28 (sodium-coupled nucleoside transporter), member 2                           |
| Slc29a3            | NM_181639           | 10833005        | 0.54        | -76         | 11.8        | turq        | solute carrier family 29 (nucleoside transporters), member 3                                         |
| Slc2a1             | NM_138827           | 10871521        | 0.36        | -157        | 22.1        | turq        | solute carrier family 2 (facilitated glucose transporter), member 1                                  |
| Slc35d1            | NM_001106668        | 10878361        | 0.50        | -55         | 5.9         | turq        | solute carrier family 35 (UDP-glucuronic acid/UDP-N-acetylgalactosamine dual transporter), member D1 |
| <b>Slc35e1</b>     | <b>NM_001109107</b> | <b>10787121</b> | <b>0.39</b> | <b>-120</b> | <b>40.8</b> | <b>turq</b> | <b>solute carrier family 35, member E1</b>                                                           |
| Slc36a1            | NM_130415           | 10733697        | 0.47        | -95         | 31.2        | turq        | solute carrier family 36 (proton/amino acid symporter), member 1                                     |
| Slc37a1            | NM_001011944        | 10829116        | 0.55        | -34         | 12.8        | turq        | solute carrier family 37 (glycerol-3-phosphate transporter), member 1                                |
| Slc39a11           | NM_001013042        | 10748765        | 0.53        | -70         | 22.1        | turq        | solute carrier family 39 (metal ion transporter), member 11                                          |
| Slc3a2             | NM_019283           | 10728507        | 0.80        | -286        | 14.9        | turq        | solute carrier family 3 (activators of dibasic and neutral amino acid transport), member 2           |
| Slc44a1            | NM_001033852        | 10869106        | 0.66        | -149        | 6.9         | turq        | solute carrier family 44, member 1                                                                   |
| Slc46a3            | NM_001024968        | 10756411        | 0.35        | -77         | 29.0        | turq        | solute carrier family 46, member 3                                                                   |
| Slc4a2             | NM_017048           | 10860021        | 0.61        | -48         | 28.3        | turq        | solute carrier family 4 (anion exchanger), member 2                                                  |
| Slc7a1             | NM_013111           | 10756393        | 0.30        | -91         | 27.5        | turq        | solute carrier family 7 (cationic amino acid transporter, y+ system), member 1                       |
| Slc9a3r1           | NM_021594           | 10739490        | 0.44        | -361        | 5.0         | turq        | solute carrier family 9 (sodium/hydrogen exchanger), member 3 regulator 1                            |
| Slc9a8             | NM_001025281        | 10842440        | 0.57        | -112        | 22.1        | turq        | solute carrier family 9 (sodium/hydrogen exchanger), member 8                                        |
| Slco2a1            | NM_022667           | 10912614        | 0.54        | -51         | 11.4        | turq        | solute carrier organic anion transporter family, member 2a1                                          |
| Soat1              | NM_031118           | 10768979        | 0.74        | -56         | 5.2         | turq        | sterol O-acyltransferase 1                                                                           |
| Sphk2              | NM_001012066        | 10721883        | 0.53        | -82         | 0           | grey        | sphingosine kinase 2                                                                                 |
| Sqrdl              | NM_001047913        | 10852636        | 1.25        | 54          | 0           | grey        | sulfide quinone reductase-like (yeast)                                                               |
| Srd5a1             | NM_017070           | 10793310        | 0.51        | -49         | 9.7         | turq        | steroid-5-alpha-reductase, alpha polypeptide 1 (3-oxo-5 alpha-steroid delta 4-dehydrogenase alpha 1) |
| St8sia4            | NM_053914           | 10930094        | 1.49        | 15          | 4.1         | brwn        | ST8 alpha-N-acetyl-neuraminide alpha-2,8-sialyltransferase 4                                         |
| Stard4             | NM_001106159        | 10803681        | 0.49        | -47         | 4.4         | brwn        | StAR-related lipid transfer (START) domain containing 4                                              |
| Stt3a              | NM_001134749        | 10916125        | 0.70        | -642        | 14.9        | turq        | STT3, subunit of the oligosaccharyltransferase complex, homolog A (S. cerevisiae)                    |
| Tk2                | NM_001106166        | 10805731        | 0.82        | -20         | 6.8         | turq        | thymidine kinase 2, mitochondrial                                                                    |
| Tpo2               | NM_001107166        | 10809967        | 0.57        | -199        | 37.3        | turq        | transportin 2 (importin 3, karyopherin beta 2b)                                                      |
| Trak2              | NM_133560           | 10928307        | 0.72        | -79         | 9.5         | turq        | trafficking protein, kinesin binding 2                                                               |
| Trappc10           | NM_001173528        | 10829218        | 0.46        | -155        | 24.5        | turq        | trafficking protein particle complex 10                                                              |
| Ttpal              | NM_001106537        | 10842032        | 0.51        | -35         | 0           | grey        | tocopherol (alpha) transfer protein-like                                                             |
| Ubiad1             | NM_001107993        | 10881619        | 0.69        | -21         | 16.3        | turq        | UbiA prenyltransferase domain containing 1                                                           |
| Ubp1               | NM_001191819        | 10913942        | 0.70        | -56         | 0           | grey        | upstream binding protein 1 (LBP-1a)                                                                  |
| Uggt1              | NM_133596           | 10927285        | 0.47        | -347        | 22.9        | turq        | UDP-glucose glycoprotein glucosyltransferase 1                                                       |
| Xpo1               | NM_053490           | 10774472        | 1.40        | 173         | 11.2        | blue        | exportin 1, CRM1 homolog (yeast)                                                                     |
| <b>PROTEOLYSIS</b> |                     |                 |             |             |             |             |                                                                                                      |
| Aktip              | NM_001011926        | 10806283        | 0.64        | -273        | 7.0         | turq        | AKT interacting protein                                                                              |
| Capn5              | NM_134461           | 10723792        | 0.48        | -32         | 2.55        | green       | calpain 5                                                                                            |
| Cpa3               | NM_019300           | 10822493        | 2.30        | 34          | 11.9        | turq        | carboxypeptidase A3, mast cell                                                                       |
| Cpd                | NM_012836           | 10736486        | 0.67        | -196        | 3.3         | turq        | carboxypeptidase D                                                                                   |
| Cst3               | NM_012837           | 10850563        | 1.76        | 622         | 21.7        | turq        | cystatin C                                                                                           |
| <b>Dpp9</b>        | <b>XM_001061312</b> | <b>10930990</b> | <b>0.56</b> | <b>-91</b>  | <b>58.5</b> | <b>turq</b> | <b>dipeptidyl peptidase 9</b>                                                                        |
| Faf2               | NM_001017445        | 10797420        | 0.73        | -75         | 6.4         | blue        | Fas associated factor family member 2                                                                |
| LOC363188          | NM_001178071        | 10921462        | 0.62        | -150        | 21.8        | turq        | similar to ubiquitin protein ligase E3 component n-recogin 2                                         |
| Mcpt1              | U67915              | 10783998        | 2.08        | 38          | 19.0        | turq        | mast cell protease 1                                                                                 |
| Mcpt2              | ENSRNOT0000027988   | 10780561        | 1.78        | 25          | 17.4        | turq        | mast cell protease 2                                                                                 |
| <b>Mgrn1</b>       | <b>NM_001013964</b> | <b>10740649</b> | <b>0.60</b> | <b>-126</b> | <b>45.1</b> | <b>turq</b> | <b>mahogunin, ring finger 1</b>                                                                      |
| Mon2               | BC105870            | 10902804        | 0.70        | -130        | 5.6         | turq        | MON2 homolog (S. cerevisiae)                                                                         |
| Pctk3              | NM_001100506        | 10767577        | 0.53        | -58         | 23.8        | turq        | PCTAIRE protein kinase 3                                                                             |
| <b>Pmpca</b>       | <b>NM_001003673</b> | <b>10834432</b> | <b>0.78</b> | <b>-204</b> | <b>37.9</b> | <b>turq</b> | <b>peptidase (mitochondrial processing) alpha</b>                                                    |
|                    |                     |                 |             |             |             |             | proteasome (prosome, macropain) subunit, beta type 8 (large multifunctional peptidase 7)             |
| Psmb8              | NM_080767           | 10831595        | 1.38        | 33          | 0           | grey        | proteasome (prosome, macropain) subunit, beta type 8 (large multifunctional peptidase 7)             |
| Psmc4              | NM_057122           | 10893366        | 0.67        | -315        | 18.9        | turq        | proteasome (prosome, macropain) 26S subunit, ATPase, 4                                               |
| <b>Psm2</b>        | <b>NM_001031639</b> | <b>10755357</b> | <b>0.68</b> | <b>-450</b> | <b>44.9</b> | <b>turq</b> | <b>proteasome (prosome, macropain) 26S subunit, non-ATPase, 2</b>                                    |
| Rce1               | NM_001100585        | 10727606        | 0.53        | -50         | 0           | grey        | RCE1 homolog, prenyl protein peptidase (S. cerevisiae)                                               |
| Rnf10              | NM_001011904        | 10758991        | 0.64        | -201        | 28.8        | turq        | ring finger protein 10                                                                               |
| Rnf144b            | NM_001108881        | 10797728        | 0.64        | -66         | 7.8         | turq        | ring finger protein 144B                                                                             |
| Rnf146             | NM_022518           | 10702428        | 0.78        | -25         | 0           | grey        | ring finger protein 146                                                                              |
| Rnf160             | NM_001024235        | 10752865        | 0.74        | -92         | 10.5        | turq        | ring finger protein 160                                                                              |
| <b>Rnf26</b>       | <b>NM_001113748</b> | <b>10916664</b> | <b>0.60</b> | <b>-72</b>  | <b>54.6</b> | <b>turq</b> | <b>ring finger protein 26</b>                                                                        |

|                                         |                     |                 |             |             |             |             |                                                                                  |
|-----------------------------------------|---------------------|-----------------|-------------|-------------|-------------|-------------|----------------------------------------------------------------------------------|
| Rnf40                                   | NM_153471           | 10711139        | 0.71        | -52         | 28.4        | turq        | ring finger protein 40                                                           |
| Senp2                                   | NM_023989           | 10755186        | 0.70        | -59         | 4.8         | turq        | Sumo1/sentrin/SMT3 specific peptidase 2                                          |
| Sspl2b                                  | NM_001014200        | 10900383        | 0.77        | -27         | 31.2        | turq        | signal peptide peptidase-like 2B                                                 |
| Spsb3                                   | NM_001106988        | 10732243        | 0.79        | -38         | 4.3         | brwn        | spla/ryanodine receptor domain and SOCS box containing 3                         |
| <b>Uba1</b>                             | <b>NM_001014080</b> | <b>10936582</b> | <b>0.57</b> | <b>-528</b> | <b>42.2</b> | <b>turq</b> | <b>ubiquitin-like modifier activating enzyme 1</b>                               |
| Uba6                                    | NM_001107213        | 10772072        | 1.50        | 173         | 24.2        | turq        | ubiquitin-like modifier activating enzyme 6                                      |
| Ubc                                     | NM_017314           | 10758134        | 0.60        | -462        | 21.2        | turq        | ubiquitin C                                                                      |
| Ube2l6                                  | NM_001024755        | 10837342        | 1.64        | 31          | 5.4         | turq        | ubiquitin-conjugating enzyme E2L 6                                               |
| Ube2o                                   | ENSRNOT00000014699  | 10749287        | 0.65        | -32         | 12.9        | turq        | ubiquitin-conjugating enzyme E2O                                                 |
| Ube4b                                   | ENSRNOT00000055572  | 10881740        | 0.56        | -99         | 27.9        | turq        | ubiquitination factor E4B (UFD2 homolog, yeast)                                  |
| Ubfd1                                   | NM_001034911        | 10710611        | 0.71        | -54         | 6.7         | turq        | ubiquitin family domain containing 1                                             |
| Ubqln1                                  | NM_053747           | 10793878        | 0.62        | -330        | 23.1        | turq        | ubiquilin 1                                                                      |
| <b>Usp10</b>                            | <b>NM_001034146</b> | <b>10808362</b> | <b>0.44</b> | <b>-138</b> | <b>44.1</b> | <b>turq</b> | <b>ubiquitin specific peptidase 10</b>                                           |
| Usp19                                   | NM_001001516        | 10793175        | 0.79        | -77         | 20.0        | turq        | ubiquitin specific peptidase 19                                                  |
| Usp31                                   | NM_001107548        | 10725407        | 0.68        | -29         | 0           | grey        | ubiquitin specific peptidase 31                                                  |
| Usp4                                    | NM_001135012        | 10793106        | 0.72        | -157        | 1.67        | green       | ubiquitin specific peptidase 4 (proto-oncogene)                                  |
| Usp48                                   | NM_198785           | 10873138        | 0.76        | -63         | 4.6         | turq        | ubiquitin specific peptidase 48                                                  |
| Vps11                                   | NM_001108138        | 10916768        | 0.65        | -81         | 24.0        | turq        | vacuolar protein sorting 11 homolog (S. cerevisiae)                              |
| Vps13a                                  | NM_001100975        | 10729124        | 1.46        | 177         | 16.0        | blue        | vacuolar protein sorting 13 homolog A (S. cerevisiae)                            |
| Vps33b                                  | NM_022286           | 10708188        | 0.56        | -55         | 17.7        | turq        | vacuolar protein sorting 33 homolog B (yeast)                                    |
| Vps37c                                  | NM_001107463        | 10713966        | 0.68        | -30         | 13.7        | turq        | vacuolar protein sorting 37 homolog C (S. cerevisiae)                            |
| Vps39                                   | NM_001012186        | 10848801        | 0.65        | -75         | 22.0        | turq        | vacuolar protein sorting 39 homolog (S. cerevisiae)                              |
| Vps53                                   | NM_001105813        | 10744999        | 0.75        | -81         | 8.5         | turq        | vacuolar protein sorting 53 homolog (S. cerevisiae)                              |
| Vps72                                   | NM_001107695        | 10817324        | 0.63        | -62         | 29.0        | turq        | vacuolar protein sorting 72 homolog (S. cerevisiae)                              |
| <b>RECEPTORS &amp; BINDING PROTEINS</b> |                     |                 |             |             |             |             |                                                                                  |
| Abca3                                   | BC088202            | 10732021        | 0.40        | -94         | 24.8        | turq        | ATP-binding cassette, sub-family A (ABC1), member 3                              |
| Abca7                                   | NM_207598           | 10900651        | 0.43        | -23         | 16.4        | turq        | ATP-binding cassette, sub-family A (ABC1), member 7                              |
| Abcc4                                   | NM_133411           | 10785826        | 0.51        | -63         | 7.5         | turq        | ATP-binding cassette, sub-family C (CFTR/MRP), member 4                          |
| <b>Abcf1</b>                            | <b>NM_001109883</b> | <b>10827846</b> | <b>0.68</b> | <b>-105</b> | <b>37.6</b> | <b>turq</b> | <b>ATP-binding cassette, sub-family F (GCN20), member 1</b>                      |
| Appl1                                   | NM_001100802        | 10720572        | 0.63        | -16         | 2.76        | green       | amyloid beta (A4) precursor-like protein 1                                       |
| Becn1                                   | NM_053739           | 10747620        | 0.59        | -168        | 30.1        | turq        | beclin 1, autophagy related                                                      |
| Ctu1                                    | NM_001106251        | 10706381        | 0.61        | -12         | 2.2         | brwn        | cytosolic thiouridylase subunit 1 homolog (S. pombe)                             |
| Cxadr1                                  | NM_199406           | 10820153        | 0.47        | -13         | 0           | grey        | coxsackie virus and adenovirus receptor-like 1 (chr2)                            |
| Cxadr1                                  | NM_199406           | 10919443        | 0.47        | -13         | 0           | grey        | coxsackie virus and adenovirus receptor-like 1 (chr8)                            |
| Epha1                                   | NM_001107858        | 10862262        | 0.46        | -24         | 0           | grey        | Eph receptor A1                                                                  |
| Fgfbp1                                  | NM_022603           | 10773146        | 0.48        | -12.9       | 4.36        | blue        | fibroblast growth factor binding protein 1                                       |
| F2r1                                    | NM_053897           | 10820577        | 0.65        | -12         | 6.6         | turq        | coagulation factor II (thrombin) receptor-like 1                                 |
| Fzd5                                    | NM_173838           | 10928533        | 0.41        | -56         | 28.2        | turq        | frizzled homolog 5 (Drosophila)                                                  |
| Heatr1                                  | NM_001108418        | 10799087        | 0.64        | -44         | 3.0         | turq        | HEAT repeat containing 1                                                         |
| Heatr5b                                 | NM_001191064        | 10887861        | 0.68        | -41         | 23.2        | turq        | HEAT repeat containing 5B                                                        |
| Htr2b                                   | NM_017250           | 10929566        | 1.93        | 16          | 0           | grey        | 5-hydroxytryptamine (serotonin) receptor 2B                                      |
| Htr5b                                   | NM_024395           | 10767186        | 0.42        | -11         | 0           | grey        | 5-hydroxytryptamine (serotonin) receptor 5B                                      |
| Il1r1                                   | NM_013123           | 10922826        | 0.51        | -79         | 0           | grey        | interleukin 1 receptor, type I                                                   |
| Il7r                                    | NM_001106418        | 10821851        | 1.65        | 14          | 14.8        | turq        | interleukin 7 receptor                                                           |
| <b>Kdelr2</b>                           | <b>NM_001013122</b> | <b>10760397</b> | <b>0.74</b> | <b>-233</b> | <b>38.0</b> | <b>turq</b> | <b>KDEL (Lys-Asp-Glu-Leu) endoplasmic reticulum protein retention receptor 2</b> |
| Ldlr                                    | NM_175762           | 10908521        | 0.33        | -215        | 14.0        | turq        | low density lipoprotein receptor                                                 |
| Leng8                                   | NM_001037790        | 10719006        | 1.77        | 91          | 13.9        | blue        | leukocyte receptor cluster (LRC) member 8                                        |
| LOC500726                               | ENSRNOT00000030246  | 10887516        | 0.46        | -98         | 30.8        | turq        | similar to KARP-1 binding protein 1                                              |
| <b>Lrp10</b>                            | <b>NM_001037777</b> | <b>10780218</b> | <b>0.41</b> | <b>-190</b> | <b>63.8</b> | <b>turq</b> | <b>low-density lipoprotein receptor-related protein 10</b>                       |
| M6pr                                    | NM_001007700        | 10934772        | 0.69        | -498        | 0           | grey        | mannose-6-phosphate receptor, cation dependent                                   |
| Maea                                    | NM_001008319        | 10773613        | 0.69        | -144        | 16.5        | turq        | macrophage erythroblast attacher                                                 |
| Ms4a11                                  | ENSRNOT00000033795  | 10714020        | 2.31        | 62          | 14.9        | turq        | membrane-spanning 4-domains, subfamily A, member 11                              |
| Ms4a6a                                  | ENSRNOT00000032937  | 10728918        | 3.11        | 47          | 14.6        | turq        | membrane-spanning 4-domains, subfamily A, member 6A                              |
| N4bp1                                   | ENSRNOT00000049285  | 10806365        | 0.74        | -48         | 15.1        | turq        | Nedd4 binding protein 1                                                          |
| Olr1749                                 | NM_001001429        | 10827669        | 0.62        | -11         | 0           | grey        | olfactory receptor 1749                                                          |
| Olr518                                  | NM_001000676        | 10837485        | 0.54        | -11         | 17.5        | blue        | olfactory receptor 518                                                           |
| Olr964                                  | NM_001001073        | 10893355        | 0.54        | -15         | 18.4        | blue        | olfactory receptor 964                                                           |
| Paqr7                                   | NM_001034081        | 10872808        | 0.54        | -172        | 25.5        | turq        | progesterin and adipoQ receptor family member VII                                |
| <b>Plexb2</b>                           | <b>NM_001108106</b> | <b>10906169</b> | <b>0.50</b> | <b>-237</b> | <b>48.0</b> | <b>turq</b> | <b>plexin B2</b>                                                                 |
| Pnpla6                                  | ENSRNOT00000001298  | 10759662        | 0.59        | -26         | 13.4        | turq        | patatin-like phospholipase domain containing 6                                   |
| Pvrl1                                   | ENSRNOT00000008614  | 10909394        | 0.66        | -19         | 6.4         | turq        | poliovirus receptor-related 1                                                    |
| Pvrl2                                   | NM_001012064        | 10719549        | 0.47        | -64         | 22.8        | turq        | poliovirus receptor-related 2                                                    |
| Ranbp1                                  | NM_001108324        | 10752334        | 1.30        | 153         | 4.0         | turq        | RAN binding protein 1                                                            |
| Ranbp3                                  | ENSRNOT00000057538  | 10837478        | 0.75        | -58         | 8.4         | turq        | RAN binding protein 3                                                            |
| Rtp4                                    | NM_001108321        | 10755088        | 3.06        | 72          | 0           | grey        | receptor (chemosensory) transporter protein 4                                    |
| Sort1                                   | NM_053519           | 10916493        | 0.33        | -161        | 22.2        | turq        | sortilin-related receptor, LDLR class A repeats-containing                       |
| Sort1                                   | NM_031767           | 10818326        | 0.64        | -172        | 0           | grey        | sortilin 1                                                                       |
| Taar7g                                  | NM_175588           | 10717274        | 0.65        | -11         | 0           | grey        | trace amine-associated receptor 7g                                               |
| Tyrobp                                  | NM_212525           | 10705874        | 1.21        | 11          | 0           | grey        | Tyro protein tyrosine kinase binding protein                                     |

|                  |                           |                 |             |             |             |             |                                                                             |
|------------------|---------------------------|-----------------|-------------|-------------|-------------|-------------|-----------------------------------------------------------------------------|
| Vom1r56          | NM_001008929              | 10704297        | 0.63        | -11         | 0           | grey        | vomeroneasal 1 receptor, 56                                                 |
| Vom1r74          | NM_001008911              | 10855818        | 0.62        | -14         | 1.86        | green       | vomeroneasal 1 receptor, 74                                                 |
| <b>SIGNALING</b> |                           |                 |             |             |             |             |                                                                             |
| Acvr1b           | NM_199230                 | 10899367        | 0.45        | -93         | 9.1         | turq        | activin A receptor, type IB                                                 |
| Arhgap27         | NM_198759                 | 10748042        | 0.53        | -16         | 0           | grey        | Rho GTPase activating protein 27                                            |
| Arhgef19         | NM_001108692              | 10873688        | 0.48        | -13         | 0           | grey        | Rho guanine nucleotide exchange factor (GEF) 19                             |
| Bst2             | NM_198134                 | 10790811        | 2.52        | 138         | 0           | grey        | bone marrow stromal cell antigen 2                                          |
| C2cd2l           | NM_001011996              | 10916734        | 0.59        | -51         | 16.8        | turq        | C2 calcium-dependent domain containing 2-like                               |
| Camkk1           | NM_031662                 | 10735615        | 0.57        | -11         | 4.1         | turq        | calcium/calmodulin-dependent protein kinase kinase 1, alpha                 |
| Cdc42bpg         | NM_001130013              | 10713278        | 0.49        | -44         | 10.4        | turq        | CDC42 binding protein kinase gamma (DMPK-like)                              |
| Cdc42ep4         | NM_001107063              | 10748795        | 0.68        | -38         | 8.4         | blue        | CDC42 effector protein (Rho GTPase binding) 4                               |
| Cdcp1            | NM_001106869              | 10921107        | 0.29        | -27         | 7.2         | turq        | CUB domain containing protein 1                                             |
| Cerk             | NM_001134861              | 10906024        | 0.65        | -39         | 1.88        | green       | ceramide kinase                                                             |
| Chn1             | NM_032083                 | 10846220        | 0.62        | -41         | 0           | grey        | chimerin (chimaerin) 1                                                      |
| Csnk1a1          | NM_053615                 | 10802114        | 0.82        | -353        | 5.0         | brwn        | casein kinase 1, alpha 1                                                    |
| Csrnp1           | NM_001108786              | 10920967        | 0.55        | -25         | 5.3         | turq        | cysteine-serine-rich nuclear protein 1                                      |
| Cytip            | NM_001012086              | 10845407        | 1.68        | 39          | 0           | grey        | cytohesin 1 interacting protein                                             |
| Dab2ip           | NM_138710                 | 10835779        | 0.55        | -34         | 13.6        | turq        | DAB2 interacting protein                                                    |
| Dapp1            | NM_001108568              | 10826985        | 1.62        | 14          | 0           | grey        | dual adaptor of phosphotyrosine and 3-phosphoinositides                     |
| Dock7            | NM_001191574              | 10878221        | 0.71        | -65         | 15.7        | turq        | dedicator of cytokinesis 7                                                  |
| Dok4             | NM_001108438              | 10805976        | 0.59        | -20         | 1.2         | brwn        | docking protein 4                                                           |
| Entpd4           | NM_001108384              | 10781290        | 0.72        | -102        | 23.5        | turq        | ectonucleoside triphosphate diphosphohydrolase 4                            |
| Entpd6           | NM_053498                 | 10840684        | 0.47        | -72         | 32.5        | turq        | ectonucleoside triphosphate diphosphohydrolase 6                            |
| Ern1             | NM_001191926              | 10748314        | 0.37        | -112        | 23.2        | turq        | endoplasmic reticulum to nucleus signaling 1                                |
| Farp1            | NM_001107287              | 10782080        | 0.43        | -31         | 11.7        | turq        | FERM, RhoGEF (Arhgef) and pleckstrin domain protein 1 (chondrocyte-derived) |
| Fermt1           | NM_001106515              | 10850175        | 0.61        | -13         | 3.4         | ylw         | fermitin family homolog 1 (Drosophila)                                      |
| Glmn             | NM_001105993              | 10771049        | 1.41        | 25          | 7.1         | turq        | glomulin, FKBP associated protein                                           |
| Gpr107           | NM_001107828              | 10835303        | 0.69        | -141        | 22.0        | turq        | G protein-coupled receptor 107                                              |
| Gpr157           | NM_001012107              | 10874118        | 0.56        | -12         | 13.9        | turq        | G protein-coupled receptor 157                                              |
| Gprasp1          | NM_134386                 | 10940429        | 0.76        | -12         | 3.7         | turq        | G protein-coupled receptor associated sorting protein 1                     |
| Gprc5c           | BC168227                  | 10739455        | 0.43        | -88         | 0           | grey        | G protein-coupled receptor, family C, group 5, member C                     |
| Gria3            | NM_001112742              | 10936215        | 1.44        | 12          | 2.2         | turq        | glutamate receptor, ionotropic, AMPA 3                                      |
| Hyou1            | NM_138867                 | 10909482        | 0.36        | -639        | 35.3        | turq        | hypoxia up-regulated 1                                                      |
| Insig1           | NM_022392                 | 10861986        | 0.62        | -390        | 18.9        | turq        | insulin induced gene 1                                                      |
| Iqgap1           | NM_001108489              | 10723156        | 0.68        | -126        | 0           | grey        | IQ motif containing GTPase activating protein 1                             |
| Itgb4            | NM_013180                 | 10739721        | 0.44        | -33         | 0           | grey        | integrin, beta 4                                                            |
| Itpr3            | NM_013138                 | 10828516        | 0.38        | -41         | 21.3        | turq        | inositol 1,4,5-triphosphate receptor, type 3                                |
| LOC363328        | XR_007893                 | 10930988        | 0.59        | -13         | 0.90        | green       | similar to TICAM-1                                                          |
| Lpar3            | NM_023969                 | 10819705        | 0.64        | -60         | 0           | grey        | lysophosphatidic acid receptor 3                                            |
| Madd             | NM_053585                 | 10847308        | 0.56        | -30         | 23.4        | turq        | MAP-kinase activating death domain                                          |
| Mapk13           | NM_019231                 | 10828778        | 0.31        | -54         | 28.7        | turq        | mitogen activated protein kinase 13                                         |
| <b>Mapk8ip1</b>  | <b>NM_053777</b>          | <b>10847509</b> | <b>0.45</b> | <b>-114</b> | <b>42.6</b> | <b>turq</b> | <b>mitogen-activated protein kinase 8 interacting protein 1</b>             |
| Mare             | NM_001034936              | 10732592        | 0.54        | -46         | 37.4        | turq        | alpha globin regulatory element containing gene                             |
| Mark2            | NM_021699                 | 10728396        | 0.55        | -94         | 27.2        | turq        | MAP/microtubule affinity-regulating kinase 2                                |
| <b>Mbrl</b>      | <b>NM_001100886</b>       | <b>10893961</b> | <b>0.75</b> | <b>-120</b> | <b>45.9</b> | <b>turq</b> | <b>membralin</b>                                                            |
| Minpp1           | NM_019263                 | 10719148        | 0.39        | -84         | 13.6        | turq        | multiple inositol polyphosphate histidine phosphatase 1                     |
| Mlec             | NM_001013983              | 10759018        | 0.74        | -159        | 11.9        | turq        | malectin                                                                    |
| Ncln             | NM_001014082              | 10893484        | 0.57        | -102        | 17.7        | turq        | nicalin homolog (zebrafish)                                                 |
| Nkiras2          | NM_001105839              | 10738216        | 0.71        | -25         | 27.1        | turq        | NFKB inhibitor interacting Ras-like 2                                       |
| Pacsin2          | NM_130740                 | 10898179        | 0.62        | -188        | 0           | grey        | protein kinase C and casein kinase substrate in neurons 2                   |
| Pdp1             | NM_019372                 | 10875532        | 1.47        | 58          | 14.1        | turq        | pyruvate dehydrogenase phosphatase catalytic subunit 1                      |
| Pex26            | NM_001106618              | 10867065        | 0.67        | -53         | 10.3        | turq        | peroxisomal biogenesis factor 26                                            |
| <b>Pgap2</b>     | <b>NM_053895</b>          | <b>10709336</b> | <b>0.47</b> | <b>-200</b> | <b>44.1</b> | <b>turq</b> | <b>post-GPI attachment to proteins 2</b>                                    |
| Phlda1           | NM_017180                 | 10895406        | 0.61        | -29         | 2.70        | green       | pleckstrin homology-like domain, family A, member 1                         |
| Pi4k2a           | NM_053735                 | 10730312        | 0.74        | -74         | 10.0        | turq        | phosphatidylinositol 4-kinase type 2 alpha                                  |
| Pik3r2           | NM_022185                 | 10787472        | 0.71        | -27         | 5.6         | turq        | phosphoinositide-3-kinase, regulatory subunit 2 (beta)                      |
| Plekha7          | NM_001144861              | 10725078        | 0.66        | -11         | 0           | grey        | pleckstrin homology domain containing, family A member 7                    |
| Plekhm3          | ENSRNOT00000032782        | 10928535        | 0.52        | -56         | 7.6         | turq        | pleckstrin homology domain containing, family M, member 3                   |
| Ppp2r2a          | NM_053999                 | 10784702        | 0.78        | -90         | 15.0        | turq        | protein phosphatase 2 (formerly 2A), regulatory subunit B, alpha isoform    |
| Pprc1            | NM_001106363              | 10715706        | 0.71        | -15         | 6.7         | turq        | peroxisome proliferator-activated receptor gamma, coactivator-related 1     |
| <b>PrkcsH</b>    | <b>NM_001106806</b>       | <b>10908576</b> | <b>0.50</b> | <b>-276</b> | <b>52.1</b> | <b>turq</b> | <b>protein kinase C substrate 80K-H</b>                                     |
| <b>Psd3</b>      | <b>ENSRNOT00000068629</b> | <b>10787765</b> | <b>4.00</b> | <b>454</b>  | <b>40.3</b> | <b>turq</b> | <b>pleckstrin and Sec7 domain containing 3</b>                              |
| Psen1            | NM_019163                 | 10885808        | 0.58        | -291        | 36.6        | turq        | presenilin 1                                                                |
| Pskh1            | NM_001108897              | 10807430        | 0.65        | -27         | 15.0        | turq        | protein serine kinase H1                                                    |
| Pstpip2          | ENSRNOT00000022833        | 10802867        | 0.65        | -41         | 12.3        | turq        | proline-serine-threonine phosphatase-interacting protein 2                  |
| Ptpn1            | NM_012637                 | 10842475        | 0.62        | -87         | 14.7        | turq        | protein tyrosine phosphatase, non-receptor type 1                           |
| Ptpn23           | NM_057204                 | 10920422        | 0.77        | -16         | 1.10        | green       | protein tyrosine phosphatase, non-receptor type 23                          |
| Ptprc            | NM_138507                 | 10768138        | 1.64        | 69          | 17.6        | turq        | protein tyrosine phosphatase, receptor type, C                              |
| PtpRF            | NM_019249                 | 10879134        | 0.29        | -253        | 16.5        | turq        | protein tyrosine phosphatase, receptor type, F                              |

|                      |                     |                 |             |              |             |             |                                                                                             |
|----------------------|---------------------|-----------------|-------------|--------------|-------------|-------------|---------------------------------------------------------------------------------------------|
| Ptprk                | NM_001029902        | 10717118        | 0.48        | -172         | 8.2         | turq        | protein tyrosine phosphatase, receptor type, K, extracellular region                        |
| Ptpro                | NM_017336           | 10859342        | 1.96        | 18           | 0           | grey        | protein tyrosine phosphatase, receptor type, O                                              |
| Rab11fip1            | NM_001191555        | 10788720        | 0.37        | -45          | 19.2        | turq        | RAB11 family interacting protein 1 (class I)                                                |
| Rab21                | NM_001004238        | 10902393        | 0.73        | -186         | 12.6        | turq        | RAB21, member RAS oncogene family                                                           |
| Rab3a                | NM_013018           | 10790912        | 0.51        | -29          | 3.0         | turq        | RAB3A, member RAS oncogene family                                                           |
| Rab3gap2             | NM_001040154        | 10766468        | 0.71        | -51          | 28.4        | turq        | RAB3 GTPase activating protein subunit 2                                                    |
| Rabep2               | NM_030585           | 10710848        | 0.75        | -13          | 21.7        | turq        | rabaptin, RAB GTPase binding effector protein 2                                             |
| <b>Rabgga</b>        | <b>NM_031654</b>    | <b>10783898</b> | <b>0.58</b> | <b>-57</b>   | <b>47.0</b> | <b>turq</b> | <b>Rab geranylgeranyltransferase, alpha subunit</b>                                         |
| Rasal2               | NM_001107188        | 10769047        | 0.70        | -39          | 6.0         | turq        | RAS protein activator like 2                                                                |
| Rassf3               | NM_001108747        | 10902708        | 0.58        | -67          | 7.1         | turq        | Ras association (RalGDS/AF-6) domain family member 3                                        |
| RGD1306487           | ENSRNOT00000005289  | 10763636        | 0.79        | -88          | 25.9        | turq        | similar to RAB3 GTPase-activating protein                                                   |
| RGD1308221           | NM_001134539        | 10810341        | 0.35        | -69          | 2.1         | turq        | similar to TBC1 domain family, member 8 (with GRAM domain); vascular Rab-GAP/TBC-containing |
| RGD1565350           | ENSRNOT00000015338  | 10876531        | 0.69        | -11          | 0           | grey        | similar to Shb protein                                                                      |
| Rgnef                | NM_001108542        | 10820713        | 0.52        | -34          | 0           | grey        | Rho-guanine nucleotide exchange factor                                                      |
| Rgs18                | NM_001047084        | 10768357        | 2.84        | 160          | 37.0        | turq        | regulator of G-protein signaling 18                                                         |
| Rqcd1                | NM_001009357        | 10924326        | 0.81        | -23          | 1.4         | turq        | rcd1 (required for cell differentiation) homolog 1 (S. pombe)                               |
| Safb                 | NM_022394           | 10931414        | 0.70        | -68          | 28.6        | turq        | scaffold attachment factor B                                                                |
| Samsn1               | NM_130821           | 10752744        | 1.55        | 20           | 6.1         | turq        | SAM domain, SH3 domain and nuclear localization signals, 1                                  |
| Seli                 | NM_001134754        | 10889064        | 0.58        | -273         | 6.5         | turq        | selenoprotein I                                                                             |
| Sipa1l3              | ENSRNOT00000038929  | 10720506        | 0.37        | -92          | 16.4        | turq        | signal-induced proliferation-associated 1 like 3                                            |
| Smek2                | NM_001108367        | 10774681        | 1.28        | 180          | 17.1        | blue        | SMEK homolog 2, suppressor of mek1 (Dictyostelium)                                          |
| Spred2               | NM_001047094        | 10774345        | 0.57        | -29          | 0           | grey        | sprouty-related, EVH1 domain containing 2                                                   |
| Srp72                | NM_001170601        | 10719180        | 0.71        | -232         | 8.8         | turq        | signal recognition particle 72 (chr1)                                                       |
| Srp72                | NM_001170601        | 10776340        | 0.80        | -251         | 3.0         | turq        | signal recognition particle 72 (chr14)                                                      |
| <b>Srpr</b>          | <b>NM_001034150</b> | <b>10908944</b> | <b>0.53</b> | <b>-1047</b> | <b>46.1</b> | <b>turq</b> | <b>signal recognition particle receptor ('docking protein')</b>                             |
| Stim1                | NM_001108496        | 10709347        | 0.60        | -87          | 17.0        | turq        | stromal interaction molecule 1                                                              |
| Stk11ip              | NM_001106922        | 10924596        | 0.67        | -20          | 7.1         | turq        | serine/threonine kinase 11 interacting protein                                              |
| Strap                | NM_001011969        | 10859371        | 0.77        | -172         | 18.6        | turq        | serine/threonine kinase receptor associated protein                                         |
| Susd2                | NM_001106381        | 10832496        | 0.46        | -77          | 3.85        | green       | sushi domain containing 2                                                                   |
| Tbc1d10b             | NM_001108921        | 10725965        | 0.58        | -61          | 16.9        | turq        | TBC1 domain family, member 10b                                                              |
| Tbc1d15              | ENSRNOT00000005207  | 10902375        | 1.24        | 146          | 16.7        | turq        | TBC1 domain family, member 15                                                               |
| Tbc1d16              | XM_221188           | 10931651        | 0.42        | -25          | 10.4        | turq        | TBC1 domain family, member 16                                                               |
| Tbc1d22b             | NM_001025059        | 10828892        | 0.65        | -24          | 5.1         | turq        | TBC1 domain family, member 22B                                                              |
| <b>Tbc1d7</b>        | <b>NM_001108411</b> | <b>10794576</b> | <b>0.54</b> | <b>-52</b>   | <b>43.5</b> | <b>turq</b> | <b>TBC1 domain family, member 7</b>                                                         |
| Tbc1d8               | NM_001191067        | 10927612        | 0.47        | -57          | 0           | grey        | TBC1 domain family, member 8                                                                |
| Tbl3                 | NM_001008277        | 10741212        | 0.50        | -84          | 26.5        | turq        | transducin (beta)-like 3                                                                    |
| Tnk1                 | NM_001107012        | 10744254        | 0.42        | -18          | 1.5         | brwn        | tyrosine kinase, non-receptor, 1                                                            |
| Tnk2                 | NM_001008336        | 10754766        | 0.50        | -23          | 10.2        | turq        | tyrosine kinase, non-receptor, 2                                                            |
| Trib2                | NM_001108015        | 10889263        | 0.30        | -95          | 0           | grey        | tribbles homolog 2 (Drosophila)                                                             |
| Trim30               | ENSRNOT00000005203  | 10724391        | 1.98        | 10           | 6.4         | turq        | tripartite motif-containing 30                                                              |
| Vav3                 | NM_001191714        | 10818454        | 1.53        | 16           | 12.8        | turq        | vav 3 guanine nucleotide exchange factor                                                    |
| Ywhah                | NM_013052           | 10777829        | 0.79        | -74          | 13.7        | turq        | tyrosine 3-monooxygenase/tryptophan 5-monooxygenase activation protein, eta polypeptide     |
| Zmynd8               | NM_001100838        | 10851815        | 0.60        | -68          | 13.1        | turq        | zinc finger, MYND-type containing 8                                                         |
| <b>TRANSCRIPTION</b> |                     |                 |             |              |             |             |                                                                                             |
| Ahr                  | NM_013149           | 10889660        | 0.65        | -23          | 3.8         | turq        | aryl hydrocarbon receptor                                                                   |
| Ankrd22              | NM_001191638        | 10729771        | 0.45        | -23          | 5.1         | ylw         | ankyrin repeat domain 22                                                                    |
| Ankrd52              | NM_001191875        | 10893139        | 0.51        | -49          | 26.1        | turq        | ankyrin repeat domain 52                                                                    |
| Anks3                | NM_001009676        | 10731711        | 0.80        | -10          | 0           | grey        | ankyrin repeat and sterile alpha motif domain containing 3                                  |
| Atf6b                | NM_001002809        | 10831425        | 0.54        | -149         | 37.2        | turq        | activating transcription factor 6 beta                                                      |
| Brpf1                | NM_001191572        | 10857739        | 0.60        | -40          | 6.3         | turq        | bromodomain and PHD finger containing, 1                                                    |
| Ccdc142              | ENSRNOT00000035329  | 10856610        | 0.68        | -11          | 0           | grey        | coiled-coil domain containing 142                                                           |
| Ccdc46               | NM_001105849        | 10739277        | 1.99        | 61           | 27.3        | turq        | coiled-coil domain containing 46                                                            |
| Ccdc49               | NM_001108295        | 10746766        | 0.68        | -26          | 5.6         | turq        | coiled-coil domain containing 49                                                            |
| Ccdc55               | NM_001037189        | 10736476        | 1.68        | 108          | 10.4        | brwn        | coiled-coil domain containing 55                                                            |
| Ccdc6                | ENSRNOT00000032159  | 10832705        | 0.52        | -60          | 18.9        | turq        | coiled-coil domain containing 6                                                             |
| Ccdc71               | NM_001024904        | 10793137        | 0.69        | -22          | 9.7         | turq        | coiled-coil domain containing 71                                                            |
| Cdig2                | ENSRNOT00000016167  | 10803238        | 0.42        | -103         | 22.9        | turq        | Cdig2 protein                                                                               |
| Clip2                | NM_021997           | 10757810        | 0.46        | -17          | 0           | grey        | CAP-GLY domain containing linker protein 2                                                  |
| Ddx28                | NM_001108898        | 10810791        | 0.72        | -26          | 20.7        | turq        | DEAD (Asp-Glu-Ala-Asp) box polypeptide 28                                                   |
| Ddx31                | NM_001107824        | 10834875        | 0.71        | -19          | 6.3         | turq        | DEAD (Asp-Glu-Ala-Asp) box polypeptide 31                                                   |
| <b>Ddx54</b>         | <b>NM_001191548</b> | <b>10762275</b> | <b>0.62</b> | <b>-37</b>   | <b>58.2</b> | <b>turq</b> | <b>DEAD (Asp-Glu-Ala-Asp) box polypeptide 54</b>                                            |
| Ddx60                | ENSRNOT00000019667  | 10791358        | 2.51        | 48           | 15.1        | turq        | DEAD (Asp-Glu-Ala-Asp) box polypeptide 60                                                   |
| Dexi                 | NM_001109026        | 10731514        | 0.48        | -159         | 37.1        | turq        | dexamethasone-induced transcript                                                            |
| Dnajc10              | NM_001106486        | 10837201        | 0.57        | -676         | 0           | grey        | DnaJ (Hsp40) homolog, subfamily C, member 10                                                |
| <b>Dnajc16</b>       | <b>NM_001014194</b> | <b>10881178</b> | <b>0.56</b> | <b>-76</b>   | <b>45.7</b> | <b>turq</b> | <b>DnaJ (Hsp40) homolog, subfamily C, member 16</b>                                         |
| Fbxl20               | NM_022272           | 10746856        | 0.59        | -98          | 0           | grey        | F-box and leucine-rich repeat protein 20                                                    |
| Fbxo28               | NM_001107203        | 10770434        | 0.69        | -115         | 24.0        | turq        | F-box protein 28                                                                            |

|                |                     |                 |             |             |             |             |                                                                                                |
|----------------|---------------------|-----------------|-------------|-------------|-------------|-------------|------------------------------------------------------------------------------------------------|
| Foxo3          | NM_001106395        | 10833814        | 0.67        | -49         | 21.9        | turq        | forkhead box O3                                                                                |
| Foxp4          | NM_001108788        | 10921408        | 0.51        | -25         | 12.0        | turq        | forkhead box P4                                                                                |
| <b>Gatad2a</b> | <b>NM_001013881</b> | <b>10787666</b> | <b>0.62</b> | <b>-122</b> | <b>45.5</b> | <b>turq</b> | <b>GATA zinc finger domain containing 2A</b>                                                   |
| Gse1           | ENSRNOT00000023607  | 10808407        | 0.59        | -23         | 0           | grey        | genetic suppressor element 1                                                                   |
| Gtf3c4         | NM_001109473        | 10844064        | 0.75        | -24         | 0           | grey        | general transcription factor IIC, polypeptide 4                                                |
| Hip1r          | NM_001134763        | 10761758        | 0.51        | -38         | 24.1        | turq        | huntingtin interacting protein 1 related                                                       |
| Hoxb3          | NM_001107042        | 10737730        | 0.72        | -13         | 0           | grey        | homeo box B3                                                                                   |
| Ing3           | NM_001034107        | 10853918        | 1.33        | 45          | 0           | grey        | inhibitor of growth family, member 3                                                           |
| Jund           | NM_138875           | 10790948        | 0.53        | -56         | 4.8         | turq        | jun D proto-oncogene                                                                           |
| Klf13          | NM_001109147        | 10722549        | 0.55        | -37         | 9.9         | turq        | Kruppel-like factor 13                                                                         |
| Klhl32         | ENSRNOT00000050653  | 10875771        | 0.56        | -15         | 0           | grey        | kelch-like 32 (Drosophila)                                                                     |
| Ldoc1          | ENSRNOT00000004529  | 10935662        | 0.22        | -38         | 0           | grey        | leucine zipper, down-regulated in cancer 1                                                     |
| Litaf          | NM_001105735        | 10731493        | 0.43        | -114        | 7.9         | turq        | lipopolysaccharide-induced TNF factor                                                          |
| LOC100362324   | ENSRNOT00000013854  | 10813058        | 0.67        | -78         | 8.9         | turq        | DEAH (Asp-Glu-Ala-His) box polypeptide 29                                                      |
| LOC100363014   | ENSRNOT00000010676  | 10887259        | 0.71        | -57         | 4.6         | turq        | REST corepressor 1-like                                                                        |
| LOC100363361   | ENSRNOT00000028553  | 10824904        | 0.79        | -15         | 5.7         | turq        | zinc finger protein 687-like                                                                   |
| LOC100365635   | XR_085597           | 10767160        | 1.63        | 23          | 6.0         | brwn        | ankyrin repeat domain 49-like                                                                  |
| LOC684558      | ENSRNOT00000027268  | 10787579        | 0.70        | -74         | 34.3        | turq        | similar to regulator of nonsense transcripts 1                                                 |
| LOC686781      | ENSRNOT00000047105  | 10704819        | 0.44        | -29         | 10.8        | turq        | similar to NFkB interacting protein 1                                                          |
| <b>Mad2l2</b>  | <b>NM_001012106</b> | <b>10873918</b> | <b>0.54</b> | <b>-68</b>  | <b>45.0</b> | <b>turq</b> | <b>MAD2 mitotic arrest deficient-like 2 (yeast)</b>                                            |
| Matr3          | NM_019149           | 10707749        | 1.48        | 570         | 33.5        | turq        | matrin 3 (chr1)                                                                                |
| Matr3          | NM_019149           | 10781787        | 1.48        | 626         | 23.2        | turq        | matrin 3 (chr15)                                                                               |
| <b>Matr3</b>   | <b>NM_019149</b>    | <b>10800943</b> | <b>1.47</b> | <b>553</b>  | <b>38.9</b> | <b>turq</b> | <b>matrin 3 (chr18)</b>                                                                        |
| Mcts2          | XM_002726252        | 10840888        | 1.60        | 109         | 7.7         | turq        | malignant T cell amplified sequence 2                                                          |
| Med13l         | GU566026            | 10762389        | 0.69        | -49         | 23.1        | turq        | mediator complex subunit 13-like                                                               |
| Med16          | NM_001106768        | 10893983        | 0.80        | -51         | 8.1         | turq        | mediator complex subunit 16                                                                    |
| Med25          | NM_001170426        | 10721517        | 0.73        | -54         | 24.3        | turq        | mediator complex subunit 25                                                                    |
| Mllt4          | NM_013217           | 10703189        | 0.73        | -72         | 3.6         | turq        | myeloid/lymphoid or mixed-lineage leukemia (trithorax homolog, Drosophila); translocated to, 4 |
| Morc3          | NM_001107109        | 10750373        | 1.23        | 47          | 27.2        | turq        | MORC family CW-type zinc finger 3                                                              |
| Mpp2           | NM_053513           | 10747716        | 0.54        | -15         | 3.79        | green       | membrane protein, palmitoylated 2 (MAGUK p55 subfamily member 2)                               |
| Mta1           | NM_022588           | 10887593        | 0.72        | -59         | 17.8        | turq        | metastasis associated 1                                                                        |
| Ndr3           | NM_001013923        | 10851219        | 0.66        | -78         | 0           | grey        | N-myc downstream regulated gene 3                                                              |
| Nfe2l1         | NM_001108293        | 10746602        | 0.69        | -213        | 16.3        | turq        | nuclear factor, erythroid derived 2,-like 1                                                    |
| Nfil3          | NM_053727           | 10794225        | 0.66        | -13         | 0           | grey        | nuclear factor, interleukin 3 regulated                                                        |
| <b>Nfix</b>    | <b>NM_030866</b>    | <b>10806665</b> | <b>0.58</b> | <b>-222</b> | <b>38.7</b> | <b>turq</b> | <b>nuclear factor I/X (CCAAT-binding transcription factor)</b>                                 |
| Noc4l          | NM_001014129        | 10759342        | 0.61        | -29         | 33.4        | turq        | nucleolar complex associated 4 homolog (S. cerevisiae)                                         |
| N-pac          | NM_001007800        | 10731668        | 0.70        | -168        | 26.5        | turq        | cytokine-like nuclear factor n-pac                                                             |
| Os9            | NM_001007265        | 10902892        | 0.57        | -269        | 16.9        | turq        | osteosarcoma amplified 9                                                                       |
| Pdlim1         | NM_017365           | 10730057        | 0.49        | -155        | 18.4        | turq        | PDZ and LIM domain 1                                                                           |
| Pelp1          | NM_001024270        | 10744441        | 0.70        | -33         | 23.1        | turq        | proline, glutamic acid and leucine rich protein 1                                              |
| Polr3e         | NM_001108503        | 10710513        | 0.80        | -28         | 2.5         | turq        | polymerase (RNA) III (DNA directed) polypeptide E                                              |
| Pols           | NM_001107333        | 10793317        | 0.68        | -22         | 3.7         | turq        | polymerase (DNA directed) sigma                                                                |
| Sart3          | NM_001107156        | 10759179        | 0.73        | -18         | 19.9        | turq        | squamous cell carcinoma antigen recognized by T-cells 3                                        |
| Scyl3          | NM_001191828        | 10765152        | 0.77        | -54         | 0           | grey        | SCY1-like 3 (S. cerevisiae)                                                                    |
| <b>Snd1</b>    | <b>NM_022694</b>    | <b>10854056</b> | <b>0.49</b> | <b>-237</b> | <b>55.0</b> | <b>turq</b> | <b>staphylococcal nuclease and tudor domain containing 1</b>                                   |
| Sp6            | NM_001108833        | 10737772        | 0.64        | -12         | 0           | grey        | Sp6 transcription factor                                                                       |
| Spty2d1        | ENSRNOT00000008420  | 10862747        | 0.62        | -34         | 6.8         | blue        | SPT2, Suppressor of Ty, domain containing 1 (S. cerevisiae)                                    |
| Src            | NM_031977           | 10841624        | 0.43        | -42         | 0           | grey        | v-src sarcoma (Schmidt-Ruppin A-2) viral oncogene homolog (avian)                              |
| <b>Sreb2</b>   | <b>NM_001033694</b> | <b>10898091</b> | <b>0.42</b> | <b>-183</b> | <b>51.8</b> | <b>turq</b> | <b>sterol regulatory element binding transcription factor 2</b>                                |
| Srf            | NM_001109302        | 10921550        | 0.68        | -52         | 9.1         | turq        | serum response factor (c-fos serum response element-binding transcription factor)              |
| Ssr1           | NM_001008891        | 10794721        | 0.62        | -261        | 36.0        | turq        | signal sequence receptor, alpha                                                                |
| Stat2          | NM_001011905        | 10893067        | 0.69        | -52         | 17.2        | turq        | signal transducer and activator of transcription 2                                             |
| Stx16          | NM_001108610        | 10842635        | 0.73        | -45         | 14.5        | turq        | syntaxin 16                                                                                    |
| Taf1d          | NM_001014207        | 10908089        | 1.58        | 89          | 19.8        | turq        | TATA box binding protein (TBP)-associated factor, RNA polymerase I, D, 41kDa                   |
| Tceb3          | NM_017103           | 10880665        | 0.83        | -54         | 9.6         | turq        | transcription elongation factor B (SIII), polypeptide 3                                        |
| Tcf3           | NM_001107865        | 10863277        | 0.59        | -36         | 0           | grey        | transcription factor 3                                                                         |
| Tcfap2c        | NM_201420           | 10842551        | 0.43        | -17         | 0           | grey        | transcription factor AP-2, gamma                                                               |
| Tcfcp2l1       | NM_001107170        | 10763531        | 0.47        | -48         | 10.2        | turq        | transcription factor CP2-like 1                                                                |
| Tinf2          | NM_001006962        | 10783868        | 1.28        | 26          | 0           | grey        | TERF1 (TRF1)-interacting nuclear factor 2                                                      |
| Trip4          | NM_001134981        | 10918302        | 1.34        | 99          | 7.1         | turq        | thyroid hormone receptor interactor 4                                                          |
| Tssc4          | NM_001013194        | 10712528        | 0.62        | -21         | 0           | grey        | tumor suppressing subtransferable candidate 4                                                  |
| Zbtb24         | NM_001098667        | 10830505        | 0.57        | -11         | 0           | grey        | zinc finger and BTB domain containing 24                                                       |
| Zc3h7b         | NM_001130695        | 10897970        | 0.66        | -80         | 24.3        | turq        | zinc finger CCCH-type containing 7B                                                            |
| Zdhc24         | NM_001039100        | 10712950        | 0.38        | -36         | 16.6        | turq        | zinc finger, DHHC-type containing 24                                                           |
| Zdhc6          | NM_001037652        | 10730946        | 0.71        | -146        | 7.6         | turq        | zinc finger, DHHC-type containing 6                                                            |
| Zdhc9          | NM_001039016        | 10939570        | 0.52        | -109        | 20.9        | turq        | zinc finger, DHHC-type containing 9                                                            |
| Zfat           | NM_001134957        | 10904202        | 1.85        | 39          | 0           | grey        | zinc finger and AT hook domain containing                                                      |

|                                               |                           |                 |             |             |             |             |                                                                                     |
|-----------------------------------------------|---------------------------|-----------------|-------------|-------------|-------------|-------------|-------------------------------------------------------------------------------------|
| Zfhx2                                         | NM_001098803              | 10783755        | 0.72        | -11         | 0           | grey        | zinc finger homeobox 2                                                              |
| Zfhx3                                         | ENSRNOT00000019408        | 10807688        | 0.48        | -48         | 22.8        | turq        | zinc finger homeobox 3                                                              |
| Zfp169                                        | ENSRNOT00000022932        | 10794448        | 0.61        | -13         | 0           | grey        | zinc finger protein 169                                                             |
| Zfp185                                        | ENSRNOT00000023109        | 10935854        | 0.37        | -62         | 11.1        | turq        | zinc finger protein 185                                                             |
| Zfp212                                        | ENSRNOT00000009054        | 10855203        | 0.72        | -25         | 5.3         | turq        | Zinc finger protein 212                                                             |
| Zfp280b                                       | NM_001106384              | 10832460        | 0.72        | -19         | 1.0         | turq        | zinc finger protein 280b                                                            |
| Zfp354c                                       | NM_023988                 | 10742450        | 1.77        | 13          | 9.1         | turq        | zinc finger protein 354C                                                            |
| Zfp36                                         | NM_133290                 | 10720215        | 0.63        | -63         | 10.7        | turq        | zinc finger protein 36                                                              |
| Zfp426                                        | NM_001079943              | 10915324        | 1.43        | 48          | 22.3        | turq        | zinc finger protein 426                                                             |
| Zfp458                                        | NM_001024299              | 10814151        | 1.87        | 28          | 20.2        | turq        | zinc finger protein 458                                                             |
| Zfp46                                         | NM_001106691              | 10872991        | 0.50        | -76         | 12.2        | turq        | zinc finger protein 46                                                              |
| Zfp462                                        | ENSRNOT00000047225        | 10876831        | 0.63        | -34         | 1.90        | green       | zinc finger protein 462                                                             |
| Zfp70911                                      | ENSRNOT00000042498        | 10893420        | 1.55        | 171         | 36.6        | turq        | zinc finger protein 709-like 1                                                      |
| Zfp800                                        | NM_001109225              | 10861399        | 1.31        | 56          | 0           | grey        | zinc finger protein 800                                                             |
| Zfp9                                          | NM_001127635              | 10864972        | 0.60        | -21         | 0           | grey        | zinc finger protein 9                                                               |
| Zmat3                                         | NM_022548                 | 10814717        | 0.62        | -14         | 4.5         | turq        | zinc finger, matrin type 3                                                          |
| Znf598                                        | NM_001105770              | 10732167        | 0.61        | -60         | 25.0        | turq        | zinc finger protein 598                                                             |
| Znf652                                        | NM_001080207              | 10737651        | 0.73        | -77         | 11.9        | turq        | zinc finger protein 652                                                             |
| Znf746                                        | NM_001100852              | 10862388        | 0.81        | -15         | 0           | grey        | zinc finger protein 746                                                             |
| Znf76                                         | NM_001134755              | 10828687        | 0.61        | -31         | 7.4         | turq        | zinc finger protein 76 (expressed in testis)                                        |
| Zswim3                                        | NM_001107801              | 10842197        | 0.68        | -10         | 0           | grey        | zinc finger, SWIM-type containing 3                                                 |
| <b>TRANSLATION &amp; PROTEIN MODIFICATION</b> |                           |                 |             |             |             |             |                                                                                     |
| <b>Aars</b>                                   | <b>NM_001100517</b>       | <b>10808041</b> | <b>0.60</b> | <b>-263</b> | <b>43.6</b> | <b>turq</b> | <b>alanyl-tRNA synthetase</b>                                                       |
| Aimp2                                         | NM_001037348              | 10756692        | 0.62        | -104        | 10.0        | blue        | aminoacyl tRNA synthetase complex-interacting multifunctional protein 2             |
| <b>Ap3d1</b>                                  | <b>NM_001100719</b>       | <b>10893706</b> | <b>0.63</b> | <b>-223</b> | <b>38.5</b> | <b>turq</b> | <b>adaptor-related protein complex 3, delta 1 subunit</b>                           |
| Arf3                                          | NM_080904                 | 10906944        | 0.59        | -333        | 15.1        | turq        | ADP-ribosylation factor 3                                                           |
| Arfgef1                                       | ENSRNOT00000007766        | 10867254        | 0.65        | -217        | 9.3         | turq        | ADP-ribosylation factor guanine nucleotide-exchange factor 1(brefeldin A-inhibited) |
| Bat2                                          | NM_212462                 | 10828046        | 0.72        | -59         | 25.7        | turq        | HLA-B associated transcript 2                                                       |
| Cpeb4                                         | NM_001106992              | 10741814        | 0.78        | -103        | 6.3         | turq        | cytoplasmic polyadenylation element binding protein 4                               |
| Dph1                                          | NM_001105809              | 10744907        | 0.41        | -47         | 11.2        | turq        | DPH1 homolog ( <i>S. cerevisiae</i> )                                               |
| Eef2                                          | NM_017245                 | 10900306        | 0.70        | -1112       | 19.7        | turq        | eukaryotic translation elongation factor 2                                          |
| Eif1                                          | NM_001105837              | 10738170        | 0.49        | -73         | 2.0         | brwn        | eukaryotic translation initiation factor 1                                          |
| Eif2b1                                        | NM_172029                 | 10758219        | 0.83        | -52         | 22.1        | turq        | eukaryotic translation initiation factor 2B, subunit 1 alpha                        |
| Eif2c2                                        | NM_021597                 | 10904358        | 0.70        | -78         | 9.1         | turq        | eukaryotic translation initiation factor 2C, 2                                      |
| Eif3j                                         | NM_001077670              | 10788079        | 0.79        | -287        | 7.7         | turq        | eukaryotic translation initiation factor 3, subunit J                               |
| Eif4e2                                        | NM_001108808              | 10925004        | 0.82        | -49         | 15.1        | turq        | eukaryotic translation initiation factor 4E family member 2                         |
| Eif4ebp2                                      | NM_001033069              | 10833147        | 0.56        | -178        | 30.4        | turq        | eukaryotic translation initiation factor 4E binding protein 2                       |
| <b>Eif4g1</b>                                 | <b>ENSRNOT00000040029</b> | <b>10755323</b> | <b>0.64</b> | <b>-330</b> | <b>55.2</b> | <b>turq</b> | <b>eukaryotic translation initiation factor 4 gamma, 1 (chr11)</b>                  |
| <b>Eif4g1</b>                                 | <b>ENSRNOT00000040029</b> | <b>10822489</b> | <b>0.65</b> | <b>-340</b> | <b>51.6</b> | <b>turq</b> | <b>eukaryotic translation initiation factor 4 gamma, 1 (chr2)</b>                   |
| Eif4g2                                        | NM_001017374              | 10724923        | 0.83        | -637        | 5.5         | turq        | eukaryotic translation initiation factor 4, gamma 2 (chr1)                          |
| Eif4g2                                        | NM_001017374              | 10922257        | 0.83        | -672        | 6.1         | turq        | eukaryotic translation initiation factor 4, gamma 2 (chr9)                          |
| Eif4g2                                        | NM_001017374              | 10931777        | 0.83        | -637        | 5.9         | turq        | eukaryotic translation initiation factor 4, gamma 2 (chrUn)                         |
| Eif4h                                         | NM_001006957              | 10757786        | 0.80        | -116        | 31.1        | turq        | eukaryotic translation initiation factor 4H                                         |
| Eif6                                          | NM_001037352              | 10778386        | 0.66        | -85         | 8.5         | turq        | eukaryotic translation initiation factor 6                                          |
| Elac1                                         | NM_001107406              | 10805181        | 0.69        | -16         | 0           | grey        | elaC homolog 1 ( <i>E. coli</i> )                                                   |
| <b>Elac2</b>                                  | <b>NM_172326</b>          | <b>10734395</b> | <b>0.54</b> | <b>-88</b>  | <b>52.4</b> | <b>turq</b> | <b>elaC homolog 2 (<i>E. coli</i>)</b>                                              |
| Ftsjd2                                        | NM_001014031              | 10828913        | 0.74        | -83         | 27.3        | turq        | FtsJ methyltransferase domain containing 2                                          |
| Gemin8                                        | NM_001007756              | 10937678        | 0.58        | -55         | 15.9        | turq        | gem (nuclear organelle) associated protein 8                                        |
| Hnrnp3                                        | NM_001108532              | 10832869        | 1.47        | 108         | 4.4         | blue        | heterogeneous nuclear ribonucleoprotein H3 (2H9)                                    |
| Hnrph1                                        | NM_080896                 | 10733243        | 1.25        | 239         | 0.8         | pink        | heterogeneous nuclear ribonucleoprotein H1                                          |
| <b>Iars</b>                                   | <b>NM_001100572</b>       | <b>10797597</b> | <b>0.55</b> | <b>-158</b> | <b>37.9</b> | <b>turq</b> | <b>isoleucyl-tRNA synthetase</b>                                                    |
| LOC362473                                     | ENSRNOT00000004476        | 10867320        | 0.81        | -21         | 7.1         | turq        | similar to Elongation factor 1-gamma (EF-1-gamma) (eEF-1B gamma)                    |
| LOC690096                                     | ENSRNOT00000012255        | 10774432        | 0.69        | -28         | 0           | grey        | similar to ribosomal protein L28                                                    |
| Mrps27                                        | NM_001108543              | 10812722        | 0.78        | -27         | 7.5         | turq        | mitochondrial ribosomal protein S27                                                 |
| Npm1                                          | NM_012992                 | 10741907        | 1.69        | 900         | 3.6         | turq        | nucleophosmin (nucleolar phosphoprotein B23, numatrin) (chr10)                      |
| Npm1                                          | NM_012992                 | 10799502        | 1.24        | 254         | 7.2         | turq        | nucleophosmin (nucleolar phosphoprotein B23, numatrin) (chr17)                      |
| Npm1                                          | NM_012992                 | 10893361        | 1.32        | 440         | 9.8         | turq        | nucleophosmin (nucleolar phosphoprotein B23, numatrin) (chr7)                       |
| Oasl2                                         | NM_001009682              | 10762747        | 2.98        | 34          | 5.1         | turq        | 2'-5' oligoadenylate synthetase-like 2                                              |
| <b>Pabpc4</b>                                 | <b>NM_001100538</b>       | <b>10871750</b> | <b>0.53</b> | <b>-394</b> | <b>54.3</b> | <b>turq</b> | <b>poly(A) binding protein, cytoplasmic 4</b>                                       |
| Parp1                                         | NM_013063                 | 10766170        | 0.72        | -74         | 34.5        | turq        | poly (ADP-ribose) polymerase 1                                                      |
| Pdia3                                         | NM_017319                 | 10839154        | 0.76        | -1233       | 14.4        | turq        | protein disulfide isomerase family A, member 3                                      |
| Pnn                                           | NM_001109023              | 10884740        | 1.42        | 151         | 17.3        | blue        | pinin, desmosome associated protein                                                 |
| Puf60                                         | NM_001191880              | 10904756        | 0.71        | -185        | 21.3        | turq        | poly-U binding splicing factor 60                                                   |
| Qtrtd1                                        | ENSRNOT00000000317        | 10751196        | 0.73        | -14         | 0           | grey        | queuine tRNA-ribosyltransferase domain containing 1                                 |
| Rae1                                          | NM_001033708              | 10842577        | 0.77        | -54         | 35.1        | turq        | RAE1 RNA export 1 homolog ( <i>S. pombe</i> )                                       |
| Rbm47                                         | NM_001005882              | 10772657        | 0.54        | -305        | 7.5         | turq        | RNA binding motif protein 47                                                        |
| RGD1561871                                    | ENSRNOT00000046453        | 10895702        | 0.72        | -12         | 0           | grey        | similar to ribosomal protein S10                                                    |
| Rnps1                                         | NM_001011890              | 10732058        | 0.73        | -108        | 18.8        | turq        | ribonucleic acid binding protein S1                                                 |



|                                    |                           |                 |              |             |             |              |                                                                          |
|------------------------------------|---------------------------|-----------------|--------------|-------------|-------------|--------------|--------------------------------------------------------------------------|
| <b>Rpl7a</b>                       | <b>NM_001114391</b>       | <b>10753737</b> | <b>2.25</b>  | <b>76</b>   | <b>28.9</b> | <b>blue</b>  | <b>ribosomal protein L7a</b>                                             |
| Rpusd4                             | NM_001025284              | 10908960        | 0.56         | -23         | 3.3         | turq         | RNA pseudouridylation synthase domain containing 4                       |
| Scap                               | NM_001100966              | 10913640        | 0.36         | -180        | 34.0        | turq         | SREBF chaperone                                                          |
| Taf6                               | NM_001044225              | 10760846        | 0.83         | -24         | 9.8         | turq         | TAF6 RNA polymerase II, TATA box binding protein (TBP)-associated factor |
| Tars2                              | NM_001014040              | 10825042        | 0.60         | -56         | 18.9        | turq         | threonyl-tRNA synthetase 2, mitochondrial (putative)                     |
| Tfip11                             | NM_001008291              | 10806158        | 0.71         | -35         | 17.4        | turq         | tuftelin interacting protein 11                                          |
| Trpt1                              | NM_001106331              | 10713472        | 0.66         | -14         | 2.2         | turq         | tRNA phosphotransferase 1                                                |
| Tyw1                               | NM_001107137              | 10761311        | 0.71         | -58         | 16.6        | turq         | tRNA-yW synthesizing protein 1 homolog (S. cerevisiae)                   |
| Wars                               | NM_001013170              | 10892152        | 0.74         | -103        | 3.94        | green        | tryptophanyl-tRNA synthetase                                             |
| Yars                               | NM_001025696              | 10872291        | 0.71         | -108        | 21.3        | turq         | tyrosyl-tRNA synthetase                                                  |
| <b>MISCELLANEOUS &amp; UNKNOWN</b> |                           |                 |              |             |             |              |                                                                          |
| Ccdc85c                            | ENSRNOT00000045676        | 10892130        | 0.82         | -14         | 9.6         | turq         | coiled-coil domain containing 85C                                        |
| Clptm1l                            | NM_001108240              | 10717536        | 0.67         | -429        | 26.8        | turq         | CLPTM1-like                                                              |
| Crip2                              | NM_022501                 | 10937241        | 0.36         | -174        | 19.8        | turq         | cysteine-rich protein 2                                                  |
| Dtwd1                              | NM_001013921              | 10839438        | 1.50         | 18          | 0           | grey         | DTW domain containing 1                                                  |
| Erich1                             | NM_001127680              | 10789381        | 0.61         | -21         | 0           | grey         | glutamate-rich 1                                                         |
| <b>Fam108c1</b>                    | <b>NM_001100736</b>       | <b>10723413</b> | <b>0.64</b>  | <b>-53</b>  | <b>38.4</b> | <b>turq</b>  | <b>family with sequence similarity 108, member C1</b>                    |
| Fam116b                            | NM_001108749              | 10906208        | 0.59         | -16         | 32.7        | turq         | family with sequence similarity 116, member B                            |
| Fam120a                            | NM_001191816              | 10794394        | 0.69         | -119        | 12.3        | turq         | family with sequence similarity 120A                                     |
| Fam155b                            | ENSRNOT00000057920        | 10934180        | 0.33         | -35         | 0           | grey         | family with sequence similarity 155, member B                            |
| Fam160b1                           | ENSRNOT00000023247        | 10716303        | 0.61         | -45         | 7.2         | turq         | family with sequence similarity 160, member B1                           |
| Fam189a1                           | ENSRNOT00000031488        | 10722580        | 0.42         | -18         | 2.6         | turq         | family with sequence similarity 189, member A1                           |
| Fam20b                             | NM_001107187              | 10769005        | 0.58         | -209        | 13.9        | turq         | family with sequence similarity 20, member B                             |
| <b>Ints3</b>                       | <b>ENSRNOT00000020575</b> | <b>10824624</b> | <b>0.59</b>  | <b>-111</b> | <b>40.7</b> | <b>turq</b>  | <b>integrator complex subunit 3</b>                                      |
| Ints5                              | NM_001107576              | 10713703        | 0.65         | -25         | 6.8         | brwn         | integrator complex subunit 5                                             |
| <b>LOC100125385</b>                | <b>NM_001103364</b>       | <b>10897239</b> | <b>0.58</b>  | <b>-78</b>  | <b>41.5</b> | <b>turq</b>  | <b>hypothetical protein LOC100125385</b>                                 |
| <b>LOC300308</b>                   | <b>NM_001013952</b>       | <b>10894414</b> | <b>18.82</b> | <b>337</b>  | <b>####</b> | <b>green</b> | <b>similar to hypothetical protein 4930509022</b>                        |
| LOC306766                          | NM_001014007              | 10794172        | 0.67         | -119        | 8.1         | turq         | hypothetical LOC306766                                                   |
| LOC683674                          | ENSRNOT00000039191        | 10756740        | 0.56         | -68         | 34.5        | turq         | similar to Protein C7orf26 homolog                                       |
| <b>MGC93975</b>                    | <b>BC079041</b>           | <b>10721350</b> | <b>0.57</b>  | <b>-230</b> | <b>42.4</b> | <b>turq</b>  | <b>similar to 2310044H10Rik protein</b>                                  |
| <b>MGC94190</b>                    | <b>BC090318</b>           | <b>10761329</b> | <b>0.52</b>  | <b>-177</b> | <b>48.5</b> | <b>turq</b>  | <b>similar to 0610007L01Rik protein</b>                                  |
| Nsmce2                             | NM_001024876              | 10896785        | 1.26         | 111         | 5.4         | turq         | non-SMC element 2, MMS21 homolog (S. cerevisiae)                         |
| Omp                                | NM_012616                 | 10723805        | 0.33         | -22         | 0           | grey         | olfactory marker protein                                                 |
| Rcan3                              | NM_001012746              | 10880610        | 0.51         | -30         | 9.4         | turq         | RCAN family member 3                                                     |
| Rftn2                              | ENSRNOT00000020910        | 10928167        | 1.64         | 21          | 9.7         | turq         | raftlin family member 2                                                  |
| RGD1303117                         | NR_037147                 | 10720415        | 0.56         | -47         | 15.2        | turq         | hypothetical protein LOC292764                                           |
| RGD1304810                         | NM_001107314              | 10791983        | 0.51         | -26         | 3.9         | brwn         | similar to 6430573F11Rik protein                                         |
| RGD1305455                         | NM_001024969              | 10760877        | 0.58         | -24         | 9.1         | turq         | similar to hypothetical protein FLJ10925                                 |
| RGD1305572                         | NM_001024970              | 10766226        | 0.75         | -57         | 23.2        | turq         | similar to hypothetical protein MGC30618                                 |
| RGD1306151                         | NM_001108652              | 10859282        | 0.33         | -85         | 34.1        | turq         | similar to hypothetical protein DKFZp761D0211                            |
| RGD1306271                         | ENSRNOT00000040391        | 10861946        | 0.66         | -11         | 1.9         | turq         | similar to KIAA1549 protein                                              |
| RGD1306717                         | NM_001107756              | 10847825        | 0.79         | -22         | 15.7        | turq         | similar to hypothetical protein MGC25461                                 |
| RGD1307264                         | ENSRNOT00000049592        | 10828614        | 0.61         | -34         | 20.9        | turq         | similar to hypothetical protein FLJ20302; similar to CG31653-PA          |
| <b>RGD1307394</b>                  | <b>NM_001108308</b>       | <b>10739832</b> | <b>0.46</b>  | <b>-123</b> | <b>47.8</b> | <b>turq</b>  | <b>similar to hypothetical protein ET</b>                                |
| RGD1307615                         | NM_001108573              | 10843530        | 0.62         | -114        | 25.1        | turq         | similar to hypothetical protein FLJ13045                                 |
| RGD1307983                         | ENSRNOT00000022987        | 10877206        | 0.75         | -43         | 6.2         | turq         | similar to HSPC043 protein                                               |
| RGD1308616                         | ENSRNOT00000068128        | 10879213        | 0.68         | -10         | 0           | grey         | similar to KIAA0467 protein                                              |
| RGD1308759                         | NM_001106077              | 10787646        | 0.79         | -32         | 10.8        | turq         | similar to KIAA0892 protein                                              |
| RGD1309492                         | NM_001108044              | 10886157        | 0.74         | -33         | 10.7        | turq         | similar to mKIAA1737 protein                                             |
| RGD1310348                         | NM_001108323              | 10752309        | 0.39         | -134        | 11.5        | brwn         | similar to Ser/Thr-rich protein T10 in DGCR region                       |
| RGD1311493                         | ENSRNOT00000028407        | 10747777        | 0.53         | -45         | 10.1        | turq         | similar to CG13379-PA                                                    |
| <b>RGD1311849</b>                  | <b>ENSRNOT00000058387</b> | <b>10869843</b> | <b>0.58</b>  | <b>-84</b>  | <b>45.8</b> | <b>turq</b>  | <b>similar to mKIAA1797 protein</b>                                      |
| RGD1559904                         | NM_001107915              | 10875503        | 0.78         | -47         | 5.4         | turq         | similar to mKIAA1429 protein                                             |
| RGD1560909                         | BC158750                  | 10922771        | 0.72         | -54         | 23.9        | turq         | similar to DNA segment, Chr 1, Brigham & Womens Genetics 0212 expressed  |
| RGD1561149                         | NM_001134629              | 10879978        | 0.53         | -22         | 0           | grey         | similar to mKIAA1522 protein                                             |
| RGD1561878                         | ENSRNOT00000045241        | 10841033        | 1.31         | 35          | 5.6         | blue         | similar to mKIAA0978 protein                                             |
| RGD1562310                         | NM_001109066              | 10762420        | 0.64         | -14         | 18.9        | turq         | similar to hypothetical protein FLJ21415                                 |
| RGD1562657                         | ENSRNOT00000036185        | 10713081        | 0.60         | -35         | 16.9        | turq         | similar to hypothetical protein DKFZp761E198                             |
| RGD1563422                         | NM_001077643              | 10765293        | 1.43         | 197         | 6.3         | turq         | similar to Brain protein 44                                              |
| <b>RGD1564742</b>                  | <b>ENSRNOT00000041819</b> | <b>10894438</b> | <b>15.84</b> | <b>258</b>  | <b>####</b> | <b>green</b> | <b>similar to hypothetical protein 4930509022</b>                        |
| Rtn4ip1                            | NM_001107644              | 10830630        | 0.75         | -50         | 4.3         | turq         | reticulon 4 interacting protein 1                                        |
| <b>Samd9l</b>                      | <b>ENSRNOT00000013044</b> | <b>10860815</b> | <b>2.35</b>  | <b>200</b>  | <b>48.8</b> | <b>turq</b>  | <b>sterile alpha motif domain containing 9-like</b>                      |
| Spata13                            | NM_001191686              | 10780871        | 0.70         | -16         | 4.9         | turq         | spermatogenesis associated 13                                            |
| Tctn3                              | ENSRNOT00000020455        | 10730116        | 0.44         | -51         | 7.7         | turq         | tectonic family member 3                                                 |
| Tdrd3                              | NM_001012043              | 10781752        | 1.57         | 110         | 18.0        | turq         | tudor domain containing 3                                                |
| Tecpr2                             | ENSRNOT00000030864        | 10887239        | 0.64         | -16         | 17.4        | turq         | tectonin beta-propeller repeat containing 2                              |
| Tm4sf1                             | NM_001106434              | 10823278        | 2.56         | 195         | 0           | grey         | transmembrane 4 L six family member 1                                    |
| <b>Tm9sf2</b>                      | <b>NM_001005554</b>       | <b>10782126</b> | <b>0.72</b>  | <b>-519</b> | <b>47.4</b> | <b>turq</b>  | <b>transmembrane 9 superfamily member 2</b>                              |
| <b>Tm9sf4</b>                      | <b>NM_001025649</b>       | <b>10840990</b> | <b>0.69</b>  | <b>-155</b> | <b>47.2</b> | <b>turq</b>  | <b>transmembrane 9 superfamily protein member 4</b>                      |

|                           |                     |                 |             |             |             |             |                                                                                               |
|---------------------------|---------------------|-----------------|-------------|-------------|-------------|-------------|-----------------------------------------------------------------------------------------------|
| Tmem102                   | ENSRNOT00000020578  | 10744233        | 0.53        | -11         | 13.5        | turq        | transmembrane protein 102                                                                     |
| Tmem129                   | NM_001126274        | 10773590        | 0.60        | -88         | 3.8         | turq        | transmembrane protein 129                                                                     |
| Tmem192                   | NM_001014141        | 10791318        | 0.71        | -54         | 0           | grey        | transmembrane protein 192                                                                     |
| Tmem2                     | NM_001107596        | 10714353        | 0.45        | -90         | 6.9         | turq        | transmembrane protein 2                                                                       |
| Tmem200b                  | ENSRNOT00000047917  | 10872529        | 0.40        | -26         | 0           | grey        | transmembrane protein 200B                                                                    |
| Tmem201                   | ENSRNOT00000047763  | 10881801        | 0.72        | -14         | 21.6        | turq        | transmembrane protein 201                                                                     |
| Tmem63a                   | NM_001134496        | 10766253        | 0.38        | -79         | 20.0        | turq        | transmembrane protein 63a                                                                     |
| Tmem82                    | ENSRNOT00000016176  | 10881133        | 0.49        | -26         | 16.2        | turq        | transmembrane protein 82                                                                      |
| Trim25                    | NM_001009536        | 10737411        | 0.64        | -94         | 0           | grey        | tripartite motif-containing 25                                                                |
| Trim32                    | NM_001012103        | 10869530        | 0.80        | -12         | 6.0         | blue        | tripartite motif-containing 32                                                                |
| Tsku                      | NM_001009965        | 10723822        | 0.55        | -55         | 0           | grey        | tsukushin                                                                                     |
| Ttc17                     | BC168714            | 10847668        | 0.50        | -109        | 8.8         | turq        | tetratricopeptide repeat domain 17                                                            |
| Wdr24                     | NM_001191084        | 10732500        | 0.61        | -25         | 17.1        | turq        | WD repeat domain 24                                                                           |
| Wdr75                     | ENSRNOT00000005230  | 10923127        | 0.52        | -42         | 14.8        | turq        | WD repeat domain 75                                                                           |
| <b>Wipi2</b>              | <b>NM_001007615</b> | <b>10760468</b> | <b>0.62</b> | <b>-106</b> | <b>54.7</b> | <b>turq</b> | <b>WD repeat domain, phosphoinositide interacting 2</b>                                       |
| Wwc1                      | ENSRNOT00000011061  | 10742048        | 0.51        | -36         | 0           | grey        | WW and C2 domain containing 1                                                                 |
| Wwc2                      | NM_001109111        | 10788101        | 0.70        | -39         | 7.4         | turq        | WW and C2 domain containing 2                                                                 |
| <b>Zinki</b>              | <b>NM_001142758</b> | <b>10759488</b> | <b>1.48</b> | <b>108</b>  | <b>43.2</b> | <b>turq</b> | <b>Arg3.1/Arc mRNA-binding zinc finger protein</b>                                            |
| <b>EST's</b>              |                     |                 |             |             |             |             |                                                                                               |
| LOC498750                 | BC089212            | 10856187        | 0.77        | -174        | 12.6        | turq        | similar to cDNA sequence BC005537                                                             |
| MGC72612                  | NM_001009538        | 10787710        | 1.38        | 48          | 10.1        | turq        | similar to expressed sequence AI449175                                                        |
| RGD1304827                | NM_001009437        | 10914407        | 0.51        | -24         | 9.7         | turq        | hypothetical LOC316091                                                                        |
| RGD1304884                | NM_001107436        | 10808393        | 0.37        | -111        | 22.3        | turq        | similar to RIKEN cDNA 6430548M08                                                              |
| RGD1305007                | NM_001013976        | 10749778        | 0.70        | -33         | 9.8         | turq        | similar to RIKEN cDNA 1110031I02                                                              |
| RGD1306284                | BC086594            | 10739826        | 0.48        | -53         | 19.8        | turq        | similar to RIKEN cDNA 1110005A03                                                              |
| RGD1307752                | NM_001013922        | 10873258        | 0.69        | -103        | 19.0        | turq        | similar to RIKEN cDNA 1110008F13                                                              |
| RGD1309594                | BC085944            | 10832253        | 0.77        | -21         | 0           | grey        | similar to RIKEN cDNA 1810043G02; DNA segment, Chr 10, Johns Hopkins University 13, expressed |
| RGD1310230                | NM_001039015        | 10924762        | 1.47        | 309         | 0           | grey        | similar to RIKEN cDNA 5230400G24                                                              |
| RGD1310862                | ENSRNOT00000028186  | 10741831        | 1.32        | 106         | 32.9        | turq        | similar to adult retina protein                                                               |
| RGD1310951                | ENSRNOT00000022866  | 10869282        | 0.60        | -25         | 1.01        | green       | similar to RIKEN cDNA E130308A19                                                              |
| RGD1311257                | BC083697            | 10829359        | 0.72        | -16         | 1.03        | green       | similar to C21orf70 protein                                                                   |
| RGD1359158                | BC093390            | 10729331        | 1.32        | 97          | 11.5        | turq        | similar to RIKEN cDNA 1110059E24 (chr1)                                                       |
| RGD1359158                | BC093390            | 10877994        | 1.38        | 126         | 19.6        | turq        | similar to RIKEN cDNA 1110059E24 (chr5)                                                       |
| RGD1560277                | ENSRNOT00000032429  | 10708167        | 0.50        | -60         | 23.9        | turq        | similar to RIKEN cDNA D330012F22 gene                                                         |
| RGD1561557                | NM_001108929        | 10829351        | 1.25        | 12          | 24.4        | blue        | similar to chromosome 21 open reading frame 29                                                |
| RGD1565222                | NM_001109101        | 10783592        | 0.75        | -14         | 2.3         | turq        | similar to RIKEN cDNA 4931414P19                                                              |
| RGD1566266                | NM_001177613        | 10758599        | 0.71        | -27         | 16.1        | turq        | similar to hypothetical protein FLJ21127                                                      |
| U15425                    | 10701862            | 0.61            | -30         | 0           | grey        | (chr1)      |                                                                                               |
| U15425                    | 10828861            | 0.66            | -39         | 0           | grey        | (chr20)     |                                                                                               |
| U15425                    | 10850255            | 0.66            | -39         | 0           | grey        | (chr3)      |                                                                                               |
| U15425                    | 10874216            | 0.66            | -39         | 0           | grey        | (chr5)      |                                                                                               |
| U15425                    | 10910193            | 0.66            | -39         | 0           | grey        | (chr8)      |                                                                                               |
| NC_001665                 | 10930560            | 2.01            | 1259        | 13.8        | turq        |             |                                                                                               |
| NC_001665                 | 10930580            | 2.59            | 1250        | 2.8         | mgnt        |             |                                                                                               |
| GENSCAN00000039363        | 10727226            | 1.58            | 32          | 0           | grey        |             |                                                                                               |
| GENSCAN00000029030        | 10812214            | 1.44            | 32          | 10.9        | blue        |             |                                                                                               |
| FQ235271                  | 10860801            | 2.37            | 59          | 20.1        | turq        |             |                                                                                               |
| FQ233235                  | 10875100            | 1.43            | 16          | 2.5         | blue        |             |                                                                                               |
| FQ228887                  | 10872572            | 1.49            | 10          | 4.3         | turq        |             |                                                                                               |
| <b>FQ213989</b>           | <b>10886864</b>     | <b>1.80</b>     | <b>32</b>   | <b>46.7</b> | <b>turq</b> |             |                                                                                               |
| FQ213737                  | 10931252            | 0.55            | -86         | 17.1        | turq        |             |                                                                                               |
| <b>FQ212998</b>           | <b>10886986</b>     | <b>1.97</b>     | <b>48</b>   | <b>42.4</b> | <b>turq</b> |             |                                                                                               |
| <b>ENSRNOT00000070327</b> | <b>10805227</b>     | <b>1.47</b>     | <b>385</b>  | <b>45.2</b> | <b>turq</b> |             |                                                                                               |
| ENSRNOT00000069482        | 10805225            | 1.36            | 644         | 34.7        | turq        |             |                                                                                               |
| ENSRNOT00000069136        | 10933753            | 2.08            | 19          | 11.4        | blue        |             |                                                                                               |
| ENSRNOT00000068960        | 10904356            | 0.62            | -10         | 11.4        | blue        |             |                                                                                               |
| ENSRNOT00000064161        | 10929321            | 1.33            | 10          | 7.3         | turq        |             |                                                                                               |
| ENSRNOT00000060779        | 10741074            | 0.47            | -15         | 3.0         | turq        |             |                                                                                               |
| ENSRNOT00000060493        | 10794544            | 0.55            | -141        | 7.6         | turq        |             |                                                                                               |
| ENSRNOT00000059354        | 10751428            | 0.52            | -11         | 5.7         | blue        |             |                                                                                               |
| ENSRNOT00000056514        | 10706289            | 0.76            | -14         | 0           | grey        |             |                                                                                               |
| <b>ENSRNOT00000056375</b> | <b>10897272</b>     | <b>0.50</b>     | <b>-149</b> | <b>45.3</b> | <b>turq</b> |             |                                                                                               |
| ENSRNOT00000056130        | 10920498            | 0.61            | -16         | 7.6         | turq        |             |                                                                                               |
| ENSRNOT00000055440        | 10859772            | 0.63            | -13         | 0           | grey        |             |                                                                                               |
| ENSRNOT00000054633        | 10901811            | 0.72            | -10         | 1.8         | brwn        |             |                                                                                               |
| ENSRNOT00000054567        | 10856162            | 0.71            | -19         | 4.7         | blue        |             |                                                                                               |
| ENSRNOT00000054532        | 10819467            | 0.58            | -15         | 17.1        | blue        |             |                                                                                               |
| ENSRNOT00000054150        | 10863359            | 0.60            | -12         | 2.2         | ylw         |             |                                                                                               |

|  |                           |                 |             |            |             |              |         |
|--|---------------------------|-----------------|-------------|------------|-------------|--------------|---------|
|  | <b>ENSRNOT00000054133</b> | <b>10886872</b> | <b>2.17</b> | <b>56</b>  | <b>52.6</b> | <b>turq</b>  |         |
|  | <b>ENSRNOT00000054054</b> | <b>10886998</b> | <b>2.17</b> | <b>56</b>  | <b>52.6</b> | <b>turq</b>  |         |
|  | ENSRNOT00000054033        | 10733721        | 0.66        | -13        | 0           | grey         |         |
|  | <b>ENSRNOT00000054021</b> | <b>10886946</b> | <b>2.15</b> | <b>61</b>  | <b>45.1</b> | <b>turq</b>  |         |
|  | <b>ENSRNOT00000053882</b> | <b>10722421</b> | <b>1.72</b> | <b>87</b>  | <b>12.7</b> | <b>black</b> |         |
|  | <b>ENSRNOT00000053832</b> | <b>10886878</b> | <b>2.17</b> | <b>56</b>  | <b>52.6</b> | <b>turq</b>  |         |
|  | <b>ENSRNOT00000053573</b> | <b>10886964</b> | <b>2.10</b> | <b>34</b>  | <b>44.3</b> | <b>turq</b>  |         |
|  | ENSRNOT00000053557        | 10916961        | 0.67        | -10        | 6.2         | ylw          |         |
|  | <b>ENSRNOT00000053450</b> | <b>10908100</b> | <b>1.76</b> | <b>533</b> | <b>43.3</b> | <b>turq</b>  |         |
|  | ENSRNOT00000053274        | 10754642        | 1.41        | 19         | 10.5        | blue         |         |
|  | ENSRNOT00000053081        | 10722479        | 0.67        | -11        | 11.8        | blue         |         |
|  | ENSRNOT00000053070        | 10886848        | 2.97        | 34         | 30.3        | turq         |         |
|  | ENSRNOT00000053006        | 10910762        | 1.81        | 58         | 12.5        | blue         |         |
|  | ENSRNOT00000052678        | 10731193        | 1.77        | 50         | 0           | grey         |         |
|  | <b>ENSRNOT00000052603</b> | <b>10792348</b> | <b>0.60</b> | <b>-21</b> | <b>30.7</b> | <b>blue</b>  |         |
|  | <b>ENSRNOT00000052564</b> | <b>10722431</b> | <b>1.53</b> | <b>72</b>  | <b>11.2</b> | <b>black</b> |         |
|  | ENSRNOT00000050135        | 10837097        | 0.50        | -56        | 4.7         | turq         |         |
|  | ENSRNOT00000048438        | 10786415        | 0.54        | -11        | 0           | grey         |         |
|  | ENSRNOT00000048403        | 10744828        | 0.55        | -14        | 0           | grey         |         |
|  | ENSRNOT00000048078        | 10801778        | 1.35        | 22         | 5.8         | blue         |         |
|  | ENSRNOT00000048037        | 10892490        | 0.55        | -13        | 0           | grey         |         |
|  | ENSRNOT00000047825        | 10890930        | 0.73        | -15        | 8.0         | blue         |         |
|  | ENSRNOT00000046708        | 10719104        | 0.70        | -14        | 3.8         | turq         |         |
|  | ENSRNOT00000046555        | 10892346        | 1.25        | 15         | 3.8         | blue         |         |
|  | ENSRNOT00000044832        | 10817985        | 0.72        | -15        | 1.5         | turq         |         |
|  | ENSRNOT00000042956        | 10823109        | 0.68        | -16        | 0           | grey         |         |
|  | ENSRNOT00000042764        | 10820004        | 0.74        | -12        | 0           | grey         |         |
|  | <b>ENSRNOT00000042657</b> | <b>10814176</b> | <b>0.57</b> | <b>-17</b> | <b>31.1</b> | <b>blue</b>  |         |
|  | ENSRNOT00000042358        | 10779954        | 0.62        | -27        | 0           | grey         |         |
|  | ENSRNOT00000041811        | 10877530        | 0.49        | -16        | 0           | grey         |         |
|  | ENSRNOT00000041141        | 10867488        | 0.67        | -34        | 0           | grey         |         |
|  | ENSRNOT00000040550        | 10755985        | 0.75        | -11        | 1.14        | green        |         |
|  | ENSRNOT00000039311        | 10789806        | 1.71        | 62         | 3.2         | brwn         |         |
|  | ENSRNOT00000037540        | 10703508        | 0.35        | -84        | 0           | grey         | (chr1)  |
|  | ENSRNOT00000037540        | 10766998        | 0.35        | -99        | 0           | grey         | (chr13) |
|  | ENSRNOT00000037540        | 10781962        | 0.36        | -83        | 0           | grey         | (chr15) |
|  | ENSRNOT00000037540        | 10864711        | 0.36        | -83        | 0           | grey         | (chr4)  |
|  | ENSRNOT00000036804        | 10828378        | 0.54        | -26        | 0           | grey         |         |
|  | ENSRNOT00000035090        | 10940003        | 0.61        | -15        | 30.3        | turq         |         |
|  | ENSRNOT00000034750        | 10710063        | 1.49        | 30         | 1.3         | brwn         |         |
|  | ENSRNOT00000032085        | 10722546        | 0.64        | -12        | 0           | grey         |         |
|  | ENSRNOT00000031409        | 10850625        | 2.18        | 23         | 3.65        | green        |         |
|  | ENSRNOT00000031056        | 10909123        | 0.67        | -11        | 4.1         | turq         |         |
|  | ENSRNOT00000030546        | 10766918        | 0.67        | -17        | 3.4         | turq         |         |
|  | ENSRNOT00000030319        | 10878432        | 0.83        | -17        | 0           | grey         |         |
|  | ENSRNOT00000029708        | 10822431        | 0.67        | -20        | 2.9         | ylw          |         |
|  | ENSRNOT00000029274        | 10803222        | 0.61        | -29        | 4.9         | brwn         |         |
|  | ENSRNOT00000028670        | 10728193        | 0.62        | -87        | 7.7         | turq         |         |
|  | ENSRNOT00000026047        | 10724013        | 0.52        | -24        | 16.6        | turq         |         |
|  | ENSRNOT00000025799        | 10869165        | 0.60        | -31        | 1.97        | green        |         |
|  | ENSRNOT00000025790        | 10804783        | 0.81        | -69        | 15.4        | turq         |         |
|  | ENSRNOT00000025728        | 10724047        | 0.68        | -10        | 11.7        | blue         |         |
|  | ENSRNOT00000025594        | 10717933        | 0.62        | -182       | 5.0         | turq         |         |
|  | ENSRNOT00000021070        | 10842200        | 0.59        | -59        | 19.9        | turq         |         |
|  | ENSRNOT00000020754        | 10863355        | 0.81        | -11        | 0           | grey         |         |
|  | ENSRNOT00000008661        | 10939079        | 0.66        | -20        | 2.3         | brwn         |         |
|  | ENSRNOT00000008623        | 10895391        | 1.27        | 45         | 4.4         | turq         |         |
|  | ENSRNOT00000005644        | 10746483        | 0.61        | -22        | 9.2         | turq         |         |
|  | ENSRNOT00000004088        | 10740617        | 0.63        | -84        | 13.3        | turq         |         |
|  | ENSRNOT00000003373        | 10733067        | 1.53        | 71         | 8.4         | brwn         |         |
|  | ENSRNOT00000001562        | 10762723        | 0.71        | -101       | 32.5        | turq         |         |
|  | ENSRNOT00000020098        | 10701709        | 0.72        | -143       | 0           | grey         |         |
|  | BC090353                  | 10728028        | 1.49        | 808        | 11.2        | blue         |         |
|  | <b>AB014881</b>           | <b>10886924</b> | <b>2.17</b> | <b>56</b>  | <b>52.6</b> | <b>turq</b>  |         |
|  | <b>AB014879</b>           | <b>10886908</b> | <b>2.17</b> | <b>56</b>  | <b>52.6</b> | <b>turq</b>  |         |
|  | <b>AB014878</b>           | <b>10886954</b> | <b>2.17</b> | <b>56</b>  | <b>52.6</b> | <b>turq</b>  |         |
|  | <b>AB014877</b>           | <b>10886918</b> | <b>2.17</b> | <b>56</b>  | <b>52.6</b> | <b>turq</b>  |         |
|  | ---                       | <b>10862453</b> | <b>2.54</b> | <b>213</b> | <b>26.9</b> | <b>blue</b>  |         |
|  | ---                       | 10788099        | 0.62        | -12        | 23.1        | blue         |         |

|     |                 |             |              |             |             |
|-----|-----------------|-------------|--------------|-------------|-------------|
| --- | 10939699        | 1.66        | 31           | 3.7         | blue        |
| --- | 10823419        | 0.49        | -39          | 0           | grey        |
| --- | 10875062        | 0.61        | -24          | 0           | grey        |
| --- | 10800513        | 0.68        | -23          | 0           | grey        |
| --- | 10837617        | 0.41        | -19          | 0           | grey        |
| --- | 10871661        | 0.41        | -15          | 0           | grey        |
| --- | 10922266        | 0.52        | -14          | 0           | grey        |
| --- | 10874328        | 0.49        | -68          | 22.0        | turq        |
| --- | 10812130        | 0.71        | -40          | 21.8        | turq        |
| --- | 10715344        | 0.43        | -48          | 19.9        | turq        |
| --- | 10912629        | 0.48        | -61          | 16.6        | turq        |
| --- | 10811898        | 1.67        | 331          | 14.7        | turq        |
| --- | 10854284        | 0.52        | -30          | 12.9        | turq        |
| --- | 10781238        | 1.68        | 15           | 7.1         | turq        |
| --- | 10924717        | 0.71        | -16          | 4.9         | turq        |
| --- | 10705102        | 0.69        | -14          | 1.3         | turq        |
| --- | 10750452        | 1.20        | 14           | 1.9         | ylw         |
| --- | <b>10700398</b> | <b>1.75</b> | <b>333</b>   | <b>33.8</b> | <b>blue</b> |
| --- | 10701605        | 2.80        | 897          | 18.4        | blue        |
| --- | 10700525        | 2.18        | 1805         | 17.1        | blue        |
| --- | 10700873        | 1.99        | 1969         | 16.2        | blue        |
| --- | 10700831        | 1.74        | 61           | 15.2        | blue        |
| --- | 10701404        | 1.28        | 880          | 15.0        | blue        |
| --- | 10700423        | 1.96        | 58           | 11.1        | blue        |
| --- | 10701507        | 1.99        | 58           | 10.4        | blue        |
| --- | 10700415        | 2.06        | 50           | 10.2        | blue        |
| --- | 10700473        | 1.53        | 79           | 8.5         | blue        |
| --- | 10701134        | 1.64        | 15           | 6.8         | blue        |
| --- | 10700853        | 0.60        | -15          | 6.1         | blue        |
| --- | 10700448        | 0.73        | -99          | 5.7         | blue        |
| --- | 10700537        | 2.11        | 56           | 5.6         | blue        |
| --- | 10701317        | 0.46        | -16          | 5.5         | blue        |
| --- | 10700643        | 0.54        | -18          | 5.4         | blue        |
| --- | 10701346        | 1.62        | 15           | 3.0         | blue        |
| --- | 10701369        | 0.63        | -18          | 2.8         | blue        |
| --- | 10700195        | 0.42        | -15          | 2.15        | green       |
| --- | 10700479        | 0.66        | -192         | 0           | grey        |
| --- | 10701044        | 0.70        | -120         | 0           | grey        |
| --- | 10701407        | 0.52        | -27          | 0           | grey        |
| --- | 10701529        | 0.72        | -23          | 0           | grey        |
| --- | 10701444        | 0.61        | -20          | 0           | grey        |
| --- | 10700906        | 0.48        | -17          | 0           | grey        |
| --- | 10700921        | 0.43        | -15          | 0           | grey        |
| --- | 10701027        | 0.50        | -11          | 0           | grey        |
| --- | 10701552        | 0.45        | -11          | 0           | grey        |
| --- | 10701287        | 0.38        | -11          | 0           | grey        |
| --- | 10700773        | 1.56        | 10           | 0           | grey        |
| --- | 10701125        | 1.52        | 12           | 0           | grey        |
| --- | 10701495        | 1.94        | 13           | 0           | grey        |
| --- | 10701304        | 2.08        | 14           | 0           | grey        |
| --- | 10700579        | 1.49        | 15           | 0           | grey        |
| --- | 10701062        | 1.73        | 22           | 0           | grey        |
| --- | 10701563        | 2.66        | 38           | 0           | grey        |
| --- | 10700558        | 2.21        | 58           | 0           | grey        |
| --- | 10700311        | 2.12        | 63           | 0           | grey        |
| --- | 10701432        | 4.34        | 70           | 0           | grey        |
| --- | 10700828        | 2.23        | 96           | 0           | grey        |
| --- | <b>10700160</b> | <b>0.60</b> | <b>-1277</b> | <b>42.0</b> | <b>turq</b> |
| --- | 10700258        | 0.63        | -1178        | 34.0        | turq        |
| --- | 10700880        | 0.50        | -1405        | 32.1        | turq        |
| --- | 10701239        | 0.44        | -361         | 28.6        | turq        |
| --- | 10701313        | 0.56        | -366         | 27.8        | turq        |
| --- | 10700969        | 0.61        | -622         | 25.5        | turq        |
| --- | 10701109        | 0.51        | -216         | 21.3        | turq        |
| --- | 10700438        | 1.88        | 119          | 21.3        | turq        |
| --- | 10700806        | 0.61        | -1058        | 21.2        | turq        |
| --- | 10700138        | 0.65        | -170         | 19.1        | turq        |
| --- | 10700929        | 0.57        | -157         | 18.7        | turq        |
| --- | 10701566        | 0.71        | -1150        | 18.3        | turq        |

|     |          |      |       |      |      |  |
|-----|----------|------|-------|------|------|--|
| --- | 10700299 | 0.64 | -1023 | 17.6 | turq |  |
| --- | 10700791 | 1.63 | 1593  | 17.6 | turq |  |
| --- | 10700279 | 0.59 | -1726 | 17.5 | turq |  |
| --- | 10700304 | 0.73 | -763  | 13.9 | turq |  |
| --- | 10700451 | 0.52 | -128  | 13.8 | turq |  |
| --- | 10700340 | 0.62 | -565  | 13.8 | turq |  |
| --- | 10700101 | 0.33 | -213  | 13.4 | turq |  |
| --- | 10701390 | 0.74 | -349  | 13.4 | turq |  |
| --- | 10701431 | 0.62 | -157  | 12.4 | turq |  |
| --- | 10701312 | 0.58 | -1494 | 11.9 | turq |  |
| --- | 10701509 | 1.71 | 90    | 9.8  | turq |  |
| --- | 10700879 | 0.42 | -265  | 8.7  | turq |  |
| --- | 10700151 | 2.38 | 63    | 8.0  | turq |  |
| --- | 10701257 | 0.34 | -89   | 7.9  | turq |  |
| --- | 10701022 | 2.00 | 12    | 7.2  | turq |  |
| --- | 10700759 | 2.38 | 44    | 6.8  | turq |  |
| --- | 10700637 | 0.58 | -98   | 5.9  | turq |  |
| --- | 10701554 | 0.83 | -958  | 5.6  | turq |  |
| --- | 10701356 | 2.50 | 16    | 5.0  | turq |  |
| --- | 10701576 | 2.16 | 19    | 3.5  | turq |  |
| --- | 10701018 | 2.15 | 33    | 2.9  | turq |  |
| --- | 10701124 | 0.75 | -956  | 2.7  | turq |  |
| --- | 10701525 | 1.60 | 27    | 2.2  | turq |  |
| --- | 10700812 | 2.47 | 25    | 2.1  | ylw  |  |

#### J. Seminal Vesicles

| Gene Symbol               | RefSeq/GenBank/<br>Ensemble Number | Affymetrix<br>Probset ID | V/C  | Mean<br>Diff. | k.in | Mod  | Gene Title                                                              |
|---------------------------|------------------------------------|--------------------------|------|---------------|------|------|-------------------------------------------------------------------------|
| <b>APOPTOSIS</b>          |                                    |                          |      |               |      |      |                                                                         |
| Dap3                      | NM_001011950                       | 10824373                 | 0.83 | -28           | 3.9  | brwn | death associated protein 3                                              |
| <b>CELL CYCLE</b>         |                                    |                          |      |               |      |      |                                                                         |
| Ccnl2                     | NM_001013094                       | 10874708                 | 0.74 | -88           | 6.1  | blue | cyclin L2                                                               |
| Egr1                      | NM_012551                          | 10800919                 | 1.48 | 14            | 0    | grey | early growth response 1                                                 |
| Sfi1                      | NM_001191682                       | 10777878                 | 0.76 | -15           | 0    | grey | Sfi1 homolog, spindle assembly associated (yeast)                       |
| <b>CYTOSKELETON-ECM</b>   |                                    |                          |      |               |      |      |                                                                         |
| Amigo3                    | NM_178144                          | 10913153                 | 0.68 | -12           | 5.1  | brwn | adhesion molecule with Ig like domain 3                                 |
| Hook2                     | NM_001100562                       | 10809998                 | 0.76 | -17           | 2.8  | brwn | hook homolog 2 (Drosophila)                                             |
| Krtcap2                   | NM_001106444                       | 10816760                 | 0.78 | -124          | 18.0 | turq | keratinocyte associated protein 2                                       |
| Repin1                    | NM_001005893                       | 10855367                 | 1.32 | 22            | 2.1  | ylw  | replication initiator 1                                                 |
| Rpain                     | NM_001033060                       | 10735400                 | 1.22 | 30            | 0    | grey | RPA interacting protein                                                 |
| Sdc4                      | NM_012649                          | 10851599                 | 1.22 | 151           | 0    | grey | syndecan 4                                                              |
| Vcp                       | NM_053864                          | 10876224                 | 0.82 | -350          | 36.2 | turq | valosin-containing protein                                              |
| <b>DEVELOPMENT</b>        |                                    |                          |      |               |      |      |                                                                         |
| Fis1                      | NM_001105919                       | 10757448                 | 1.27 | 117           | 0    | grey | fission 1 (mitochondrial outer membrane) homolog (S. cerevisiae)        |
| Lmbr1l                    | NM_001013950                       | 10907062                 | 0.80 | -18           | 0    | grey | limb region 1-like homolog (mouse)                                      |
| Ltv1                      | NM_001014157                       | 10716884                 | 0.81 | -25           | 0    | grey | LTV1 homolog (S. cerevisiae)                                            |
| Myadm                     | NM_183332                          | 10718591                 | 1.26 | 23            | 7.2  | brwn | myeloid-associated differentiation marker                               |
| Osr2                      | NM_001012118                       | 10896108                 | 1.57 | 12            | 0    | grey | odd-skipped related 2 (Drosophila)                                      |
| RGD1566325                | ENSRNOT00000024149                 | 10796900                 | 1.43 | 43            | 10.0 | turq | similar to regulator of sex-limitation candidate 16                     |
| Rrm2b                     | NM_001130543                       | 10903391                 | 0.83 | -64           | 8.0  | brwn | ribonucleotide reductase M2 B (TP53 inducible)                          |
| Scrib                     | NM_001191879                       | 10904714                 | 0.78 | -24           | 38.8 | turq | scribbled homolog (Drosophila)                                          |
| Spats2l                   | NM_001014102                       | 10923381                 | 1.40 | 24            | 9.9  | blue | spermatogenesis associated, serine-rich 2-like                          |
| Zpbp2                     | NM_001007011                       | 10738015                 | 0.63 | -30           | 0    | grey | zona pellucida binding protein 2                                        |
| <b>DNA REPAIR</b>         |                                    |                          |      |               |      |      |                                                                         |
| Cry2                      | NM_133405                          | 10847525                 | 1.24 | 57            | 14.4 | turq | cryptochrome 2 (photolyase-like)                                        |
| <b>ELECTRON TRANSPORT</b> |                                    |                          |      |               |      |      |                                                                         |
| Cybrd1                    | NM_001011954                       | 10836788                 | 1.29 | 15            | 1.8  | brwn | cytochrome b reductase 1                                                |
| Txnip                     | NM_001008767                       | 10817552                 | 1.21 | 376           | 3.0  | turq | thioredoxin interacting protein                                         |
| <b>EPIGENETICS</b>        |                                    |                          |      |               |      |      |                                                                         |
| Chd8                      | NM_022933                          | 10783280                 | 0.82 | -21           | 0    | grey | chromodomain helicase DNA binding protein 8                             |
| Ddx5                      | NM_001007613                       | 10748347                 | 0.81 | -435          | 0    | grey | DEAD (Asp-Glu-Ala-Asp) box polypeptide 5                                |
| Hist1h2bf                 | ENSRNOT00000049626                 | 10795282                 | 1.31 | 12            | 0    | grey | histone cluster 1, H2bf                                                 |
| Hist2h2bb                 | ENSRNOT00000042005                 | 10817539                 | 1.26 | 23            | 3.3  | ylw  | histone cluster 2, H2bb                                                 |
| <b>GOLGI APPARATUS</b>    |                                    |                          |      |               |      |      |                                                                         |
| Cog4                      | NM_001108449                       | 10808014                 | 0.73 | -99           | 8.7  | brwn | component of oligomeric golgi complex 4                                 |
| Dpm1                      | NM_001106544                       | 10851997                 | 0.83 | -100          | 0.7  | pink | dolichyl-phosphate mannosyltransferase polypeptide 1, catalytic subunit |
| Golga5                    | NM_001033065                       | 10886465                 | 0.80 | -46           | 14.2 | brwn | golgi autoantigen, golgin subfamily a, 5                                |
| Golgb1                    | NM_138885                          | 10754311                 | 0.78 | -30           | 1.8  | brwn | golgi autoantigen, golgin subfamily b, macrogolgin 1                    |

|                                         |                    |          |      |      |      |      |                                                                                    |
|-----------------------------------------|--------------------|----------|------|------|------|------|------------------------------------------------------------------------------------|
| Uso1                                    | NM_019379          | 10775821 | 0.79 | -169 | 9.6  | brwn | USO1 homolog, vesicle docking protein (yeast)                                      |
| <b>GROWTH FACTORS</b>                   |                    |          |      |      |      |      |                                                                                    |
| Igf2r                                   | NM_012756          | 10702996 | 0.76 | -101 | 46.4 | turq | insulin-like growth factor 2 receptor                                              |
| <b>IMMUNE RESPONSE</b>                  |                    |          |      |      |      |      |                                                                                    |
| C3ar1                                   | NM_032060          | 10865369 | 1.43 | 17   | 16.9 | brwn | complement component 3a receptor 1                                                 |
| Cd68                                    | NM_001031638       | 10744127 | 1.59 | 52   | 19.9 | brwn | Cd68 molecule                                                                      |
| F5                                      | NM_001047878       | 10765212 | 1.37 | 11   | 0    | grey | coagulation factor V (proaccelerin, labile factor)                                 |
| <b>METABOLISM &amp; TRANSPORT</b>       |                    |          |      |      |      |      |                                                                                    |
| Abhd5                                   | NM_212524          | 10914066 | 1.34 | 122  | 9.0  | brwn | abhydrolase domain containing 5                                                    |
| Acbd4                                   | NM_001012013       | 10738657 | 1.27 | 16   | 1.5  | brwn | acyl-Coenzyme A binding domain containing 4                                        |
| Agpat9                                  | NM_001025670       | 10775519 | 1.67 | 55   | 7.6  | brwn | 1-acylglycerol-3-phosphate O-acyltransferase 9                                     |
| Aox3                                    | NM_001008527       | 10923432 | 1.46 | 104  | 5.4  | brwn | aldehyde oxidase 3                                                                 |
| Asns                                    | NM_013079          | 10860951 | 0.83 | -28  | 0    | grey | asparagine synthetase                                                              |
| Atad3a                                  | NM_001034922       | 10882201 | 0.78 | -11  | 2.0  | brwn | ATPase family, AAA domain containing 3A                                            |
| Atp5sl                                  | NM_001009705       | 10705192 | 1.22 | 33   | 3.5  | blue | ATP5S-like                                                                         |
| Atpif1                                  | NM_012915          | 10872692 | 1.25 | 318  | 0    | grey | ATPase inhibitory factor 1                                                         |
| BlvrB                                   | NM_001106236       | 10705358 | 1.45 | 19   | 0    | grey | biliverdin reductase B (flavin reductase (NADPH))                                  |
| Clcn5                                   | NM_017106          | 10932584 | 0.80 | -22  | 0    | grey | chloride channel 5                                                                 |
| Cygb                                    | NM_130744          | 10749325 | 1.42 | 42   | 7.2  | brwn | cytoglobin                                                                         |
| Edem3                                   | NM_001191671       | 10764678 | 0.82 | -77  | 7.0  | brwn | ER degradation enhancer, mannosidase alpha-like 3                                  |
| Extl2                                   | NM_001100704       | 10818590 | 1.30 | 18   | 2.8  | brwn | exostosins (multiple)-like 2                                                       |
| Farsb                                   | NM_001004252       | 10929243 | 0.81 | -78  | 1.2  | brwn | phenylalanyl-tRNA synthetase, beta subunit                                         |
| Gcdh                                    | NM_001108896       | 10806628 | 0.71 | -214 | 0    | grey | glutaryl-Coenzyme A dehydrogenase                                                  |
| Gcn1l1                                  | NM_001168664       | 10762600 | 0.79 | -53  | 42.5 | turq | GCN1 general control of amino-acid synthesis 1-like 1 (yeast)                      |
| Gls2                                    | NM_138904          | 10893008 | 0.79 | -19  | 0    | grey | glutaminase 2 (liver, mitochondrial)                                               |
| Gstm1                                   | NM_017014          | 10825925 | 1.46 | 538  | 6.7  | turq | glutathione S-transferase mu 1                                                     |
| Herc2                                   | NM_001107520       | 10707455 | 0.80 | -42  | 24.2 | turq | hect domain and RLD 2                                                              |
| Kcnj16                                  | NM_053314          | 10739351 | 1.87 | 21   | 0    | grey | potassium inwardly-rectifying channel, subfamily J, member 16                      |
| Lipe                                    | NM_012859          | 10719829 | 1.57 | 64   | 8.4  | brwn | lipase, hormone sensitive                                                          |
| Lyz2                                    | NM_012771          | 10902547 | 1.53 | 222  | 0    | grey | lysozyme 2                                                                         |
| Nars                                    | NM_001025635       | 10804889 | 0.79 | -93  | 9.3  | brwn | asparaginyl-tRNA synthetase                                                        |
| P4ha2                                   | NM_001108275       | 10733564 | 0.70 | -37  | 2.5  | turq | prolyl 4-hydroxylase, alpha polypeptide II                                         |
| Pdia4                                   | NM_053849          | 10862361 | 0.82 | -143 | 4.4  | brwn | protein disulfide isomerase family A, member 4                                     |
| Phgdh                                   | NM_031620          | 10825328 | 0.79 | -20  | 0    | grey | phosphoglycerate dehydrogenase                                                     |
| Plscr3                                  | NM_001012139       | 10735027 | 1.24 | 17   | 0    | grey | phospholipid scramblase 3                                                          |
| Rfk                                     | NM_001014106       | 10714249 | 1.34 | 198  | 0    | grey | riboflavin kinase (chr1)                                                           |
| Rfk                                     | NM_001014106       | 10847718 | 1.34 | 209  | 0    | grey | riboflavin kinase (chr3)                                                           |
| Scn1a                                   | NM_030875          | 10845859 | 0.22 | -34  | 3.6  | brwn | sodium channel, voltage-gated, type I, alpha                                       |
| Sec23b                                  | NM_001108593       | 10840396 | 0.82 | -71  | 5.5  | brwn | Sec23 homolog B (S. cerevisiae)                                                    |
| Sepw1                                   | NM_013027          | 10719212 | 1.26 | 17   | 0    | grey | selenoprotein W, 1                                                                 |
| Slc15a3                                 | NM_139341          | 10713974 | 1.29 | 17   | 4.6  | ylw  | solute carrier family 15, member 3                                                 |
| Slc1a4                                  | NM_198763          | 10778620 | 0.82 | -15  | 0    | grey | solute carrier family 1 (glutamate/neutral amino acid transporter), member 4       |
| Slc25a19                                | NM_001007674       | 10748999 | 1.37 | 17   | 3.3  | brwn | solute carrier family 25 (mitochondrial thiamine pyrophosphate carrier), member 19 |
| Slc26a2                                 | NM_057127          | 10804672 | 1.28 | 35   | 8.3  | brwn | solute carrier family 26 (sulfate transporter), member 2                           |
| Slc38a4                                 | NM_130748          | 10906626 | 1.41 | 15   | 1.9  | brwn | solute carrier family 38, member 4                                                 |
| Slc43a1                                 | NM_001107742       | 10837351 | 1.75 | 25   | 5.3  | brwn | solute carrier family 43, member 1                                                 |
| Slc6a6                                  | NM_017206          | 10857314 | 1.45 | 128  | 10.1 | brwn | solute carrier family 6 (neurotransmitter transporter, taurine), member 6          |
| Slc9a3r1                                | NM_021594          | 10739490 | 1.36 | 131  | 5.0  | turq | solute carrier family 9 (sodium/hydrogen exchanger), member 3 regulator 1          |
| Stard4                                  | NM_001106159       | 10803681 | 0.72 | -22  | 4.4  | brwn | STAR-related lipid transfer (START) domain containing 4                            |
| <b>PROTEOLYSIS</b>                      |                    |          |      |      |      |      |                                                                                    |
| LOC363188                               | NM_001178071       | 10921462 | 0.81 | -67  | 21.8 | turq | similar to ubiquitin protein ligase E3 component n-recognin 2                      |
| Rnf166                                  | NM_001002279       | 10811589 | 1.21 | 25   | 2.8  | brwn | ring finger protein 166                                                            |
| Uba5                                    | NM_001009669       | 10919699 | 0.81 | -113 | 19.0 | turq | ubiquitin-like modifier activating enzyme 5                                        |
| Ubc                                     | NM_017314          | 10758134 | 0.73 | -276 | 21.2 | turq | ubiquitin C                                                                        |
| <b>RECEPTORS &amp; BINDING PROTEINS</b> |                    |          |      |      |      |      |                                                                                    |
| Igfbp3                                  | NM_012588          | 10778390 | 1.71 | 84   | 10.1 | brwn | insulin-like growth factor binding protein 3                                       |
| Ldlr                                    | NM_175762          | 10908521 | 0.62 | -89  | 14.0 | turq | low density lipoprotein receptor                                                   |
| Ms4a11                                  | ENSRNOT00000033795 | 10714020 | 1.40 | 24   | 14.9 | turq | membrane-spanning 4-domains, subfamily A, member 11                                |
| Ms4a6b                                  | NM_001006975       | 10728924 | 1.48 | 19   | 17.6 | turq | membrane-spanning 4-domains, subfamily A, member 6B                                |
| Olr1448                                 | NM_001000019       | 10733888 | 0.77 | -37  | 0    | grey | olfactory receptor 1448                                                            |
| Sorl1                                   | NM_053519          | 10916493 | 0.78 | -34  | 22.2 | turq | sortilin-related receptor, LDLR class A repeats-containing                         |
| Tax1bp1                                 | NM_001004199       | 10855576 | 0.83 | -156 | 13.6 | brwn | Tax1 (human T-cell leukemia virus type I) binding protein 1                        |
| <b>SIGNALING</b>                        |                    |          |      |      |      |      |                                                                                    |
| Akap13                                  | NM_001106271       | 10707953 | 0.80 | -61  | 0    | grey | A kinase (PRKA) anchor protein 13                                                  |
| Alox5ap                                 | NM_017260          | 10759999 | 1.42 | 21   | 0    | grey | arachidonate 5-lipoxygenase activating protein                                     |
| Dusp18                                  | NM_001013128       | 10773754 | 1.28 | 21   | 3.3  | brwn | dual specificity phosphatase 18                                                    |
| Ficd                                    | NM_001010946       | 10762893 | 0.75 | -18  | 16.4 | brwn | FIC domain containing                                                              |
| Hspa5                                   | NM_013083          | 10835692 | 0.78 | -847 | 20.3 | turq | heat shock protein 5                                                               |

|                                               |                     |                 |             |            |             |             |                                                                              |
|-----------------------------------------------|---------------------|-----------------|-------------|------------|-------------|-------------|------------------------------------------------------------------------------|
| Hyou1                                         | NM_138867           | 10909482        | 0.76        | -169       | 35.3        | turq        | hypoxia up-regulated 1                                                       |
| Isg15                                         | NM_001106700        | 10882317        | 1.50        | 16         | 2.6         | turq        | ISG15 ubiquitin-like modifier                                                |
| Pde3b                                         | NM_017229           | 10710089        | 1.23        | 70         | 0           | grey        | phosphodiesterase 3B, cGMP-inhibited                                         |
| Pdk2                                          | NM_030872           | 10746469        | 1.29        | 170        | 13.4        | brwn        | pyruvate dehydrogenase kinase, isozyme 2                                     |
| Rab34                                         | NM_001012140        | 10745202        | 1.42        | 62         | 0           | grey        | RAB34, member RAS oncogene family                                            |
| Rhob                                          | NM_022542           | 10889177        | 1.23        | 40         | 0           | grey        | ras homolog gene family, member B                                            |
| Rhog                                          | NM_001037195        | 10724208        | 1.27        | 62         | 6.4         | turq        | ras homolog gene family, member G (rho G)                                    |
| Rhpn2                                         | NM_001107505        | 10706146        | 0.68        | -23        | 10.8        | brwn        | rhopilin, Rho GTPase binding protein 2                                       |
| Spry2                                         | NM_001012046        | 10785773        | 1.28        | 15         | 1.7         | brwn        | sprouty homolog 2 (Drosophila)                                               |
| Srp54a                                        | NM_053871           | 10884623        | 0.80        | -278       | 10.8        | brwn        | signal recognition particle 54a                                              |
| Tbccd1                                        | NM_001012016        | 10751993        | 0.78        | -56        | 0           | grey        | TBCC domain containing 1                                                     |
| <b>TRANSCRIPTION</b>                          |                     |                 |             |            |             |             |                                                                              |
| Atf3                                          | NM_012912           | 10770710        | 1.42        | 11         | 3.7         | blue        | activating transcription factor 3                                            |
| Bcas3                                         | NM_001173430        | 10737075        | 1.23        | 31         | 1.7         | ylw         | breast carcinoma amplified sequence 3                                        |
| Bcl7b                                         | NM_001109021        | 10761220        | 1.23        | 44         | 3.5         | turq        | B-cell CLL/lymphoma 7B                                                       |
| Bhlhe40                                       | NM_053328           | 10857610        | 1.44        | 112        | 2.8         | brwn        | basic helix-loop-helix family, member e40                                    |
| Bhlhe41                                       | AF009329            | 10867026        | 1.94        | 49         | 2.2         | brwn        | basic helix-loop-helix family, member e41                                    |
| Casc4                                         | ENSRNOT00000044158  | 10839197        | 1.35        | 26         | 3.3         | turq        | cancer susceptibility candidate 4                                            |
| Dnajb11                                       | NM_001015021        | 10755171        | 0.81        | -156       | 20.3        | turq        | DnaJ (Hsp40) homolog, subfamily B, member 11                                 |
| Gtf2a1                                        | NM_022208           | 10891436        | 0.82        | -63        | 0           | grey        | general transcription factor IIA, 1                                          |
| Ikzf5                                         | NM_001107555        | 10726251        | 1.24        | 79         | 0           | grey        | IKAROS family zinc finger 5                                                  |
| Ino80e                                        | NM_001013900        | 10725846        | 1.35        | 48         | 0           | grey        | INO80 complex subunit E                                                      |
| LOC680290                                     | XM_002728448        | 10796912        | 1.61        | 34         | 0           | grey        | similar to Zinc finger protein 208                                           |
| Maf                                           | NM_019318           | 10811278        | 1.29        | 35         | 9.4         | brwn        | v-maf musculoaponeurotic fibrosarcoma oncogene homolog (avian)               |
| <b>Mdm4</b>                                   | <b>NM_001012026</b> | <b>10767663</b> | <b>0.81</b> | <b>-78</b> | <b>25.1</b> | <b>blue</b> | <b>Mdm4 p53 binding protein homolog (mouse)</b>                              |
| Nfrkb                                         | NM_001108133        | 10908833        | 0.79        | -29        | 0           | grey        | nuclear factor related to kappa B binding protein                            |
| Nfxl1                                         | NM_001170438        | 10772472        | 0.80        | -27        | 11.2        | blue        | nuclear transcription factor, X-box binding-like 1                           |
| Nr1d1                                         | NM_001113422        | 10746955        | 1.75        | 109        | 13.6        | brwn        | nuclear receptor subfamily 1, group D, member 1                              |
| Pir                                           | NM_001009474        | 10937734        | 1.42        | 43         | 5.4         | turq        | pirin (iron-binding nuclear protein)                                         |
| Poli                                          | NM_001106137        | 10805111        | 1.28        | 19         | 11.0        | brwn        | polymerase (DNA directed), iota                                              |
| Rela                                          | NM_199267           | 10713089        | 1.28        | 50         | 6.7         | turq        | v-rel reticuloendotheliosis viral oncogene homolog A (avian)                 |
| Sdf2l1                                        | NM_001109433        | 10752531        | 0.69        | -151       | 19.2        | brwn        | stromal cell-derived factor 2-like 1                                         |
| Spdef                                         | NM_001109530        | 10831880        | 0.63        | -22        | 12.3        | brwn        | SAM pointed domain containing ets transcription factor                       |
| Tef                                           | NM_019194           | 10897997        | 1.40        | 52         | 0           | grey        | thyrotrophic embryonic factor                                                |
| Tob2                                          | NM_001007146        | 10905645        | 1.26        | 21         | 0.6         | mgnt        | transducer of ERBB2, 2                                                       |
| Tsc22d3                                       | NM_031345           | 10939516        | 1.31        | 48         | 0           | grey        | TSC22 domain family, member 3                                                |
| Zbtb34                                        | ENSRNOT00000051893  | 10844502        | 0.77        | -17        | 0           | grey        | zinc finger and BTB domain containing 34                                     |
| Zfp36                                         | NM_133290           | 10720215        | 1.29        | 35         | 10.7        | turq        | zinc finger protein 36                                                       |
| Zgpat                                         | NM_001009656        | 10843013        | 0.82        | -13        | 0           | grey        | zinc finger, CCCH-type with G patch domain                                   |
| <b>TRANSLATION &amp; PROTEIN MODIFICATION</b> |                     |                 |             |            |             |             |                                                                              |
| Arfgap1                                       | NM_145090           | 10842903        | 0.74        | -14        | 10.4        | brwn        | ADP-ribosylation factor GTPase activating protein 1                          |
| Cars                                          | NM_001106319        | 10727084        | 0.80        | -49        | 14.0        | brwn        | cysteinyl-tRNA synthetase                                                    |
| Clp1                                          | NM_001009599        | 10846846        | 1.23        | 46         | 4.1         | turq        | CLP1, cleavage and polyadenylation factor I subunit, homolog (S. cerevisiae) |
| Ddx51                                         | NM_001107150        | 10762985        | 0.64        | -15        | 8.6         | turq        | DEAD (Asp-Glu-Ala-Asp) box polypeptide 51                                    |
| Dhx36                                         | NM_001107678        | 10823386        | 0.81        | -86        | 2.0         | brwn        | DEAH (Asp-Glu-Ala-His) box polypeptide 36                                    |
| Eif1                                          | NM_001105837        | 10738170        | 0.82        | -20        | 2.0         | brwn        | eukaryotic translation initiation factor 1                                   |
| Eif2b2                                        | NM_032058           | 10886014        | 0.82        | -37        | 2.2         | brwn        | eukaryotic translation initiation factor 2B, subunit 2 beta                  |
| Eif3c                                         | NM_001100662        | 10725724        | 0.82        | -139       | 8.6         | brwn        | eukaryotic translation initiation factor 3, subunit C                        |
| Gle1                                          | NM_001025731        | 10835037        | 0.78        | -14        | 0.3         | ylw         | GLE1 RNA export mediator homolog (yeast)                                     |
| Hars                                          | NM_001025414        | 10804003        | 0.80        | -61        | 11.9        | brwn        | histidyl-tRNA synthetase                                                     |
| Lars                                          | NM_001009637        | 10804187        | 0.77        | -115       | 8.1         | brwn        | leucyl-tRNA synthetase                                                       |
| Mrpl42                                        | NM_001106782        | 10901999        | 1.32        | 253        | 0           | grey        | mitochondrial ribosomal protein L42                                          |
| Prpf4b                                        | NM_001011923        | 10798074        | 0.78        | -62        | 1.2         | pink        | PRP4 pre-mRNA processing factor 4 homolog B (yeast)                          |
| Qtrtd1                                        | ENSRNOT00000000317  | 10751196        | 0.77        | -12        | 0           | grey        | queuine tRNA-ribosyltransferase domain containing 1                          |
| RGD1563835                                    | ENSRNOT00000042756  | 10751237        | 0.71        | -59        | 4.4         | brwn        | similar to ribosomal protein L27                                             |
| Rnaset2                                       | NM_001106210        | 10703139        | 0.75        | -145       | 8.3         | brwn        | ribonuclease T2                                                              |
| Sars                                          | NM_001007606        | 10826039        | 0.80        | -126       | 14.6        | brwn        | seryl-tRNA synthetase                                                        |
| Sfrs5                                         | NM_001195505        | 10885672        | 0.75        | -282       | 1.2         | pink        | splicing factor, arginine/serine-rich 5                                      |
| Yars                                          | NM_001025696        | 10872291        | 0.80        | -70        | 21.3        | turq        | tyrosyl-tRNA synthetase                                                      |
| <b>MISCELLANEOUS &amp; UNKNOWN</b>            |                     |                 |             |            |             |             |                                                                              |
| Cuedc2                                        | NM_001079886        | 10730559        | 1.28        | 15         | 3.4         | brwn        | CUE domain containing 2                                                      |
| Fam110c                                       | NM_001025051        | 10884075        | 1.39        | 12         | 0           | grey        | family with sequence similarity 110, member C                                |
| Fam115c                                       | ENSRNOT00000050392  | 10862301        | 0.78        | -12        | 0           | grey        | family with sequence similarity 115, member C                                |
| Gramd1a                                       | NM_001014160        | 10720918        | 0.80        | -26        | 10.8        | turq        | GRAM domain containing 1A                                                    |
| LOC100360342                                  | ENSRNOT00000021923  | 10882829        | 0.81        | -23        | 6.5         | brwn        | rCG61559-like                                                                |
| LOC100361593                                  | XM_002729223        | 10840365        | 0.83        | -39        | 0           | grey        | hypothetical protein LOC100361593                                            |
| LOC500420                                     | BC089864            | 10875751        | 1.47        | 52         | 7.4         | turq        | similar to CG12279-PA                                                        |
| LOC680761                                     | ENSRNOT00000043552  | 10708832        | 0.83        | -38        | 0.8         | brwn        | hypothetical protein LOC680761                                               |
| Mir671                                        | NR_032287           | 10859988        | 0.68        | -37        | 12.8        | brwn        | microRNA mir-671                                                             |

|                           |                    |                 |             |           |             |             |                                                                         |
|---------------------------|--------------------|-----------------|-------------|-----------|-------------|-------------|-------------------------------------------------------------------------|
| RGD1303127                | NM_001004244       | 10906863        | 1.26        | 81        | 1.0         | turq        | similar to hypothetical protein FLJ20436                                |
| RGD1308059                | BC091300           | 10869656        | 0.72        | -17       | 6.8         | brwn        | similar to DNA segment, Chr 4, Brigham & Womens Genetics 0951 expressed |
| RGD1309621                | ENSRNOT00000055437 | 10859774        | 1.24        | 58        | 5.6         | turq        | similar to hypothetical protein FLJ10652                                |
| RGD1309995                | ENSRNOT00000011326 | 10901367        | 0.82        | -142      | 6.4         | brwn        | similar to CG13957-PA                                                   |
| RGD1559575                | ENSRNOT00000046438 | 10742352        | 1.60        | 12        | 12.4        | turq        | similar to novel protein                                                |
| RGD1560812                | ENSRNOT00000065561 | 10884158        | 1.43        | 15        | 8.7         | brwn        | RGD1560812                                                              |
| RGD1564171                | NM_001109186       | 10816879        | 0.74        | -18       | 0           | grey        | RGD1564171                                                              |
| Tmem56                    | NM_001135879       | 10826442        | 0.77        | -69       | 1.6         | brwn        | transmembrane protein 56                                                |
| Trim39                    | NM_213562          | 10827741        | 0.76        | -11       | 0           | grey        | tripartite motif-containing 39                                          |
| Wdr33                     | NM_001107398       | 10800672        | 0.83        | -26       | 3.8         | turq        | WD repeat domain 33                                                     |
| <b>EST's</b>              |                    |                 |             |           |             |             |                                                                         |
| RGD1305469                | ENSRNOT00000039277 | 10773638        | 0.83        | -26       | 4.7         | brwn        | similar to RIKEN cDNA 9030221M09 gene                                   |
| RGD1308114                | BC079348           | 10795444        | 1.63        | 41        | 6.1         | brwn        | similar to cDNA sequence AF397014                                       |
| RGD1309308                | NM_001126279       | 10875795        | 0.78        | -166      | 8.4         | brwn        | similar to RIKEN cDNA 1810074P20                                        |
| RGD1560108                | NM_001109161       | 10713518        | 1.33        | 14        | 10.3        | brwn        | similar to RIKEN cDNA 2700081O15                                        |
| Mir186                    | NR_031904          | 10819903        | 0.82        | -11       | 2.1         | blue        | microRNA mir-186                                                        |
| NC_001665                 |                    | 10930593        | 0.58        | -1377     | 8.3         | blue        |                                                                         |
| GENSCAN00000034333        |                    | 10781960        | 0.57        | -30       | 0           | grey        |                                                                         |
| GENSCAN00000030433        |                    | 10932610        | 0.77        | -54       | 6.9         | turq        |                                                                         |
| GENSCAN00000025175        |                    | 10743100        | 0.81        | -12       | 0           | grey        |                                                                         |
| FQ227520                  |                    | 10851813        | 0.81        | -35       | 10.5        | turq        |                                                                         |
| FQ222426                  |                    | 10842433        | 1.27        | 16        | 0           | grey        |                                                                         |
| <b>FQ217081</b>           |                    | <b>10814142</b> | <b>1.24</b> | <b>53</b> | <b>38.6</b> | <b>turq</b> |                                                                         |
| FQ212372                  |                    | 10891830        | 1.43        | 64        | 8.1         | ylw         |                                                                         |
| ENSRNOT00000068215        |                    | 10771201        | 1.37        | 11        | 0           | grey        |                                                                         |
| ENSRNOT00000063495        |                    | 10892977        | 0.68        | -18       | 0.7         | pink        |                                                                         |
| ENSRNOT00000061085        |                    | 10779510        | 1.45        | 14        | 9.9         | brwn        |                                                                         |
| ENSRNOT00000059335        |                    | 10884765        | 2.30        | 58        | 0           | grey        |                                                                         |
| ENSRNOT00000057455        |                    | 10934659        | 0.77        | -11       | 0           | grey        |                                                                         |
| ENSRNOT00000053987        |                    | 10755127        | 0.71        | -38       | 0           | grey        |                                                                         |
| ENSRNOT00000053274        |                    | 10754642        | 0.80        | -12       | 10.5        | blue        |                                                                         |
| ENSRNOT00000052462        |                    | 10802708        | 0.67        | -15       | 1.0         | brwn        |                                                                         |
| <b>ENSRNOT00000046636</b> |                    | <b>10779529</b> | <b>1.41</b> | <b>10</b> | <b>43.4</b> | <b>blue</b> |                                                                         |
| ENSRNOT00000046555        |                    | 10892346        | 0.77        | -17       | 3.8         | blue        |                                                                         |
| ENSRNOT00000035259        |                    | 10832838        | 1.22        | 80        | 2.0         | ylw         |                                                                         |
| ENSRNOT00000032056        |                    | 10770924        | 0.79        | -16       | 0           | grey        |                                                                         |
| ENSRNOT00000029093        |                    | 10884738        | 0.79        | -33       | 8.0         | brwn        |                                                                         |
| ENSRNOT00000025383        |                    | 10920986        | 0.67        | -13       | 3.9         | blue        |                                                                         |
| ENSRNOT00000021212        |                    | 10836015        | 0.78        | -159      | 9.8         | brwn        |                                                                         |
| ENSRNOT00000015111        |                    | 10766302        | 1.23        | 14        | 20.8        | blue        |                                                                         |
| ENSRNOT00000011530        |                    | 10891878        | 0.75        | -16       | 2.2         | ylw         |                                                                         |
| ENSRNOT00000010282        |                    | 10812881        | 0.74        | -46       | 3.0         | ylw         |                                                                         |
| BC158824                  |                    | 10861130        | 1.37        | 183       | 0           | grey        |                                                                         |
| BC105775                  |                    | 10878999        | 1.23        | 14        | 4.1         | blue        |                                                                         |
| ---                       |                    | 10708589        | 0.68        | -111      | 4.7         | blue        |                                                                         |
| ---                       |                    | 10761285        | 1.21        | 10        | 0           | grey        |                                                                         |
| ---                       |                    | 10793066        | 1.28        | 13        | 0           | grey        |                                                                         |
| ---                       |                    | 10700831        | 0.55        | -65       | 15.2        | blue        |                                                                         |
| ---                       |                    | 10701502        | 0.64        | -35       | 11.2        | blue        |                                                                         |
| ---                       |                    | 10701273        | 0.53        | -19       | 6.1         | blue        |                                                                         |
| ---                       |                    | 10701243        | 0.66        | -33       | 5.8         | blue        |                                                                         |
| ---                       |                    | 10700448        | 1.23        | 65        | 5.7         | blue        |                                                                         |
| ---                       |                    | 10700735        | 0.73        | -43       | 5.7         | blue        |                                                                         |
| ---                       |                    | 10700433        | 0.58        | -25       | 2.7         | blue        |                                                                         |
| ---                       |                    | 10700469        | 0.71        | -543      | 1.5         | blue        |                                                                         |
| ---                       |                    | 10700216        | 2.13        | 22        | 1.2         | blue        |                                                                         |
| ---                       |                    | 10700904        | 0.80        | -375      | 8.9         | brwn        |                                                                         |
| ---                       |                    | 10700786        | 0.76        | -230      | 8.5         | brwn        |                                                                         |
| ---                       |                    | 10701084        | 0.82        | -280      | 7.9         | brwn        |                                                                         |
| ---                       |                    | 10700113        | 0.69        | -292      | 6.6         | brwn        |                                                                         |
| ---                       |                    | 10700653        | 0.40        | -28       | 1.4         | brwn        |                                                                         |
| ---                       |                    | 10700937        | 0.80        | -351      | 0           | grey        |                                                                         |
| ---                       |                    | 10700857        | 0.70        | -74       | 0           | grey        |                                                                         |
| ---                       |                    | 10701035        | 0.78        | -46       | 0           | grey        |                                                                         |
| ---                       |                    | 10700471        | 0.66        | -40       | 0           | grey        |                                                                         |
| ---                       |                    | 10700196        | 0.70        | -30       | 0           | grey        |                                                                         |
| ---                       |                    | 10701458        | 0.59        | -28       | 0           | grey        |                                                                         |
| ---                       |                    | 10701002        | 0.52        | -25       | 0           | grey        |                                                                         |
| ---                       |                    | 10700221        | 0.61        | -24       | 0           | grey        |                                                                         |



|     |                 |             |             |             |             |  |
|-----|-----------------|-------------|-------------|-------------|-------------|--|
| --- | 10701395        | 0.51        | -23         | 0           | grey        |  |
| --- | 10701210        | 0.50        | -18         | 0           | grey        |  |
| --- | 10701580        | 0.57        | -17         | 0           | grey        |  |
| --- | 10701565        | 0.70        | -17         | 0           | grey        |  |
| --- | 10700712        | 0.68        | -15         | 0           | grey        |  |
| --- | 10700088        | 0.70        | -14         | 0           | grey        |  |
| --- | 10701001        | 0.74        | -14         | 0           | grey        |  |
| --- | 10701249        | 0.51        | -13         | 0           | grey        |  |
| --- | 10700962        | 0.39        | -12         | 0           | grey        |  |
| --- | 10700246        | 0.46        | -11         | 0           | grey        |  |
| --- | 10701388        | 1.69        | 10          | 0           | grey        |  |
| --- | 10700638        | 1.49        | 16          | 0           | grey        |  |
| --- | 10700128        | 2.07        | 16          | 0           | grey        |  |
| --- | 10701130        | 1.41        | 17          | 0           | grey        |  |
| --- | 10701259        | 1.46        | 35          | 0           | grey        |  |
| --- | 10700922        | 1.22        | 60          | 0           | grey        |  |
| --- | 10701618        | 1.34        | 100         | 0           | grey        |  |
| --- | 10701477        | 0.61        | -19         | 0.8         | pink        |  |
| --- | 10700731        | 0.59        | -17         | 0.7         | pink        |  |
| --- | 10701009        | 0.74        | -50         | 0.4         | pink        |  |
| --- | <b>10700160</b> | <b>0.76</b> | <b>-690</b> | <b>42.0</b> | <b>turq</b> |  |
| --- | 10700258        | 0.77        | -651        | 34.0        | turq        |  |
| --- | 10700880        | 0.79        | -463        | 32.1        | turq        |  |
| --- | 10700799        | 0.81        | -11         | 28.3        | turq        |  |
| --- | 10700959        | 0.83        | -399        | 23.8        | turq        |  |
| --- | 10700736        | 0.79        | -391        | 22.4        | turq        |  |
| --- | 10701198        | 0.78        | -500        | 19.1        | turq        |  |
| --- | 10700938        | 0.82        | -269        | 18.4        | turq        |  |
| --- | 10700299        | 0.79        | -526        | 17.6        | turq        |  |
| --- | 10700270        | 0.82        | -260        | 16.6        | turq        |  |
| --- | 10700151        | 0.72        | -23         | 8.0         | turq        |  |
| --- | 10701154        | 0.70        | -32         | 2.7         | turq        |  |
| --- | 10700475        | 0.68        | -11         | 1.0         | ylw         |  |

#### K. Testis

| Gene Symbol             | RefSeq/GenBank/<br>Ensemble Number | Affymetrix<br>Probeset ID | V/C  | Mean<br>Diff. | k.in | Mod   | Gene Title                                                                   |
|-------------------------|------------------------------------|---------------------------|------|---------------|------|-------|------------------------------------------------------------------------------|
| <b>APOPTOSIS</b>        |                                    |                           |      |               |      |       |                                                                              |
| Eaf1                    | NM_001107293                       | 10786703                  | 1.25 | 20            | 1.7  | turq  | ELL associated factor 1                                                      |
| Pdcd11                  | NM_001107604                       | 10715916                  | 1.24 | 26            | 0    | grey  | programmed cell death 11                                                     |
| Tfg                     | NM_001012144                       | 10750781                  | 1.21 | 140           | 24.8 | turq  | Trk-fused gene                                                               |
| Wdfy3                   | NM_001170551                       | 10771287                  | 1.25 | 32            | 5.7  | ylw   | WD repeat and FYVE domain containing 3                                       |
| <b>CELL CYCLE</b>       |                                    |                           |      |               |      |       |                                                                              |
| Cndbp1                  | NM_001013204                       | 10839090                  | 0.76 | -56           | 22.9 | ylw   | cyclin D-type binding-protein 1                                              |
| Nubp1                   | NM_001009619                       | 10740466                  | 0.77 | -63           | 11.6 | blue  | nucleotide binding protein 1                                                 |
| Terc                    | NR_001567                          | 10814703                  | 0.56 | -24           | 29.7 | ylw   | telomerase RNA component                                                     |
| <b>CYTOSKELETON-ECM</b> |                                    |                           |      |               |      |       |                                                                              |
| Cdon                    | NM_017358                          | 10908968                  | 1.23 | 16            | 18.4 | brwn  | Cdon homolog (mouse)                                                         |
| Eml5                    | ENSRNOT00000057601                 | 10891559                  | 1.42 | 22            | 6.5  | brwn  | echinoderm microtubule associated protein like 5                             |
| Lman1                   | NM_053886                          | 10802347                  | 1.23 | 146           | 17.3 | turq  | lectin, mannose-binding, 1                                                   |
| Lmnb1                   | NM_053905                          | 10801821                  | 1.21 | 13            | 0    | grey  | lamin B1                                                                     |
| Map4                    | NM_001024278                       | 10913570                  | 1.37 | 127           | 19.1 | brwn  | microtubule-associated protein 4                                             |
| Parva                   | NM_020656                          | 10709993                  | 1.29 | 62            | 4.6  | ylw   | parvin, alpha                                                                |
| Pxn                     | NM_001012147                       | 10762665                  | 1.24 | 48            | 11.3 | turq  | paxillin                                                                     |
| Tppp2                   | NM_001109100                       | 10779868                  | 0.59 | -17           | 2.23 | green | tubulin polymerization-promoting protein family member 2                     |
| <b>DEVELOPMENT</b>      |                                    |                           |      |               |      |       |                                                                              |
| Asap1                   | NM_001044245                       | 10904031                  | 1.25 | 37            | 13.5 | brwn  | ArfGAP with SH3 domain, ankyrin repeat and PH domain 1                       |
| Ccrn4l                  | NM_138526                          | 10815281                  | 1.36 | 11            | 0    | grey  | CCR4 carbon catabolite repression 4-like ( <i>S. cerevisiae</i> )            |
| Cdan1                   | NM_001107765                       | 10848860                  | 1.20 | 13            | 0    | grey  | congenital dyserythropoietic anemia, type I                                  |
| Cirh1a                  | NM_001009640                       | 10807583                  | 1.26 | 77            | 2.7  | ylw   | cirrhosis, autosomal recessive 1A                                            |
| Dctpp1                  | NM_138892                          | 10725989                  | 0.73 | -11           | 0    | grey  | dCTP pyrophosphatase 1 (chr1)                                                |
| Dctpp1                  | NM_138892                          | 10789732                  | 0.80 | -11           | 0.8  | ylw   | dCTP pyrophosphatase 1 (chr16)                                               |
| Eed                     | ENSRNOT00000033400                 | 10723623                  | 0.78 | -24           | 11.7 | blue  | embryonic ectoderm development                                               |
| Fis1                    | NM_001105919                       | 10757448                  | 0.79 | -114          | 0    | grey  | fission 1 (mitochondrial outer membrane) homolog ( <i>S. cerevisiae</i> )    |
| Htt                     | NM_024357                          | 10777571                  | 1.20 | 21            | 11.3 | turq  | huntingtin                                                                   |
| Mmachc                  | NM_001107962                       | 10878905                  | 1.24 | 80            | 30.9 | turq  | methylmalonic aciduria (cobalamin deficiency) cblC type, with homocystinuria |
| Nenf                    | NM_001002851                       | 10770714                  | 0.77 | -15           | 17.4 | ylw   | neuron derived neurotrophic factor                                           |
| Npcd1                   | NM_001004231                       | 10834225                  | 1.25 | 23            | 11.5 | brwn  | neural proliferation, differentiation and control, 1                         |

|                                   |                           |                 |             |             |             |             |                                                                                                   |
|-----------------------------------|---------------------------|-----------------|-------------|-------------|-------------|-------------|---------------------------------------------------------------------------------------------------|
| Pcnx13                            | ENSRNOT0000064136         | 10727943        | 1.40        | 31          | 30.3        | turq        | pecanex-like 3 (Drosophila)                                                                       |
| Shfm1                             | NM_001126090              | 10860939        | 0.78        | -176        | 33.5        | ylw         | split hand/foot malformation (ectrodactyly) type 1                                                |
| Slit3                             | NM_031321                 | 10732750        | 1.27        | 12          | 12.4        | brwn        | slit homolog 3 (Drosophila)                                                                       |
| <b>Tcta</b>                       | <b>NM_001014005</b>       | <b>10793218</b> | <b>0.83</b> | <b>-29</b>  | <b>27.8</b> | <b>brwn</b> | <b>T-cell leukemia translocation altered gene</b>                                                 |
| Tesk1                             | NM_031578                 | 10868494        | 1.22        | 34          | 3.5         | ylw         | testis-specific kinase 1                                                                          |
| Urb2                              | NM_001135708              | 10808764        | 1.25        | 18          | 1.1         | ylw         | URB2 ribosome biogenesis 2 homolog ( <i>S. cerevisiae</i> )                                       |
| Vamp1                             | NM_013090                 | 10858858        | 1.32        | 16          | 0.15        | green       | vesicle-associated membrane protein 1                                                             |
| Vamp8                             | NM_031827                 | 10863218        | 0.74        | -96         | 7.6         | ylw         | vesicle-associated membrane protein 8                                                             |
| Wdtdc1                            | NM_001107908              | 10872585        | 1.20        | 57          | 4.5         | ylw         | WD and tetratricopeptide repeats 1                                                                |
| <b>ELECTRON TRANSPORT</b>         |                           |                 |             |             |             |             |                                                                                                   |
| Cox7a2                            | NM_022503                 | 10772901        | 0.79        | -629        | 39.6        | ylw         | cytochrome c oxidase subunit VIIa polypeptide 2 (chr14)                                           |
| Cox7a2                            | NM_022503                 | 10918940        | 0.80        | -643        | 41.3        | ylw         | cytochrome c oxidase subunit VIIa polypeptide 2 (chr8)                                            |
| Fdx1                              | NM_017126                 | 10917346        | 0.82        | -35         | 11.8        | ylw         | ferredoxin 1                                                                                      |
| Gpx1                              | NM_030826                 | 10793103        | 0.78        | -442        | 15.4        | blue        | glutathione peroxidase 1                                                                          |
| LOC685322                         | NM_001170465              | 10778108        | 0.82        | -111        | 38.9        | ylw         | similar to ubiquinol-cytochrome c reductase complex 7.2kDa protein isoform b                      |
| <b>Prdx2</b>                      | <b>NM_017169</b>          | <b>10810018</b> | <b>0.80</b> | <b>-177</b> | <b>28.4</b> | <b>brwn</b> | <b>peroxiredoxin 2</b>                                                                            |
| Prdx4                             | NM_053512                 | 10933699        | 0.77        | -41         | 7.4         | turq        | peroxiredoxin 4                                                                                   |
| <b>EPIGENETICS</b>                |                           |                 |             |             |             |             |                                                                                                   |
| Chrac1                            | NM_001134880              | 10896957        | 0.76        | -21         | 27.9        | ylw         | chromatin accessibility complex 1                                                                 |
| Dot1l                             | NM_001108733              | 10900419        | 1.38        | 18          | 5.6         | blue        | DOT1-like, histone H3 methyltransferase ( <i>S. cerevisiae</i> )                                  |
| Ep400                             | NM_001107149              | 10759287        | 1.21        | 27          | 11.1        | ylw         | E1A binding protein p400                                                                          |
| H1f0                              | NM_012578                 | 10897543        | 0.81        | -65         | 9.5         | blue        | H1 histone family, member 0                                                                       |
| Jmjd1c                            | NM_001191719              | 10832829        | 1.23        | 60          | 15.6        | brwn        | jumonji domain containing 1C                                                                      |
| LOC100365770                      | XM_002727530              | 10936923        | 0.73        | -15         | 0           | grey        | histone variant H2a12-like                                                                        |
| LOC685909                         | NM_001106019              | 10805582        | 0.83        | -38         | 19.4        | ylw         | similar to H2A histone family, member V isoform 1                                                 |
| Mett11a                           | NM_001025019              | 10835252        | 0.83        | -14         | 8.5         | brwn        | methyltransferase like 11A                                                                        |
| RGD1564767                        | NM_001024282              | 10795196        | 0.77        | -23         | 0           | grey        | Histone H2a                                                                                       |
| Scmh1                             | NM_001109669              | 10871629        | 1.37        | 26          | 6.4         | brwn        | sex comb on midleg homolog 1 (Drosophila)                                                         |
| Smarca5                           | NM_001107419              | 10806937        | 1.24        | 85          | 5.8         | ylw         | SWI/SNF related, matrix associated, actin dependent regulator of chromatin, subfamily a, member 5 |
| <b>GOLGI APPARATUS</b>            |                           |                 |             |             |             |             |                                                                                                   |
| Ergic3                            | NM_001106533              | 10841452        | 0.83        | -140        | 9.1         | turq        | ERGIC and golgi 3                                                                                 |
| Gcnt1                             | NM_022276                 | 10729209        | 0.71        | -18         | 0.2         | black       | glucosaminyl (N-acetyl) transferase 1, core 2 (beta-1,6-N-acetylglucosaminyltransferase)          |
| Mgat4a                            | NM_001160155              | 10927472        | 0.79        | -28         | 0           | grey        | mannosyl (alpha-1,3-)-glycoprotein beta-1,4-N-acetylglucosaminyltransferase, isozyme A            |
| Use1                              | NM_001169100              | 10787256        | 0.72        | -419        | 29.8        | ylw         | unconventional SNARE in the ER 1 homolog ( <i>S. cerevisiae</i> )                                 |
| <b>GROWTH FACTORS</b>             |                           |                 |             |             |             |             |                                                                                                   |
| Ik                                | NM_001005537              | 10801086        | 1.26        | 176         | 33.5        | ylw         | IK cytokine                                                                                       |
| Lass2                             | NM_001033700              | 10817383        | 1.31        | 152         | 28.0        | turq        | LAG1 homolog, ceramide synthase 2                                                                 |
| <b>IMMUNE RESPONSE</b>            |                           |                 |             |             |             |             |                                                                                                   |
| C4bpb                             | NM_016995                 | 10767436        | 1.27        | 14          | 2.9         | blue        | complement component 4 binding protein, beta                                                      |
| Lkap                              | NM_133421                 | 10731291        | 1.30        | 135         | 14.7        | ylw         | limkain b1                                                                                        |
| LOC100361139                      | ENSRNOT00000057140        | 10939402        | 0.66        | -14         | 0           | grey        | thymosin-like 8-like                                                                              |
| LOC100364751                      | XM_002726462              | 10866142        | 0.75        | -24         | 12.3        | turq        | immunoreceptor Ly49si3-like                                                                       |
| Ly49si2                           | NM_001009498              | 10866109        | 0.57        | -41         | 25.0        | turq        | immunoreceptor Ly49si2                                                                            |
| Tsta3                             | NM_001127455              | 10904688        | 0.80        | -110        | 42.5        | ylw         | tissue specific transplantation antigen P35B                                                      |
| <b>METABOLISM &amp; TRANSPORT</b> |                           |                 |             |             |             |             |                                                                                                   |
| Acads                             | NM_022512                 | 10759034        | 0.74        | -47         | 0           | grey        | acyl-Coenzyme A dehydrogenase, C-2 to C-3 short chain                                             |
| Agpat1                            | NM_212458                 | 10831452        | 1.31        | 112         | 27.8        | ylw         | 1-acylglycerol-3-phosphate O-acyltransferase 1 (lysophosphatidic acid acyltransferase, alpha)     |
| Atp11a                            | NM_001107324              | 10792859        | 1.30        | 70          | 2.5         | ylw         | ATPase, class VI, type 11A                                                                        |
| <b>Atp5e</b>                      | <b>BC058133</b>           | <b>10773636</b> | <b>0.66</b> | <b>-416</b> | <b>58.2</b> | <b>ylw</b>  | <b>ATP synthase, H+ transporting, mitochondrial F1 complex, epsilon subunit</b>                   |
| <b>Atp5j2</b>                     | <b>ENSRNOT00000033537</b> | <b>10756546</b> | <b>0.81</b> | <b>-517</b> | <b>49.2</b> | <b>ylw</b>  | <b>ATP synthase, H+ transporting, mitochondrial F0 complex, subunit F2</b>                        |
| <b>Atp5l</b>                      | <b>NM_212516</b>          | <b>10916920</b> | <b>0.69</b> | <b>-62</b>  | <b>43.9</b> | <b>ylw</b>  | <b>ATP synthase, H+ transporting, mitochondrial F0 complex, subunit G</b>                         |
| Atp6v1e1                          | NM_198745                 | 10865212        | 0.82        | -134        | 12.2        | brwn        | ATPase, H+ transporting, lysosomal V1 subunit E1                                                  |
| Bckdha                            | NM_012782                 | 10719863        | 0.79        | -110        | 0           | grey        | branched chain ketoacid dehydrogenase E1, alpha polypeptide                                       |
| Bdh1                              | NM_053995                 | 10754931        | 0.83        | -55         | 0           | grey        | 3-hydroxybutyrate dehydrogenase, type 1                                                           |
| Bdh2                              | NM_001106473              | 10819192        | 0.78        | -13         | 0           | grey        | 3-hydroxybutyrate dehydrogenase, type 2                                                           |
| Bloc1s1                           | NM_001105941              | 10899959        | 0.82        | -41         | 3.5         | ylw         | biogenesis of lysosomal organelles complex-1, subunit 1                                           |
| Carkd                             | NM_001108402              | 10792943        | 0.79        | -23         | 14.6        | brwn        | carbohydrate kinase domain containing                                                             |
| <b>Cdipt</b>                      | <b>NM_138899</b>          | <b>10710985</b> | <b>1.30</b> | <b>113</b>  | <b>47.3</b> | <b>turq</b> | <b>CDP-diacylglycerol--inositol 3-phosphatidyltransferase (phosphatidylinositol synthase)</b>     |
| Cox4nb                            | NM_001012165              | 10811493        | 0.81        | -16         | 10.5        | blue        | COX4 neighbor                                                                                     |
| Decr1                             | NM_057197                 | 10875631        | 0.72        | -229        | 0           | grey        | 2,4-dienoyl CoA reductase 1, mitochondrial                                                        |
| Dhrs1                             | NM_001007621              | 10783917        | 1.29        | 35          | 6.1         | turq        | dehydrogenase/reductase (SDR family) member 1                                                     |
| Dhrs7b                            | NM_001008507              | 10734190        | 0.83        | -26         | 10.9        | ylw         | dehydrogenase/reductase (SDR family) member 7B                                                    |
| Echs1                             | NM_078623                 | 10726611        | 0.82        | -159        | 0           | grey        | enoyl Coenzyme A hydratase, short chain, 1, mitochondrial                                         |
| Fa2h                              | NM_001135583              | 10811126        | 1.31        | 12          | 1.6         | red         | fatty acid 2-hydroxylase                                                                          |

|                                         |                           |                 |             |             |             |             |                                                                              |
|-----------------------------------------|---------------------------|-----------------|-------------|-------------|-------------|-------------|------------------------------------------------------------------------------|
| Gsta2                                   | NM_017013                 | 10911802        | 0.75        | -47         | 0           | grey        | glutathione S-transferase A2                                                 |
| Hmbs                                    | NM_013168                 | 10916753        | 0.77        | -78         | 18.6        | brwn        | hydroxymethylbilane synthase                                                 |
| Hmgcl                                   | NM_024386                 | 10872949        | 0.79        | -54         | 14.2        | brwn        | 3-hydroxymethyl-3-methylglutaryl-Coenzyme A lyase                            |
| Hpgd                                    | NM_024390                 | 10791522        | 0.82        | -12         | 0.4         | ylw         | hydroxyprostaglandin dehydrogenase 15 (NAD)                                  |
| Hsd17b10                                | NM_031682                 | 10933130        | 0.79        | -157        | 2.6         | brwn        | hydroxysteroid (17-beta) dehydrogenase 10                                    |
| Inpp1                                   | NM_022944                 | 10724080        | 1.21        | -27         | 28.4        | turq        | inositol polyphosphate phosphatase-like 1                                    |
| <b>Kctd14</b>                           | <b>ENSRNOT00000016654</b> | <b>10708782</b> | <b>0.81</b> | <b>-11</b>  | <b>28.4</b> | <b>brwn</b> | <b>potassium channel tetramerisation domain containing 14</b>                |
| <b>LOC100360067</b>                     | <b>ENSRNOT00000047723</b> | <b>10927610</b> | <b>0.69</b> | <b>-20</b>  | <b>47.3</b> | <b>ylw</b>  | <b>SEC61, gamma subunit-like</b>                                             |
| LOC500959                               | NM_001033072              | 10915837        | 0.80        | -389        | 16.3        | turq        | triosephosphate isomerase                                                    |
| LOC687295                               | ENSRNOT00000057096        | 10720161        | 0.76        | -68         | 0           | grey        | similar to translocase of inner mitochondrial membrane 50 homolog            |
| Mlph                                    | NM_001012135              | 10925303        | 0.82        | -11         | 0           | grey        | melanophilin                                                                 |
| Ndor1                                   | NM_001107818              | 10843380        | 1.29        | 27          | 22.4        | turq        | NADPH dependent diflavin oxidoreductase 1                                    |
| Ndst2                                   | NM_001105740              | 10779054        | 1.28        | 25          | 2.1         | ylw         | N-deacetylase/N-sulfotransferase (heparan glucosaminyl) 2                    |
| Ndufa1                                  | NM_001108813              | 10931991        | 0.82        | -104        | 22.5        | ylw         | NADH dehydrogenase (ubiquinone) 1 alpha subcomplex, 1                        |
| Ndufa2                                  | NM_001106153              | 10803995        | 0.82        | -25         | 31.2        | ylw         | NADH dehydrogenase (ubiquinone) 1 alpha subcomplex, 2                        |
| Ndufa3                                  | ENSRNOT00000019141        | 10718552        | 0.82        | -108        | 3.0         | brwn        | NADH dehydrogenase (ubiquinone) 1 alpha subcomplex, 3                        |
| Ndufa8                                  | NM_001047862              | 10844726        | 0.82        | -90         | 18.7        | brwn        | NADH dehydrogenase (ubiquinone) 1 alpha subcomplex, 8                        |
| Ndufb8                                  | NM_001106360              | 10730383        | 0.75        | -137        | 20.1        | ylw         | NADH dehydrogenase (ubiquinone) 1 beta subcomplex 8                          |
| Ndufs8                                  | NM_001106322              | 10727398        | 0.82        | -104        | 24.0        | blue        | NADH dehydrogenase (ubiquinone) Fe-S protein 8                               |
| Nme2                                    | NM_031833                 | 10746271        | 0.83        | -309        | 22.4        | ylw         | non-metastatic cells 2, protein (NM23B) expressed in                         |
| Nme6                                    | NM_001191884              | 10913545        | 0.83        | -17         | 1.2         | brwn        | non-metastatic cells 6, protein expressed in (nucleoside-diphosphate kinase) |
| Pcyt2                                   | NM_053568                 | 10749689        | 0.81        | -37         | 19.6        | brwn        | phosphate cytidyltransferase 2, ethanolamine                                 |
| Pdxk                                    | NM_031769                 | 10829191        | 0.76        | -25         | 0.2         | red         | pyridoxal (pyridoxine, vitamin B6) kinase                                    |
| Pigw                                    | NM_194461                 | 10745782        | 1.27        | 35          | 6.4         | brwn        | phosphatidylinositol glycan anchor biosynthesis, class W                     |
| Pop5                                    | NM_001105752              | 10762717        | 0.76        | -23         | 5.8         | brwn        | processing of precursor 5, ribonuclease P/MRP subunit (S. cerevisiae)        |
| Prr14                                   | ENSRNOT00000055002        | 10711053        | 1.22        | 11          | 8.2         | ylw         | proline rich 14                                                              |
| Pus1                                    | NM_001108699              | 10882238        | 0.82        | -14         | 0           | grey        | pseudouridylate synthase-like 1                                              |
| Pycr2                                   | NM_001012208              | 10766240        | 0.82        | -12         | 12.1        | brwn        | pyrroline-5-carboxylate reductase family, member 2                           |
| Sec14l1                                 | NM_001108309              | 10739866        | 1.21        | 31          | 1.6         | ylw         | SEC14-like 1 (S. cerevisiae)                                                 |
| <b>Sec61g</b>                           | <b>NM_001135020</b>       | <b>10778555</b> | <b>0.67</b> | <b>-237</b> | <b>47.7</b> | <b>ylw</b>  | <b>SEC61, gamma subunit</b>                                                  |
| Sepw1                                   | NM_013027                 | 10719212        | 0.76        | -20         | 0           | grey        | selenoprotein W, 1                                                           |
| Slc25a35                                | NM_001109033              | 10734822        | 1.26        | 19          | 10.8        | ylw         | solute carrier family 25, member 35                                          |
| Slc25a42                                | NM_001127590              | 10787611        | 1.24        | 17          | 0.9         | ylw         | solute carrier family 25, member 42                                          |
| Slc29a2                                 | NM_031738                 | 10712962        | 1.31        | 12          | 6.8         | ylw         | solute carrier family 29 (nucleoside transporters), member 2                 |
| Slc38a3                                 | NM_145776                 | 10920122        | 1.23        | 38          | 1.8         | turq        | solute carrier family 38, member 3                                           |
| Slc43a2                                 | NM_001105812              | 10735959        | 1.27        | 37          | 8.7         | brwn        | solute carrier family 43, member 2                                           |
| Slco3a1                                 | NM_177481                 | 10722818        | 1.24        | 17          | 24.5        | ylw         | solute carrier organic anion transporter family, member 3a1                  |
| Smpx                                    | NM_053395                 | 10938060        | 0.77        | -32         | 0.9         | ylw         | small muscle protein, X-linked                                               |
| <b>St3gal2</b>                          | <b>NM_031695</b>          | <b>10808034</b> | <b>1.24</b> | <b>21</b>   | <b>25.4</b> | <b>brwn</b> | <b>ST3 beta-galactoside alpha-2,3-sialyltransferase 2</b>                    |
| Timm8a1                                 | NM_053370                 | 10939289        | 0.77        | -59         | 16.3        | ylw         | translocase of inner mitochondrial membrane 8 homolog a1 (yeast)             |
| Tomm40b                                 | NM_001083338              | 10769815        | 0.77        | -17         | 0           | grey        | translocase of outer mitochondrial membrane 40 homolog B (yeast)             |
| Xpo6                                    | NM_001011935              | 10725618        | 1.25        | 90          | 4.3         | ylw         | exportin 6                                                                   |
| <b>PROTEOLYSIS</b>                      |                           |                 |             |             |             |             |                                                                              |
| March2                                  | NM_001034108              | 10901152        | 0.83        | -67         | 0           | grey        | membrane-associated ring finger (C3HC4) 2                                    |
| March8                                  | NM_001107882              | 10858133        | 0.79        | -107        | 0           | grey        | membrane-associated ring finger (C3HC4) 8                                    |
| Otub1                                   | NM_001106332              | 10728377        | 0.83        | -44         | 16.5        | blue        | OTU domain, ubiquitin aldehyde binding 1                                     |
| <b>Psmb5</b>                            | <b>NM_001105727</b>       | <b>10783599</b> | <b>0.82</b> | <b>-173</b> | <b>24.6</b> | <b>brwn</b> | <b>proteasome (prosome, macropain) subunit, beta type 5</b>                  |
| Psm2                                    | NM_017257                 | 10793365        | 0.79        | -146        | 2.0         | ylw         | proteasome (prosome, macropain) activator subunit 2                          |
| Rad23a                                  | NM_001013190              | 10806650        | 1.21        | 50          | 3.3         | brwn        | RAD23 homolog A (S. cerevisiae)                                              |
| Rnf8                                    | NM_001025727              | 10828904        | 1.21        | 17          | 30.8        | turq        | ring finger protein 8                                                        |
| Spink8                                  | NM_001106860              | 10913538        | 0.83        | -17         | 0           | grey        | serine peptidase inhibitor, Kazal type 8                                     |
| <b>Tmprss2</b>                          | <b>ENSRNOT00000044101</b> | <b>10753458</b> | <b>0.82</b> | <b>-35</b>  | <b>21.6</b> | <b>brwn</b> | <b>transmembrane protease, serine 2</b>                                      |
| Tpp1                                    | NM_031357                 | 10724529        | 1.26        | 93          | 16.0        | ylw         | tripeptidyl peptidase I                                                      |
| Usp21                                   | NM_001127638              | 10769854        | 1.34        | 39          | 19.0        | ylw         | ubiquitin specific peptidase 21                                              |
| Vps37b                                  | NM_001105928              | 10758344        | 1.20        | 15          | 7.9         | turq        | vacuolar protein sorting 37 homolog B (S. cerevisiae)                        |
| <b>RECEPTORS &amp; BINDING PROTEINS</b> |                           |                 |             |             |             |             |                                                                              |
| Aip                                     | NM_172327                 | 10727445        | 0.77        | -27         | 5.5         | blue        | aryl-hydrocarbon receptor-interacting protein                                |
| Il18bp                                  | NM_053374                 | 10724131        | 1.35        | 22          | 16.4        | ylw         | interleukin 18 binding protein                                               |
| Itgb3bp                                 | NM_001013213              | 10878272        | 0.79        | -16         | 1.06        | green       | integrin beta 3 binding protein (beta3-endonexin)                            |
| Nptn                                    | NM_019380                 | 10910463        | 1.25        | 113         | 0           | grey        | neuroplastin                                                                 |
| P2ry2                                   | NM_017255                 | 10724042        | 1.25        | 27          | 16.0        | turq        | purinergic receptor P2Y, G-protein coupled, 2                                |
| Pgrmc1                                  | NM_021766                 | 10936341        | 0.73        | -195        | 18.3        | brwn        | progesterone receptor type 2 membrane component 1                            |
| <b>Plxnb2</b>                           | <b>NM_001108106</b>       | <b>10906169</b> | <b>1.20</b> | <b>62</b>   | <b>48.0</b> | <b>turq</b> | <b>plexin B2</b>                                                             |
| <b>S100a6</b>                           | <b>NM_053485</b>          | <b>10817065</b> | <b>0.71</b> | <b>-36</b>  | <b>44.8</b> | <b>ylw</b>  | <b>S100 calcium binding protein A6</b>                                       |
| S100b                                   | NM_013191                 | 10832441        | 0.72        | -12         | 3.0         | brwn        | S100 calcium binding protein B                                               |
| Sec24c                                  | BC168663                  | 10782323        | 1.28        | 71          | 36.3        | turq        | SEC24 related gene family, member C (S. cerevisiae)                          |
| Wbp11                                   | NM_001009661              | 10866488        | 1.26        | 54          | 7.3         | ylw         | WW domain binding protein 11                                                 |
| <b>SIGNALING</b>                        |                           |                 |             |             |             |             |                                                                              |
| Aak1                                    | NM_001173450              | 10857002        | 1.22        | 27          | 14.3        | ylw         | AP2 associated kinase 1                                                      |

|                      |                     |                 |             |            |             |              |                                                                                                                  |
|----------------------|---------------------|-----------------|-------------|------------|-------------|--------------|------------------------------------------------------------------------------------------------------------------|
| Arhgap8              | NM_001004242        | 10898268        | 1.29        | 32         | 4.4         | brwn         | Rho GTPase activating protein 8                                                                                  |
| Btbd12               | ENSRNOT00000033919  | 10731872        | 1.35        | 18         | 0           | grey         | BTB (POZ) domain containing 12                                                                                   |
| <b>Cdgap</b>         | <b>NM_001105879</b> | <b>10751255</b> | <b>1.30</b> | <b>15</b>  | <b>22.0</b> | <b>brwn</b>  | <b>Cdc42 GTPase-activating protein</b>                                                                           |
| Cks1b                | NM_001135749        | 10824513        | 0.81        | -52        | 11.7        | ylw          | CDC28 protein kinase regulatory subunit 1B (chr2)                                                                |
| Cks1b                | NM_001135749        | 10878032        | 0.79        | -56        | 18.0        | ylw          | CDC28 protein kinase regulatory subunit 1B (chr5)                                                                |
| Dab2ip               | NM_138710           | 10835779        | 1.25        | 12         | 13.6        | turq         | DAB2 interacting protein                                                                                         |
| Dbil5                | NM_021596           | 10736064        | 0.73        | -11        | 6.86        | green        | diazepam binding inhibitor-like 5                                                                                |
| Defb27               | NM_001037519        | 10850818        | 0.64        | -12        | 0           | grey         | defensin beta 27                                                                                                 |
| Enpp1                | NM_053535           | 10702250        | 1.25        | 111        | 2.5         | ylw          | ectonucleotide pyrophosphatase/phosphodiesterase 1                                                               |
| Hspb9                | NM_001108835        | 10738223        | 0.72        | -25        | 7.31        | green        | heat shock protein, alpha-crystallin-related, B9                                                                 |
| Ipmk                 | NM_134417           | 10832680        | 0.81        | -57        | 23.6        | blue         | inositol polyphosphate multikinase                                                                               |
| Letm2                | NM_001012158        | 10788841        | 1.20        | 11         | 7.8         | ylw          | leucine zipper-EF-hand containing transmembrane protein 2                                                        |
| LOC100361629         | ENSRNOT00000061017  | 10812779        | 0.81        | -156       | 0           | grey         | ERBB2 interacting protein-like                                                                                   |
| Magmas               | NM_001100136        | 10731783        | 0.74        | -25        | 16.7        | ylw          | mitochondria-associated protein involved in granulocyte-macrophage colony-stimulating factor signal transduction |
| Mapk8ip3             | NM_001100673        | 10741268        | 1.25        | 11         | 13.9        | ylw          | mitogen-activated protein kinase 8 interacting protein 3                                                         |
| Mapkbp1              | NM_001108589        | 10838927        | 1.33        | 12         | 8.2         | ylw          | mitogen activated protein kinase binding protein 1                                                               |
| Nek6                 | NM_182953           | 10835964        | 0.81        | -12        | 5.3         | brwn         | NIMA (never in mitosis gene a)-related kinase 6                                                                  |
| Nisch                | ENSRNOT00000036910  | 10790096        | 1.32        | 106        | 12.3        | ylw          | nischarin                                                                                                        |
| Pdk2                 | NM_030872           | 10746469        | 1.24        | 146        | 13.4        | brwn         | pyruvate dehydrogenase kinase, isozyme 2                                                                         |
| Pik3r4               | NM_001108777        | 10912757        | 1.22        | 25         | 17.1        | turq         | phosphoinositide-3-kinase, regulatory subunit 4                                                                  |
| Ppfia1               | NM_001106320        | 10727199        | 1.22        | 29         | 1.7         | ylw          | protein tyrosine phosphatase, receptor type, f polypeptide (PTPRF), interacting protein (liprin), alpha 1        |
| Ppp1r12a             | NM_053890           | 10895310        | 1.32        | 59         | 3.8         | ylw          | protein phosphatase 1, regulatory (inhibitor) subunit 12A                                                        |
| Ptprs                | NM_019140           | 10930942        | 1.28        | 27         | 36.1        | ylw          | protein tyrosine phosphatase, receptor type, S                                                                   |
| Rab11b               | NM_032617           | 10901158        | 1.20        | 116        | 8.8         | brwn         | RAB11B, member RAS oncogene family                                                                               |
| Rab15                | NM_001011902        | 10757442        | 0.76        | -19        | 5.2         | turq         | RAB, member RAS oncogene family-like 5                                                                           |
| Reps1                | NM_001106264        | 10701880        | 1.25        | 23         | 1.4         | ylw          | RALBP1 associated Eps domain containing 1                                                                        |
| RGD1309362           | BC098065            | 10801973        | 0.77        | -41        | 9.7         | turq         | similar to interferon-inducible GTPase                                                                           |
| <b>RGD1562638</b>    | <b>NM_001100944</b> | <b>10788692</b> | <b>1.23</b> | <b>14</b>  | <b>####</b> | <b>green</b> | <b>similar to MAP/microtubule affinity-regulating kinase 3</b>                                                   |
| Rhoc                 | NM_001106461        | 10818108        | 0.78        | -45        | 0           | grey         | ras homolog gene family, member C                                                                                |
| Rnd2                 | NM_001010953        | 10738423        | 0.79        | -13        | 1.5         | ylw          | Rho family GTPase 2                                                                                              |
| Rras2                | NM_001013434        | 10724993        | 0.79        | -70        | 0           | grey         | related RAS viral (r-ras) oncogene homolog 2                                                                     |
| Snx8                 | NM_001105912        | 10756953        | 0.80        | -12        | 2.2         | brwn         | sorting nexin 8                                                                                                  |
| Stap2                | NM_001025026        | 10931068        | 0.81        | -12        | 15.3        | brwn         | signal transducing adaptor family member 2                                                                       |
| Stk36                | NM_001173986        | 10924363        | 1.31        | 12         | 15.0        | blue         | serine/threonine kinase 36 (fused homolog, Drosophila)                                                           |
| <b>TRANSCRIPTION</b> |                     |                 |             |            |             |              |                                                                                                                  |
| Arid1a               | NM_001106635        | 10872533        | 1.29        | 39         | 2.8         | ylw          | AT rich interactive domain 1A (SWI-like)                                                                         |
| Asb13                | NM_001108420        | 10799376        | 0.81        | -39        | 0           | grey         | ankyrin repeat and SOCS box-containing 13                                                                        |
| Brpf3                | NM_001107615        | 10828791        | 1.29        | 11         | 10.7        | ylw          | bromodomain and PHD finger containing, 3                                                                         |
| C1d                  | NM_001106021        | 10774331        | 0.77        | -111       | 24.7        | ylw          | nuclear DNA binding protein                                                                                      |
| Ccdc112              | NM_001109124        | 10804371        | 1.24        | 15         | 0.9         | ylw          | coiled-coil domain containing 112                                                                                |
| Ccdc125              | NM_001134761        | 10812756        | 0.82        | -12        | 5.9         | brwn         | coiled-coil domain containing 125                                                                                |
| Ccdc142              | ENSRNOT00000035329  | 10856601        | 1.28        | 13         | 0           | grey         | coiled-coil domain containing 142                                                                                |
| Ccdc55               | NM_001037189        | 10736476        | 1.33        | 59         | 10.4        | brwn         | coiled-coil domain containing 55                                                                                 |
| Cnot3                | NM_001107471        | 10718520        | 1.30        | 26         | 6.0         | turq         | CCR4-NOT transcription complex, subunit 3                                                                        |
| Cnot4                | NM_001037782        | 10861778        | 1.21        | 63         | 16.3        | brwn         | CCR4-NOT transcription complex, subunit 4                                                                        |
| <b>Dnlz</b>          | <b>NR_024073</b>    | <b>10843693</b> | <b>0.83</b> | <b>-33</b> | <b>22.1</b> | <b>brwn</b>  | <b>DNL-type zinc finger</b>                                                                                      |
| Dpf2                 | NM_001108516        | 10728046        | 1.21        | 66         | 10.4        | brwn         | D4, zinc and double PHD fingers family 2                                                                         |
| Gtf3c2               | NM_001025120        | 10883125        | 1.42        | 53         | 3.4         | ylw          | general transcription factor IIIC, polypeptide 2, beta                                                           |
| <b>Hes6</b>          | <b>NM_001013179</b> | <b>10929835</b> | <b>0.83</b> | <b>-17</b> | <b>22.3</b> | <b>brwn</b>  | <b>hairy and enhancer of split 6 (Drosophila)</b>                                                                |
| Hint1                | NM_001109607        | 10733676        | 0.83        | -156       | 23.0        | ylw          | histidine triad nucleotide binding protein 1 (chr10)                                                             |
| Hint1                | NM_001109607        | 10862834        | 0.82        | -195       | 25.4        | ylw          | histidine triad nucleotide binding protein 1 (chr4)                                                              |
| Klf4                 | NM_053713           | 10876838        | 1.27        | 23         | 2.7         | brwn         | Kruppel-like factor 4 (gut)                                                                                      |
| Klf5                 | NM_053394           | 10781829        | 1.28        | 11         | 0           | grey         | Kruppel-like factor 5                                                                                            |
| LOC100363361         | ENSRNOT00000028553  | 10824904        | 1.31        | 18         | 5.7         | turq         | zinc finger protein 687-like                                                                                     |
| LOC678741            | ENSRNOT00000068268  | 10704467        | 1.22        | 15         | 6.1         | ylw          | similar to Zinc finger CCCH-type domain containing protein 6                                                     |
| LOC680290            | XM_002728448        | 10796912        | 0.74        | -21        | 0           | grey         | similar to Zinc finger protein 208                                                                               |
| LOC691280            | ENSRNOT00000043813  | 10881482        | 0.81        | -43        | 3.9         | ylw          | similar to Zinc finger protein 180 (HHZ168)                                                                      |
| Med20                | NM_001013178        | 10926323        | 0.79        | -25        | 0           | grey         | mediator complex subunit 20                                                                                      |
| Med23                | ENSRNOT00000032424  | 10717201        | 1.28        | 37         | 9.6         | ylw          | mediator complex subunit 23                                                                                      |
| Ncoa6                | ENSRNOT00000024714  | 10851004        | 1.28        | 23         | 11.9        | ylw          | nuclear receptor coactivator 6                                                                                   |
| Nfatc3               | NM_001108447        | 10807452        | 1.22        | 27         | 1.8         | ylw          | nuclear factor of activated T-cells, cytoplasmic, calcineurin-dependent 3                                        |
| Nr2c1                | NM_145780           | 10894974        | 1.22        | 29         | 0           | grey         | nuclear receptor subfamily 2, group C, member 1                                                                  |
| Nudt14               | NM_001106760        | 10892381        | 0.74        | -33        | 33.3        | ylw          | nudix (nucleoside diphosphate linked moiety X)-type motif 14                                                     |
| Nxf1                 | NM_021579           | 10713626        | 1.30        | 144        | 20.6        | ylw          | nuclear RNA export factor 1                                                                                      |
| Paxip1               | NM_001107844        | 10852694        | 1.28        | 26         | 8.9         | ylw          | PAX interacting (with transcription-activation domain) protein 1                                                 |
| Pelp1                | NM_001024270        | 10744441        | 1.22        | 18         | 23.1        | turq         | proline, glutamic acid and leucine rich protein 1                                                                |
| Phb                  | NM_031851           | 10805784        | 0.77        | -128       | 2.5         | brwn         | prohibitin                                                                                                       |

|                                               |                     |                 |             |             |             |            |                                                                       |
|-----------------------------------------------|---------------------|-----------------|-------------|-------------|-------------|------------|-----------------------------------------------------------------------|
| Polr2d                                        | NM_001108886        | 10800667        | 0.81        | -66         | 22.2        | ylw        | polymerase (RNA) II (DNA directed) polypeptide D                      |
| Polr2j                                        | NM_001105921        | 10761070        | 0.77        | -38         | 16.4        | brwn       | polymerase (RNA) II (DNA directed) polypeptide J                      |
| RGD1560011                                    | NM_001195564        | 10910619        | 1.26        | 41          | 3.5         | ylw        | similar to Nuclear membrane binding protein NUCLING                   |
| RGD1560058                                    | NM_001105821        | 10745551        | 0.81        | -11         | 0.92        | green      | similar to prohibitin                                                 |
| Sdf2l1                                        | NM_001109433        | 10752531        | 0.73        | -125        | 19.2        | brwn       | stromal cell-derived factor 2-like 1                                  |
| Snrpd2                                        | NM_001109399        | 10704755        | 0.80        | -38         | 16.8        | ylw        | small nuclear ribonucleoprotein D2 polypeptide                        |
| Snrpg                                         | NM_001135085        | 10856965        | 0.66        | -106        | 37.9        | ylw        | small nuclear ribonucleoprotein polypeptide G                         |
| Snw1                                          | NM_001109279        | 10891373        | 1.21        | 66          | 0.2         | mgnt       | SNW domain containing 1                                               |
| Tcfcp2l1                                      | NM_001107170        | 10763531        | 1.23        | 13          | 10.2        | turq       | transcription factor CP2-like 1                                       |
| Tle3                                          | NM_053400           | 10910641        | 1.32        | 22          | 21.0        | turq       | transducin-like enhancer of split 3 (E(sp1) homolog, Drosophila)      |
| Tnni3k                                        | AY303692            | 10827484        | 0.72        | -11         | 2.8         | brwn       | TNNI3 interacting kinase                                              |
| Tsc22d2                                       | NM_001191960        | 10815534        | 1.29        | 50          | 0           | grey       | TSC22 domain family, member 2                                         |
| Zcchc2                                        | BC100090            | 10763284        | 1.24        | 44          | 0           | grey       | zinc finger, CCHC domain containing 2                                 |
| Zcchc7                                        | NM_001106658        | 10868669        | 1.23        | 21          | 0           | grey       | zinc finger, CCHC domain containing 7                                 |
| Zcchc9                                        | NM_001013156        | 10820327        | 0.65        | -128        | 0           | grey       | zinc finger, CCHC domain containing 9                                 |
| Zfand5                                        | NM_001106356        | 10714338        | 1.22        | 89          | 0           | grey       | zinc finger, AN1-type domain 5                                        |
| Zfp219                                        | NM_001007681        | 10783232        | 1.52        | 34          | 15.9        | ylw        | zinc finger protein 219                                               |
| Zfp385d                                       | NM_001013992        | 10782437        | 1.28        | 15          | 8.7         | brwn       | zinc finger protein 385D                                              |
| Zfp709l2                                      | NM_001163062        | 10901051        | 0.82        | -28         | 4.6         | ylw        | zinc finger protein 709-like 2                                        |
| Zfyve26                                       | NM_001108038        | 10890809        | 1.35        | 20          | 11.1        | ylw        | zinc finger, FYVE domain containing 26                                |
| Zmym6                                         | NM_001108681        | 10872114        | 1.32        | 35          | 0.6         | ylw        | zinc finger, MYM-type 6                                               |
| Znf574                                        | NM_001024258        | 10705100        | 1.24        | 12          | 6.0         | ylw        | zinc finger protein 574                                               |
| Znf652                                        | NM_001080207        | 10737651        | 1.22        | 49          | 11.9        | turq       | zinc finger protein 652                                               |
| <b>TRANSLATION &amp; PROTEIN MODIFICATION</b> |                     |                 |             |             |             |            |                                                                       |
| LOC679154                                     | ENSRNOT00000061278  | 10803440        | 1.36        | 25          | 0           | grey       | similar to DNA-directed RNA polymerase II largest subunit (RPB1)      |
| Bat1                                          | NM_133300           | 10831135        | 1.23        | 85          | 1.4         | ylw        | HLA-B associated transcript 1                                         |
| Cpsf7                                         | NM_001014245        | 10713894        | 1.29        | 19          | 0           | grey       | cleavage and polyadenylation specific factor 7, 59kDa                 |
| Eif2b2                                        | NM_032058           | 10886014        | 0.80        | -40         | 2.2         | brwn       | eukaryotic translation initiation factor 2B, subunit 2 beta           |
| Gga3                                          | NM_001108304        | 10739588        | 0.81        | -81         | 0           | grey       | golgi associated, gamma adaptin ear containing, ARF binding protein 3 |
| Grpel1                                        | NM_024487           | 10777442        | 0.79        | -49         | 10.8        | ylw        | GrpE-like 1, mitochondrial                                            |
| Hnrnpa3                                       | NM_198132           | 10837038        | 1.27        | 468         | 10.5        | blue       | heterogeneous nuclear ribonucleoprotein A3 (chr3)                     |
| Hnrnpa3                                       | NM_001111295        | 10822786        | 1.28        | 526         | 7.9         | blue       | heterogeneous nuclear ribonucleoprotein A3 (chr2)                     |
| Hnrnpa3                                       | NM_001111295        | 10869264        | 1.29        | 489         | 9.8         | blue       | heterogeneous nuclear ribonucleoprotein A3 (chr5)                     |
| Hnrnpa3                                       | NM_001111295        | 10883583        | 1.23        | 346         | 1.3         | blue       | heterogeneous nuclear ribonucleoprotein A3 (chr6)                     |
| Hnrnpa3                                       | NM_001111294        | 10717591        | 1.29        | 466         | 6.7         | blue       | heterogeneous nuclear ribonucleoprotein A3 (chr1)                     |
| Lmf2                                          | NM_001079939        | 10906270        | 1.21        | 32          | 15.4        | brwn       | lipase maturation factor 2                                            |
| Mrpl12                                        | NM_001029900        | 10740153        | 0.80        | -22         | 10.7        | brwn       | mitochondrial ribosomal protein L12                                   |
| <b>Mrpl20</b>                                 | <b>NM_001109428</b> | <b>10874701</b> | <b>0.82</b> | <b>-34</b>  | <b>46.6</b> | <b>ylw</b> | <b>mitochondrial ribosomal protein L20</b>                            |
| Mrpl22                                        | NM_001105781        | 10733782        | 0.74        | -48         | 32.3        | ylw        | mitochondrial ribosomal protein L22                                   |
| <b>Mrpl54</b>                                 | <b>NM_001106770</b> | <b>10893586</b> | <b>0.82</b> | <b>-154</b> | <b>48.5</b> | <b>ylw</b> | <b>mitochondrial ribosomal protein L54</b>                            |
| mrpl9                                         | NM_001007696        | 10817252        | 0.81        | -67         | 6.5         | ylw        | mitochondrial ribosomal protein L9                                    |
| Mrps18c                                       | NM_001105996        | 10775532        | 0.82        | -273        | 16.5        | ylw        | mitochondrial ribosomal protein S18C                                  |
| <b>Pfdn5</b>                                  | <b>NM_001106794</b> | <b>10899531</b> | <b>0.76</b> | <b>-153</b> | <b>54.3</b> | <b>ylw</b> | <b>prefoldin subunit 5</b>                                            |
| Prpf8                                         | NM_001191590        | 10735897        | 1.21        | 103         | 3.0         | ylw        | PRP8 pre-mRNA processing factor 8 homolog (S. cerevisiae)             |
| Rbm4                                          | ENSRNOT00000026621  | 10727643        | 1.27        | 34          | 12.8        | ylw        | RNA binding motif protein 4                                           |
| RGD1561984                                    | ENSRNOT00000041555  | 10917299        | 0.81        | -39         | 41.7        | ylw        | similar to ribosomal protein L27a                                     |
| RGD1562404                                    | ENSRNOT00000051652  | 10896040        | 0.81        | -30         | 20.0        | ylw        | similar to ribosomal protein S18                                      |
| Rnps1                                         | NM_001011890        | 10732058        | 1.20        | 63          | 18.8        | turq       | ribonucleic acid binding protein S1                                   |
| <b>Rpl13a</b>                                 | <b>NM_173340</b>    | <b>10797935</b> | <b>0.78</b> | <b>-556</b> | <b>47.9</b> | <b>ylw</b> | <b>ribosomal protein L13A (chr17)</b>                                 |
| <b>Rpl13a</b>                                 | <b>NM_173340</b>    | <b>10833586</b> | <b>0.79</b> | <b>-527</b> | <b>48.4</b> | <b>ylw</b> | <b>ribosomal protein L13A (chr20)</b>                                 |
| Rpl15                                         | NM_139114           | 10779331        | 0.82        | -17         | 11.7        | brwn       | ribosomal protein L15                                                 |
| <b>Rpl22</b>                                  | <b>NM_031104</b>    | <b>10863772</b> | <b>0.79</b> | <b>-124</b> | <b>53.8</b> | <b>ylw</b> | <b>ribosomal protein L22 (chr4)</b>                                   |
| <b>Rpl22</b>                                  | <b>NM_031104</b>    | <b>10897802</b> | <b>0.80</b> | <b>-97</b>  | <b>57.2</b> | <b>ylw</b> | <b>ribosomal protein L22 (chr7)</b>                                   |
| <b>Rpl22l1</b>                                | <b>NM_001108548</b> | <b>10814650</b> | <b>0.74</b> | <b>-75</b>  | <b>43.3</b> | <b>ylw</b> | <b>ribosomal protein L22 like 1 (chr2)</b>                            |
| Rpl22l1                                       | NM_001108548        | 10839803        | 0.73        | -84         | 42.4        | ylw        | ribosomal protein L22 like 1 (chr3)                                   |
| <b>Rpl31</b>                                  | <b>NM_022506</b>    | <b>10760811</b> | <b>0.83</b> | <b>-395</b> | <b>51.4</b> | <b>ylw</b> | <b>ribosomal protein L31</b>                                          |
| <b>Rpl35a</b>                                 | <b>NM_021264</b>    | <b>10727462</b> | <b>0.79</b> | <b>-196</b> | <b>66.1</b> | <b>ylw</b> | <b>ribosomal protein L35a (chr1)</b>                                  |
| <b>Rpl35a</b>                                 | <b>NM_021264</b>    | <b>10740558</b> | <b>0.80</b> | <b>-138</b> | <b>65.3</b> | <b>ylw</b> | <b>ribosomal protein L35a (chr10)</b>                                 |
| <b>Rpl35a</b>                                 | <b>NM_021264</b>    | <b>10754694</b> | <b>0.79</b> | <b>-201</b> | <b>65.8</b> | <b>ylw</b> | <b>ribosomal protein L35a (chr11)</b>                                 |
| <b>Rpl35a</b>                                 | <b>NM_021264</b>    | <b>10760018</b> | <b>0.79</b> | <b>-196</b> | <b>66.1</b> | <b>ylw</b> | <b>ribosomal protein L35a (chr12)</b>                                 |
| <b>Rpl35a</b>                                 | <b>NM_021264</b>    | <b>10797473</b> | <b>0.79</b> | <b>-179</b> | <b>68.5</b> | <b>ylw</b> | <b>ribosomal protein L35a (chr17)</b>                                 |
| <b>Rpl35a</b>                                 | <b>NM_021264</b>    | <b>10847995</b> | <b>0.79</b> | <b>-173</b> | <b>56.9</b> | <b>ylw</b> | <b>ribosomal protein L35a (chr3)</b>                                  |
| <b>Rpl35a</b>                                 | <b>NM_021264</b>    | <b>10873916</b> | <b>0.79</b> | <b>-196</b> | <b>66.1</b> | <b>ylw</b> | <b>ribosomal protein L35a (chr5)</b>                                  |
| <b>Rpl35a</b>                                 | <b>NM_021264</b>    | <b>10885205</b> | <b>0.79</b> | <b>-178</b> | <b>65.2</b> | <b>ylw</b> | <b>ribosomal protein L35a (chr6)</b>                                  |
| Rpl36                                         | NM_022504           | 10890858        | 0.83        | -82         | 3.7         | ylw        | ribosomal protein L36                                                 |
| <b>Rpl39</b>                                  | <b>NM_012875</b>    | <b>10776291</b> | <b>0.63</b> | <b>-378</b> | <b>52.3</b> | <b>ylw</b> | <b>ribosomal protein L39 (chr14)</b>                                  |
| Rpl39                                         | NM_012875           | 10782917        | 0.66        | -387        | 41.3        | ylw        | ribosomal protein L39 (chr15)                                         |
| <b>Rpl39</b>                                  | <b>NM_012875</b>    | <b>10803301</b> | <b>0.64</b> | <b>-353</b> | <b>51.9</b> | <b>ylw</b> | <b>ribosomal protein L39 (chr18)</b>                                  |
| Rpl39                                         | NM_012875           | 10829688        | 0.66        | -387        | 41.3        | ylw        | ribosomal protein L39 (chr20)                                         |

|                                    |                           |                 |             |             |             |             |                                                       |
|------------------------------------|---------------------------|-----------------|-------------|-------------|-------------|-------------|-------------------------------------------------------|
| Rpl39                              | NM_012875                 | 10895022        | 0.66        | -387        | 41.3        | ylw         | ribosomal protein L39 (chr7)                          |
| <b>Rpl39</b>                       | <b>NM_012875</b>          | <b>10932013</b> | <b>0.65</b> | <b>-453</b> | <b>48.1</b> | <b>ylw</b>  | <b>ribosomal protein L39 (chrX)</b>                   |
| Rpl41                              | NM_139083                 | 10774894        | 0.75        | -549        | 39.3        | ylw         | ribosomal protein L41                                 |
| Rps10                              | NM_031109                 | 10742029        | 0.83        | -47         | 20.0        | ylw         | ribosomal protein S10                                 |
| <b>Rps14</b>                       | <b>NM_022672</b>          | <b>10802007</b> | <b>0.70</b> | <b>-329</b> | <b>76.2</b> | <b>ylw</b>  | <b>ribosomal protein S14 (chr18)</b>                  |
| <b>Rps14</b>                       | <b>NM_022672</b>          | <b>10871997</b> | <b>0.69</b> | <b>-404</b> | <b>76.7</b> | <b>ylw</b>  | <b>ribosomal protein S14 (chr5)</b>                   |
| <b>Rps14</b>                       | <b>ENSRNOT00000059501</b> | <b>10927281</b> | <b>0.68</b> | <b>-359</b> | <b>72.2</b> | <b>ylw</b>  | <b>ribosomal protein S14 (chr9)</b>                   |
| Rps15a                             | NM_053982                 | 10725159        | 0.82        | -107        | 39.8        | ylw         | ribosomal protein S15a (chr1)                         |
| Rps15a                             | NM_053982                 | 10752146        | 0.83        | -103        | 41.8        | ylw         | ribosomal protein S15a (chr11)                        |
| Rps15a                             | NM_053982                 | 10760208        | 0.78        | -119        | 40.9        | ylw         | ribosomal protein S15a (chr12)                        |
| <b>Rps17</b>                       | <b>NM_017152</b>          | <b>10723233</b> | <b>0.68</b> | <b>-313</b> | <b>64.2</b> | <b>ylw</b>  | <b>ribosomal protein S17 (chr1)</b>                   |
| <b>Rps17</b>                       | <b>NM_017152</b>          | <b>10844946</b> | <b>0.69</b> | <b>-306</b> | <b>64.7</b> | <b>ylw</b>  | <b>ribosomal protein S17 (chr3)</b>                   |
| Rps18                              | NM_213557                 | 10749058        | 0.75        | -255        | 34.7        | ylw         | ribosomal protein S18 (chr10)                         |
| Rps18                              | NM_213557                 | 10828433        | 0.79        | -189        | 30.1        | ylw         | ribosomal protein S18 (chr20)                         |
| Rps18                              | NM_213557                 | 10870043        | 0.76        | -189        | 37.8        | ylw         | ribosomal protein S18 (chr5)                          |
| <b>Rps20</b>                       | <b>NM_001007603</b>       | <b>10876420</b> | <b>0.83</b> | <b>-484</b> | <b>61.7</b> | <b>ylw</b>  | <b>ribosomal protein S20</b>                          |
| <b>Rps24</b>                       | <b>NM_031112</b>          | <b>10746246</b> | <b>0.82</b> | <b>-38</b>  | <b>50.9</b> | <b>ylw</b>  | <b>ribosomal protein S24 (chr10)</b>                  |
| <b>Rps24</b>                       | <b>NM_031112</b>          | <b>10786132</b> | <b>0.83</b> | <b>-38</b>  | <b>48.0</b> | <b>ylw</b>  | <b>ribosomal protein S24 (chr16)</b>                  |
| Rps27                              | NM_053597                 | 10824596        | 0.72        | -15         | 26.0        | ylw         | ribosomal protein S27                                 |
| <b>Rps27a</b>                      | <b>NM_031113</b>          | <b>10778853</b> | <b>0.82</b> | <b>-322</b> | <b>63.4</b> | <b>ylw</b>  | <b>ribosomal protein S27a (chr14)</b>                 |
| <b>Rps27a</b>                      | <b>NM_031113</b>          | <b>10879392</b> | <b>0.80</b> | <b>-323</b> | <b>62.1</b> | <b>ylw</b>  | <b>ribosomal protein S27a (chr5)</b>                  |
| Rps3                               | NM_001009239              | 10723891        | 0.82        | -999        | 25.4        | ylw         | ribosomal protein S3                                  |
| <b>Rps7</b>                        | <b>NM_031570</b>          | <b>10785933</b> | <b>0.82</b> | <b>-434</b> | <b>61.0</b> | <b>ylw</b>  | <b>ribosomal protein S7 (chr15)</b>                   |
| <b>Rps7</b>                        | <b>NM_031570</b>          | <b>10881922</b> | <b>0.82</b> | <b>-350</b> | <b>64.2</b> | <b>ylw</b>  | <b>ribosomal protein S7 (chr5)</b>                    |
| <b>Rps7</b>                        | <b>NM_031570</b>          | <b>10889455</b> | <b>0.82</b> | <b>-358</b> | <b>66.9</b> | <b>ylw</b>  | <b>ribosomal protein S7 (chr6)</b>                    |
| Sf1                                | NM_001110793              | 10713362        | 1.39        | 69          | 17.8        | ylw         | splicing factor 1                                     |
| Sf3a1                              | NM_001107235              | 10773809        | 1.23        | 18          | 15.5        | turq        | splicing factor 3a, subunit 1                         |
| Sf3b5                              | NM_001126092              | 10701797        | 0.77        | -39         | 11.9        | ylw         | splicing factor 3b, subunit 5                         |
| Sfrs16                             | NM_001024294              | 10812086        | 1.27        | 11          | 0           | grey        | splicing factor, arginine/serine-rich 16              |
| Tfip11                             | NM_001008291              | 10809462        | 0.83        | -12         | 0           | grey        | tuftelin interacting protein 11                       |
| Thyn1                              | NM_001007661              | 10921175        | 0.82        | -22         | 20.7        | ylw         | thymocyte nuclear protein 1                           |
| Wdr18                              | NM_001039027              | 10900710        | 0.76        | -49         | 20.6        | brwn        | WD repeat domain 18                                   |
| <b>MISCELLANEOUS &amp; UNKNOWN</b> |                           |                 |             |             |             |             |                                                       |
| Depdc5                             | NM_001107229              | 10777832        | 1.23        | 23          | 8.0         | ylw         | DEP domain containing 5                               |
| <b>Fam108c1</b>                    | <b>NM_001100736</b>       | <b>10723413</b> | <b>1.21</b> | <b>22</b>   | <b>38.4</b> | <b>turq</b> | <b>family with sequence similarity 108, member C1</b> |
| Fam53c                             | ENSRNOT00000027499        | 10800913        | 1.21        | 21          | 11.1        | turq        | family with sequence similarity 53, member C          |
| Fam75a4                            | ENSRNOT00000047043        | 10796941        | 0.69        | -33         | 9.9         | brwn        | family with sequence similarity 75, member A4         |
| <b>Ints3</b>                       | <b>ENSRNOT00000020575</b> | <b>10824624</b> | <b>1.20</b> | <b>39</b>   | <b>40.7</b> | <b>turq</b> | <b>integrator complex subunit 3</b>                   |
| LOC100361529                       | ENSRNOT00000025317        | 10727493        | 1.32        | 25          | 5.7         | ylw         | RCG47324-like                                         |
| LOC100362601                       | ENSRNOT00000049011        | 10728593        | 0.77        | -17         | 0           | grey        | PBPC1BS-like                                          |
| LOC100363176                       | XM_002728834              | 10728981        | 0.82        | -10         | 12.8        | ylw         | mCG145114-like                                        |
| LOC681410                          | ENSRNOT00000061231        | 10793891        | 1.27        | 18          | 33.0        | turq        | hypothetical protein LOC681410                        |
| LOC688786                          | NM_001195245              | 10759636        | 0.77        | -67         | 6.0         | ylw         | similar to CG14483-PA                                 |
| R3hdm2                             | NM_001130557              | 10895888        | 1.41        | 50          | 6.7         | ylw         | R3H domain containing 2                               |
| RGD1304878                         | ENSRNOT00000006131        | 10892097        | 1.22        | 23          | 8.2         | turq        | similar to 2410024A21Rik protein                      |
| RGD1306576                         | NM_001106648              | 10876169        | 0.82        | -11         | 7.2         | brwn        | similar to hypothetical protein                       |
| RGD1307410                         | ENSRNOT00000038993        | 10749577        | 1.31        | 15          | 7.6         | turq        | similar to hypothetical protein FLJ31528              |
| RGD1307597                         | NM_001106744              | 10891203        | 1.26        | 89          | 5.7         | ylw         | similar to mKIAA0317 protein                          |
| RGD1308297                         | BC082039                  | 10785745        | 1.24        | 64          | 0           | grey        | similar to CG10084-PA                                 |
| RGD1311309                         | ENSRNOT00000003061        | 10772342        | 1.25        | 34          | 29.8        | ylw         | similar to 2510002A14Rik protein                      |
| RGD1559695                         | ENSRNOT00000040236        | 10904444        | 1.26        | 18          | 2.82        | green       | similar to FLJ43860 protein                           |
| RGD1566320                         | NM_001106520              | 10840415        | 0.73        | -36         | 40.6        | ylw         | RGD1566320                                            |
| <b>Spryd4</b>                      | <b>NM_001037765</b>       | <b>10899736</b> | <b>0.73</b> | <b>-46</b>  | <b>23.8</b> | <b>brwn</b> | <b>SPRY domain containing 4</b>                       |
| Tmem140                            | NM_001009709              | 10854482        | 1.33        | 39          | 27.4        | ylw         | transmembrane protein 140                             |
| Tmem177                            | NM_001037776              | 10767162        | 0.83        | -11         | 0.6         | brwn        | transmembrane protein 177                             |
| Tmem185b                           | NM_001191668              | 10763547        | 1.22        | 61          | 19.3        | turq        | transmembrane protein 185B                            |
| Tmem208                            | NM_001106179              | 10807211        | 0.81        | -31         | 21.1        | ylw         | transmembrane protein 208                             |
| Tmem223                            | NM_001191104              | 10713648        | 0.78        | -63         | 26.6        | ylw         | transmembrane protein 223                             |
| Tmem37                             | NM_139095                 | 10931159        | 1.29        | 18          | 2.0         | ylw         | transmembrane protein 37                              |
| Tmem39b                            | NM_001014192              | 10880047        | 1.26        | 18          | 0           | grey        | transmembrane protein 39b                             |
| Tmem60                             | NM_001191610              | 10860269        | 1.23        | 47          | 0           | grey        | transmembrane protein 60                              |
| Tmem9                              | NM_001105953              | 10764260        | 0.72        | -26         | 0           | grey        | transmembrane protein 9                               |
| Trim14                             | NM_001107934              | 10876594        | 1.65        | 23          | 1.0         | red         | tripartite motif-containing 14                        |
| Ttc38                              | NM_001130499              | 10898368        | 1.20        | 19          | 10.3        | turq        | tetratricopeptide repeat domain 38                    |
| Ttyh3                              | NM_001107124              | 10756931        | 1.39        | 22          | 4.2         | turq        | tweety homolog 3 (Drosophila)                         |
| Wdr91                              | NM_001127298              | 10861751        | 1.22        | 13          | 0           | grey        | WD repeat domain 91                                   |
| <b>EST's</b>                       |                           |                 |             |             |             |             |                                                       |
| RGD1306917                         | BC169127                  | 10797493        | 0.78        | -34         | 5.9         | ylw         | similar to RIKEN cDNA 2900010M23 (chr17)              |
| RGD1306917                         | BC169127                  | 10831825        | 0.79        | -29         | 4.3         | ylw         | similar to RIKEN cDNA 2900010M23 (chr20)              |

|            |                           |                 |             |             |             |              |                                          |
|------------|---------------------------|-----------------|-------------|-------------|-------------|--------------|------------------------------------------|
| RGD1359127 | ENSRNOT00000021939        | 10893896        | 0.82        | -10         | 31.3        | brwn         | similar to RIKEN cDNA 2310011J03         |
| RGD1563155 | NM_001134598              | 10936897        | 0.66        | -23         | 9.84        | green        | similar to RIKEN cDNA 1700054O13         |
| RGD1564406 | ENSRNOT00000047128        | 10938521        | 0.59        | -10         | 0           | grey         | similar to RIKEN cDNA 1700019M22         |
| RGD1566149 | NM_001109038              | 10745222        | 1.42        | 15          | 4.2         | turq         | similar to CDNA sequence BC017647        |
| RGD1566266 | NM_001177613              | 10758599        | 1.27        | 19          | 16.1        | turq         | similar to hypothetical protein FLJ21127 |
|            | NC_001665                 | 10930620        | 2.01        | 633         | 3.7         | mgnt         |                                          |
|            | NC_001665                 | 10930610        | 1.26        | 12          | 3.2         | mgnt         |                                          |
|            | <b>J01884</b>             | <b>10830454</b> | <b>0.47</b> | <b>-77</b>  | <b>46.4</b> | <b>ylw</b>   |                                          |
|            | GENSCAN00000028117        | 10845645        | 0.68        | -59         | 9.7         | ylw          |                                          |
|            | GENSCAN00000017343        | 10873814        | 1.34        | 17          | 5.1         | ylw          |                                          |
|            | FQ234631                  | 10894268        | 0.62        | -11         | 34.5        | ylw          | (chr7)                                   |
|            | FQ234631                  | 10918270        | 0.62        | -11         | 34.5        | ylw          | (chr8)                                   |
|            | <b>FQ233900</b>           | <b>10765040</b> | <b>0.57</b> | <b>-84</b>  | <b>44.2</b> | <b>ylw</b>   |                                          |
|            | <b>FQ229993</b>           | <b>10737194</b> | <b>0.60</b> | <b>-235</b> | <b>44.9</b> | <b>ylw</b>   |                                          |
|            | FQ226474                  | 10918820        | 0.67        | -262        | 28.7        | ylw          |                                          |
|            | FQ225819                  | 10717949        | 0.70        | -31         | 32.0        | ylw          | (chr1)                                   |
|            | FQ225819                  | 10863888        | 0.70        | -31         | 32.0        | ylw          | (chr4)                                   |
|            | <b>FQ223410</b>           | <b>10855185</b> | <b>0.56</b> | <b>-309</b> | <b>60.6</b> | <b>ylw</b>   |                                          |
|            | FQ220555                  | 10906590        | 0.70        | -58         | 14.4        | brwn         | (chr7)                                   |
|            | FQ220555                  | 10940411        | 0.78        | -38         | 14.6        | brwn         | (chrX)                                   |
|            | FQ217715                  | 10702192        | 0.72        | -26         | 13.1        | ylw          | (chr1)                                   |
|            | FQ217715                  | 10739209        | 0.72        | -26         | 13.1        | ylw          | (chr10)                                  |
|            | FQ217715                  | 10788077        | 0.72        | -26         | 13.1        | ylw          | (chr16)                                  |
|            | FQ217715                  | 10863402        | 0.72        | -26         | 13.1        | ylw          | (chr4)                                   |
|            | FQ217715                  | 10885957        | 0.72        | -26         | 13.1        | ylw          | (chr6)                                   |
|            | FQ217715                  | 10922249        | 0.72        | -26         | 13.1        | ylw          | (chr9)                                   |
|            | FQ217715                  | 10937321        | 0.72        | -26         | 13.1        | ylw          | (chrX)                                   |
|            | FQ212372                  | 10891830        | 0.81        | -37         | 8.1         | ylw          | (chr6)                                   |
|            | ENSRNOT00000069734        | 10911811        | 0.44        | -39         | 4.0         | ylw          |                                          |
|            | ENSRNOT00000069363        | 10861115        | 0.73        | -17         | 4.3         | ylw          |                                          |
|            | ENSRNOT00000069284        | 10714056        | 0.70        | -13         | 2.0         | ylw          |                                          |
|            | ENSRNOT00000061400        | 10936358        | 1.86        | 11          | 0           | grey         |                                          |
|            | ENSRNOT00000060756        | 10915778        | 1.42        | 16          | 3.7         | blue         |                                          |
|            | ENSRNOT00000060122        | 10884046        | 0.73        | -32         | 6.0         | ylw          |                                          |
|            | ENSRNOT00000059111        | 10784523        | 1.34        | 39          | 7.4         | ylw          |                                          |
|            | ENSRNOT00000058749        | 10795719        | 0.66        | -14         | 0           | grey         |                                          |
|            | ENSRNOT00000057365        | 10924441        | 0.74        | -108        | 20.6        | brwn         |                                          |
|            | ENSRNOT00000056936        | 10878924        | 1.66        | 21          | 16.2        | ylw          |                                          |
|            | ENSRNOT00000056621        | 10935626        | 0.78        | -11         | 0           | grey         |                                          |
|            | ENSRNOT00000056335        | 10864908        | 0.82        | -11         | 5.1         | ylw          |                                          |
|            | ENSRNOT00000055058        | 10842742        | 1.27        | 29          | 2.3         | turq         |                                          |
|            | ENSRNOT00000054517        | 10797013        | 0.60        | -72         | 36.8        | ylw          | (chr17)                                  |
|            | ENSRNOT00000054517        | 10932228        | 0.60        | -72         | 36.8        | ylw          | (chrX)                                   |
|            | ENSRNOT00000054178        | 10914316        | 0.60        | -35         | 30.2        | ylw          |                                          |
|            | ENSRNOT00000054147        | 10713602        | 0.74        | -103        | 14.5        | ylw          |                                          |
|            | ENSRNOT00000054140        | 10783318        | 0.72        | -31         | 37.2        | ylw          |                                          |
|            | ENSRNOT00000053987        | 10755127        | 0.81        | -23         | 0           | grey         |                                          |
|            | ENSRNOT00000053974        | 10722461        | 0.55        | -42         | 5.2         | black        |                                          |
|            | ENSRNOT00000053951        | 10703224        | 0.62        | -50         | 26.3        | ylw          |                                          |
|            | ENSRNOT00000053936        | 10722443        | 0.67        | -20         | 0.9         | black        |                                          |
|            | ENSRNOT00000053934        | 10722465        | 0.58        | -20         | 2.8         | black        |                                          |
|            | <b>ENSRNOT00000053919</b> | <b>10755129</b> | <b>0.65</b> | <b>-340</b> | <b>48.8</b> | <b>ylw</b>   |                                          |
|            | ENSRNOT00000053909        | 10766795        | 0.64        | -16         | 6.0         | ylw          |                                          |
|            | ENSRNOT00000053902        | 10827450        | 0.63        | -692        | 7.1         | ylw          |                                          |
|            | <b>ENSRNOT00000053882</b> | <b>10722421</b> | <b>0.57</b> | <b>-89</b>  | <b>12.7</b> | <b>black</b> |                                          |
|            | ENSRNOT00000053855        | 10722481        | 0.56        | -39         | 7.3         | black        |                                          |
|            | ENSRNOT00000053847        | 10767075        | 0.70        | -112        | 26.0        | ylw          |                                          |
|            | <b>ENSRNOT00000053552</b> | <b>10713608</b> | <b>0.64</b> | <b>-132</b> | <b>60.6</b> | <b>ylw</b>   |                                          |
|            | ENSRNOT00000053542        | 10871771        | 0.59        | -101        | 36.3        | ylw          |                                          |
|            | ENSRNOT00000053479        | 10851380        | 0.54        | -34         | 39.9        | ylw          |                                          |
|            | ENSRNOT00000053476        | 10702293        | 0.65        | -30         | 31.2        | ylw          |                                          |
|            | ENSRNOT00000053459        | 10765038        | 0.65        | -23         | 5.6         | ylw          |                                          |
|            | ENSRNOT00000053447        | 10765495        | 0.62        | -34         | 42.8        | ylw          |                                          |
|            | ENSRNOT00000053408        | 10918383        | 0.63        | -59         | 16.7        | ylw          |                                          |
|            | ENSRNOT00000053402        | 10721698        | 0.58        | -626        | 42.0        | ylw          |                                          |
|            | ENSRNOT00000053328        | 10855946        | 0.59        | -141        | 28.7        | ylw          |                                          |
|            | ENSRNOT00000053325        | 10711125        | 0.74        | -25         | 9.9         | ylw          |                                          |
|            | ENSRNOT00000053296        | 10805849        | 0.60        | -14         | 13.2        | ylw          |                                          |
|            | ENSRNOT00000053279        | 10708691        | 0.67        | -443        | 35.6        | ylw          |                                          |

|  |                           |                 |             |             |             |              |        |
|--|---------------------------|-----------------|-------------|-------------|-------------|--------------|--------|
|  | <b>ENSRNOT00000053230</b> | <b>10758033</b> | <b>0.53</b> | <b>-116</b> | <b>44.5</b> | <b>ylw</b>   |        |
|  | ENSRNOT00000053208        | 10774100        | 0.74        | -33         | 32.9        | ylw          |        |
|  | ENSRNOT00000053184        | 10722429        | 0.66        | -18         | 4.4         | black        |        |
|  | ENSRNOT00000053117        | 10722433        | 0.53        | -42         | 3.3         | black        |        |
|  | ENSRNOT00000053105        | 10881643        | 0.64        | -31         | 11.2        | ylw          |        |
|  | ENSRNOT00000053019        | 10722451        | 0.57        | -18         | 5.6         | black        |        |
|  | ENSRNOT00000052995        | 10723898        | 0.55        | -73         | 39.5        | ylw          |        |
|  | ENSRNOT00000052978        | 10721700        | 0.57        | -90         | 38.5        | ylw          |        |
|  | ENSRNOT00000052964        | 10801135        | 0.58        | -731        | 23.9        | ylw          |        |
|  | ENSRNOT00000052956        | 10755131        | 0.78        | -16         | 16.3        | ylw          |        |
|  | <b>ENSRNOT00000052947</b> | <b>10826602</b> | <b>0.57</b> | <b>-114</b> | <b>56.8</b> | <b>ylw</b>   |        |
|  | ENSRNOT00000052871        | 10709784        | 0.69        | -28         | 19.8        | ylw          |        |
|  | ENSRNOT00000052797        | 10828158        | 0.69        | -16         | 28.8        | ylw          |        |
|  | ENSRNOT00000052790        | 10831150        | 0.69        | -14         | 40.2        | ylw          |        |
|  | ENSRNOT00000052727        | 10910764        | 0.58        | -77         | 33.5        | ylw          |        |
|  | ENSRNOT00000052710        | 10838282        | 0.62        | -121        | 32.8        | ylw          | (chr3) |
|  | ENSRNOT00000052710        | 10924172        | 0.62        | -121        | 32.8        | ylw          | (chr9) |
|  | ENSRNOT00000052689        | 10896964        | 0.63        | -33         | 13.4        | ylw          |        |
|  | ENSRNOT00000052661        | 10722437        | 0.63        | -29         | 9.8         | black        |        |
|  | <b>ENSRNOT00000052632</b> | <b>10846928</b> | <b>0.58</b> | <b>-299</b> | <b>55.6</b> | <b>ylw</b>   | (chr3) |
|  | <b>ENSRNOT00000052632</b> | <b>10871769</b> | <b>0.58</b> | <b>-351</b> | <b>53.8</b> | <b>ylw</b>   | (chr5) |
|  | <b>ENSRNOT00000052628</b> | <b>10834602</b> | <b>0.60</b> | <b>-201</b> | <b>47.8</b> | <b>ylw</b>   |        |
|  | ENSRNOT00000052625        | 10873578        | 0.67        | -12         | 13.0        | ylw          |        |
|  | ENSRNOT00000052571        | 10790465        | 0.74        | -14         | 1.3         | blue         |        |
|  | <b>ENSRNOT00000052564</b> | <b>10722431</b> | <b>0.58</b> | <b>-93</b>  | <b>11.2</b> | <b>black</b> |        |
|  | ENSRNOT00000052542        | 10871415        | 0.62        | -15         | 0           | grey         |        |
|  | ENSRNOT00000052507        | 10722471        | 0.67        | -25         | 8.1         | black        |        |
|  | <b>ENSRNOT00000052442</b> | <b>10709825</b> | <b>0.56</b> | <b>-256</b> | <b>57.6</b> | <b>ylw</b>   |        |
|  | ENSRNOT00000051889        | 10787722        | 0.79        | -24         | 0           | grey         |        |
|  | <b>ENSRNOT00000049614</b> | <b>10736693</b> | <b>0.73</b> | <b>-26</b>  | <b>59.3</b> | <b>ylw</b>   |        |
|  | ENSRNOT00000048926        | 10889421        | 1.41        | 17          | 0.6         | blue         |        |
|  | <b>ENSRNOT00000048141</b> | <b>10839058</b> | <b>1.32</b> | <b>13</b>   | <b>21.6</b> | <b>brwn</b>  |        |
|  | ENSRNOT00000048078        | 10801778        | 1.41        | 26          | 5.8         | blue         |        |
|  | ENSRNOT00000043131        | 10774908        | 0.78        | -22         | 0           | grey         |        |
|  | ENSRNOT00000041344        | 10785800        | 0.70        | -28         | 8.1         | ylw          |        |
|  | ENSRNOT00000039311        | 10789806        | 1.22        | 22          | 3.2         | brwn         |        |
|  | ENSRNOT00000036778        | 10849861        | 0.76        | -41         | 0           | grey         |        |
|  | ENSRNOT00000036340        | 10781280        | 0.72        | -84         | 28.9        | ylw          |        |
|  | ENSRNOT00000035374        | 10850519        | 0.76        | -20         | 0           | grey         |        |
|  | ENSRNOT00000031816        | 10894159        | 0.76        | -28         | 0           | grey         |        |
|  | ENSRNOT00000031737        | 10811706        | 1.36        | 58          | 2.7         | ylw          |        |
|  | ENSRNOT00000030857        | 10859792        | 0.72        | -26         | 0           | grey         |        |
|  | ENSRNOT00000030293        | 10718408        | 0.76        | -30         | 9.0         | ylw          |        |
|  | ENSRNOT00000025375        | 10802373        | 0.83        | -40         | 4.3         | brwn         |        |
|  | ENSRNOT00000018963        | 10814892        | 0.73        | -36         | 30.5        | ylw          |        |
|  | ENSRNOT00000017777        | 10792049        | 0.69        | -63         | 18.7        | ylw          |        |
|  | ENSRNOT00000016461        | 10722816        | 0.71        | -21         | 13.1        | ylw          |        |
|  | ENSRNOT00000016409        | 10890853        | 0.63        | -10         | 7.6         | ylw          |        |
|  | ENSRNOT00000013808        | 10886597        | 0.81        | -11         | 0.3         | turq         |        |
|  | ENSRNOT00000013307        | 10784444        | 0.81        | -12         | 5.2         | brwn         |        |
|  | ENSRNOT00000006999        | 10939166        | 0.74        | -13         | 3.7         | ylw          |        |
|  | ENSRNOT00000004332        | 10768301        | 0.77        | -181        | 42.4        | ylw          |        |
|  | ENSRNOT00000003899        | 10934526        | 0.76        | -14         | 0           | grey         |        |
|  | ENSRNOT00000001661        | 10760580        | 1.21        | 11          | 2.4         | turq         |        |
|  | ENSRNOT00000001562        | 10762723        | 1.28        | 73          | 32.5        | turq         |        |
|  | ENSRNOT00000001469        | 10760483        | 1.27        | 16          | 5.8         | turq         |        |
|  | ENSRNOT00000001338        | 10761553        | 1.21        | 87          | 1.4         | ylw          |        |
|  | BC099108                  | 10746854        | 1.47        | 16          | 2.5         | ylw          |        |
|  | BC087666                  | 10891594        | 1.37        | 103         | 18.0        | ylw          |        |
|  | <b>AF272707</b>           | <b>10867318</b> | <b>0.60</b> | <b>-80</b>  | <b>48.6</b> | <b>ylw</b>   |        |
|  | ---                       | 10821115        | 0.78        | -45         | 13.3        | blue         |        |
|  | ---                       | 10868796        | 0.78        | -21         | 6.5         | blue         |        |
|  | ---                       | 10796230        | 1.53        | 14          | 6.8         | brwn         |        |
|  | ---                       | 10903259        | 0.83        | -26         | 0           | grey         |        |
|  | ---                       | 10791602        | 1.32        | 21          | 0           | grey         |        |
|  | ---                       | 10833416        | 1.32        | 21          | 0           | grey         |        |
|  | ---                       | 10812130        | 1.23        | 23          | 21.8        | turq         |        |
|  | ---                       | 10931663        | 0.76        | -21         | 5.7         | turq         |        |
|  | ---                       | 10771204        | 0.82        | -10         | 3.2         | ylw          |        |



|     |          |      |      |      |       |
|-----|----------|------|------|------|-------|
| --- | 10825510 | 1.41 | 41   | 1.6  | ylw   |
| --- | 10700166 | 1.46 | 31   | 0.4  | black |
| --- | 10700873 | 1.25 | 625  | 16.2 | blue  |
| --- | 10701572 | 1.71 | 37   | 11.9 | blue  |
| --- | 10701089 | 0.76 | -12  | 10.7 | blue  |
| --- | 10700930 | 1.24 | 81   | 6.9  | blue  |
| --- | 10701316 | 1.84 | 37   | 1.8  | blue  |
| --- | 10701352 | 0.73 | -10  | 8.4  | brwn  |
| --- | 10701196 | 0.71 | -11  | 3.6  | brwn  |
| --- | 10700331 | 0.60 | -41  | 0    | grey  |
| --- | 10700192 | 0.74 | -34  | 0    | grey  |
| --- | 10700239 | 0.58 | -31  | 0    | grey  |
| --- | 10701598 | 0.70 | -23  | 0    | grey  |
| --- | 10701547 | 0.51 | -21  | 0    | grey  |
| --- | 10700874 | 0.70 | -17  | 0    | grey  |
| --- | 10701169 | 0.55 | -16  | 0    | grey  |
| --- | 10700194 | 0.62 | -15  | 0    | grey  |
| --- | 10701447 | 1.25 | 10   | 0    | grey  |
| --- | 10700552 | 1.58 | 12   | 0    | grey  |
| --- | 10700098 | 1.43 | 13   | 0    | grey  |
| --- | 10700203 | 1.54 | 13   | 0    | grey  |
| --- | 10700337 | 1.86 | 14   | 0    | grey  |
| --- | 10701588 | 1.27 | 15   | 0    | grey  |
| --- | 10701277 | 1.54 | 16   | 0    | grey  |
| --- | 10700605 | 1.33 | 16   | 0    | grey  |
| --- | 10701373 | 1.31 | 17   | 0    | grey  |
| --- | 10701463 | 1.73 | 19   | 0    | grey  |
| --- | 10700443 | 1.64 | 22   | 0    | grey  |
| --- | 10700424 | 1.57 | 31   | 0    | grey  |
| --- | 10700479 | 1.28 | 113  | 0    | grey  |
| --- | 10701009 | 1.60 | 80   | 0.4  | pink  |
| --- | 10700438 | 0.77 | -49  | 21.3 | turq  |
| --- | 10700304 | 1.32 | 689  | 13.9 | turq  |
| --- | 10701325 | 0.60 | -25  | 2.9  | turq  |
| --- | 10700274 | 0.78 | -242 | 34.8 | ylw   |
| --- | 10700266 | 1.26 | 23   | 9.0  | ylw   |
| --- | 10700409 | 0.73 | -74  | 8.6  | ylw   |
| --- | 10701067 | 1.64 | 21   | 3.8  | ylw   |
| --- | 10700215 | 0.58 | -20  | 0.8  | ylw   |

k.in is interconnection index calculated for each gene in a given module.

Top 10% genes of each male or female module with highest k.in value are marked by bold font.

Modules color abbreviaton: brwn - brown, turq - turquoise, l-grn - lightgreen, l-cn - lightcyan, l-ye - lightyellow, mgnt - magenta, gr-yel - greenyellow, ylw - yellow, m-blu - midnightblue, gr60 - grey60 (not in module).
