# Supplementary material for: Epigenetic transgenerational inheritance of somatic transcriptomes and epigenetic control regions
Source: PubMed Central journal article supplement (PMC3491419; doi:10.1186/gb-2012-13-10-r91), 2012-10-03
Supplement: gb-2012-13-10-r91-S6.pdf [file gb-2012-13-10-r91-S6.pdf]

Supplemental Table S2

## Pathway Enrichment for 11 Male and Female Rat Tissue Signature Lists

| Pathway name                                | Sex.Tissue             |                |         |          |         |         |      |          |               |         |          |         |         |          |
|---------------------------------------------|------------------------|----------------|---------|----------|---------|---------|------|----------|---------------|---------|----------|---------|---------|----------|
|                                             | 11 Male & fem. Tissues | Male 6 tissues | M.Heart | M.Kidney | M.Liver | M.Prost | M.SV | M.Testis | Fem 5 tissues | F.Heart | F.Kidney | F.Liver | F.Ovary | F.Uterus |
| Number of genes in input list               | 4059                   | 3046           | 172     | 725      | 266     | 1112    | 274  | 552      | 1298          | 408     | 151      | 99      | 305     | 279      |
| Total Number of Affected Pathways           | 230                    | 224            | 79      | 151      | 141     | 191     | 90   | 99       | 191           | 108     | 79       | 29      | 80      | 138      |
| Pathways in cancer                          | 45                     | 32             | 3       | 7        | 6       | 13      | 1    | 2        | 17            | 6       | 3        | 1       | 3       | 4        |
| Protein processing in endoplasmic reticulum | 39                     | 38             | 3       | 4        | 1       | 22      | 5    | 4        | 3             | 1       |          |         | 1       | 1        |
| HTLV-I infection                            | 39                     | 31             |         | 8        | 3       | 14      | 3    | 2        | 10            | 4       | 2        |         | 1       | 3        |
| RNA transport                               | 39                     | 31             | 1       | 8        |         | 17      | 3    | 6        | 11            | 4       |          | 1       | 2       | 4        |
| Transcriptional misregulation in cancers    | 31                     | 26             | 1       | 8        | 6       | 7       | 4    | 3        | 12            | 6       | 3        | 1       |         | 3        |
| Herpes simplex infection                    | 30                     | 23             | 2       | 10       | 3       | 7       | 2    | 1        | 9             | 3       | 1        |         | 2       | 3        |
| Lysosome                                    | 29                     | 27             | 1       | 5        | 4       | 16      | 2    | 2        | 5             | 1       |          |         | 1       | 3        |
| Ribosome                                    | 29                     | 27             | 2       | 5        |         | 1       |      | 20       | 4             | 1       | 1        | 2       |         |          |
| Endocytosis                                 | 29                     | 26             | 1       | 4        | 8       | 11      | 1    | 3        | 5             | 2       |          |         |         | 3        |
| Phagosome                                   | 28                     | 27             | 1       | 6        | 6       | 12      |      | 2        | 7             |         | 3        |         |         | 4        |
| MAPK signaling pathway                      | 28                     | 21             | 1       | 7        | 3       | 7       | 1    | 2        | 8             | 3       |          |         | 1       | 4        |
| Spliceosome                                 | 27                     | 17             |         | 8        | 1       | 1       | 2    | 7        | 12            | 6       | 1        |         | 1       | 5        |
| Regulation of actin cytoskeleton            | 26                     | 24             | 1       | 6        | 6       | 9       |      | 3        | 5             | 3       |          | 1       |         | 1        |
| Alzheimer's disease                         | 26                     | 22             | 2       | 4        |         | 7       |      | 10       | 5             |         |          |         | 2       | 3        |
| Huntington's disease                        | 26                     | 22             | 1       | 6        |         | 2       |      | 14       | 5             | 1       |          | 1       | 2       | 1        |
| Purine metabolism                           | 26                     | 22             | 1       | 6        | 2       | 4       | 2    | 6        | 7             | 2       |          |         |         | 5        |
| Focal adhesion                              | 26                     | 21             | 2       | 2        | 7       | 8       |      | 3        | 9             | 3       |          | 2       |         | 4        |
| Chemokine signaling pathway                 | 24                     | 23             | 3       | 4        | 6       | 9       | 1    | 1        | 4             |         |          |         | 2       | 2        |
| Pyrimidine metabolism                       | 24                     | 20             | 1       | 6        | 1       | 6       | 1    | 5        | 6             | 1       |          | 1       | 1       | 3        |
| Tuberculosis                                | 24                     | 20             |         | 6        | 6       | 9       | 1    |          | 9             | 1       | 1        |         |         | 7        |
| Influenza A                                 | 23                     | 21             | 1       | 5        | 2       | 11      | 1    | 3        | 5             | 1       | 2        |         |         | 2        |
| Oxidative phosphorylation                   | 23                     | 20             | 1       | 4        |         | 5       |      | 11       | 5             |         | 1        |         | 1       | 3        |
| Leukocyte transendothelial migration        | 22                     | 18             | 2       | 1        | 7       | 8       |      | 1        | 6             | 4       | 1        |         |         | 1        |
| Cytokine-cytokine receptor interaction      | 21                     | 19             | 1       | 6        | 7       | 6       |      |          | 4             | 3       |          |         |         | 1        |
| Osteoclast differentiation                  | 21                     | 18             | 1       | 2        | 6       | 10      | 1    |          | 5             | 1       |          |         | 1       | 3        |
| Cell adhesion molecules (CAMs)              | 20                     | 14             | 2       | 3        | 4       | 6       | 1    |          | 7             | 3       | 1        |         | 1       | 2        |
| Insulin signaling pathway                   | 19                     | 13             |         | 2        | 3       | 6       | 2    |          | 6             | 2       |          |         |         | 4        |
| mRNA surveillance pathway                   | 19                     | 13             | 1       | 4        |         | 5       | 2    | 4        | 8             | 4       |          |         | 2       | 2        |

|                                                        |    |    |   |   |   |    |   |   |   |   |   |   |   |   |
|--------------------------------------------------------|----|----|---|---|---|----|---|---|---|---|---|---|---|---|
| Ribosome biogenesis in eukaryotes                      | 19 | 13 |   | 4 | 1 | 6  |   | 4 | 7 | 1 |   | 1 | 5 |   |
| Wnt signaling pathway                                  | 18 | 14 | 1 | 3 | 2 | 6  | 1 | 1 | 4 | 2 |   |   |   | 2 |
| Neuroactive ligand-receptor interaction                | 18 | 12 | 1 |   | 3 | 6  | 1 | 1 | 7 | 3 | 3 |   |   | 2 |
| RNA degradation                                        | 18 | 12 | 1 | 2 |   | 4  | 2 | 4 | 7 | 1 | 1 |   | 2 | 4 |
| Tight junction                                         | 18 | 12 | 1 | 2 | 2 | 6  |   | 1 | 9 | 6 |   |   | 1 | 2 |
| Calcium signaling pathway                              | 17 | 16 | 1 | 4 | 3 | 7  |   |   | 4 | 2 | 1 |   |   | 1 |
| Parkinson's disease                                    | 17 | 15 | 1 | 3 |   | 3  |   | 9 | 2 |   |   |   | 1 | 1 |
| Ubiquitin mediated proteolysis                         | 17 | 12 |   |   |   | 12 | 1 |   | 7 | 3 | 1 |   | 1 | 2 |
| Measles                                                | 16 | 16 |   | 3 | 3 | 8  | 1 |   | 4 | 2 |   |   |   | 2 |
| Hepatitis C                                            | 16 | 11 |   | 1 | 2 | 7  | 1 |   | 6 | 1 |   |   | 2 | 3 |
| Cell cycle                                             | 16 | 10 |   | 2 |   | 9  | 1 |   | 4 | 1 |   |   | 2 | 1 |
| Phosphatidylinositol signaling system                  | 16 | 10 |   | 1 | 3 | 6  |   | 2 | 5 | 3 |   |   | 1 | 1 |
| Fc gamma R-mediated phagocytosis                       | 15 | 16 | 1 | 1 | 5 | 9  |   | 1 |   |   |   |   |   |   |
| Natural killer cell mediated cytotoxicity              | 15 | 14 | 1 | 2 | 6 | 4  |   | 1 | 4 | 1 | 1 |   |   | 2 |
| Systemic lupus erythematosus                           | 15 | 14 |   | 6 | 2 | 3  | 1 | 2 | 3 | 1 | 2 |   |   | 1 |
| Dopaminergic synapse                                   | 15 | 12 | 1 | 2 | 2 | 6  | 1 |   | 3 | 1 |   |   | 1 | 1 |
| Antigen processing and presentation                    | 15 | 11 | 1 | 4 | 2 | 2  | 1 | 1 | 4 | 1 | 1 |   |   | 2 |
| Small cell lung cancer                                 | 15 | 11 | 1 | 1 | 2 | 5  | 1 | 1 | 5 |   | 1 | 1 | 1 | 2 |
| Apoptosis                                              | 15 | 10 |   | 2 | 2 | 5  | 1 |   | 8 | 2 | 2 |   | 1 | 3 |
| Toxoplasmosis                                          | 15 | 10 |   | 2 | 2 | 6  | 1 |   | 6 |   | 2 |   | 1 | 3 |
| Rheumatoid arthritis                                   | 14 | 12 | 1 | 1 | 3 | 5  |   | 1 | 5 | 1 | 1 |   |   | 3 |
| Arrhythmogenic right ventricular cardiomyopathy (ARVC) | 14 | 11 |   | 5 | 1 | 5  |   |   | 3 | 2 |   |   |   | 1 |
| Jak-STAT signaling pathway                             | 14 | 11 |   | 2 | 3 | 5  | 1 |   | 3 | 2 | 1 |   |   |   |
| Chagas disease (American trypanosomiasis)              | 14 | 10 |   | 3 | 3 | 3  | 1 |   | 5 |   | 1 |   | 1 | 4 |
| Inositol phosphate metabolism                          | 14 | 9  |   | 1 | 1 | 4  |   | 4 | 4 | 2 |   |   | 1 | 1 |
| Serotonergic synapse                                   | 14 | 8  | 2 | 2 | 1 | 3  |   |   | 6 | 1 | 2 |   | 1 | 3 |
| N-Glycan biosynthesis                                  | 13 | 13 | 1 | 1 |   | 11 | 1 | 1 |   |   |   |   |   |   |
| Dilated cardiomyopathy (DCM)                           | 13 | 12 |   | 7 |   | 3  |   |   | 4 | 2 | 1 |   |   | 1 |
| Adherens junction                                      | 13 | 11 |   |   | 2 | 9  |   |   | 5 | 3 |   |   |   | 2 |
| Glycerophospholipid metabolism                         | 13 | 11 | 2 | 2 | 2 | 3  | 1 | 3 | 3 | 1 |   |   |   | 2 |
| T cell receptor signaling pathway                      | 13 | 10 | 1 |   | 4 | 4  | 1 | 1 | 5 | 1 |   |   | 1 | 3 |
| Complement and coagulation cascades                    | 13 | 8  |   | 3 | 1 | 1  | 2 | 2 | 4 | 2 | 1 |   |   | 2 |
| Protein digestion and absorption                       | 13 | 8  |   | 3 | 1 | 4  |   |   | 5 |   | 2 | 2 |   | 1 |
| Adipocytokine signaling pathway                        | 13 | 6  |   |   | 1 | 4  | 1 |   | 9 | 1 | 1 |   | 3 | 4 |
| Hematopoietic cell lineage                             | 12 | 12 | 1 | 2 | 5 | 5  |   |   | 4 | 1 | 1 |   |   | 2 |
| Synaptic vesicle cycle                                 | 12 | 12 |   |   | 1 | 10 |   | 1 | 2 |   |   |   |   | 2 |
| Aminoacyl-tRNA biosynthesis                            | 12 | 11 |   | 1 |   | 5  | 7 |   | 2 |   |   |   | 1 | 2 |
| Amoebiasis                                             | 12 | 11 | 1 | 3 | 1 | 4  | 1 |   | 3 |   |   | 1 |   | 2 |
| Pertussis                                              | 12 | 11 |   | 3 | 3 | 3  | 1 | 1 | 3 |   | 2 |   |   | 2 |
| Salmonella infection                                   | 12 | 11 |   | 4 | 1 | 4  | 2 |   | 3 |   | 1 | 1 |   | 1 |
| Toll-like receptor signaling pathway                   | 12 | 11 | 1 | 3 | 2 | 4  | 1 |   | 2 |   |   |   | 1 | 1 |
| Axon guidance                                          | 12 | 10 | 1 |   | 3 | 5  |   | 3 | 3 | 1 |   | 1 |   | 1 |
| Bacterial invasion of epithelial cells                 | 12 | 10 | 1 | 1 | 1 | 6  | 1 | 1 | 3 | 2 |   |   |   | 1 |

|                                                           |    |    |   |   |   |   |   |   |   |   |   |   |   |   |
|-----------------------------------------------------------|----|----|---|---|---|---|---|---|---|---|---|---|---|---|
| Viral myocarditis                                         | 12 | 10 |   | 3 | 2 | 4 |   |   | 4 | 1 | 1 | 1 |   | 1 |
| Cardiac muscle contraction                                | 12 | 9  | 1 | 4 | 1 | 1 |   | 2 | 4 | 1 | 2 |   |   | 1 |
| Vascular smooth muscle contraction                        | 12 | 9  | 1 | 3 | 2 | 1 |   | 1 | 5 | 2 | 1 |   |   | 2 |
| ECM-receptor interaction                                  | 12 | 8  | 1 | 2 | 2 | 3 | 1 |   | 5 |   | 2 | 2 |   | 1 |
| Hypertrophic cardiomyopathy (HCM)                         | 12 | 8  |   | 6 |   | 2 |   |   | 5 | 2 | 1 |   |   | 2 |
| GnRH signaling pathway                                    | 11 | 11 | 2 | 4 | 1 | 3 |   |   | 2 |   |   |   |   | 2 |
| Neurotrophin signaling pathway                            | 11 | 11 | 1 | 1 | 3 | 6 | 1 |   | 1 |   |   |   |   | 1 |
| Circadian rhythm - mammal                                 | 11 | 9  | 1 |   | 2 | 3 | 4 |   | 5 | 3 |   |   |   | 2 |
| Cytosolic DNA-sensing pathway                             | 11 | 9  |   | 3 | 1 | 3 | 1 | 1 | 4 |   | 1 |   | 1 | 2 |
| Mineral absorption                                        | 11 | 9  |   | 5 | 1 | 2 | 1 |   | 3 | 1 | 1 |   | 1 |   |
| Progesterone-mediated oocyte maturation                   | 11 | 9  |   | 1 | 1 | 5 | 2 |   | 2 |   |   |   |   | 2 |
| Staphylococcus aureus infection                           | 11 | 9  |   | 4 | 2 | 2 | 1 |   | 3 | 1 | 2 |   |   | 1 |
| Chronic myeloid leukemia                                  | 11 | 7  |   |   | 1 | 5 | 1 |   | 5 | 1 | 2 |   | 1 | 1 |
| p53 signaling pathway                                     | 11 | 7  |   | 1 |   | 5 | 4 |   | 2 | 1 |   |   |   | 1 |
| PPAR signaling pathway                                    | 11 | 5  |   | 1 | 2 | 2 | 1 |   | 8 |   | 1 | 2 | 1 | 4 |
| B cell receptor signaling pathway                         | 10 | 10 |   |   | 3 | 4 | 1 | 1 | 2 |   |   |   | 1 | 1 |
| Leishmaniasis                                             | 10 | 10 |   | 3 | 2 | 4 | 1 |   | 2 |   | 1 |   |   | 1 |
| Bile secretion                                            | 10 | 9  | 1 | 2 | 1 | 4 |   |   | 2 |   | 1 |   | 1 |   |
| Oocyte meiosis                                            | 10 | 9  | 1 | 1 | 1 | 5 |   |   | 2 |   |   |   | 1 | 1 |
| Acute myeloid leukemia                                    | 10 | 8  |   | 1 | 2 | 4 | 1 |   | 3 |   | 1 |   | 1 | 1 |
| Cholinergic synapse                                       | 10 | 8  |   | 2 | 3 | 2 |   |   | 4 | 1 |   |   | 1 | 2 |
| mTOR signaling pathway                                    | 10 | 8  | 2 | 1 | 1 | 4 |   |   | 3 | 2 |   |   |   | 1 |
| Porphyrin and chlorophyll metabolism                      | 10 | 8  |   | 4 | 2 |   | 1 | 1 | 3 | 1 | 1 | 1 | 1 |   |
| Prostate cancer                                           | 10 | 8  | 1 |   | 2 | 4 | 1 |   | 3 | 1 |   |   | 1 | 1 |
| Pancreatic cancer                                         | 10 | 7  | 1 |   | 2 | 3 | 1 |   | 5 | 2 | 1 |   | 1 | 1 |
| Basal transcription factors                               | 10 | 6  | 2 | 1 | 1 | 1 | 1 |   | 4 | 1 |   | 1 | 2 |   |
| Drug metabolism - other enzymes                           | 10 | 5  |   | 3 | 1 | 1 |   |   | 5 | 3 |   |   | 2 |   |
| Malaria                                                   | 10 | 5  | 1 |   | 4 |   | 1 |   | 7 |   | 3 |   | 4 | 3 |
| Fc epsilon RI signaling pathway                           | 9  | 10 | 1 |   | 5 | 3 |   |   | 1 |   |   |   |   | 1 |
| Gap junction                                              | 9  | 10 | 1 | 2 | 3 | 3 |   |   | 1 |   |   |   |   | 1 |
| Endocrine and other factor-regulated calcium reabsorption | 9  | 9  |   | 4 | 2 | 2 |   |   | 1 |   | 1 |   |   |   |
| Salivary secretion                                        | 9  | 9  |   | 1 | 3 | 4 | 1 |   | 2 | 1 | 1 |   |   |   |
| GABAergic synapse                                         | 9  | 8  |   | 2 |   | 3 | 1 | 1 | 3 |   |   |   | 1 | 2 |
| RNA polymerase                                            | 9  | 8  |   | 4 |   | 1 |   | 3 | 2 |   |   |   |   | 2 |
| VEGF signaling pathway                                    | 9  | 8  |   |   | 2 | 5 |   | 2 | 2 | 1 |   |   |   | 1 |
| Glutamatergic synapse                                     | 9  | 7  |   | 2 |   | 2 | 1 | 1 | 3 | 1 |   |   | 1 | 1 |
| Legionellosis                                             | 9  | 7  |   | 2 |   | 3 | 2 |   | 4 |   | 1 |   | 1 | 2 |
| Prion diseases                                            | 9  | 7  |   | 2 | 3 |   | 2 |   | 3 |   | 1 | 1 |   | 2 |
| TGF-beta signaling pathway                                | 9  | 6  | 1 | 1 | 3 | 1 |   |   | 4 | 2 |   |   | 2 |   |
| Cysteine and methionine metabolism                        | 9  | 5  |   | 3 | 1 | 1 |   |   | 4 | 1 |   |   | 1 | 2 |
| Renal cell carcinoma                                      | 9  | 5  | 1 |   | 1 | 3 |   |   | 5 | 2 | 1 |   | 1 | 1 |
| Glutathione metabolism                                    | 8  | 8  |   | 2 |   | 3 | 2 | 2 | 1 |   |   |   |   | 1 |
| Proteasome                                                | 8  | 8  |   | 3 |   | 3 |   | 3 |   |   |   |   |   |   |
| Amino sugar and nucleotide sugar metabolism               | 8  | 7  | 1 |   | 1 | 4 |   | 1 | 1 |   |   |   | 1 |   |
| Gastric acid secretion                                    | 8  | 7  |   | 1 | 2 | 2 | 1 |   | 2 |   | 2 |   |   |   |
| RIG-I-like receptor signaling pathway                     | 8  | 7  |   | 1 | 1 | 3 | 2 |   | 2 |   |   |   | 1 | 1 |
| Notch signaling pathway                                   | 8  | 6  | 1 |   |   | 4 |   | 1 | 3 | 2 |   |   | 1 |   |

|                                                       |   |   |   |   |   |   |   |   |   |   |   |   |   |   |
|-------------------------------------------------------|---|---|---|---|---|---|---|---|---|---|---|---|---|---|
| Valine, leucine and isoleucine degradation            | 8 | 6 |   | 1 |   |   |   | 5 | 2 |   |   |   |   | 2 |
| Endometrial cancer                                    | 8 | 5 |   |   | 1 | 4 |   |   | 3 | 3 |   |   |   |   |
| Glycosylphosphatidylinositol(GPI)-anchor biosynthesis | 8 | 4 |   |   |   | 3 |   | 1 | 4 | 1 |   | 1 | 1 | 1 |
| Protein export                                        | 7 | 8 | 1 |   |   | 3 | 2 | 1 |   |   |   |   |   |   |
| Butanoate metabolism                                  | 7 | 7 |   |   | 2 |   |   | 5 |   |   |   |   |   |   |
| Glioma                                                | 7 | 7 |   |   | 3 | 4 |   |   |   |   |   |   |   |   |
| Melanogenesis                                         | 7 | 7 |   | 3 | 1 | 2 |   |   | 1 | 1 |   |   |   |   |
| Pancreatic secretion                                  | 7 | 7 |   |   | 2 | 5 |   |   | 2 | 1 | 1 |   |   |   |
| Collecting duct acid secretion                        | 7 | 6 |   |   |   | 5 |   | 1 | 3 |   | 1 |   |   | 2 |
| Colorectal cancer                                     | 7 | 6 |   |   | 2 | 3 |   |   | 2 | 2 |   |   |   |   |
| Aldosterone-regulated sodium reabsorption             | 7 | 5 |   |   | 3 | 3 |   |   | 1 |   | 1 |   |   |   |
| Arachidonic acid metabolism                           | 7 | 5 | 1 | 2 | 1 | 1 |   | 1 | 3 |   | 1 |   | 1 | 1 |
| Bladder cancer                                        | 7 | 5 | 1 | 2 |   | 2 |   |   | 3 | 2 |   |   |   | 1 |
| Hedgehog signaling pathway                            | 7 | 5 |   | 3 | 1 | 1 |   |   | 2 |   |   |   | 1 | 1 |
| Amyotrophic lateral sclerosis (ALS)                   | 7 | 4 |   |   |   | 2 |   | 2 | 4 |   | 2 | 1 |   | 1 |
| Metabolism of xenobiotics by cytochrome P450          | 7 | 4 | 1 |   |   | 2 | 1 | 1 | 4 | 2 |   |   |   | 3 |
| Melanoma                                              | 6 | 6 |   |   | 2 | 4 |   |   |   |   |   |   |   |   |
| Non-small cell lung cancer                            | 6 | 6 |   |   | 2 | 4 |   |   |   |   |   |   |   |   |
| Sphingolipid metabolism                               | 6 | 6 |   | 2 |   | 4 |   | 1 | 1 |   |   |   |   | 1 |
| ErbB signaling pathway                                | 6 | 5 |   |   | 2 | 3 |   |   | 2 | 1 |   |   |   | 1 |
| Regulation of autophagy                               | 6 | 5 |   |   |   | 4 |   | 1 | 1 |   |   |   |   | 1 |
| Steroid biosynthesis                                  | 6 | 5 |   |   |   | 5 |   |   | 1 | 1 |   |   |   |   |
| Vasopressin-regulated water reabsorption              | 6 | 5 |   | 1 |   | 2 |   | 1 | 2 | 1 | 1 |   |   |   |
| ABC transporters                                      | 6 | 4 |   | 1 |   | 3 |   |   | 2 |   |   |   | 2 |   |
| Type I diabetes mellitus                              | 6 | 4 |   | 3 |   | 1 |   |   | 2 |   | 1 |   |   | 1 |
| Drug metabolism - cytochrome P450                     | 6 | 3 |   |   |   | 2 | 1 | 1 | 4 | 2 |   |   |   | 3 |
| Other glycan degradation                              | 5 | 5 |   | 2 |   | 4 |   |   | 2 |   | 1 |   |   | 1 |
| SNARE interactions in vesicular transport             | 5 | 5 |   | 1 | 1 | 1 |   | 3 |   |   |   |   |   |   |
| NOD-like receptor signaling pathway                   | 5 | 4 |   |   | 1 | 2 | 1 |   | 3 |   | 1 |   | 1 | 1 |
| Primary immunodeficiency                              | 5 | 4 | 1 |   | 1 | 2 |   |   | 2 |   |   |   | 1 | 1 |
| African trypanosomiasis                               | 5 | 3 |   |   | 1 | 1 |   |   | 4 |   | 1 |   | 3 | 3 |
| Thyroid cancer                                        | 4 | 4 |   |   |   | 4 |   | 1 | 1 |   |   |   | 1 |   |
| Glycolysis / Gluconeogenesis                          | 4 | 3 |   |   | 1 | 1 |   | 1 | 1 |   |   |   | 1 |   |
| Synthesis and degradation of ketone bodies            | 3 | 3 |   |   |   |   |   | 3 |   |   |   |   |   |   |

Only Pathways with 3 or more affected genes per signature list are shown
