# Supplementary material for: Epigenetic transgenerational inheritance of somatic transcriptomes and epigenetic control regions
Source: PubMed Central journal article supplement (PMC3491419; doi:10.1186/gb-2012-13-10-r91), 2012-10-03
Supplement: gb-2012-13-10-r91-S8.pdf [file gb-2012-13-10-r91-S8.pdf]

**Table S4. Epigenetic Control Regions (ECR) and Tissue Specific Gene Expression**

**A. Female**

| ECR         | Female Heart                        | Female Kidney                                                                                              | Female Liver | Ovary                              | Uterus                       |
|-------------|-------------------------------------|------------------------------------------------------------------------------------------------------------|--------------|------------------------------------|------------------------------|
| chr1-81.05  | ENSRNOT00000057163                  | LOC687333 Sdccag1                                                                                          |              | Egln2 Ltbp4                        |                              |
| chr1-93.9   | RGD1309326 Snrp70                   | Snrp70 Tbc1d17                                                                                             |              | Prr12                              | LOC499144                    |
| chr1-109.35 | ENSRNOT00000053327                  | ENSRNOT00000052564<br>ENSRNOT00000053529<br>ENSRNOT00000053882<br>ENSRNOT00000053893<br>ENSRNOT00000054014 |              |                                    |                              |
| chr1-159.65 | Hbb MGC72973                        | Hbb MGC72973 Rrp8                                                                                          |              |                                    |                              |
| chr1-185.85 | ENSRNOT00000053325                  | Bag3 Ccdc95 Tgfb1i1<br>Znf688                                                                              |              |                                    |                              |
| chr1-206.4  | Drap1 Mrpl49 Mtvr2                  | BC090353<br>RGD1560108                                                                                     |              | LOC100361915<br>Ccdc85b Ltbp3 Rela | Slc25a45                     |
| chr2-188.8  | Gpr89                               | LOC100363361<br>FQ217306 Sv2a                                                                              |              | Car14 Oaz3                         | Lingo4 Plekho1 Rbm8<br>Sf3b4 |
| chr3-107.4  | MGC105649 Ndufb4<br>RGD1562529      | Slc28a2                                                                                                    |              | Slc28a2                            |                              |
| chr3-112.8  | Ciao1<br>ENSRNOT00000055921         | Ap4e1<br>ENSRNOT00000055921<br>Trpm7                                                                       |              | Anapc1                             |                              |
| chr3-7.2    | Setx                                | LOC499770                                                                                                  |              | ENSRNOT00000052447<br>Odf2         | Setx                         |
| chr4-165.3  | Klrb1c Klri1                        | MGC94282                                                                                                   |              | Pzp                                | LOC690045                    |
| chr4-26.2   | Cyp51                               | RGD1561472 Samd9l                                                                                          |              | Gng11                              |                              |
| chr5-142.1  | ENSRNOT00000052635<br>Mtf1          | LOC100366213 Macf1                                                                                         |              | Fhl3 Sf3a3                         |                              |
| chr5-151.75 | Fusip1 RGD1359529<br>Smpdl3b Tmem57 | RGD1359529                                                                                                 | Sh3bgrl3     | Tmem57                             | LOC689826                    |
| chr5-59.9   | Gba2 Ncbp1 Zcchc7                   | Tpm2                                                                                                       |              | Exosc3                             | 10868796                     |
| chr6-125.35 | Atxn3                               | Tc2n                                                                                                       |              | Asb2 Cpsf2 Trip11                  | ENSRNOT00000011530           |
| chr7-8.5    | ENSRNOT00000048364<br>Sf3a2         | Dot1l<br>ENSRNOT00000053394<br>LOC100125368                                                                |              | Cirbp Mbrl Scamp4                  |                              |
| chr7-118.8  | Rrp7a Ttll12                        | Cyp2d5<br>ENSRNOT00000039879<br>Tnrc6b                                                                     |              | Cyp2d4v1 Cyp2d5                    |                              |
| chr7-48.35  | 10902292*                           | Bbs10 Nav3<br>RGD1561474 Zdhhc17                                                                           |              | Phlda1                             |                              |
| chr10-13.6  | Axin1                               | LOC287167 Luc7l                                                                                            |              | Hba-a2 Hba-a2<br>RGD1310922        | Hba-a2 Hba-a2                |
| chr10-55.7  | Slc2a4                              | Alox15                                                                                                     |              | Rnasek Zbtb4                       | Zfp3                         |
| chr12-19.65 | Ap1s1 Mepce                         | Prkrip1                                                                                                    |              | Agfg2 Serpine1                     |                              |

|             |                     |                                                                   |  |                               |             |
|-------------|---------------------|-------------------------------------------------------------------|--|-------------------------------|-------------|
| chr13-85.75 | Pcp4l1              | Atp1a2 Cd48 Kcnj10 Slamf9                                         |  | 10769693 Pigm Uap1            | Apoa2       |
| chr15-3.45  |                     | Spetex-2A Spetex-2C<br>Spetex-2D Spetex-2F<br>Spetex-2G Spetex-2H |  |                               |             |
| chr16-17.3  | Ccdc124 Eil Slc27a1 | Cnot7 Tmem38a                                                     |  | Pgpep1                        |             |
| chr19-24.55 | Nacc1               | Elmod2 Ier2                                                       |  | Nfix Zswim4                   |             |
| chr20-2.75  | ENSRNOT00000059561  | ENSRNOT00000052790<br>RT1-Bb                                      |  | Ppp1r10 Rpl13-ps1             | Neu1 Zbtb22 |
| chrX-39     | RGD1561065          | RGD1561065                                                        |  | 10937568 Alas2 Gnl3l<br>Smc1a | Alas2       |

### B. Male

| Cluster Name | Male Heart | Male Kidney                                                           | Male Liver | Testis                  | Seminal Vesicle                                                                                                                                                                                                                                                                            | Prostate                                                                              |
|--------------|------------|-----------------------------------------------------------------------|------------|-------------------------|--------------------------------------------------------------------------------------------------------------------------------------------------------------------------------------------------------------------------------------------------------------------------------------------|---------------------------------------------------------------------------------------|
| chr1-78.4    |            | Bloc1s3 Ceacam6<br>Pafah1b3<br>Trappc6a                               | Axl Qpctl  | Bckdha Snrpd2<br>Znf574 | Atp5sl Lipe                                                                                                                                                                                                                                                                                | 10705102 Clptm1<br>Erc1 Gsk3a<br>LOC686781 Pvr12                                      |
| chr1-81.6    |            | Eid2 Polr2i Psmc4<br>RGD1562079<br>Sdccag1<br>Tmem147 Tyrobp<br>Zfp36 |            | LOC687295               | Blvrb Gramd1a<br>Zfp36                                                                                                                                                                                                                                                                     | Sipa1l3 Aplp1<br>Gmfg Pld3<br>RGD1303117<br>Sipa1l3 Tyrobp<br>Yif1b Zfp36             |
| chr1-93.35   |            | Aldh16a1 Irf3 Kik1l<br>LOC494539<br>MGC93975 Pnkp<br>Rras Snrp70      |            | Napsa Siglec5           | ENSRNOT000000<br>52978<br>ENSRNOT000000<br>53402                                                                                                                                                                                                                                           | Atpbd3 Cd37<br>Med25<br>MGC93975<br>Myh14 Nomo1<br>Ptov1<br>RGD1564800<br>Sphk2 Trpm4 |
| chr1-109.4   |            | ENSRNOT000000<br>52993<br>ENSRNOT000000<br>54014                      |            |                         | ENSRNOT000000<br>52507<br>ENSRNOT000000<br>52564<br>ENSRNOT000000<br>52661<br>ENSRNOT000000<br>53019<br>ENSRNOT000000<br>53117<br>ENSRNOT000000<br>53184<br>ENSRNOT000000<br>53855<br>ENSRNOT000000<br>53882<br>ENSRNOT000000<br>53934<br>ENSRNOT000000<br>53936<br>ENSRNOT000000<br>53974 | ENSRNOT000000<br>52564<br>ENSRNOT000000<br>53081<br>ENSRNOT000000<br>53882            |

|             |                                                           |                                                                                                                                                                                            |                                         |                                                                                                                                                                                                                              |                                                |                                                                                                                                                                           |
|-------------|-----------------------------------------------------------|--------------------------------------------------------------------------------------------------------------------------------------------------------------------------------------------|-----------------------------------------|------------------------------------------------------------------------------------------------------------------------------------------------------------------------------------------------------------------------------|------------------------------------------------|---------------------------------------------------------------------------------------------------------------------------------------------------------------------------|
| chr1-184.85 |                                                           | Bcl7c Coro1a                                                                                                                                                                               |                                         | Cdipt<br>ENSRNOT000000<br>53325 Prr14 Xpo6<br>Xtp3tpa                                                                                                                                                                        | Ccdc95 Eif3c                                   | Tbc1d10b Rabep2<br>Rnf40                                                                                                                                                  |
| chr1-200.8  |                                                           | Lsp1 Mrpl23 Rnh1<br>Tspan4                                                                                                                                                                 |                                         | Tmem80 Tspan4                                                                                                                                                                                                                | Lsp1                                           | Irf7 Lsp1 Tollip<br>Tssc4                                                                                                                                                 |
| chr1-204.75 | ENSRNOT000<br>00052494<br>ENSRNOT000<br>00053169<br>Ltpb3 | Tmem223 B3gnt1<br>BC090353 Cox8a<br>Cpsf7 Eef1g<br>Eif1ad<br>ENSRNOT000000<br>52494<br>ENSRNOT000000<br>53169 Frmd8<br>Mtvr2 Nxf1 Otub1<br>Ppfia1<br>RGD1566262<br>Tmem134<br>Unc93b1 Yif1 | Chka Esrra<br>Ms4a11 Rab3il1<br>Tmem109 | LOC100361529<br>LOC100362601<br>LOC100363176<br>Tmem223 Aip<br>Cpsf7 Dpf2<br>ENSRNOT000000<br>53552<br>ENSRNOT000000<br>54147<br>ENSRNOT000000<br>69284 Ndufs8<br>Nxf1 Otub1 Pcnxl3<br>Ppfia1 Rbm14<br>Rpl35a Sf1<br>Slc29a2 | Ms4a11 Ms4a6b<br>Rela<br>RGD1560108<br>Slc15a3 | BC090353 Ccnd1<br>Cdc42bpg Cpt1a<br>Ddb1 Ganab Ints5<br>Mark2 Ms4a11<br>Ms4a6a Ppfia1<br>Rce1<br>RGD1562657<br>RGD1566262<br>Rtn3 Slc3a2<br>Syvn1 Trpt1<br>Vps37c Zdhhc24 |
| chr2-180.15 | LOC685152                                                 | Dennd4b Lmna<br>S100a6                                                                                                                                                                     | Il6ra                                   | Ints3<br>RGD1561797<br>Rps27 S100a6                                                                                                                                                                                          | Dap3 Krtcap2<br>RGD1564171                     | Ints3 Lenep Pygo2<br>RGD1303130<br>Sema4a Slc25a44                                                                                                                        |
| chr2-188.65 | Ctsk                                                      | Setdb1 Hist2h3c2                                                                                                                                                                           | Ctss Fcgr1a<br>LOC690012 Prpf3<br>Txnip | LOC100363361<br>Lass2 mrpl9                                                                                                                                                                                                  | Hist2h2bb Txnip                                | LOC100363361<br>Acp6 Fcgr1a<br>Tars2 Vps72                                                                                                                                |
| chr20-9.25  |                                                           | Abcg1<br>ENSRNOT000000<br>53196<br>ENSRNOT000000<br>53957 Pcbp3<br>RGD1561557                                                                                                              |                                         |                                                                                                                                                                                                                              | Pdxk S100b                                     | Lss RGD1309594<br>RGD1311257<br>RGD1561557<br>Slc37a1 Trappc10<br>Zfp280b                                                                                                 |
| chr3-144.75 |                                                           | 10851019 Rbm39<br>Scand1                                                                                                                                                                   |                                         | Edem2<br>ENSRNOT000000<br>69216                                                                                                                                                                                              | Ergic3 Ncoa6                                   | Ergic3 Map1lc3a<br>Ndr3 Trpc4ap                                                                                                                                           |
| chr4-75.4   | 10862453<br>Ccdc126                                       | 10862453<br>Tmem176a                                                                                                                                                                       | Gpnmb                                   | ENSRNOT000000<br>53328 FQ223410                                                                                                                                                                                              | Pdia4 Repin1                                   | 10862453 Zfp212<br>Znf746                                                                                                                                                 |
| chr5-136.75 |                                                           | Ccdc17<br>GENSCAN000000<br>21509 Kdm4a<br>Zswim5                                                                                                                                           |                                         | ENSRNOT000000<br>52542<br>ENSRNOT000000<br>56936 Mmachc                                                                                                                                                                      | BC105775                                       | Mmachc Ptpfr<br>RGD1308616                                                                                                                                                |
| chr5-163.75 |                                                           | ENSRNOT000000<br>54574 Fbxo6<br>LOC500584<br>LOC691261<br>LOC691431<br>Spsb1                                                                                                               |                                         |                                                                                                                                                                                                                              | LOC691280<br>ENSRNOT000000<br>53105 Rpl35a     | Tmem201 Clstn1<br>Dffa Gpr157 Kif1b<br>Mad2l2 Mthfr<br>Ube4b Ubiad1                                                                                                       |
| chr6-132.3  |                                                           | Mir667 Mir341                                                                                                                                                                              |                                         |                                                                                                                                                                                                                              |                                                | LOC100363014<br>AB014877<br>AB014878<br>AB014879<br>AB014881<br>ENSRNOT000000<br>53070<br>ENSRNOT000000<br>53573<br>ENSRNOT000000<br>53832<br>ENSRNOT000000               |

|                  |      |                                                                                        |                          |                             |                                                  |                                                                                                                        |
|------------------|------|----------------------------------------------------------------------------------------|--------------------------|-----------------------------|--------------------------------------------------|------------------------------------------------------------------------------------------------------------------------|
|                  |      |                                                                                        |                          |                             |                                                  | 54021<br>ENSRNOT000000<br>54054<br>ENSRNOT000000<br>54133 FQ212998<br>FQ213989<br>LOC690965<br>Slc25a29 Tecpr2<br>Wars |
| chr6-137.4       |      | FQ218314                                                                               |                          | Nudt14                      | LOC691616                                        | Adam6<br>ENSRNOT000000<br>48037 IgG-2a IgG-<br>2a Ighg Jag2<br>LOC500726<br>LOC678701<br>LOC691616 Mta1                |
| chr7-112.3       |      | Bop1 Exosc4<br>Gsdmd Mfsd3<br>Mpst<br>RGD1359378 Tst                                   | Bop1 Csf2rb Ly6c<br>Ly6e | Tsta3                       | Scrib                                            | Bop1<br>ENSRNOT000000<br>56375 Ly6c Ncf4<br>Plec1 rCG_59505<br>RGD1309808<br>Scrib Siahbp1                             |
| chr7-8.5         |      | Dapk3 Dot1l<br>Fam108a1 Lsm7<br>Mbd3 Mknk2<br>RGD1307067<br>RGD1359127<br>Rps15 Timm13 |                          | Midn                        | Dot1l LOC314605<br>Mrpl54<br>RGD1359127<br>Wdr18 | Abca7 Ap3d1 Eef2<br>Mbrl Med16 Ncln<br>Scamp4 Sppl2b<br>Zfp70911                                                       |
| chr8-112.8       |      | Impdh2 Klhl18                                                                          | Ip6k2 Plxnb1<br>Pthr1    | Map4 Nme6<br>Slc38a3 Spink8 | Amigo3                                           | Nbeal2 Ptpn23<br>Scap Slc26a6                                                                                          |
| chr8-45.4        |      | 10916853 Dpagt1<br>Oaf                                                                 | Mpzl2 Tmem24             | Atp5l Hmbs                  | Hyou1                                            | Dpagt1<br>ENSRNOT000000<br>53557 Hyou1<br>Pvrl1 Rnf26<br>Tmem24 Vps11                                                  |
| chr9-8.35        |      | LOC100360664<br>Med20 Polr1c<br>Tomm6                                                  | Taf8                     | Med20                       | LOC363188                                        | Foxp4<br>LOC363188 Srf                                                                                                 |
| chr9-72.25       |      | Aamp Des Plcd4<br>Stk36                                                                |                          | Rqcd1                       | ENSRNOT000000<br>57365 Stk36                     | Aamp Pnkd Rqcd1<br>Slc11a1 Stk11ip                                                                                     |
| chr10-<br>104.15 |      | Cd300le<br>ENSRNOT000000<br>69295 Mrpl38<br>RGD1311078                                 | RGD1561778               | Mrps7 Rps18<br>Sec14l1      | Cygb Slc25a19<br>Slc9a3r1                        | Gprc5c Itgb4<br>RGD1306284<br>RGD1307394<br>RGD1561778<br>Slc9a3r1 Ube2o                                               |
| chr10-<br>12.15  |      | Srrm2 Tnfrsf12a                                                                        |                          | Nme3                        | Mapk8ip3 Rnps1                                   | Abca3 Atp6v0c<br>ENSRNOT000000<br>60779 Jmjd8 Mare<br>Mpg Rnps1 Spsb3<br>Tbi3 Wdr24<br>Znf598                          |
| chr10-38.9       |      | Atox1 LOC303140<br>P4ha2 Rpl13                                                         | lrf1                     | Hint1                       | P4ha2                                            | Cdc42se2<br>ENSRNOT000000<br>54033 Slc36a1                                                                             |
| chr10-<br>54.75  | Per1 | Per1 Pfn1<br>Tmem88                                                                    | Per1                     | Pelp1 Slc25a35              | Cd68 Plscr3 Rpain                                | Fxr2 Pelp1<br>Tmem102 Tnk1                                                                                             |

|             |                                 |                                                                                  |                        |                                                                                                   |                                         |                                                                                                                                                  |
|-------------|---------------------------------|----------------------------------------------------------------------------------|------------------------|---------------------------------------------------------------------------------------------------|-----------------------------------------|--------------------------------------------------------------------------------------------------------------------------------------------------|
| chr10-62.45 |                                 | ENSRNOT000000<br>41305<br>ENSRNOT000000<br>54438                                 | Tmem97                 | Dbil5 Prpf8<br>RGD1566149<br>Slc43a2                                                              | Rab34                                   | Dph1 Pigs Pitpna<br>Vps53                                                                                                                        |
| chr10-86.55 | Klhl11                          | Ccr7<br>ENSRNOT000000<br>45189<br>ENSRNOT000000<br>48840 Krt40<br>LOC680286 Vat1 | Arf4l Rara Zpbp2       | BC099108 Hspb9<br>Rnd2 Rpl35a                                                                     | Eif1 Nr1d1 Zpbp2                        | Atp6v0a1 Becn1<br>Eif1 Fbxl20<br>Gcn5l2 Jup<br>Krtap9-1 Mpp2<br>Nags Nkiras2<br>RGD1311493                                                       |
| chr10-9.85  |                                 | Hmox2<br>LOC363543<br>Rbm25                                                      |                        |                                                                                                   | Btbd12 Magmas                           | LOC100362008<br>Anks3 Mgrn1 N-<br>pac Ubn1                                                                                                       |
| chr12-15.65 |                                 | Mir339 Asmtl<br>Gpr146 Mblac1<br>RGD1311660                                      |                        | LOC288526                                                                                         | Rpl31                                   | Cops6 Taf6<br>Unc84a                                                                                                                             |
| chr12-21.3  |                                 | Dnajc30 Por<br>Rhbdd2 Wbscr27                                                    |                        | Polr2j                                                                                            | 10761285 Bcl7b                          | Abhd11 Clip2<br>Eif4h Rhbdd2                                                                                                                     |
| chr12-31.75 |                                 | Ccdc62                                                                           | Ccdc92                 | Vps37b Zfoc1                                                                                      | Ubc                                     | Atp6v0a2 Eif2b1<br>Hip1r Pitpnm2<br>Setd8-ps1 Ubc                                                                                                |
| chr12-41    | Gltp                            | Gltp RGD1311899                                                                  | Ficd                   | Acads Pop5 Pxn<br>Sppl3                                                                           | Ficd Gcn111                             | Acacb Mlec Oasl2<br>Pxn Rnf10 Sart3<br>Sppl3                                                                                                     |
| chr13-85.65 |                                 | ENSRNOT000000<br>53447 FQ230857<br>Pea15a                                        | 10769693<br>FQ230857   | Fcer1g Ppox<br>Tagln2                                                                             | ENSRNOT000000<br>53447 Tomm40b<br>Usp21 | Cd84 F11r Fcgr2b                                                                                                                                 |
| chr14-36.1  | Nfxl1<br>ENSRNOT000<br>00002991 | Nfxl1<br>RGD1310958                                                              | ENSRNOT000000<br>02991 | RGD1311309                                                                                        | Nfxl1<br>RGD1359201                     | Ociad1                                                                                                                                           |
| chr14-82.2  |                                 | Atp5e Selm                                                                       | Depdc5                 | Atp5e Depdc5<br>LOC685322 Sf3a1                                                                   | RGD1305469<br>Dusp18<br>RGD1560636      | Maea Tmem129<br>Ywhah                                                                                                                            |
| chr15-31.9  |                                 | Mcpt2 Rabggta<br>Thtpa Y09171                                                    | Homez                  | Homez                                                                                             | Dhrs1 Psmb5                             | Lrp10 Mcpt1<br>Mcpt2 Rabggta<br>RGD1565222<br>Tinf2 Zfhx2                                                                                        |
| chr16-17.45 |                                 | ENSRNOT000000<br>34446 FQ211569<br>Ifi30 MGC72612<br>Mrpl34                      | Uba52                  | Eil                                                                                               | ENSRNOT000000<br>51889 Slc25a42<br>Use1 | Atp13a1 Bst2<br>Gatad2a Jund<br>MGC72612 Pik3r2<br>Rab3a Rent1<br>RGD1308759<br>Slc35e1                                                          |
| chr19-23.6  | Dnajb1<br>RGD1564739            | Gadd45gip1 Mri1<br>Prdx2                                                         | Cd97                   | Prdx2 Rad23a                                                                                      | Gcdh Hook2                              | Gpsn2 Nfix<br>RGD1308221<br>Tnpo2                                                                                                                |
| chr19-34.95 |                                 | LOC690214 Nqo1<br>Pskh1 Rps12                                                    |                        | Sntb2                                                                                             | Cirh1a Nfatc3<br>Tmem208                | Cog8 Ddx28<br>Pskh1                                                                                                                              |
| chr20-2     |                                 | H2-T23 Hla-dma<br>Neu1 Nudt3<br>Tapbp Tubb5                                      | RGD1303066<br>Taf11    | Agpat1 Bat1 Brpf3<br>ENSRNOT000000<br>52790<br>ENSRNOT000000<br>52797<br>RGD1306917<br>Rnf8 Rps18 | Spdef Trim39                            | RGD1307264<br>Abcf1 Atf6b Bat2<br>Cdkn1a<br>ENSRNOT000000<br>36804 Ftsjd2 H2-<br>T24 Itpr3 Mapk13<br>Neu1 Phf1 Psmb8<br>Tbc1d22b U15425<br>Znf76 |

Genes expressed within ECR per tissue presented. \* - if EST didn't have any other ID numbers, Affymetrix RatGene 1.0 ST probeset number was used to enlist it into the table.
