# Supplementary material for: Epigenetic transgenerational inheritance of somatic transcriptomes and epigenetic control regions
Source: PubMed Central journal article supplement (PMC3491419; doi:10.1186/gb-2012-13-10-r91), 2012-10-03
Supplement: gb-2012-13-10-r91-S9.pdf [file gb-2012-13-10-r91-S9.pdf]

**Supplemental Table S5.**

**Long non-coding RNA (lncRNA) Association with ECR**

| <b>lncRNA Symbol</b>           | <b>lnc RNA Genome Location</b>           | <b>ECR</b>   |
|--------------------------------|------------------------------------------|--------------|
| antiPeg11                      | <u>rn4 chr6:134,182,037-134,187,063</u>  | chr6:132.3   |
| B2 SINE RNA                    | N/A                                      |              |
| BC1                            | N/A                                      |              |
| Beta-MHC antisense transcripts | N/A                                      |              |
| Bsr                            | <u>rn4 chr6:134,198,113-134,328,710</u>  | chr6:132.3   |
| Evf2                           | <u>rn4 chr4:31,722,073-31,770,275</u>    | NA           |
| GAS5                           | <u>rn4 chr13:76,594,781-76,598,102</u>   | NA           |
| H19                            | <u>rn4 chr1:202,822,926-202,825,601</u>  | chr1:200.8   |
| HOTAIR                         | <u>rn4 chr7:141,707,460-141,711,096</u>  | NA           |
| HOTAIRM1                       | <u>rn4 chr4:80,458,677-80,462,167</u>    | NA           |
| Khps1a                         | <u>rn4 chr10:106,639,811-106,641,100</u> | chr10:104.15 |
| MEG9                           | <u>rn4 chr6:134,410,685-134,431,542</u>  | chr6:132.3   |
| NEAT1                          | <u>rn4 chr1:208,476,553-208,479,839</u>  | chr1:206.4   |
| PINC                           | <u>rn4 chr9:72,706,829-72,723,152</u>    | chr9:72.25   |
| RNCR3                          | <u>rn4 chr15:43,941,969-43,947,942</u>   | NA           |
| SNHG6                          | <u>rn4 chr5:8,840,469-8,842,569</u>      | NA           |
| SRA                            | <u>rn4 chr18:29,306,556-29,309,970</u>   | NA           |
| TUG1                           | <u>rn4 chr14:84,283,176-84,293,598</u>   | chr14:82.2   |
| Zfas1                          | <u>rn4 chr3:158,214,340-158,216,912</u>  | NA           |
| Zfx2as                         | <u>rn4 chr15:33,178,036-33,180,752</u>   | chr15:31.9   |
